# Supplementary material
Source: publisher figshare collection journal article supplement (https://acs.figshare.com/ndownloader/files/25538153)
Supplement: Supplementary file 1 [file 25538153]

## Sheet: information
Supporting Information 1
Transcriptome analysis illuminates a hub role of SREBP2 in cholesterol metabolism by α-mangostin
Hee-Sung Chae†, Hyun Ji Kim†, Hyun-Jeong Ko‡, Chang Hoon Lee†, Young Hee Choi†, and Young-Won Chin§,*
†College of Pharmacy and Integrated Research Institute for Drug Development, Dongguk University_Seoul, 32 Dongguk-lo, Ilsandong-gu, Goyang-si, Gyeonggi-do 10326, Republic of Korea
‡Laboratory of Microbiology and Immunology, College of Pharmacy, Kangwon National University, 1 Gangwondaehakgil, Chuncheon-si, Gangwon-do 24341, Republic of Korea
§College of Pharmacy and Research Institute of Pharmaceutical Sciences, Seoul National University, 1 Gwanak-lo, Gwanak-gu, Seoul 08826, Republic of Korea
*Corresponding author: Young-Won Chin
Email: ywchin@snu.ac.kr
Table S1. RNA sequencing results for differentially expressed genes in HepG2 cells of dose dependently treated with α-mangostin compared to un-treated cells.
Table S2. Full list of KEGG enrichment terms for differentially expressed genes in HepG2 cells of α-mangostin (10 μM) treatment compared to un-treated cells.
Table S3. Full list of GO enrichment terms for differentially expressed genes in HepG2 cells of α-mangostin (10 μM) treatment compared to un-treated cells.

## Sheet: Table. S1.
.	◎ : Q-value ≤ 0.01				Secondary sets of all the pairs		Group A	Group B	Group C	Group D									Supplemental information
Gene Symbol	c-vs-a20 DEGs	c-vs-a10 DEGs	c-vs-A DEGs	a20-vs-a10 DEGs	Intersection	Union	c	a20	a10	A	c_1	c_0	a20_0	a20_1	a10_1	a10_0	A_0	A_1	Full descriptions of the gene	Locus on hg19 reference sequence	RefSeq mRNA	RefSeq mRNA predicted	RefSeq ncRNA	RefSeq ncRNA predicted	RefSeq protein	RefSeq protein predicted	Gene type	Ensembl Gene ID	EntrezGene ID	HGNC ID(s)
A1BG	◎	.	.	.	.	◎	1.16433	0.660629	0.325912	56.9936	54.7913	48.2742	24.0279	22.5849	38.0836	34.3759	59.4211	54.5661	alpha-1-B glycoprotein [Source:HGNC Symbol;Acc:HGNC:5]	chr19:58858215-58864865	NM_130786	.	.	.	NP_570602	.	protein_coding	ENSG00000121410	1	5
A1CF	.	.	.	.	.	.	0	0	0	23.22	20.3945	20.2497	19.4838	19.6733	17.6235	22.167	23.3243	23.1157	APOBEC1 complementation factor [Source:HGNC Symbol;Acc:HGNC:24086]	chr10:52559168-52645435	NM_001198818, NM_001198819, NM_001198820, NM_014576, NM_138932, NM_138933	XM_017016160, XM_011539730, XM_011539729, XM_005269720, XM_005269718	.	.	NP_001185747, NP_001185748, NP_001185749, NP_055391, NP_620310, NP_620311	XP_005269775, XP_005269777, XP_011538031, XP_011538032, XP_016871649	protein_coding	ENSG00000148584	29974	24086
A2M	◎	.	.	.	.	◎	0	0	0.00559216	2341.9	2301.88	2450.25	1018.68	965.403	1910.31	2017.3	2312.7	2371.1	alpha-2-macroglobulin [Source:HGNC Symbol;Acc:HGNC:7]	chr12:9220307-9268753	NM_000014	XM_006719056	.	.	NP_000005	XP_006719119	protein_coding	ENSG00000175899	2	7
A2ML1	.	.	.	.	.	.	6.49804	3.98875	8.86699	0	0	0	0	0	0	0	0	0	alpha-2-macroglobulin like 1 [Source:HGNC Symbol;Acc:HGNC:23336]	chr12:8975067-9029381	NM_001282424, NM_144670	XM_011520567, XM_011520566	.	.	NP_001269353, NP_653271	XP_011518868, XP_011518869, XP_016874357, XP_016874358, XP_016874359	protein_coding	ENSG00000166535	144568	23336
A3GALT2	.	.	.	.	.	.	0	0	0	0	0	0	0	0	0	0	0	0	alpha 1,3-galactosyltransferase 2 [Source:HGNC Symbol;Acc:HGNC:30005]	chr1:33772366-33786699	NM_001080438	.	.	.	NP_001073907	.	protein_coding	ENSG00000184389	127550	30005
A4GALT	.	.	.	.	.	.	53.8406	19.2751	46.0171	0.266145	0.324456	0.100593	0.375608	0.22195	0.465945	0.416997	0.243229	0.289061	alpha 1,4-galactosyltransferase [Source:HGNC Symbol;Acc:HGNC:18149]	chr22:43088126-43091639	NM_001318038, NM_017436	XM_011530234, XM_011530233, XM_006724266, XM_006724265, XM_005261648, XM_005261647, XM_005261646, XM_005261644, XM_005261643	.	.	NP_001304967, NP_059132	XP_005261700, XP_005261701, XP_005261703, XP_005261704, XP_005261705, XP_006724328, XP_006724329, XP_011528535, XP_011528536, XP_016884320	protein_coding	ENSG00000128274	53947	18149
A4GNT	.	.	.	.	.	.	0	0	0	0	0	0	0	0	0	0	0	0	alpha-1,4-N-acetylglucosaminyltransferase [Source:HGNC Symbol;Acc:HGNC:17968]	chr3:137842559-137851229	NM_016161	.	.	.	NP_057245	XP_016862032, XP_016862033	protein_coding	ENSG00000118017	51146	17968
AAAS	.	.	.	.	.	.	45.1003	11.1934	10.3952	33.9503	33.2612	34.9864	31.8954	32.7549	33.7694	31.3847	33.1501	34.7504	aladin WD repeat nucleoporin [Source:HGNC Symbol;Acc:HGNC:13666]	chr12:53701239-53718542	NM_001173466, NM_015665	XM_011538780, XM_011538779, XM_011538778, XM_011538777, XM_006719617	.	.	NP_001166937, NP_056480	XP_011537080, XP_011537082	protein_coding	ENSG00000094914	8086	13666
AACS	.	.	.	.	.	.	40.1526	16.5619	23.2852	18.7679	18.4649	18.8413	18.1717	17.6352	19.9972	18.873	19.6778	17.8581	acetoacetyl-CoA synthetase [Source:HGNC Symbol;Acc:HGNC:21298]	chr12:125549924-125627866	NM_023928	XM_005253610, XM_005253609	.	.	NP_076417	.	protein_coding	ENSG00000081760	65985	21298
AADAC	.	.	.	.	.	.	0.192944	2.88179	0.245441	1.18156	1.60548	1.44974	0.415162	0.545156	0.914629	0.904979	1.00378	1.35933	arylacetamide deacetylase [Source:HGNC Symbol;Acc:HGNC:17]	chr3:151531824-151546276	NM_001086	XM_005247104	.	.	NP_001077	XP_005247161	protein_coding	ENSG00000114771	13	17
AADACL2	.	.	.	.	.	.	0	0	0	0	0	0	0	0	0	0	0	0	arylacetamide deacetylase like 2 [Source:HGNC Symbol;Acc:HGNC:24427]	chr3:151451714-151475554	NM_207365	.	.	.	NP_997248	.	protein_coding	ENSG00000197953	344752	24427
AADACL3	.	.	.	.	.	.	0	0	0.0169982	0	0	0	0	0	0	0	0	0	arylacetamide deacetylase like 3 [Source:HGNC Symbol;Acc:HGNC:32037]	chr1:12776145-12788367	NM_001103170	.	NR_111984	.	NP_001096640	.	protein_coding	ENSG00000188984	126767	32037
AADACL4	.	.	.	.	.	.	0	0	0	0	0	0	0	0	0	0	0	0	arylacetamide deacetylase like 4 [Source:HGNC Symbol;Acc:HGNC:32038]	chr1:12704565-12727097	NM_001013630	.	.	.	NP_001013652	.	protein_coding	ENSG00000204518	343066	32038
AADAT	.	.	.	.	.	.	5.23715	3.70035	3.39989	4.75486	3.88145	3.7858	3.03896	2.68816	S	3.33949	4.59973	4.90999	aminoadipate aminotransferase [Source:HGNC Symbol;Acc:HGNC:17929]	chr4:170981372-171011538	NM_001286682, NM_001286683, NM_016228, NM_182662	XM_006714231	.	.	NP_001273611, NP_001273612, NP_057312, NP_872603	XP_006714294	protein_coding	ENSG00000109576	51166	17929
AAED1	.	.	.	.	.	.	5.93651	8.62634	8.64475	9.67895	9.06831	8.39438	9.15358	10.898	8.37346	8.20397	9.15551	10.2024	AhpC/TSA antioxidant enzyme domain containing 1 [Source:HGNC Symbol;Acc:HGNC:16881]	chr9:99401858-99417563	NM_153698	XM_005251784, XM_005251783	.	.	NP_714542	XP_005251840, XP_005251841	protein_coding	ENSG00000158122	195827	16881
AAGAB	.	.	.	.	.	.	35.846	48.9119	35.3382	10.08	10.3377	10.6663	17.0917	16.5247	12.579	12.2963	10.6215	9.53853	alpha- and gamma-adaptin binding protein [Source:HGNC Symbol;Acc:HGNC:25662]	chr15:67493370-67794142	NM_001271885, NM_001271886, NM_024666	XM_011522020	.	.	NP_001258814, NP_001258815, NP_078942	XP_011520322	protein_coding	ENSG00000103591	79719	25662
AAK1	◎	.	.	◎	.	◎	3.04716	6.58871	3.51313	1.989	1.14257	1.16043	6.406	7.79668	1.99632	1.87008	2.0404	1.9376	AP2 associated kinase 1 [Source:HGNC Symbol;Acc:HGNC:19679]	chr2:69688531-69870849	NM_014911	.	.	.	NP_055726	.	protein_coding	ENSG00000115977	22848	19679
AAMDC	.	.	.	.	.	.	18.6994	20.7238	16.516	32.1151	25.6495	24.0465	12.1754	15.5558	20.9647	24.3426	33.1111	31.1191	adipogenesis associated Mth938 domain containing [Source:HGNC Symbol;Acc:HGNC:30205]	chr11:77532154-77705724	NM_001316961, NM_001316962, NM_024684	XM_011544969, XM_011544968, XM_005273938	.	.	NP_001303886, NP_001303887, NP_001303889, NP_001303890, NP_001303891, NP_078960	XP_005273995, XP_011543270, XP_011543271	protein_coding	ENSG00000087884	28971	30205
AAMP	.	.	.	.	.	.	132.068	123.013	111.541	114.743	109.252	114.444	116.761	118.902	105.915	109.736	115.077	114.408	angio associated migratory cell protein [Source:HGNC Symbol;Acc:HGNC:18]	chr2:219128845-219134980	NM_001087, NM_001302545	.	.	.	NP_001078, NP_001289474	.	protein_coding	ENSG00000127837	14	18
AANAT	.	.	.	.	.	.	0.0482345	0.0411796	0.0170021	0.0222396	0	0	0	0	0	0	0	0.0444793	aralkylamine N-acetyltransferase [Source:HGNC Symbol;Acc:HGNC:19]	chr17:74449432-74466199	NM_001088, NM_001166579	XM_011524423, XM_011524415	.	.	NP_001079, NP_001160051	XP_011522717, XP_011522725, XP_016879748	protein_coding	ENSG00000129673	15	19
AAR2	.	.	.	.	.	.	48.1172	51.1984	34.9413	34.8514	35.2409	34.0892	39.3662	39.1551	34.5919	32.7942	35.0972	34.6056	AAR2 splicing factor homolog [Source:HGNC Symbol;Acc:HGNC:15886]	chr20:34824380-34858840	NM_001271874, NM_015511	XM_011528763, XM_011528762, XM_006723770	.	.	NP_001258803, NP_056326	XP_006723833, XP_011527064, XP_011527065	protein_coding	ENSG00000131043	25980	15886
AARD	.	.	.	.	.	.	0.200498	0.189875	0.295456	0	0	0	0	0	0	0	0	0	alanine and arginine rich domain containing protein [Source:HGNC Symbol;Acc:HGNC:33842]	chr8:117950437-117956726	NM_001025357	.	.	.	NP_001020528	.	protein_coding	ENSG00000205002	441376	33842
AARS	.	.	.	.	.	.	76.5642	45.2796	41.2993	53.0689	58.2264	58.5096	101.533	107.265	77.9073	73.7182	52.1345	54.0032	alanyl-tRNA synthetase [Source:HGNC Symbol;Acc:HGNC:20]	chr16:70286197-70323446	NM_001605	.	.	.	NP_001596	.	protein_coding	ENSG00000090861	16	20
AARS2	.	.	.	.	.	.	15.2057	8.02492	4.94646	7.00124	7.12641	6.8834	8.21747	7.89795	6.69707	6.29684	7.0735	6.92897	alanyl-tRNA synthetase 2, mitochondrial [Source:HGNC Symbol;Acc:HGNC:21022]	chr6:44238202-44281063	NM_020745	XM_011514764, XM_005249245	.	.	NP_065796	XP_005249302, XP_011513066	protein_coding	ENSG00000124608	57505	21022
AARSD1	.	.	.	.	.	.	30.8805	12.452	15.0578	6.26293	7.09543	7.75406	8.94705	8.99513	8.02478	7.30038	7.27718	5.24869	alanyl-tRNA synthetase domain containing 1 [Source:HGNC Symbol;Acc:HGNC:28417]	chr17:41102542-41132545	NM_001261434	.	.	.	NP_001248363	.	protein_coding	ENSG00000266967	80755	28417
AASDH	.	.	.	.	.	.	3.63584	2.33689	2.33588	5.58724	5.01001	5.20612	3.91928	3.65143	4.36855	4.65184	5.69956	5.47492	aminoadipate-semialdehyde dehydrogenase [Source:HGNC Symbol;Acc:HGNC:23993]	chr4:57204452-57253674	NM_001286668, NM_001286669, NM_001286670, NM_001286671, NM_001286672, NM_181806	XM_011534373, XM_005265726, XM_005265724, XM_005265721	.	.	NP_001273597, NP_001273598, NP_001273599, NP_001273600, NP_001273601, NP_861522	XP_005265778, XP_011532675, XP_016863230, XP_016863231, XP_016863232	protein_coding	ENSG00000157426	132949	23993
AASDHPPT	.	.	.	.	.	.	21.4715	18.9588	16.1971	26.8173	30.6712	29.3201	29.2818	27.614	29.5087	29.8789	28.7391	24.8956	aminoadipate-semialdehyde dehydrogenase-phosphopantetheinyl transferase [Source:HGNC Symbol;Acc:HGNC:14235]	chr11:105921824-105969437	NM_015423	.	.	.	NP_056238	.	protein_coding	ENSG00000149313	60496	14235
AASS	.	.	.	.	.	.	0.123305	0.431766	0.565585	14.434	9.72406	10.8248	5.33096	5.39653	8.15589	9.80015	15.0195	13.8484	aminoadipate-semialdehyde synthase [Source:HGNC Symbol;Acc:HGNC:17366]	chr7:121716186-121784334	NM_005763	XM_011515726, XM_011515725	.	.	NP_005754	XP_011514027	protein_coding	ENSG00000008311	10157	17366
AATF	.	.	.	.	.	.	41.3589	45.1009	39.3214	20.125	21.946	21.8412	28.8809	29.9915	23.7256	22.6811	20.2343	20.0157	apoptosis antagonizing transcription factor [Source:HGNC Symbol;Acc:HGNC:19235]	chr17:35306174-35414171	NM_012138	XM_011524611	.	.	NP_036270	XP_011522913	protein_coding	ENSG00000275700	26574	19235
AATK	◎	.	.	.	.	◎	0.425136	0.0520413	0.151387	4.79998	2.76923	2.85629	0.698478	0.481756	2.16788	1.6163	4.45197	5.14799	apoptosis associated tyrosine kinase [Source:HGNC Symbol;Acc:HGNC:21]	chr17:79008921-79156964	NM_001080395, NM_004920	XM_017025421, XM_011525510, XM_011525509, XM_006722196, XM_006722195, XM_006722194, XM_006722193	.	.	NP_001073864, NP_004911	XP_006722256, XP_006722257, XP_006722258, XP_006722259, XP_011523811, XP_011523812, XP_011523813, XP_016880910, XP_016880911	protein_coding	ENSG00000181409	9625	21
AATK-AS1	.	.	.	.	.	.	0	0	0	0.0613422	0	0.125786	0	0	0.0591477	0	0	0.122684	AATK antisense RNA 1 [Source:HGNC Symbol;Acc:HGNC:40053]	chr17:79008921-79156964	.	.	NR_027255	.	.	.	protein_coding	ENSG00000225180	388428	40053
ABAT	.	.	.	.	.	.	1.76546	9.12094	3.5423	59.21	59.8156	63.2814	31.6684	33.164	49.9752	50.3356	59.1442	59.2759	4-aminobutyrate aminotransferase [Source:HGNC Symbol;Acc:HGNC:23]	chr16:8768421-8878432	NM_000663, NM_001127448, NM_020686	XM_011522401, XM_011522400	.	.	NP_000654, NP_001120920, NP_065737	XP_011520702, XP_011520703	protein_coding	ENSG00000183044	18	23
ABC7-42404400C24.1	.	.	.	.	.	.	0.572993	0.0213771	0.160666	0.0782695	2.66583e-07	0.0661276	0	0	0.0499893	0	0.150587	0.00595153	.	chr10:46957554-46971400	.	XM_017016752, XM_011540435, XM_011540434, XM_011540433, XM_011540432, XM_011540431, XM_006718097, XM_006718095, XM_006718094, XM_006718093	.	.	.	XP_006718156, XP_006718160, XP_011538734, XP_011538736, XP_011538737, XP_011538738, XP_011538739, XP_011538740, XP_016872239, XP_016872240, XP_016872241, XP_016872509, XP_016872510, XP_016872512	protein_coding	ENSG00000277758	83849, 102724488	.
ABCA1	◎	.	.	.	.	◎	4.77409	10.0696	12.4506	23.3955	18.1832	18.1869	8.67114	9.37415	15.7057	17.0656	23.3503	23.4407	ATP binding cassette subfamily A member 1 [Source:HGNC Symbol;Acc:HGNC:29]	chr9:107543282-107690518	NM_005502	XM_011518343, XM_011518342, XM_011518341, XM_011518340, XM_011518339, XM_005251776, XM_005251773	.	.	NP_005493	XP_005251830, XP_005251833, XP_011516641, XP_011516642, XP_011516643, XP_011516644, XP_016869867, XP_016869868, XP_016869869, XP_016869870, XP_016869871	protein_coding	ENSG00000165029	19	29
ABCA10	.	.	.	.	.	.	0.0593213	0.0611063	0.0261065	0.0655322	0.0238932	0.013639	0.0264385	0.0373056	0.0391097	0.0302801	0.0802152	0.0508492	ATP binding cassette subfamily A member 10 [Source:HGNC Symbol;Acc:HGNC:30]	chr17:67144147-67323242	NM_080282	.	.	.	NP_525021	.	protein_coding	ENSG00000154263	10349	30
ABCA12	.	.	.	.	.	.	2.26885	4.78037	9.98717	0	0	0.0110261	0	0	0	0	0	0	ATP binding cassette subfamily A member 12 [Source:HGNC Symbol;Acc:HGNC:14637]	chr2:215796265-216003151	NM_015657, NM_173076	XM_011510951	.	.	NP_056472, NP_775099	XP_011509253	protein_coding	ENSG00000144452	26154	14637
ABCA13	.	.	.	.	.	.	0.0809457	0.244681	0.119023	0	0	0	0	0	0	0	0	0	ATP binding cassette subfamily A member 13 [Source:HGNC Symbol;Acc:HGNC:14638]	chr7:48211056-48687091	NM_152701	XM_011515137, XM_011515136, XM_011515135, XM_011515134, XM_011515133, XM_011515132, XM_011515131, XM_011515130	.	.	NP_689914	XP_011513432, XP_011513433, XP_011513434, XP_011513435, XP_011513436, XP_011513438, XP_011513439	protein_coding	ENSG00000179869	154664	14638
ABCA2	◎	.	.	◎	.	◎	6.38684	1.11338	2.98876	12.3408	9.10643	8.9803	2.60423	2.68454	6.9596	6.89236	12.586	12.0956	ATP binding cassette subfamily A member 2 [Source:HGNC Symbol;Acc:HGNC:32]	chr9:139901678-139923374	NM_001606, NM_212533	XM_011518346, XM_006716996	.	XR_001746224	NP_001597, NP_997698	XP_006717059	protein_coding	ENSG00000107331	20	32
ABCA3	◎	.	◎	.	.	◎	1.36497	0.448245	0.835021	1.58688	0.289629	0.327317	0.628636	1.21586	0.559571	0.860867	1.60587	1.56789	ATP binding cassette subfamily A member 3 [Source:HGNC Symbol;Acc:HGNC:33]	chr16:2325881-2390747	NM_001089	.	.	.	NP_001080	.	protein_coding	ENSG00000167972	21	33
ABCA4	.	.	.	.	.	.	0.0161144	0.0384591	0.0154078	0.233292	0.226213	0.102721	0.305143	0.451754	0.177586	0.242733	0.247665	0.21892	ATP binding cassette subfamily A member 4 [Source:HGNC Symbol;Acc:HGNC:34]	chr1:94458390-94586688	NM_000350	.	.	.	NP_000341	.	protein_coding	ENSG00000198691	24	34
ABCA5	.	.	.	.	.	.	0.813235	1.80278	1.2181	4.97642	3.14313	3.01187	5.4802	5.02966	3.19888	3.33732	5.21195	4.7409	ATP binding cassette subfamily A member 5 [Source:HGNC Symbol;Acc:HGNC:35]	chr17:67144147-67323242	NM_018672, NM_172232	.	.	.	NP_061142, NP_758424	.	protein_coding	ENSG00000154265	23461	35
ABCA6	.	.	.	.	.	.	0	0.006668	0	0.0154879	0	0.0156828	0	0.014389	0.0300836	0	0.0309758	0	ATP binding cassette subfamily A member 6 [Source:HGNC Symbol;Acc:HGNC:36]	chr17:67074842-67138029	NM_080284	XM_017024404, XM_011524574, XM_011524573, XM_006721793, XM_006721791	.	.	NP_525023	XP_011522876, XP_016879893, XP_016879894	protein_coding	ENSG00000154262	23460	36
ABCA7	.	.	.	.	.	.	3.23259	2.16303	3.0754	7.00149	8.43524	7.47372	4.98145	4.95198	5.87355	5.98242	7.0354	6.96758	ATP binding cassette subfamily A member 7 [Source:HGNC Symbol;Acc:HGNC:37]	chr19:1040101-1065568	NM_019112	XM_011527632, XM_011527631, XM_011527630, XM_011527629, XM_011527628, XM_006722616	.	.	NP_061985	XP_006722679, XP_011525930, XP_011525931, XP_011525932, XP_011525933, XP_011525934	protein_coding	ENSG00000064687	10347	37
ABCA8	.	.	.	.	.	.	0	0	0	0.0502887	0.0470868	0.048963	0.0258735	0.0244232	0.031701	0	0	0.100577	ATP binding cassette subfamily A member 8 [Source:HGNC Symbol;Acc:HGNC:38]	chr17:66863432-66951533	NM_001288985, NM_001288986, NM_007168	XM_011524192, XM_011524191, XM_005256940, XM_005256938	.	.	NP_001275914, NP_001275915, NP_009099	XP_005256995, XP_005256997, XP_011522493, XP_011522494	protein_coding	ENSG00000141338	10351	38
ABCA9	.	.	.	.	.	.	0	0.0107933	0	0.00660394	0	0	0	0.0121818	0.0127594	0	0.0132079	0	ATP binding cassette subfamily A member 9 [Source:HGNC Symbol;Acc:HGNC:39]	chr17:66970628-67057205	NM_080283	XM_017024011, XM_011524187, XM_011524186, XM_006721633, XM_005256937, XM_005256934	.	.	NP_525022	XP_011522488, XP_016879500, XP_016879501, XP_016879502, XP_016879503	protein_coding	ENSG00000154258	10350	39
ABCB1	◎	.	.	.	.	◎	0	1.01341	0.0464971	16.9477	24.9009	27.0387	58.1278	60.8124	30.7151	29.3532	17.2065	16.6889	ATP binding cassette subfamily B member 1 [Source:HGNC Symbol;Acc:HGNC:40]	chr7:87132948-87461611	NM_000927	.	.	.	NP_000918	.	protein_coding	ENSG00000085563	5243	40
ABCB10	.	.	.	.	.	.	4.93236	4.2355	6.59779	18.0686	18.8059	18.1364	12.917	14.1173	17.9598	19.8157	18.7265	17.4107	ATP binding cassette subfamily B member 10 [Source:HGNC Symbol;Acc:HGNC:41]	chr1:229652328-229694442	NM_012089	XM_011544136, XM_011544135	.	.	NP_036221	XP_011542437, XP_011542438	protein_coding	ENSG00000135776	23456	41
ABCB11	.	.	.	.	.	.	0	0.0175385	0	0	0	0	0	0	0	0	0	0	ATP binding cassette subfamily B member 11 [Source:HGNC Symbol;Acc:HGNC:42]	chr2:169779447-169887832	NM_003742	XM_011512079, XM_011512078, XM_011512077, XM_006712817	.	.	NP_003733	XP_006712880, XP_011510379, XP_011510380, XP_016860654	protein_coding	ENSG00000073734	8647	42
ABCB4	.	.	.	.	.	.	0.014981	0.0156456	0	7.13766	12.9805	12.8774	6.93909	7.70681	10.1642	10.7179	6.99828	7.27704	ATP binding cassette subfamily B member 4 [Source:HGNC Symbol;Acc:HGNC:45]	chr7:87031360-87105055	NM_000443, NM_018849, NM_018850	XM_011516314, XM_011516313, XM_011516312, XM_011516311, XM_011516310, XM_011516309, XM_011516308	.	.	NP_000434, NP_061337, NP_061338	XP_011514610, XP_011514611, XP_011514612, XP_011514613, XP_011514614, XP_011514615, XP_016867812	protein_coding	ENSG00000005471	5244	45
ABCB5	.	.	.	.	.	.	0	0	0	0	0	0	0	0	0	0	0	0	ATP binding cassette subfamily B member 5 [Source:HGNC Symbol;Acc:HGNC:46]	chr7:20654829-20796632	NM_001163941, NM_001163942, NM_001163993, NM_178559	XM_011515368, XM_011515367	.	.	NP_001157413, NP_001157414, NP_001157465, NP_848654	XP_011513669, XP_011513670	protein_coding	ENSG00000004846	340273	46
ABCB6	.	.	.	.	.	.	12.2062	16.4401	12.6427	50.174	47.2837	44.3794	30.5369	29.3145	38.7452	40.0146	49.1726	51.1753	ATP binding cassette subfamily B member 6 (Langereis blood group) [Source:HGNC Symbol;Acc:HGNC:47]	chr2:220074489-220083712	NM_005689	.	.	.	NP_005680	.	protein_coding	ENSG00000115657	10058	47
ABCB7	.	.	.	.	.	.	11.2292	13.9834	13.0018	12.4113	13.8052	13.2636	11.1723	13.1535	12.8745	11.8133	11.8088	13.0138	ATP binding cassette subfamily B member 7 [Source:HGNC Symbol;Acc:HGNC:48]	chrX:74273006-74376175	NM_001271696, NM_001271697, NM_001271698, NM_001271699, NM_004299	.	.	.	NP_001258625, NP_001258626, NP_001258627, NP_001258628, NP_004290	.	protein_coding	ENSG00000131269	22	48
ABCB8	◎	.	.	.	.	◎	37.3068	25.2797	28.6347	6.15566	6.30861	4.69248	11.9237	11.9798	6.01293	6.60036	5.99198	6.31933	ATP binding cassette subfamily B member 8 [Source:HGNC Symbol;Acc:HGNC:49]	chr7:150725508-150744869	NM_001282291, NM_001282292, NM_001282293, NM_007188	.	.	.	NP_001269220, NP_001269221, NP_001269222, NP_009119	.	protein_coding	ENSG00000197150	11194	49
ABCB9	.	.	.	.	.	.	8.63061	5.10439	5.03734	3.93385	3.54706	3.08923	2.69337	2.41904	2.76954	3.49294	4.10437	3.76334	ATP binding cassette subfamily B member 9 [Source:HGNC Symbol;Acc:HGNC:50]	chr12:123405497-123467460	NM_001243013, NM_001243014, NM_019624, NM_019625, NM_203444	XM_017019103, XM_011538098, XM_011538097, XM_011538096, XM_011538095, XM_005253558	.	.	NP_001229942, NP_001229943, NP_062570, NP_062571, NP_982269	XP_005253615, XP_011536397, XP_011536398, XP_011536400, XP_016874592	protein_coding	ENSG00000150967	23457	50
ABCC1	.	.	.	.	.	.	25.9711	18.8275	20.7611	11.8761	13.221	12.8428	21.985	22.0428	15.5253	16.2701	12.086	11.6662	ATP binding cassette subfamily C member 1 [Source:HGNC Symbol;Acc:HGNC:51]	chr16:16043433-16236931	NM_004996	XM_017023237, XM_011522498, XM_011522497	.	.	NP_004987	XP_011520799, XP_011520800, XP_016878726	protein_coding	ENSG00000103222	4363	51
ABCC10	.	.	.	.	.	.	12.9268	3.9801	6.10385	11.2946	9.22764	8.84713	9.92051	10.9742	9.31472	9.12438	10.8667	11.7225	ATP binding cassette subfamily C member 10 [Source:HGNC Symbol;Acc:HGNC:52]	chr6:43395291-43424370	NM_001198934, NM_033450	XM_017011452, XM_017011450, XM_017011448, XM_017011447, XM_017011446, XM_017011445, XM_011514983, XM_011514982, XM_011514979, XM_011514978, XM_011514977, XM_011514976, XM_011514975, XM_011514974	.	.	NP_001185863, NP_258261	XP_011513276, XP_011513277, XP_011513285, XP_016866934, XP_016866935, XP_016866936, XP_016866937, XP_016866938, XP_016866939, XP_016866940, XP_016866941	protein_coding	ENSG00000124574	89845	52
ABCC11	.	.	.	.	.	.	0.161025	0.0385531	0.0381845	0.666593	0.813845	0.967317	0.168955	0.242296	0.509157	0.509122	0.753447	0.579739	ATP binding cassette subfamily C member 11 [Source:HGNC Symbol;Acc:HGNC:14639]	chr16:48200820-48391260	NM_032583, NM_033151, NM_145186	XM_017023800, XM_017023799, XM_017023798, XM_017023797, XM_017023796, XM_011523397, XM_011523396	.	.	NP_115972, NP_149163, NP_660187	XP_011521699, XP_016879284, XP_016879285, XP_016879286, XP_016879287, XP_016879288, XP_016879289	protein_coding	ENSG00000121270	85320	14639
ABCC12	.	.	.	.	.	.	0	0.00593896	0	0	0	0	0	0	0	0	0	0	ATP binding cassette subfamily C member 12 [Source:HGNC Symbol;Acc:HGNC:14640]	chr16:48116883-48180681	NM_033226	.	.	.	NP_150229	.	protein_coding	ENSG00000140798	94160	14640
ABCC2	.	.	.	.	.	.	0.361453	5.19307	0.386644	134.335	108.088	115.248	134.259	141.935	103.699	107.217	134.516	134.154	ATP binding cassette subfamily C member 2 [Source:HGNC Symbol;Acc:HGNC:53]	chr10:101542488-101611949	NM_000392	.	.	.	NP_000383	.	protein_coding	ENSG00000023839	1244	53
ABCC3	.	.	.	.	.	.	9.66531	6.9304	11.0168	19.0352	13.1941	15.2853	24.1932	25.7988	16.8399	14.406	19.0896	18.9808	ATP binding cassette subfamily C member 3 [Source:HGNC Symbol;Acc:HGNC:54]	chr17:48712137-48769613	NM_001144070, NM_003786	XM_011525425, XM_011525423, XM_011525422, XM_005257763	.	.	NP_001137542, NP_003777	XP_005257820, XP_011523724, XP_011523725, XP_011523727	protein_coding	ENSG00000108846	8714	54
ABCC4	.	.	.	.	.	.	3.75909	2.54503	4.2754	5.22389	5.36534	5.95353	7.29918	7.33857	6.10751	6.11389	4.94004	5.50774	ATP binding cassette subfamily C member 4 [Source:HGNC Symbol;Acc:HGNC:55]	chr13:95672082-95953700	NM_001105515, NM_001301829, NM_001301830, NM_005845	XM_017020319, XM_011521047, XM_006719914, XM_005254025	.	.	NP_001098985, NP_001288758, NP_001288759, NP_005836	XP_005254082, XP_016875808, XP_016875809, XP_016875811	protein_coding	ENSG00000125257	10257	55
ABCC5	.	.	.	.	.	.	21.7309	32.0325	16.1046	8.44685	6.59446	6.22141	8.64234	9.59978	7.52354	8.09379	8.50447	8.38923	ATP binding cassette subfamily C member 5 [Source:HGNC Symbol;Acc:HGNC:56]	chr3:183637721-183735803	NM_001023587, NM_001320032, NM_005688	XM_017005494, XM_011512316, XM_011512315, XM_011512314, XM_005247059, XM_005247058	.	.	NP_001018881, NP_001306961, NP_005679	XP_005247115, XP_005247116, XP_011510616, XP_011510617, XP_016860982, XP_016860983	protein_coding	ENSG00000114770	10057	56
ABCC6	◎	.	.	◎	.	◎	0.706005	0.147404	0.19833	66.3808	45.6747	45.0754	13.7331	15.6576	34.4025	33.5197	66.1974	66.5642	ATP binding cassette subfamily C member 6 [Source:HGNC Symbol;Acc:HGNC:57]	chr16:16242784-16317328	NM_001079528, NM_001171	XM_011522482, XM_011522481, XM_011522480, XM_011522479	.	.	NP_001072996	XP_011520781, XP_011520782, XP_011520783, XP_011520784, XP_016878702	protein_coding	ENSG00000091262	105369239	57
ABCC8	.	.	.	.	.	.	0	0.00537137	0	0	0	0	0	0	0	0	0	0	ATP binding cassette subfamily C member 8 [Source:HGNC Symbol;Acc:HGNC:59]	chr11:17414431-17498392	NM_000352, NM_001287174	XM_017018200, XM_011520332, XM_011520331	.	.	NP_000343, NP_001274103	XP_011518633, XP_016873686, XP_016873687, XP_016873688, XP_016873689, XP_016873690	protein_coding	ENSG00000006071	6833	59
ABCC9	.	.	.	.	.	.	0.294451	1.60653	0.316692	0	0	0	0	0	0	0	0	0	ATP binding cassette subfamily C member 9 [Source:HGNC Symbol;Acc:HGNC:60]	chr12:21950334-22095463	NM_005691, NM_020297	XM_011520545, XM_006719025, XM_005253290, XM_005253289, XM_005253288, XM_005253287, XM_005253286, XM_005253284	.	.	NP_005682, NP_064693	XP_005253341, XP_005253343, XP_005253344, XP_005253345, XP_005253346, XP_005253347, XP_006719088, XP_011518847	protein_coding	ENSG00000069431	10060	60
ABCD1	.	.	.	.	.	.	5.42964	9.07702	8.6867	18.022	18.5862	17.7379	16.8753	16.4832	20.4645	19.0068	18.1201	17.9239	ATP binding cassette subfamily D member 1 [Source:HGNC Symbol;Acc:HGNC:61]	chrX:152990322-153010216	NM_000033	.	.	.	NP_000024	.	protein_coding	ENSG00000101986	215	61
ABCD2	.	.	.	.	.	.	0.00580737	0	0.00614125	0	0	0	0	0	0	0	0	0	ATP binding cassette subfamily D member 2 [Source:HGNC Symbol;Acc:HGNC:66]	chr12:39943834-40013553	NM_005164	XM_011538027	.	.	NP_005155	XP_011536329, XP_016874481	protein_coding	ENSG00000173208	225	66
ABCD3	.	.	.	.	.	.	16.8937	30.3038	23.4725	62.2817	50.3002	50.7679	34.9462	32.7557	46.6947	47.2478	61.956	62.6074	ATP binding cassette subfamily D member 3 [Source:HGNC Symbol;Acc:HGNC:67]	chr1:94884010-94984219	NM_001122674, NM_002858	XM_017001954, XM_017001953, XM_006710802, XM_005271089	.	.	NP_001116146, NP_002849	XP_006710865, XP_016857442, XP_016857443	protein_coding	ENSG00000117528	5825	67
ABCD4	.	.	.	.	.	.	10.9434	5.96861	6.97675	15.1336	13.6923	13.9626	14.4987	12.6357	13.9589	13.2185	15.121	15.1462	ATP binding cassette subfamily D member 4 [Source:HGNC Symbol;Acc:HGNC:68]	chr14:74752125-74769759	NM_005050	XM_011537042, XM_011537041, XM_006720223, XM_005267949, XM_005267946, XM_005267942, XM_005267941, XM_005267940, XM_005267939	.	.	NP_005041	XP_005267996, XP_005267997, XP_005267998, XP_005267999, XP_005268003, XP_005268006, XP_006720286, XP_011535343	protein_coding	ENSG00000119688	5826	68
ABCE1	.	.	.	.	.	.	41.0586	39.0173	47.8221	27.6369	38.754	39.5741	53.2131	54.1139	40.8518	45.2406	27.939	27.3348	ATP binding cassette subfamily E member 1 [Source:HGNC Symbol;Acc:HGNC:69]	chr4:145915726-146050331	NM_001040876, NM_002940	.	.	.	NP_001035809, NP_002931	.	protein_coding	ENSG00000164163	6059	69
ABCF1	.	.	.	.	.	.	50.9188	59.0993	47.1356	30.4206	30.8386	28.8733	41.0463	43.4587	34.9775	33.2707	29.8046	31.0365	ATP binding cassette subfamily F member 1 [Source:HGNC Symbol;Acc:HGNC:70]	chr6:30539152-30559309	NM_001025091, NM_001090	.	.	.	NP_001020262, NP_001081	.	protein_coding	ENSG00000204574	23	70
ABCF2	.	.	.	.	.	.	50.5843	35.9491	37.7642	14.252	14.582	13.8517	21.4019	22.1716	17.9161	18.1347	14.3328	14.1712	ATP binding cassette subfamily F member 2 [Source:HGNC Symbol;Acc:HGNC:71]	chr7:150904922-150924316	NM_005692, NM_007189	XM_006715824, XM_005249931	.	.	NP_005683, NP_009120	XP_005249988, XP_006715887, XP_016867128, XP_016867129	protein_coding	ENSG00000033050	10061	71
ABCF3	.	.	.	.	.	.	36.2443	33.1981	24.8652	16.8689	13.8843	14.8912	16.2984	17.3144	16.2355	13.7176	17.3216	16.4163	ATP binding cassette subfamily F member 3 [Source:HGNC Symbol;Acc:HGNC:72]	chr3:183903810-183911795	NM_018358	XM_011512959	.	.	NP_060828	XP_011511261	protein_coding	ENSG00000161204	55324	72
ABCG1	.	.	.	.	.	.	7.4696	7.76047	33.1463	0.0140088	0	0	0	0	0	0	0.0280176	0	ATP binding cassette subfamily G member 1 [Source:HGNC Symbol;Acc:HGNC:73]	chr21:43619798-43717354	NM_004915, NM_016818, NM_207174, NM_207627, NM_207628, NM_207629	XM_011529807, XM_011529806	.	.	NP_004906, NP_058198, NP_997057, NP_997510, NP_997511, NP_997512	XP_011528108, XP_011528109	protein_coding	ENSG00000160179	9619	73
ABCG2	.	.	.	.	.	.	1.72725	1.28834	2.83289	2.49679	4.06139	4.22744	5.27131	6.25251	4.50538	5.4563	2.67004	2.32354	ATP binding cassette subfamily G member 2 (Junior blood group) [Source:HGNC Symbol;Acc:HGNC:74]	chr4:89011415-89152474	NM_001257386, NM_004827	XM_011532420, XM_005263356, XM_005263355, XM_005263354	.	.	NP_001244315, NP_004818	XP_005263411, XP_005263412, XP_005263413, XP_011530722, XP_016864341, XP_016864342	protein_coding	ENSG00000118777	9429	74
ABCG4	.	.	.	.	.	.	0.198634	0.0899415	0.174263	0	0.0220971	0	0	0.0351169	0	0	0	0	ATP binding cassette subfamily G member 4 [Source:HGNC Symbol;Acc:HGNC:13884]	chr11:119019721-119033362	NM_001142505, NM_022169	XM_011542952	.	.	NP_001135977, NP_071452	XP_011541254	protein_coding	ENSG00000172350	64137	13884
ABCG5	.	.	.	.	.	.	0	0	0	15.9987	12.5731	12.4043	13.0621	12.5839	13.798	13.6997	16.4939	15.5036	ATP binding cassette subfamily G member 5 [Source:HGNC Symbol;Acc:HGNC:13886]	chr2:44039610-44065958	NM_022436	XM_011533026, XM_011533025, XM_011533024, XM_006712073, XM_005264480	.	.	NP_071881	XP_005264537, XP_006712136, XP_011531326, XP_011531327, XP_011531328	protein_coding	ENSG00000138075	64240	13886
ABCG8	.	.	.	.	.	.	0	0	0	12.3675	6.77009	6.8325	3.56183	3.41033	5.41461	5.60601	12.5313	12.2037	ATP binding cassette subfamily G member 8 [Source:HGNC Symbol;Acc:HGNC:13887]	chr2:44066102-44105605	NM_022437	XM_011533031, XM_011533030, XM_011533029, XM_005264483	.	.	NP_071882	XP_005264540, XP_011531331, XP_011531332	protein_coding	ENSG00000143921	64241	13887
ABHD1	.	.	.	.	.	.	0.0392109	0	0	0.048772	0.0906478	0	0	0	0.0923278	0.163019	0.097544	0	abhydrolase domain containing 1 [Source:HGNC Symbol;Acc:HGNC:17553]	chr2:27346656-27357543	NM_032604	XM_011533138, XM_011533137, XM_011533136, XM_011533135	.	.	NP_115993	XP_011531437, XP_011531438, XP_011531439, XP_011531440	protein_coding	ENSG00000143994	84696	17553
ABHD10	.	.	.	.	.	.	16.8089	12.7751	12.6721	12.6547	15.3697	15.0785	15.9526	15.9775	17.3422	14.7509	12.9183	12.3912	abhydrolase domain containing 10 [Source:HGNC Symbol;Acc:HGNC:25656]	chr3:111697881-111712210	NM_001272069, NM_018394	XM_011512960	.	.	NP_001258998, NP_060864	XP_011511262	protein_coding	ENSG00000144827	55347	25656
ABHD11	.	.	.	.	.	.	14.5956	10.7102	11.0332	2.78379	2.51808	1.75773	1.69144	1.28624	1.70429	2.44952	2.55716	3.01042	abhydrolase domain containing 11 [Source:HGNC Symbol;Acc:HGNC:16407]	chr7:73150423-73153197	NM_001145364, NM_001301058, NM_001321382, NM_148912, NM_148913	XM_011516590, XM_006716143	NR_026912	.	NP_001138836, NP_001287987, NP_001308311, NP_001308312, NP_683710, NP_683711	XP_011514892	protein_coding	ENSG00000106077	83451	16407
ABHD12	.	.	.	.	.	.	51.0962	43.398	41.1696	54.7047	39.6532	41.9123	34.1192	33.347	36.4101	34.6234	53.7719	55.6375	abhydrolase domain containing 12 [Source:HGNC Symbol;Acc:HGNC:15868]	chr20:25228704-25371619	NM_001042472, NM_015600	XM_011529218, XM_011529217, XM_011529216, XM_011529215, XM_011529214, XM_005260700, XM_005260699	.	.	NP_001035937, NP_056415	XP_011527516, XP_011527517, XP_011527520, XP_016883287	protein_coding	ENSG00000100997	26090	15868
ABHD12B	.	.	.	.	.	.	0.0441876	0.32861	0.818394	0	0	0	0	0	0	0	0	0	abhydrolase domain containing 12B [Source:HGNC Symbol;Acc:HGNC:19837]	chr14:51324608-51411454	NM_001206673, NM_181533, NM_181814	XM_011536474, XM_005267356	.	.	NP_001193602, NP_853511, NP_861535	XP_011534776	protein_coding	ENSG00000131969	145447	19837
ABHD13	.	.	.	.	.	.	1.9576	4.08075	3.39045	5.25358	6.25838	6.00617	9.45389	9.42057	7.67454	7.79834	5.15686	5.35029	abhydrolase domain containing 13 [Source:HGNC Symbol;Acc:HGNC:20293]	chr13:108870726-108886603	NM_032859	XM_011521128	.	.	NP_116248	XP_011519430	protein_coding	ENSG00000139826	84945	20293
ABHD14A	.	.	.	.	.	.	8.80245	2.31401	6.36752	20.1618	22.4198	22.1863	12.0918	11.1184	20.3275	19.0472	22.0106	18.3131	abhydrolase domain containing 14A [Source:HGNC Symbol;Acc:HGNC:24538]	chr3:52002525-52023218	NM_015407	.	.	.	NP_056222	.	protein_coding	ENSG00000248487	25864	24538
ABHD14A-ACY1	.	.	.	.	.	.	0.000321599	1.52353e-06	0.0498103	0.439727	4.11437e-18	3.93378e-11	2.30884e-23	2.9267e-05	1.35231e-12	5.27995e-11	7.10209e-10	0.879455	ABHD14A-ACY1 readthrough [Source:HGNC Symbol;Acc:HGNC:38856]	chr3:52002525-52023218	NM_001316331	.	.	.	NP_001303260	.	protein_coding	ENSG00000114786	100526760	38856
ABHD14B	.	.	.	.	.	.	21.2846	5.21664	9.1405	40.654	45.4224	43.3292	27.4282	29.7796	39.3563	36.6469	40.6745	40.6335	abhydrolase domain containing 14B [Source:HGNC Symbol;Acc:HGNC:28235]	chr3:52002525-52023218	NM_001146314, NM_032750	XM_011534162	.	.	NP_001139786, NP_116139	XP_011532464	protein_coding	ENSG00000114779	84836	28235
ABHD15	.	.	.	.	.	.	7.38084	9.27878	7.17893	7.82651	4.39028	4.63947	2.69139	2.54721	4.21379	4.89704	7.74126	7.91176	abhydrolase domain containing 15 [Source:HGNC Symbol;Acc:HGNC:26971]	chr17:27887564-27894155	NM_198147	.	.	.	NP_937790	.	protein_coding	ENSG00000168792	116236	26971
ABHD16A	.	.	.	.	.	.	19.4037	15.4984	12.2736	22.317	17.6543	18.9313	19.5843	20.0228	18.4131	19.7733	22.0065	22.6276	abhydrolase domain containing 16A [Source:HGNC Symbol;Acc:HGNC:13921]	chr6:31654725-31685695	NM_001177515, NM_021160	.	.	.	NP_001170986, NP_066983	.	protein_coding	ENSG00000204427	7920	13921
ABHD16B	.	.	.	.	.	.	0.037092	0.0386883	0	0	0	0	0	0	0	0	0	0	abhydrolase domain containing 16B [Source:HGNC Symbol;Acc:HGNC:16128]	chr20:62492850-62494341	NM_080622	.	.	.	NP_542189	.	protein_coding	ENSG00000183260	140701	16128
ABHD17A	.	.	.	.	.	.	25.5082	13.714	20.9132	41.8301	41.2723	40.1636	30.4534	30.2548	35.1469	32.3886	39.4761	44.1841	abhydrolase domain containing 17A [Source:HGNC Symbol;Acc:HGNC:28756]	chr19:1876808-1885546	NM_001130111, NM_031213	XM_011528338	.	.	NP_001123583, NP_112490	XP_011526640, XP_016882830	protein_coding	ENSG00000129968	81926	28756
ABHD17B	.	.	.	.	.	.	6.93813	11.885	8.10902	10.7349	10.8332	11.0454	10.031	8.78717	9.4551	9.52732	11.6722	9.79754	abhydrolase domain containing 17B [Source:HGNC Symbol;Acc:HGNC:24278]	chr9:74477367-74525847	NM_001025780, NM_016014	XM_017014789, XM_011518759, XM_006717134	.	.	NP_001020951, NP_057098	XP_006717197, XP_011517061, XP_016870276, XP_016870277, XP_016870278	protein_coding	ENSG00000107362	51104	24278
ABHD17C	.	.	.	.	.	.	25.8523	15.1535	40.3123	4.62932	4.77445	5.29198	5.03363	5.20433	5.34772	7.39721	4.39195	4.86669	abhydrolase domain containing 17C [Source:HGNC Symbol;Acc:HGNC:26925]	chr15:80972024-81047962	NM_021214	.	.	.	NP_067037	.	protein_coding	ENSG00000136379	58489	26925
ABHD18	.	.	.	.	.	.	3.19019	5.58434	3.55578	5.82541	4.01502	5.31935	6.48598	6.85599	4.85993	5.82365	5.30032	6.35051	abhydrolase domain containing 18 [Source:HGNC Symbol;Acc:HGNC:26111]	chr4:128838959-128960866	NM_001039717, NM_001319305, NM_001319306	XM_011532278, XM_011532277, XM_011532276, XM_011532275, XM_011532274, XM_011532273, XM_006714322, XM_006714321, XM_006714318, XM_005263242, XM_005263238	.	.	NP_001034806, NP_001306234, NP_001306235	XP_005263295, XP_006714381, XP_006714385, XP_011530575, XP_011530576, XP_011530578, XP_011530579, XP_011530580, XP_016864120	protein_coding	ENSG00000164074	80167	26111
ABHD2	.	.	.	.	.	.	10.844	23.4914	20.1681	14.2873	8.62651	8.03379	10.3505	9.44162	7.2245	8.25436	14.2839	14.2907	abhydrolase domain containing 2 [Source:HGNC Symbol;Acc:HGNC:18717]	chr15:89631380-89745591	NM_007011, NM_152924	XM_011521165, XM_005254833, XM_005254832	.	.	NP_008942, NP_690888	XP_005254889, XP_005254890, XP_011519467	protein_coding	ENSG00000140526	11057	18717
ABHD3	.	.	.	.	.	.	11.0662	62.3636	24.4806	34.5354	31.5356	31.6114	24.1044	23.1874	32.1295	29.795	33.6265	35.4443	abhydrolase domain containing 3 [Source:HGNC Symbol;Acc:HGNC:18718]	chr18:19230857-19284766	NM_001308256, NM_001308257, NM_138340	XM_011525849, XM_011525848	.	.	NP_001295185, NP_001295186, NP_612213	XP_011524150, XP_011524151, XP_016881060, XP_016881061, XP_016881062, XP_016881063	protein_coding	ENSG00000158201	171586	18718
ABHD4	◎	.	.	◎	.	◎	22.0541	108.602	19.4933	16.5254	12.2978	12.3255	30.1819	32.4853	11.4313	11.0869	15.5018	17.549	abhydrolase domain containing 4 [Source:HGNC Symbol;Acc:HGNC:20154]	chr14:23067145-23082121	NM_022060	.	.	.	NP_071343	XP_005268043	protein_coding	ENSG00000100439	63874	20154
ABHD5	◎	.	.	◎	.	◎	8.23993	29.4438	12.8442	3.27487	2.42855	3.70269	6.2704	7.04869	3.14272	3.27927	3.25452	3.29522	abhydrolase domain containing 5 [Source:HGNC Symbol;Acc:HGNC:21396]	chr3:43732361-43760541	NM_016006	XM_011533780	.	.	NP_057090	XP_011532082	protein_coding	ENSG00000011198	51099	21396
ABHD6	.	.	.	.	.	.	1.07769	1.17539	1.43387	3.77252	3.7588	3.93775	2.60255	3.22147	4.12934	4.26117	3.57007	3.97498	abhydrolase domain containing 6 [Source:HGNC Symbol;Acc:HGNC:21398]	chr3:58223232-58280461	NM_001320126, NM_020676	XM_005265336, XM_005265335, XM_005265334	.	.	NP_001307055, NP_065727	XP_005265391, XP_005265392, XP_005265393, XP_016862419	protein_coding	ENSG00000163686	57406	21398
ABHD8	.	.	.	.	.	.	22.7733	33.5305	31.4323	11.7701	9.049	8.92619	8.51108	7.68817	8.38605	8.87978	12.3961	11.1441	abhydrolase domain containing 8 [Source:HGNC Symbol;Acc:HGNC:23759]	chr19:17402939-17417652	NM_024527	.	.	.	NP_078803	.	protein_coding	ENSG00000127220	79575	23759
ABI1	.	.	.	.	.	.	23.8008	46.3595	42.5297	13.3524	10.9867	12.7733	13.5207	13.8533	12.1605	13.1643	13.7566	12.9481	abl interactor 1 [Source:HGNC Symbol;Acc:HGNC:11320]	chr10:26986587-27150016	NM_001012750, NM_001012751, NM_001012752, NM_001178116, NM_001178119, NM_001178120, NM_001178121, NM_001178122, NM_001178123, NM_001178124, NM_001178125, NM_005470	XM_006717361, XM_006717360, XM_006717359, XM_005252333, XM_005252332	.	.	NP_001012768, NP_001012769, NP_001012770, NP_001171587, NP_001171590, NP_001171591, NP_001171592, NP_001171593, NP_001171594, NP_001171595, NP_001171596, NP_005461	XP_005252389, XP_005252390, XP_006717422, XP_006717423, XP_006717424, XP_016870947	protein_coding	ENSG00000136754	10006	11320
ABI2	.	.	.	.	.	.	8.50021	12.7956	10.6642	13.3837	13.5529	13.1269	13.8472	14.7404	12.4537	13.491	13.302	13.4655	abl interactor 2 [Source:HGNC Symbol;Acc:HGNC:24011]	chr2:204192941-204400133	NM_001282925, NM_001282926, NM_001282927, NM_001282932, NM_005759	XM_017003126, XM_017003125, XM_011510472, XM_006712186, XM_006712185, XM_006712182, XM_006712181, XM_006712180, XM_006712179, XM_006712174, XM_005246226, XM_005246225, XM_005246222, XM_005246221, XM_005246218, XM_005246217	.	.	NP_001269854, NP_001269855, NP_001269856, NP_001269861, NP_005750	XP_005246274, XP_005246275, XP_005246278, XP_005246282, XP_005246283, XP_006712237, XP_006712242, XP_006712243, XP_006712244, XP_006712245, XP_006712248, XP_006712249, XP_011508774, XP_016858607, XP_016858608, XP_016858610, XP_016858611, XP_016858612, XP_016858613, XP_016858614, XP_016858615, XP_016858616, XP_016858618, XP_016858619, XP_016858620, XP_016858624	protein_coding	ENSG00000138443	10152	24011
ABI3	.	.	.	.	.	.	0.0208524	0.0522886	0	0	0	0	0	0	0	0	0	0	ABI family member 3 [Source:HGNC Symbol;Acc:HGNC:29859]	chr17:47280152-47300587	NM_001135186, NM_016428	XM_011524873, XM_005257429	.	.	NP_001128658, NP_057512	XP_005257486, XP_011523175, XP_016880210	protein_coding	ENSG00000108798	51225	29859
ABI3BP	.	.	.	.	.	.	0.0264391	0.038162	0	0	0	0	0	0	0	0	0	0	ABI family member 3 binding protein [Source:HGNC Symbol;Acc:HGNC:17265]	chr3:100467999-100712359	NM_015429	XM_011512660, XM_011512659, XM_011512658, XM_011512657, XM_011512656, XM_011512655, XM_011512654, XM_011512653, XM_011512652, XM_011512651, XM_011512650, XM_011512649, XM_011512648, XM_011512647, XM_011512646, XM_011512645, XM_011512644, XM_011512643, XM_011512642, XM_011512641, XM_011512640, XM_011512639, XM_006713572, XM_006713571, XM_006713570, XM_006713569, XM_006713568, XM_005247309, XM_0052…	.	.	NP_056244	XP_005247338, XP_005247339, XP_005247340, XP_005247341, XP_005247342, XP_005247344, XP_005247345, XP_005247346, XP_005247347, XP_005247348, XP_005247350, XP_005247351, XP_005247352, XP_005247353, XP_005247355, XP_005247356, XP_005247357, XP_005247358, XP_005247359, XP_005247360, XP_005247362, XP_005247363, XP_005247366, XP_006713632, XP_006713633, XP_006713634, XP_006713635, XP_011510941, XP_0115…	protein_coding	ENSG00000154175	25890	17265
ABL1	.	.	.	.	.	.	50.8307	46.0911	40.7848	16.2227	12.7024	12.9691	15.9917	17.3627	13.599	12.9024	15.8058	16.6397	ABL proto-oncogene 1, non-receptor tyrosine kinase [Source:HGNC Symbol;Acc:HGNC:76]	chr9:133589332-133763062	NM_005157, NM_007313	.	.	.	NP_005148, NP_009297	.	protein_coding	ENSG00000097007	25	76
ABL2	.	.	.	.	.	.	6.27687	30.8396	14.4769	4.92273	4.16807	4.22337	4.08069	4.70999	4.15904	4.68938	4.78216	5.0633	ABL proto-oncogene 2, non-receptor tyrosine kinase [Source:HGNC Symbol;Acc:HGNC:77]	chr1:179068461-179198819	NM_001136000, NM_001136001, NM_001168236, NM_001168237, NM_001168238, NM_001168239, NM_005158, NM_007314	XM_005245088	.	.	NP_001129472, NP_001129473, NP_001161708, NP_001161709, NP_001161710, NP_001161711, NP_005149, NP_009298	XP_005245145, XP_016856524	protein_coding	ENSG00000143322	27	77
ABLIM1	.	.	.	.	.	.	17.8961	22.9004	28.2242	20.6063	38.4341	38.9946	44.7051	46.8157	47.407	47.2838	21.351	19.8615	actin binding LIM protein 1 [Source:HGNC Symbol;Acc:HGNC:78]	chr10:116190871-116444762	NM_001003407, NM_001003408, NM_001322882, NM_001322890, NM_001322891, NM_001322892, NM_001322893, NM_001322896, NM_002313, NM_006720	XM_017016255, XM_017016247, XM_017016244, XM_017016243, XM_011539806, XM_011539805, XM_011539804, XM_011539803, XM_011539802, XM_011539801, XM_006717848, XM_006717847, XM_006717846, XM_006717838, XM_006717837, XM_005269830, XM_005269828, XM_005269827, XM_005269826, XM_005269824, XM_005269818	.	.	NP_001003407, NP_001003408, NP_001309811, NP_001309819, NP_001309820, NP_001309821, NP_001309822, NP_001309825, NP_002304, NP_006711	XP_005269875, XP_005269881, XP_005269883, XP_005269884, XP_006717900, XP_006717909, XP_006717910, XP_011538103, XP_011538104, XP_011538105, XP_011538107, XP_016871732, XP_016871733, XP_016871736, XP_016871744	protein_coding	ENSG00000099204	3983	78
ABLIM2	.	.	.	.	.	.	18.5073	9.10601	19.4342	0.0830452	0	0	0.0316254	0.0436951	0.144043	0.0574634	0.0730258	0.0930645	actin binding LIM protein family member 2 [Source:HGNC Symbol;Acc:HGNC:19195]	chr4:7967038-8160559	NM_001130083, NM_001130084, NM_001130085, NM_001130086, NM_001130087, NM_001130088, NM_001286688, NM_032432	XM_017008724, XM_011513589, XM_011513584, XM_011513583, XM_011513580, XM_011513579, XM_006713927, XM_006713924, XM_005248031, XM_005248030, XM_005248029, XM_005248028, XM_005248027, XM_005248024, XM_005248023, XM_005248022, XM_005248020, XM_005248019, XM_005248018, XM_005248014	.	.	NP_001123555, NP_001123556, NP_001123557, NP_001123558, NP_001123559, NP_001123560, NP_001273617, NP_115808	XP_005248071, XP_005248075, XP_005248076, XP_005248077, XP_005248079, XP_005248080, XP_005248081, XP_005248084, XP_005248085, XP_005248086, XP_005248087, XP_005248088, XP_006713987, XP_006713990, XP_016864199, XP_016864205, XP_016864206, XP_016864207, XP_016864208, XP_016864209, XP_016864210, XP_016864211, XP_016864213	protein_coding	ENSG00000163995	84448	19195
ABLIM3	◎	.	.	◎	.	◎	16.7136	19.9961	18.2682	0.204148	0.369681	0.327891	1.82017	2.20188	0.639401	0.361377	0.209697	0.198599	actin binding LIM protein family member 3 [Source:HGNC Symbol;Acc:HGNC:29132]	chr5:148521045-148640105	NM_001301015, NM_001301018, NM_001301027, NM_001301028, NM_014945	XM_017009238, XM_005268396, XM_005268395, XM_005268394, XM_005268393, XM_005268392	.	.	NP_001287944, NP_001287947, NP_001287956, NP_001287957, NP_055760	XP_005268449, XP_005268450, XP_005268451, XP_005268452, XP_005268453, XP_016864727	protein_coding	ENSG00000173210	22885	29132
ABO	.	.	.	.	.	.	1.29015	0.259792	0.310506	0	0	0	0	0	0	0	0	0	ABO blood group (transferase A, alpha 1-3-N-acetylgalactosaminyltransferase; transferase B, alpha 1-3-galactosyltransferase) [Source:HGNC Symbol;Acc:HGNC:79]	chr9:136130562-136150630	NM_020469	.	.	.	NP_065202	.	protein_coding	ENSG00000175164	28	79
ABR	.	.	.	.	.	.	23.4737	23.9886	24.7669	5.7093	6.37226	6.6737	11.5299	12.1793	8.15572	8.37984	5.68941	5.7292	active BCR-related [Source:HGNC Symbol;Acc:HGNC:81]	chr17:900356-1090616	NM_001092, NM_001159746, NM_001256847, NM_001282149, NM_001322840, NM_021962	XM_011523815, XM_011523814, XM_011523813, XM_011523812, XM_011523810	.	.	NP_001083, NP_001153218, NP_001243776, NP_001269078, NP_001309769, NP_068781	XP_011522112, XP_011522114, XP_011522115, XP_011522116, XP_011522117, XP_016880031, XP_016880032	protein_coding	ENSG00000159842	29	81
ABRA	.	.	.	.	.	.	0	0.0105342	0	0	0	0	0	0	0	0	0	0	actin binding Rho activating protein [Source:HGNC Symbol;Acc:HGNC:30655]	chr8:107771710-107782473	NM_139166	.	.	.	NP_631905	.	protein_coding	ENSG00000174429	137735	30655
ABRACL	.	.	.	.	.	.	71.8379	106.091	80.645	3.64191	3.90203	3.45681	6.07667	6.13115	4.04482	4.95935	3.3023	3.98152	ABRA C-terminal like [Source:HGNC Symbol;Acc:HGNC:21230]	chr6:139349818-139364439	NM_021243	.	.	.	NP_067066	XP_016866640	protein_coding	ENSG00000146386	58527	21230
ABT1	.	.	.	.	.	.	32.6844	25.165	23.8569	24.3861	30.072	30.8262	28.8699	29.1735	31.9035	28.7626	23.3098	25.4623	activator of basal transcription 1 [Source:HGNC Symbol;Acc:HGNC:17369]	chr6:26597179-26600972	NM_013375	.	.	.	NP_037507	.	protein_coding	ENSG00000146109	29777	17369
ABTB1	.	.	.	.	.	.	4.62307	7.0285	8.26316	2.59727	1.50361	1.43181	2.53452	3.25403	2.83578	2.5385	2.95684	2.2377	ankyrin repeat and BTB domain containing 1 [Source:HGNC Symbol;Acc:HGNC:18275]	chr3:127391782-127399763	NM_032548, NM_172027	XM_017007287, XM_011513213, XM_011513212, XM_006713772, XM_006713769	.	.	NP_115937, NP_742024	XP_006713832, XP_006713835, XP_011511515, XP_016862776	protein_coding	ENSG00000114626	80325	18275
ABTB2	.	.	.	.	.	.	9.32233	10.2411	15.8324	6.41609	7.06458	6.13972	11.1587	10.3375	8.51969	8.33543	6.39861	6.43358	ankyrin repeat and BTB domain containing 2 [Source:HGNC Symbol;Acc:HGNC:23842]	chr11:34172534-34379555	NM_145804	.	.	.	NP_665803	.	protein_coding	ENSG00000166016	25841	23842
AC000003.2	.	.	.	.	.	.	0	0	0	0	0	0	0	0	0	0	0	0	CDNA FLJ25865 fis, clone CBR01927 [Source:UniProtKB/TrEMBL;Acc:Q8N7A4]	chr17:9813925-10101868	.	.	.	.	.	.	protein_coding	ENSG00000264194	.	.
AC002310.13	.	.	.	.	.	.	0.743298	0.358474	0.0265316	0.787486	5.32722e-32	1.01043	0.166425	0.219582	0.000214171	5.06752e-54	1.57497	1.6158e-11	.	chr16:30541687-30569819	.	.	.	.	.	.	protein_coding	ENSG00000260869	.	.
AC002429.5	.	.	.	.	.	.	0	0	0	0	0	0	0	0	0	0	0	0	.	chr7:94536948-94925727	.	.	.	.	.	.	protein_coding	ENSG00000236197	.	.
AC002451.1	.	.	.	.	.	.	0	0	0	0.0188109	0.0336361	0.0374732	0.110877	0.311535	0.0725399	0.0432657	0.0376217	0	Protein LOC100996577 [Source:UniProtKB/TrEMBL;Acc:M0R3I6]	chr7:95171456-95173854	.	.	.	.	.	.	protein_coding	ENSG00000269449	.	.
AC002472.1	.	.	.	.	.	.	0	0	0	0	0	0	0	0	0	0	0	0	Metazoan signal recognition particle RNA [Source:RFAM;Acc:RF00017]	chr22:21358029-21360736	.	.	.	.	.	.	misc_RNA	ENSG00000269103	.	.
AC003002.4	.	.	.	.	.	.	6.1145e-23	0.000503873	8.96693e-43	4.88908e-151	1.49078e-165	3.98313e-16	2.55277e-86	0.00759339	2.11042e-26	2.2622e-184	0	9.77816e-151	.	chr19:57874878-57988938	.	.	.	.	.	.	protein_coding	ENSG00000268133	.	.
AC003002.6	.	.	.	.	.	.	9.23102e-34	1.82113e-45	8.55401e-40	2.5795e-33	9.4836e-111	2.06485e-100	1.53195e-55	4.91027e-54	5.02883e-46	9.44987e-51	5.159e-33	8.24449e-88	.	chr19:57874878-57988938	.	.	.	.	.	.	protein_coding	ENSG00000269533	.	.
AC003006.7	.	.	.	.	.	.	3.81821e-07	7.68242e-07	2.76519e-09	4.62697e-06	1.00334e-14	0.31588	3.05621e-22	3.32761e-23	1.21099e-12	1.4795e-06	9.25394e-06	2.23317e-25	.	chr19:58193346-58269527	.	.	.	.	.	.	protein_coding	ENSG00000269026	.	.
AC003043.1	.	.	.	.	.	.	0	0	0	0	0	0	0	0	0	0	0	0	.	chr17:42325752-42355825	.	.	.	.	.	.	protein_coding	ENSG00000268413	.	.
AC004017.1	.	.	.	.	.	.	0.327829	0.395156	0	0	0	0	0	0	0	0	0	0	Uncharacterized protein [Source:UniProtKB/TrEMBL;Acc:M0R3E0]	chr19:58193346-58269527	.	.	.	.	.	.	protein_coding	ENSG00000268948	.	.
AC004076.7	.	.	.	.	.	.	2.92321	0.50025	1.95534	4.78867	3.77221	2.8982	2.64925	3.50925	2.59304	3.86515	4.86467	4.71266	.	chr19:57874878-57988938	.	.	.	.	.	.	protein_coding	ENSG00000268533	.	.
AC004076.9	.	.	.	.	.	.	3.4281e-119	3.98552e-12	1.16366e-65	0.280004	0.66307	0.580302	2.38563e-90	1.62835e-117	6.77474e-22	3.95207e-101	0.285112	0.274897	.	chr19:57874878-57988938	.	.	.	.	.	.	protein_coding	ENSG00000268163	.	.
AC004381.6	.	.	.	.	.	.	4.37801	2.4765	2.16167	3.83267	2.97342	3.08594	1.17048	1.00153	2.05934	1.87471	3.99648	3.66886	Putative RNA exonuclease NEF-sp [Source:UniProtKB/Swiss-Prot;Acc:Q96IC2]	chr16:20775023-20936328	NM_001144924, NM_001199053, NM_030941	XM_017023739, XM_011545966, XM_011545965, XM_011545964, XM_011545963, XM_005255604	.	.	NP_001138396, NP_001185982, NP_112203	XP_005255661, XP_011544265, XP_011544266, XP_011544267, XP_011544268, XP_016879228	protein_coding	ENSG00000005189	81691	.
AC004528.1	.	.	.	.	.	.	0	0	0	0	0	0	0	0	0	0	0	0	Uncharacterized protein [Source:UniProtKB/TrEMBL;Acc:M0QY07]	chr19:999600-999952	.	.	.	.	.	.	protein_coding	ENSG00000269169	.	.
AC004754.3	.	.	.	.	.	.	1.09621e-29	3.88993e-42	0.13149	0.0705209	2.24222e-40	3.02733e-86	3.49323e-31	4.05737e-73	5.41048e-64	3.22352e-47	0.141042	2.75347e-53	.	chr16:284544-325929	.	.	.	.	.	.	protein_coding	ENSG00000269881	.	.
AC004817.1	.	.	.	.	.	.	0	0	0	0	0	0	0	0	0	0	0	0	HCG2028611; Uncharacterized protein [Source:UniProtKB/TrEMBL;Acc:M0QX34]	chr14:71683030-71683462	.	.	.	.	.	.	protein_coding	ENSG00000267901	.	.
AC004824.2	.	.	.	.	.	.	0	0	0	0	0	0	0	0	0	0	0	0	Uncharacterized protein [Source:UniProtKB/TrEMBL;Acc:M0QXB7]	chr1:17634689-17690499	.	.	.	.	.	.	protein_coding	ENSG00000269468	.	.
AC004899.1	.	.	.	.	.	.	0	0	0	0	0	0	0	0	0	0	0	0	Uncharacterized protein [Source:UniProtKB/TrEMBL;Acc:M0R023]	chr7:48887361-48891221	.	.	.	.	.	.	protein_coding	ENSG00000267970	.	.
AC005082.1	.	.	.	.	.	.	0	0.492399	0	0	0	0	0	0	0	0	0	0	Uncharacterized protein [Source:UniProtKB/TrEMBL;Acc:H7BYU3]	chr7:23145402-23240628	.	.	.	.	.	.	protein_coding	ENSG00000214871	.	.
AC005281.1	.	.	.	.	.	.	0	0	0	0.174358	0.037227	0	0	0	0	0	0.348716	0	.	chr7:12522969-12580896	.	XM_011515668	NR_136263	.	.	XP_011513970	protein_coding	ENSG00000226690	102725191	.
AC005358.1	.	.	.	.	.	.	0	0	0	0	0	0	0	0	0	0	0	0	.	chr17:12569305-12672266	NM_001146313	.	.	.	NP_001139785	.	protein_coding	ENSG00000273452	.	.
AC005477.1	.	.	.	.	.	.	0	0	0	0	0	0	0	0	0	0	0	0	.	chr14:72399155-73033237	.	.	.	.	.	.	protein_coding	ENSG00000257040	.	.
AC005488.1	.	.	.	.	.	.	0	0	0	0	0	0	0	0	0	0	0	0	Uncharacterized protein [Source:UniProtKB/TrEMBL;Acc:M0R184]	chr7:72459477-72464996	.	.	.	.	.	.	protein_coding	ENSG00000267985	.	.
AC005493.1	.	.	.	.	.	.	0	0	0	0	0	0	0	0	0	0	0	0	Uncharacterized protein [Source:UniProtKB/TrEMBL;Acc:H7BYU2]	chr7:34685708-34917944	.	.	.	.	.	.	protein_coding	ENSG00000214841	.	.
AC005544.1	.	.	.	.	.	.	0.0476583	0	1.9776e-07	4.48033e-06	7.31528e-07	2.24632e-07	8.4482e-07	0	2.12935e-06	0.072194	0	8.96066e-06	Uncharacterized protein [Source:UniProtKB/TrEMBL;Acc:H0Y3C3]	chr17:64961025-65029514	.	.	.	.	.	.	protein_coding	ENSG00000214167	101929306	.
AC005549.3	.	.	.	.	.	.	0	0	0	0	0	0	0	0	0	0	0	0	Uncharacterized protein [Source:UniProtKB/TrEMBL;Acc:M0R0Z2]	chr17:32581899-32584222	.	.	.	.	.	.	protein_coding	ENSG00000268024	.	.
AC005606.1	.	.	.	.	.	.	1.89647e-194	5.98032e-21	2.9582e-167	3.96266e-48	1.00773e-12	8.45064e-07	2.30184e-63	3.1246e-96	4.67789e-32	1.65484e-36	7.92532e-48	9.03146e-69	LOC283868 protein; Uncharacterized protein [Source:UniProtKB/TrEMBL;Acc:Q8N4X1]	chr16:2022037-2032934	.	.	.	.	.	.	protein_coding	ENSG00000269205	.	.
AC005609.1	.	.	.	.	.	.	0	0	0	0.0352569	0	0.0364402	0	0	0	0	0.0358219	0.0346918	Uncharacterized protein; cDNA FLJ34090 fis, clone FCBBF3006399 [Source:UniProtKB/TrEMBL;Acc:Q8NB83]	chr5:140165720-140391932	.	.	.	.	.	.	protein_coding	ENSG00000249034	.	.
AC005841.1	.	.	.	.	.	.	0	0	0	0	0	0	0	0	0	1.07446e-05	0	0	Uncharacterized protein ENSP00000372125 [Source:UniProtKB/Swiss-Prot;Acc:A6NCN8]	chr12:2958204-2966249	.	XM_005253817, XM_005275716, XM_005276414	.	.	.	XP_005276471, XP_005275773, XP_005253874	protein_coding	ENSG00000206044	101929469	.
AC006014.1	.	.	.	.	.	.	0	0	0	0	0	0	0	0	0	0	0	0	Uncharacterized protein [Source:UniProtKB/TrEMBL;Acc:M0R184]	chr7:74999907-75005425	.	.	.	.	.	.	protein_coding	ENSG00000268891	.	.
AC006116.20	.	.	.	.	.	.	0.123358	0.234483	0.230587	0	0	0	0	0	0	0	0	0	.	chr19:56731038-56879752	.	.	.	.	.	.	protein_coding	ENSG00000267710	.	.
AC006372.1	.	.	.	.	.	.	0	0.018111	0	0	0	0	0	0	0	0	0	0	.	chr7:157318476-157320019	.	.	.	.	.	.	protein_coding	ENSG00000236669	.	.
AC006435.1	.	.	.	.	.	.	0.149125	0.142934	0.0728377	0	0.177259	0	0.188059	0	0	0.456007	0	0	Uncharacterized protein [Source:UniProtKB/TrEMBL;Acc:Q4G0H6]	chr17:2310278-2318731	.	.	.	.	.	.	protein_coding	ENSG00000205821	.	.
AC006449.1	.	.	.	.	.	.	0.135686	0	0	0	0	0.390627	0	0.367387	0	0	0	0	NS5ATP13TP1; Uncharacterized protein [Source:UniProtKB/TrEMBL;Acc:Q6JHZ5]	chr17:36861794-36886056	.	.	.	.	.	.	protein_coding	ENSG00000269094	.	.
AC006486.1	.	.	.	.	.	.	0.0914881	0.0158096	0.01696	0.306788	0.458738	0.276819	0.223503	0.369896	0.258341	0.374051	0.221869	0.391707	.	chr19:42734337-42759309	.	.	.	.	.	.	protein_coding	ENSG00000204957	.	.
AC006486.9	.	.	.	.	.	.	0.250117	0.853722	0.766661	2.36457e-07	6.92998e-06	8.89106e-07	3.87961e-05	4.77785e-05	5.97613e-11	1.95821e-06	1.82977e-07	2.89937e-07	.	chr19:42734337-42759309	.	.	.	.	.	.	protein_coding	ENSG00000268643	.	.
AC006538.4	.	.	.	.	.	.	0.705748	5.43879e-05	5.36614e-05	5.02497e-06	0.0918375	0.000893443	3.78299e-10	4.46173e-15	4.99174e-05	5.47245e-08	1.00494e-05	5.7651e-10	.	chr19:2714564-2740150	.	.	.	.	.	.	protein_coding	ENSG00000267001	.	.
AC007040.11	.	.	.	.	.	.	0.207567	0.299723	0.125551	9.35123e-147	0.0873706	0.0711033	0.0470555	0.152576	0.0457117	0.225648	3.12542e-218	1.87025e-146	.	chr2:71163011-71222466	.	.	.	.	.	.	protein_coding	ENSG00000258881	.	.
AC007192.4	.	.	.	.	.	.	1.13152	0.382595	0.94573	0.794967	1.22788	1.04486	0.227457	0.000119771	0.42533	2.29991	0.252368	1.33757	Phosphatidylinositol 3-kinase regulatory subunit beta [Source:UniProtKB/Swiss-Prot;Acc:O00459]	chr19:18263927-18281350	.	.	.	.	.	.	protein_coding	ENSG00000268173	.	.
AC007204.1	.	.	.	.	.	.	0	0	0	0	0	0	0	0	0	0	0	0	.	chr19:20047768-20048639	.	.	.	.	.	.	unprocessed_pseudogene	ENSG00000268461	.	.
AC007216.2	.	.	.	.	.	.	0	0	0	0	0	0	0	0	0	0	0	0	Uncharacterized protein [Source:UniProtKB/TrEMBL;Acc:M0QYP7]	chr16:12061999-12062333	.	.	.	.	.	.	protein_coding	ENSG00000269121	.	.
AC007377.1	.	.	.	.	.	.	0	0	0	0	0	0	0	0	0	0	0	0	.	chr2:40324409-40838193	.	.	.	.	.	.	protein_coding	ENSG00000268898	.	.
AC007382.1	.	.	.	.	.	.	1.13322	0	4.83509	2.0047	0	3.64292	3.38843	0	0	0	4.00941	0	Uncharacterized protein [Source:UniProtKB/TrEMBL;Acc:M0QZ87]	chr2:37068326-37068530	.	.	.	.	.	.	protein_coding	ENSG00000268688	.	.
AC007421.1	.	.	.	.	.	.	0	0	0	0	0	0	0	0	0	0	0	0	.	chr17:7486846-7536701	.	.	.	.	.	.	protein_coding	ENSG00000268503	.	.
AC007461.1	.	.	.	.	.	.	0	0	0	0	0	0	0	0	0	0	0	0	Uncharacterized protein [Source:UniProtKB/TrEMBL;Acc:Q8IVH9]	chr17:70036163-70036872	.	.	.	.	.	.	protein_coding	ENSG00000267893	.	.
AC007773.3	.	.	.	.	.	.	0	0	0	0	0	0	0	0	0	0	0	0	Uncharacterized protein [Source:UniProtKB/TrEMBL;Acc:M0QXJ4]	chr19:32895914-32976801	.	.	.	.	.	.	protein_coding	ENSG00000269093	.	.
AC007919.2	.	.	.	.	.	.	0	0	0	0	0	0	0	0	0	0	0	0	HCG1787166; PRO1163; Uncharacterized protein [Source:UniProtKB/TrEMBL;Acc:Q9P1K3]	chr3:172348038-172429008	.	.	.	.	.	.	protein_coding	ENSG00000269496	.	.
AC007952.1	.	.	.	.	.	.	0	0	0	0	0	0	0	0	0	0	0	0	Uncharacterized protein [Source:UniProtKB/TrEMBL;Acc:H7C2L0]	chr17:19030781-19062489	.	.	.	.	.	.	protein_coding	ENSG00000214844	.	.
AC007956.1	.	.	.	.	.	.	5.33204e-08	0.284914	0.139089	0.381165	0.348818	6.75419e-10	0	2.48045e-09	0.35612	0	0.388154	0.374175	Full-length cDNA 5-PRIME end of clone CS0CAP004YO05 of Thymus of Homo sapiens (human); Uncharacterized protein [Source:UniProtKB/TrEMBL;Acc:Q86TS6]	chr14:75127954-75179818	.	.	.	.	.	.	protein_coding	ENSG00000214670	.	.
AC007965.1	.	.	.	.	.	.	0	0	0	0	0	0	0	0	0	0	0	0	Uncharacterized protein [Source:UniProtKB/TrEMBL;Acc:M0QY58]	chrY:28111775-28114889	.	.	.	.	.	.	protein_coding	ENSG00000269393	.	.
AC008132.13	.	.	.	.	.	.	0	0	0	0	0	0	0	0	0	0	0	0	.	chr22:18834323-18839322	.	.	NR_135922	.	.	.	transcribed_processed_pseudogene	ENSG00000161103	102725072	.
AC008267.1	.	.	.	.	.	.	0	0	0	0	0	0	0	0	0	0	0	0	HCG1983814; Uncharacterized protein [Source:UniProtKB/TrEMBL;Acc:Q8TCB9]	chr7:65939542-65940709	.	.	.	.	.	.	protein_coding	ENSG00000267941	.	.
AC008372.1	.	.	.	.	.	.	0	0	0	0	0	0	0	0	0	0	0	0	.	chr14:78174413-78236085	.	.	.	.	.	.	protein_coding	ENSG00000268208	.	.
AC008387.1	.	.	.	.	.	.	0	0	0	0	0	0	0	0	0	0	0	0	.	chr5:72894202-72896845	.	.	.	.	.	.	protein_coding	ENSG00000268217	.	.
AC008498.1	.	.	.	.	.	.	0	0	0	0	0	0	0	0	0	0	0	0	.	chr5:60240955-60448864	.	.	.	.	.	.	protein_coding	ENSG00000269267	.	.
AC008686.1	.	.	.	.	.	.	0	0	0	0	0	0	0	0	0	0	0	0	Uncharacterized protein [Source:UniProtKB/TrEMBL;Acc:H7BYR1]	chr19:13890883-13900972	.	.	.	.	.	.	protein_coding	ENSG00000214109	.	.
AC008914.1	.	.	.	.	.	.	0	0	0	0	0	0	0	0	0	0	0	0	Uncharacterized protein [Source:UniProtKB/TrEMBL;Acc:M0R272]	chr5:55224467-55224569	.	.	.	.	.	.	protein_coding	ENSG00000268280	.	.
AC008948.1	.	.	.	.	.	.	0	0	0	0	0	0	0	0	0.0802096	0	0	0	.	chr5:101569689-101632253	.	.	.	.	.	.	protein_coding	ENSG00000268424	.	.
AC008964.1	.	.	.	.	.	.	0.0220955	0.025421	0	0	0	0	0	0	0	0	0	0	.	chr5:39105337-39270759	.	.	.	.	.	.	protein_coding	ENSG00000269215	.	.
AC009014.3	.	.	.	.	.	.	0.0307799	0	0	0.0393752	0	0	0	0	0.151287	0.197991	0.0787503	0	.	chr5:135527155-135528822	.	.	.	.	.	.	protein_coding	ENSG00000271824	.	.
AC009041.2	.	.	.	.	.	.	0	0	0	0	0	0	0	0	0	0	0	0	.	chr16:1031251-1031663	.	.	.	.	.	.	protein_coding	ENSG00000269047	.	.
AC009060.1	.	.	.	.	.	.	0	0	0	0.204998	0	0	0	0	0	0	0.409996	0	Uncharacterized protein [Source:UniProtKB/TrEMBL;Acc:M0R2Z2]	chr16:70239302-70239683	.	.	.	.	.	.	protein_coding	ENSG00000269746	.	.
AC009065.1	.	.	.	.	.	.	0.0994541	0.210806	0	0	0	0	0	0	0	0	0	0	Uncharacterized protein [Source:UniProtKB/TrEMBL;Acc:H0Y5Z1]	chr16:2303116-2318413	.	.	.	.	.	.	protein_coding	ENSG00000167970	.	.
AC009133.22	◎	.	.	.	.	◎	58.6218	34.4283	26.7688	84.2445	90.5298	89.5385	25.442	24.2634	53.2077	45.9813	89.9299	78.559	.	chr16:29674299-29710020	.	.	.	.	.	.	protein_coding	ENSG00000277669	.	.
AC009802.1	.	.	.	.	.	.	0	0	0	0	0	0	0	0	0	0	0	0	Uncharacterized protein [Source:UniProtKB/TrEMBL;Acc:M0QZX6]	chr18:61575224-61609601	.	.	.	.	.	.	protein_coding	ENSG00000268706	.	.
AC009977.1	.	.	.	.	.	.	0	0	0	0	0	0	0	0	0	0	0	0	Uncharacterized protein [Source:UniProtKB/TrEMBL;Acc:M0R1T6]	chrY:21737894-21738068	.	.	.	.	.	.	protein_coding	ENSG00000269084	.	.
AC010327.2	.	.	.	.	.	.	0	0	0.021976	0.0141631	0.0542799	0.0288794	0.0574492	0.0261904	0.0275142	0.0352712	0	0.0283262	Uncharacterized protein; cDNA FLJ45856 fis, clone OCBBF2025631 [Source:UniProtKB/TrEMBL;Acc:Q6ZS40]	chr19:55738115-55770363	.	.	.	.	.	.	protein_coding	ENSG00000269808	.	.
AC010368.2	.	.	.	.	.	.	0	0	0	0	0	0	0	0	0	0	0	0	.	chr5:35048860-35230691	.	.	.	.	.	.	protein_coding	ENSG00000269027	.	.
AC010441.1	◎	.	◎	◎	.	◎	14.0242	22.3089	15.7453	15.2638	31.8323	35.1002	7.45978	6.50936	17.9458	20.8522	15.3959	15.1318	.	chr5:150157507-150176297	.	.	.	.	.	.	protein_coding	ENSG00000269636	.	.
AC010646.3	.	.	.	.	.	.	1.35099e-07	1.09014e-07	2.4888e-10	1.54402e-10	4.63513e-06	7.2871e-35	7.97135e-13	2.38839e-106	5.85141e-05	1.75066e-14	2.37244e-46	3.08803e-10	.	chr19:17342691-17375605	.	.	.	.	.	.	protein_coding	ENSG00000269095	.	.
AC010731.4	.	.	.	.	.	.	0	0	0	0	0	0	0	0	0	0	0	0	.	chr2:207507141-207514173	NM_001102659	.	.	.	NP_001096129	.	protein_coding	ENSG00000235118	200726	.
AC010760.1	.	.	.	.	.	.	0	0	0	0	0	0	0	0	0	0	0	0	.	chr15:22456894-22460351	.	.	.	.	.	.	protein_coding	ENSG00000269182	.	.
AC010877.1	.	.	.	.	.	.	0	0	0	0	0	0	0	0	0	0	0	0	Uncharacterized protein [Source:UniProtKB/TrEMBL;Acc:M0R234]	chrY:15360258-15592553	.	.	.	.	.	.	protein_coding	ENSG00000269291	.	.
AC011298.1	.	.	.	.	.	.	0	0	0	0	0	0	0	0	0	0	0	0	HCG2013738; Uncharacterized protein [Source:UniProtKB/TrEMBL;Acc:Q8TAU7]	chr2:241624477-241624705	.	.	.	.	.	.	protein_coding	ENSG00000268822	.	.
AC011308.1	.	.	.	.	.	.	0	0	0	0	0	0	0	0	0	0	0	0	.	chr2:157291952-157442915	.	.	.	.	.	.	protein_coding	ENSG00000268857	.	.
AC011475.1	.	.	.	.	.	.	0	0	0	0	0	0	0	0	0	0	0	0	Uncharacterized protein [Source:UniProtKB/TrEMBL;Acc:H0Y7T2]	chr19:10713185-10755235	.	.	.	.	.	.	protein_coding	ENSG00000226104	.	.
AC011513.3	.	.	.	.	.	.	0	0	0	0	0	0	0	0	0	0	0	0	.	chr19:42212503-42276113	.	.	.	.	.	.	protein_coding	ENSG00000267881	.	.
AC011755.1	.	.	.	.	.	.	0	0	0	0	0	0	0	0	0	0	0	0	HCG2006742; Protein LOC100996685 [Source:UniProtKB/TrEMBL;Acc:M0R3G2]	chr2:133429371-134326034	.	.	.	.	.	.	protein_coding	ENSG00000269686	.	.
AC011897.1	.	.	.	.	.	.	2.28188	1.11946	1.54571	0	0	0	0	0	0	0	0	0	Uncharacterized protein [Source:UniProtKB/TrEMBL;Acc:J3QQN5]	chr2:14772809-14790933	.	.	.	.	.	.	protein_coding	ENSG00000265629	.	.
AC012067.1	.	.	.	.	.	.	0	0	0	0	0	0	0	0	0	0	0	0	.	chrY:4868266-5610265	.	.	.	.	.	.	protein_coding	ENSG00000269464	.	.
AC012215.1	.	.	.	.	.	.	0.00918975	0.0104407	0.0283598	0	0	0	0	0	0	0	0	0	Uncharacterized protein [Source:UniProtKB/TrEMBL;Acc:Q7Z2V2]	chr8:35092974-35654068	.	.	.	.	.	.	protein_coding	ENSG00000233863	.	.
AC012360.1	.	.	.	.	.	.	0	0	0	0	0	0	0	0	0	0	0	0	.	chr2:105867758-105869601	.	.	.	.	.	.	protein_coding	ENSG00000268556	.	.
AC012414.1	.	.	.	.	.	.	0	0	0.119072	0	0	0	0	0	0	0	0	0	Uncharacterized protein [Source:UniProtKB/TrEMBL;Acc:M0QZ11]	chr15:21004686-21005367	.	.	.	.	.	.	protein_coding	ENSG00000268343	.	.
AC012485.1	.	.	.	.	.	.	0	0	0	0	0	0	0	0	0	0	0	0	Uncharacterized protein [Source:UniProtKB/TrEMBL;Acc:M0QY72]	chr2:239152678-239197250	.	.	.	.	.	.	protein_coding	ENSG00000268396	.	.
AC013269.5	.	.	.	.	.	.	0	0	0	0	0	0	0	0	0	0	0	0	.	chr2:131296667-131307456	.	.	.	.	.	.	protein_coding	ENSG00000184761	.	.
AC013461.1	.	.	.	.	.	.	16.2167	24.5681	19.9096	3.83602	4.72225	4.48362	6.2014	5.93122	5.18365	5.28015	4.0989	3.57315	Mitogen-activated protein kinase kinase kinase MLT [Source:UniProtKB/Swiss-Prot;Acc:Q9NYL2]	chr2:173940162-174132738	NM_016653, NM_133646	XM_005246640	.	.	NP_057737, NP_598407	XP_005246697, XP_016859812, XP_016859813	protein_coding	ENSG00000091436	51776	.
AC013468.1	.	.	.	.	.	.	0	0	0	0	0	0	0	0	0	0	0	0	.	chr2:190635048-190742355	.	.	.	.	.	.	protein_coding	ENSG00000231145	.	.
AC013469.1	.	.	.	.	.	.	0	0	0	0	0	0	0	0	0	0	0	0	.	chr2:241053906-241064304	.	.	.	.	.	.	protein_coding	ENSG00000267963	.	.
AC015660.1	.	.	.	.	.	.	0	0	0	0	0	0	0	0	0	0	0	0	HCG1993240; Serologically defined breast cancer antigen NY-BR-40; Uncharacterized protein [Source:UniProtKB/TrEMBL;Acc:Q9H283]	chr15:100038446-100038578	.	.	.	.	.	.	protein_coding	ENSG00000269810	.	.
AC015987.2	.	.	.	.	.	.	0.0220184	0.0252369	0	0.0567516	0	0	0	0	0.0549962	0	0.113503	0	.	chr7:135611508-135662101	.	.	.	.	.	.	protein_coding	ENSG00000236338	.	.
AC015989.1	.	.	.	.	.	.	0	0	0	0	0	0	0	0	0	0	0	0	Uncharacterized protein [Source:UniProtKB/TrEMBL;Acc:H7BYV9]	chr18:60382682-60647666	.	.	.	.	.	.	protein_coding	ENSG00000215431	.	.
AC015989.2	.	.	.	.	.	.	0	0	0	0	0	0	0	0	0	0	0	0	.	chr18:60382682-60647666	.	.	.	.	.	.	protein_coding	ENSG00000269630	.	.
AC016251.1	.	.	.	.	.	.	0	0	0	0	0	0	0	0	0	1.12606	0	0	.	chr15:96831279-96831660	.	.	.	.	.	.	protein_coding	ENSG00000205148	.	.
AC016559.1	.	.	.	.	.	.	0	0	0	0	0	0	0	0	0	0	0	0	Uncharacterized protein [Source:UniProtKB/TrEMBL;Acc:Q9BUN3]	chr5:78523713-78523911	.	.	.	.	.	.	protein_coding	ENSG00000268012	.	.
AC016586.1	.	.	.	.	.	.	0	0.0136185	0.0144357	0.0186809	0.0355729	0	0.0753952	0.0694368	0.0363359	0	0	0.0373619	.	chr19:4041126-4043154	.	.	.	.	.	.	protein_coding	ENSG00000205147	.	.
AC016745.1	.	.	.	.	.	.	0	0	0	0	0	0	0	0	0	0	0	0	HDCMB45P; Uncharacterized protein [Source:UniProtKB/TrEMBL;Acc:Q9P1R7]	chr2:114195267-114253766	.	.	.	.	.	.	protein_coding	ENSG00000238091	.	.
AC016752.1	.	.	.	.	.	.	0	0	0	0	0	0	0	0	0	0	0	0	Uncharacterized protein [Source:UniProtKB/TrEMBL;Acc:M0QY58]	chrY:25847478-25850592	.	.	.	.	.	.	protein_coding	ENSG00000267935	.	.
AC017028.1	.	.	.	.	.	.	0	0	0	0	0	0	0	0	0	0	0	0	Uncharacterized protein [Source:UniProtKB/TrEMBL;Acc:E7ERG0]	chr2:239969863-240322643	.	.	.	.	.	.	protein_coding	ENSG00000213828	.	.
AC017081.1	.	.	.	.	.	.	0	0	0	0	0	0	0	0	0	0	0	0	Uncharacterized protein [Source:UniProtKB/TrEMBL;Acc:M0R1D0]	chr2:207220462-207220843	.	.	.	.	.	.	protein_coding	ENSG00000269633	.	.
AC018445.1	.	.	.	.	.	.	0	0	0	0	0	0	0	0	0	0	0	0	Uncharacterized protein [Source:UniProtKB/TrEMBL;Acc:Q9NY04]	chr18:77155855-77289325	.	.	.	.	.	.	protein_coding	ENSG00000269679	.	.
AC018470.1	.	.	.	.	.	.	0	0	0	0	0	0	0.0997854	0	0	0	0	0	Uncharacterized protein FLJ46347 [Source:UniProtKB/Swiss-Prot;Acc:Q6ZRH9]	chr2:175199673-175203220	.	.	.	.	.	.	protein_coding	ENSG00000268241	.	.
AC018512.1	.	.	.	.	.	.	0	0	0	0	0	0	0	0	0	0	0	0	.	chr15:44038589-44095241	.	.	.	.	.	.	protein_coding	ENSG00000268488	.	.
AC018630.1	.	.	.	.	.	.	0	0	0	0	0	0	0	0	0	0	0	0	Uncharacterized protein [Source:UniProtKB/TrEMBL;Acc:M0R3A1]	chr12:10998447-11328615	.	.	.	.	.	.	protein_coding	ENSG00000268301	.	.
AC018755.1	.	.	.	.	.	.	0.0232764	0.0202393	0.042605	0.0571134	0	0.0581885	0	0	0.110277	0.0675433	0.114227	0	HCG2008157; Uncharacterized protein; cDNA FLJ30403 fis, clone BRACE2008480 [Source:UniProtKB/TrEMBL;Acc:Q96NP5]	chr19:52074550-52097630	.	.	.	.	.	.	protein_coding	ENSG00000167765	.	.
AC018755.18	.	.	.	.	.	.	0	0	0	0	0	0	0	0	0	0	0	0	.	chr19:52115179-52150142	.	.	.	.	.	XP_016882908	protein_coding	ENSG00000268500	8778	.
AC018867.1	.	.	.	.	.	.	0	0	0	0	0	0	0	0	0	0	0	0	Uncharacterized protein [Source:UniProtKB/TrEMBL;Acc:H7BYP7]	chr2:187350882-187374090	.	.	.	.	.	.	protein_coding	ENSG00000213953	.	.
AC018867.2	.	.	.	.	.	.	0	0	0	0	0	0	0	0	0	0	0	0	.	chr2:187350882-187374090	.	.	.	.	.	.	protein_coding	ENSG00000268846	.	.
AC019206.1	.	.	.	.	.	.	0	0	0	0	0	0	0	0	0	0	0	0	Uncharacterized protein [Source:UniProtKB/TrEMBL;Acc:M0QYB2]	chr2:70120691-70132350	.	.	.	.	.	.	protein_coding	ENSG00000268328	.	.
AC019294.1	.	.	.	.	.	.	0	0	0	0	0	0	0	0	0	0	0	0	.	chr15:76030310-76031568	.	.	.	.	.	.	protein_coding	ENSG00000256530	.	.
AC020629.1	.	.	.	.	.	.	0	0	0	0	0	0	0	0	0	0	0	0	Uncharacterized protein [Source:UniProtKB/TrEMBL;Acc:M0QZ06]	chr12:42550905-42632151	.	.	.	.	.	.	protein_coding	ENSG00000269367	.	.
AC020922.1	.	.	.	.	.	.	0.563765	0.159341	0.661159	1.00013	0.46261	1.59558	1.02053	1.16346	0.678732	0.665544	1.12374	0.876519	Uncharacterized protein [Source:UniProtKB/TrEMBL;Acc:F5GYW4]	chr19:55851220-55859488	.	.	.	.	.	.	protein_coding	ENSG00000267531	.	.
AC020952.1	.	.	.	.	.	.	0	0	0	0	0	0	0	0	0	0	0	0	Uncharacterized protein [Source:UniProtKB/TrEMBL;Acc:M0QZE3]	chr19:31640361-31640757	.	.	.	.	.	.	protein_coding	ENSG00000268953	.	.
AC022210.1	.	.	.	.	.	.	0	0	0	0	0	0	0	0	0	0	0	0	.	chr2:85122208-85122345	.	.	.	.	.	.	protein_coding	ENSG00000269417	.	.
AC022400.2	.	.	.	.	.	.	0.314113	0.13991	0.433614	0.401045	1.17774	0	0	0	0	0	0.398297	0.403794	Uncharacterized protein; cDNA FLJ44715 fis, clone BRACE3021430 [Source:UniProtKB/TrEMBL;Acc:Q6ZTF3]	chr10:75531934-75535977	.	.	.	.	.	.	protein_coding	ENSG00000267964	.	.
AC022498.1	.	.	.	.	.	.	0	0	0	0.0868876	0.0403988	0.089429	0.0881131	0.0816337	0	0.0515786	0.0885344	0.0852409	Uncharacterized protein [Source:UniProtKB/TrEMBL;Acc:E7EQ38]	chr3:187871071-188608460	.	.	.	.	.	.	protein_coding	ENSG00000213132	.	.
AC022532.1	.	.	.	.	.	.	0.0370511	0.0401993	0.0912614	0.203094	0.166823	0.134919	0.089732	0	0	0.0534441	0.230018	0.176169	Uncharacterized protein [Source:UniProtKB/TrEMBL;Acc:F8WBX8]	chr10:72192070-72201423	.	.	.	.	.	.	protein_coding	ENSG00000197604	.	.
AC022819.2	.	.	.	.	.	.	0	0	0	0	0	0	0	0	0	0	0	0	Uncharacterized protein [Source:UniProtKB/TrEMBL;Acc:M0QXY4]	chr15:99791566-99930934	.	.	.	.	.	.	protein_coding	ENSG00000268730	.	.
AC023632.1	.	.	.	.	.	.	0	0	0	0	0	0	0	0	0	0	0	0	HCG2009141; PRO2397; Uncharacterized protein [Source:UniProtKB/TrEMBL;Acc:Q9H351]	chr8:95499920-95565757	.	.	.	.	.	.	protein_coding	ENSG00000212997	.	.
AC024257.1	.	.	.	.	.	.	0	0	0	0	0	0.0690821	0	0	0	0	0	0	CDNA FLJ26186 fis, clone ADG04757; Uncharacterized protein [Source:UniProtKB/TrEMBL;Acc:Q6ZP97]	chr12:48759918-48761738	.	.	.	.	.	.	protein_coding	ENSG00000269282	.	.
AC024580.1	.	.	.	.	.	.	0.0555442	0.305051	0	0	0	0	0	0	0	0	0	0	Uncharacterized protein [Source:UniProtKB/TrEMBL;Acc:H7BYB4]	chr19:56652555-56672262	.	.	.	.	.	.	protein_coding	ENSG00000204533	.	.
AC024592.12	.	.	.	.	.	.	8.3027	4.29491	3.46217	2.23111	0.601697	1.65049	0.96402	1.7495	2.40136	4.00016e-127	2.24677	2.21545	.	chr19:5865836-5903797	.	.	.	.	.	.	protein_coding	ENSG00000267740	.	.
AC025262.1	.	.	.	.	.	.	0	0	0	0	0	0	0	0	0	0	0	0	Mesenchymal stem cell protein DSC96; Uncharacterized protein [Source:UniProtKB/TrEMBL;Acc:Q9NYI4]	chr12:64900780-65091347	.	.	.	.	.	.	protein_coding	ENSG00000268028	.	.
AC025278.1	.	.	.	.	.	.	0	0	0	0.0208725	0	0	0	0	0	0	0	0.0417451	Uncharacterized protein [Source:UniProtKB/TrEMBL;Acc:F8WD29]	chr19:7011513-7013338	.	.	.	.	.	.	protein_coding	ENSG00000204752	.	.
AC025287.1	.	.	.	.	.	.	0	0	0	0	0	0	0	0	0	0	0	0	Uncharacterized protein [Source:UniProtKB/TrEMBL;Acc:H0YFN1]	chr16:75728366-75734089	.	.	.	.	.	.	protein_coding	ENSG00000214325	.	.
AC025335.1	◎	.	.	.	.	◎	5.65363	5.5076	5.4549	0.890183	1.23865	1.0139	0.317186	0.546156	0.761169	0.932156	1.09471	0.685652	.	chr17:7816641-7819594	.	.	.	.	.	.	protein_coding	ENSG00000179859	.	.
AC026310.1	.	.	.	.	.	.	0	0	0.0170284	0	0	0	0	0	0	0	0	0	Protein 101060047 [Source:UniProtKB/TrEMBL;Acc:M0QY78]	chr12:24962955-25102393	.	.	.	.	.	.	protein_coding	ENSG00000268865	.	.
AC026369.1	.	.	.	.	.	.	0	0	0	0	0	0	0	0	0	0	0	0	Uncharacterized protein [Source:UniProtKB/TrEMBL;Acc:M0R2V1]	chr12:147051-147377	.	.	.	.	.	.	protein_coding	ENSG00000268640	.	.
AC026407.1	.	.	.	.	.	.	0	0	0	0	0	0	0	0	0	0	0	0	Uncharacterized protein [Source:UniProtKB/TrEMBL;Acc:M0R239]	chr5:157158204-157168456	.	.	.	.	.	.	protein_coding	ENSG00000268432	.	.
AC026461.1	.	.	.	.	.	.	0	0	0	0	0	0	0	0	0	0	0	0	Uncharacterized protein [Source:UniProtKB/TrEMBL;Acc:M0QZH4]	chr16:56662970-56667898	.	.	.	.	.	.	protein_coding	ENSG00000268317	.	.
AC026740.1	.	.	.	.	.	.	1.24302	0.940733	0.808418	0.310768	0	0.254011	0.12331	0.227147	0.117708	0.304153	0.253044	0.368493	Uncharacterized protein [Source:UniProtKB/TrEMBL;Acc:M0R2Q8]	chr5:659976-693510	.	.	.	.	.	.	protein_coding	ENSG00000268885	.	.
AC027228.1	.	.	.	.	.	.	0	0.0228003	0.0234079	0.0301618	0	0.064577	0.0609918	0	0	0	0	0.0603236	HCG2005369; Uncharacterized protein [Source:UniProtKB/TrEMBL;Acc:M0QZJ0]	chr15:78830022-78831288	.	.	.	.	.	.	protein_coding	ENSG00000268838	.	.
AC027309.1	.	.	.	.	.	.	0	0	0	0	0	0	0	0	0	0	0	0	.	chr5:172036244-172036436	.	.	.	.	.	.	protein_coding	ENSG00000268553	.	.
AC037199.1	.	.	.	.	.	.	0	0	0	0	0	0	0	0	0	0	0	0	Uncharacterized protein [Source:UniProtKB/TrEMBL;Acc:M0R2A5]	chr19:51376504-51383823	.	.	.	.	.	.	protein_coding	ENSG00000267880	.	.
AC037459.4	.	.	.	.	.	.	5.76725e-74	2.73665e-75	1.0287e-74	0.784098	1.13952	9.29106e-94	0.000383868	6.09419e-47	2.56813	7.49187e-77	1.37555e-25	1.5682	.	chr8:22436253-22461663	.	.	.	.	.	.	protein_coding	ENSG00000248235	.	.
AC040160.1	.	.	.	.	.	.	0.178727	0.0621394	0	0.214689	0.137061	0.145879	0.145756	0.134875	0	0.178198	0	0.429378	.	chr16:67241042-67260930	.	.	.	.	.	.	.	.	.	.
AC040977.1	.	.	.	.	.	.	0	0.0934272	0.186041	0	0	0	0	0	0	0	0	0	Uncharacterized protein [Source:UniProtKB/TrEMBL;Acc:M0QX62]	chr17:6915735-6920839	.	.	.	.	.	.	protein_coding	ENSG00000269871	.	.
AC051642.1	.	.	.	.	.	.	0	0	0	0	0	0	0	0	0	0	0	0	.	chr8:23386317-23432976	.	.	.	.	.	.	protein_coding	ENSG00000268085	.	.
AC055736.1	.	.	.	.	.	.	0	0	0	0	0	0	0	0	0	0	0	0	Uncharacterized protein [Source:UniProtKB/TrEMBL;Acc:M0QZD6]	chr12:52922914-52922980	.	.	.	.	.	.	protein_coding	ENSG00000268716	.	.
AC061975.10	.	.	.	.	.	.	0	0	0	0	0	0	0	0	0	0	0	0	Uncharacterized protein [Source:UniProtKB/TrEMBL;Acc:M0QZS9]	chr17:26638666-26642323	.	.	.	.	.	.	protein_coding	ENSG00000268206	.	.
AC061992.1	.	.	.	.	.	.	0.119924	0.366195	0.117877	0	0	0	0	0	0.325783	0	0	0	Uncharacterized protein [Source:UniProtKB/TrEMBL;Acc:M0R270]	chr17:76374720-76573476	.	.	.	.	.	.	protein_coding	ENSG00000268965	.	.
AC068039.1	.	.	.	.	.	.	0	0	0	0	0	0	0	0	0	0	0	0	Uncharacterized protein [Source:UniProtKB/TrEMBL;Acc:M0QYR8]	chr2:172543918-172604930	.	.	.	.	.	.	protein_coding	ENSG00000268821	.	.
AC068533.7	.	.	.	.	.	.	0.389105	0.563959	0.894085	0.172574	1.49438e-14	0.401926	0.284243	0.24153	7.21617e-09	0.912368	0.345148	3.77972e-20	.	chr7:65540784-65619548	.	.	.	.	.	.	protein_coding	ENSG00000249319	.	.
AC068620.1	.	.	.	.	.	.	0	0	0	0	0	0	0	0	0	0	0	0	Uncharacterized protein [Source:UniProtKB/TrEMBL;Acc:M0R188]	chr4:57259527-57301781	.	.	.	.	.	.	protein_coding	ENSG00000268171	.	.
AC068987.1	.	.	.	.	.	.	0	0	0	0.115388	4.02671e-14	0.00095257	3.23185e-06	0.252571	0.0144445	0.0523501	0.0534697	0.177306	HCG1997999; cDNA FLJ33996 fis, clone DFNES2008881 [Source:UniProtKB/TrEMBL;Acc:Q8NBA4]	chr12:51984709-52206648	.	.	.	.	.	.	protein_coding	ENSG00000260415	.	.
AC069368.3	.	.	.	.	.	.	1.59693e-08	0.351681	0.132956	4.24828e-16	6.99488e-37	5.14284e-72	5.21327e-29	8.52049e-50	4.88749e-78	2.81417e-17	8.49655e-16	2.86241e-74	.	chr15:65134081-65251042	.	.	.	.	.	.	protein_coding	ENSG00000249240	.	.
AC069547.1	.	.	.	.	.	.	0	0	0	0	0	0	0	0	0	0	0	0	HCG1745369; PRO3073; Uncharacterized protein [Source:UniProtKB/TrEMBL;Acc:Q9P136]	chr10:52065345-52383743	.	.	.	.	.	.	protein_coding	ENSG00000269165	.	.
AC069547.2	.	.	.	.	.	.	0	0	0	0	0	0	0	0	0	0	0	0	Uncharacterized protein [Source:UniProtKB/TrEMBL;Acc:M0R0F1]	chr10:52065345-52383743	.	.	.	.	.	.	protein_coding	ENSG00000269700	.	.
AC073063.1	.	.	.	.	.	.	0	0	0	0	0	0	0	0	0	0	0	0	.	chr7:98992585-99063954	.	.	.	.	.	.	protein_coding	ENSG00000214314	.	.
AC073188.1	.	.	.	.	.	.	0	0	0	0	0	0	0	0	0	0	0	0	.	chr7:62858413-62858860	.	.	.	.	.	.	processed_transcript	ENSG00000268181	.	.
AC073333.1	.	.	.	.	.	.	0	0	0	0	0	0	0	0	0	0	0	0	Uncharacterized protein [Source:UniProtKB/TrEMBL;Acc:M0R0C5]	chr7:16828865-16829246	.	.	.	.	.	.	protein_coding	ENSG00000267906	.	.
AC073528.1	.	.	.	.	.	.	0	0	0	0	0	0	0	0	0	0	0	0	.	chr12:77949296-77950568	.	.	.	.	.	.	protein_coding	ENSG00000268519	.	.
AC073569.1	.	.	.	.	.	.	0	0	0	0	0	0	0	0	0	0	0	0	.	chr12:80167342-80329240	.	.	.	.	.	.	protein_coding	ENSG00000269531	.	.
AC073610.5	.	.	.	.	.	.	0.0013418	7.60688e-21	2.49563e-16	0.220553	1.84378e-57	9.46039e-45	5.7042e-51	5.8487e-41	3.05207e-20	1.30468e-24	4.63224e-13	0.441106	.	chr12:49297285-49351334	.	.	.	.	.	.	protein_coding	ENSG00000255863	.	.
AC073657.1	.	.	.	.	.	.	0	0	0	0	0	0	0	0	0	0	0	0	Uncharacterized protein [Source:UniProtKB/TrEMBL;Acc:M0QY92]	chr15:42066631-42120053	.	.	.	.	.	.	protein_coding	ENSG00000268632	.	.
AC078925.1	.	.	.	.	.	.	0	0	0	0	0	0	0	0	0	0	0	0	Uncharacterized protein [Source:UniProtKB/TrEMBL;Acc:M0R379]	chr12:131438451-131626014	.	.	.	.	.	.	protein_coding	ENSG00000268091	.	.
AC079210.1	.	.	.	.	.	.	0.0849728	0.257395	0.0475855	0.375519	0.224571	0.251868	0.2934	0.365344	0.26369	0.286588	0.322676	0.428362	Uncharacterized protein; cDNA FLJ45097 fis, clone BRAWH3031054 [Source:UniProtKB/TrEMBL;Acc:Q6ZSZ7]	chr17:66508172-66597530	.	.	.	.	.	.	protein_coding	ENSG00000269657	.	.
AC079354.2	.	.	.	.	.	.	0	0	0	0	0	0	0	0	26.3977	0	0	0	Uncharacterized protein [Source:UniProtKB/TrEMBL;Acc:M0QYY5]	chr2:203104291-203104435	.	.	.	.	.	.	protein_coding	ENSG00000267889	.	.
AC083862.1	.	.	.	.	.	.	0	0	0	0	0	0	0	0	0	0	0	0	Uncharacterized protein [Source:UniProtKB/TrEMBL;Acc:H0Y6H1]	chr7:134832796-134855547	.	.	.	.	.	.	protein_coding	ENSG00000229974	.	.
AC087239.1	.	.	.	.	.	.	0	0	0	0	0	0	0	0	0	0	0	0	Uncharacterized protein [Source:UniProtKB/TrEMBL;Acc:M0R1Q5]	chr12:25348149-25403870	.	.	.	.	.	.	protein_coding	ENSG00000268076	.	.
AC087477.1	.	.	.	.	.	.	0	0	0	0	0	0	0	0	0.423697	0	0	0	Uncharacterized protein [Source:UniProtKB/TrEMBL;Acc:M0R2S6]	chr15:96904486-96904900	.	.	.	.	.	.	protein_coding	ENSG00000268484	.	.
AC087645.1	.	.	.	.	.	.	0	0	0.0352892	0	0.0837489	0	0	0	0	0	0	0	Uncharacterized protein [Source:UniProtKB/TrEMBL;Acc:M0R3F9]	chr17:76210266-76221717	.	.	.	.	.	.	protein_coding	ENSG00000268310	.	.
AC090186.1	.	.	.	.	.	.	0	0	0	0	0.180392	0	0	0	0	0	0	0	Uncharacterized protein [Source:UniProtKB/TrEMBL;Acc:Q9HAZ8]	chr8:52730134-52811746	.	.	.	.	.	.	protein_coding	ENSG00000232941	.	.
AC090427.1	.	.	.	.	.	.	0	0	0	0	0	0	0	0	0	0	0	0	Uncharacterized protein [Source:UniProtKB/TrEMBL;Acc:M0R2V6]	chr19:14800880-14889349	.	.	.	.	.	.	protein_coding	ENSG00000268550	.	.
AC090574.1	.	.	.	.	.	.	0	0	0	0	0	0	0	0	0	0	0	0	Uncharacterized protein [Source:UniProtKB/TrEMBL;Acc:M0QYB3]	chr8:70850402-70850635	.	.	.	.	.	.	protein_coding	ENSG00000269197	.	.
AC090673.2	.	.	.	.	.	.	0	0	0	0	0	0	0	0	0	0	0	0	Uncharacterized protein [Source:UniProtKB/TrEMBL;Acc:M0R2U4]	chr12:66217910-66360075	.	.	.	.	.	.	protein_coding	ENSG00000267942	.	.
AC091150.1	.	.	.	.	.	.	0	0	0	0	0	0	0	0	0	0	0	0	HCG1818186; Uncharacterized protein [Source:UniProtKB/TrEMBL;Acc:M0R0Z1]	chr18:45553043-45935793	.	.	.	.	.	.	protein_coding	ENSG00000268960	.	.
AC091948.1	.	.	.	.	.	.	0	0	0	0	0	0	0	0	0	0	0	0	Uncharacterized protein [Source:UniProtKB/TrEMBL;Acc:M0QYF8]	chr5:147698549-147719412	.	.	.	.	.	.	protein_coding	ENSG00000268126	.	.
AC092291.2	.	.	.	.	.	.	0	0	0	0	0	0	0	0	0	0	0	0	.	chr16:14529557-14724133	.	.	.	.	.	.	protein_coding	ENSG00000269049	.	.
AC092384.1	.	.	.	.	.	.	0	0	0	0	0	0	0	0	0	0	0	0	.	chr16:88880141-88929094	.	.	.	.	.	.	protein_coding	ENSG00000269422	.	.
AC092782.1	.	.	.	.	.	.	0	0	0	0	0	0	0	0	0	0	0	0	Uncharacterized protein [Source:UniProtKB/TrEMBL;Acc:M0R1Z1]	chr1:243287729-243418623	.	.	.	.	.	.	protein_coding	ENSG00000269795	.	.
AC092811.1	.	.	.	.	.	.	0	0	0	0	0	0	0	0	0	0	0	0	.	chr1:225589203-225616557	.	.	.	.	.	.	protein_coding	ENSG00000203691	.	.
AC092835.2	.	.	.	.	.	.	0.68389	1.80569	0.847402	0.0208648	0	0	0	0	0.0418016	0	0	0.0417296	.	chr2:95873282-95881351	.	.	.	.	.	.	protein_coding	ENSG00000233757	.	.
AC092850.1	.	.	.	.	.	.	0	0	0	0	0	0	0	0	0	0	0	0	Protein LOC100996701 [Source:UniProtKB/TrEMBL;Acc:M0QZH5]	chr12:131780066-131782763	.	XM_003846260, XM_005275728, XM_005276428	.	.	.	XP_005276485, XP_005275785, XP_003846308	protein_coding	ENSG00000267819	100996701	.
AC092964.1	.	.	.	.	.	.	0	0	0	0	0	0	0	0	0	0	0	0	Uncharacterized protein [Source:UniProtKB/TrEMBL;Acc:H7BZB2]	chr3:171757417-172119455	.	.	.	.	.	.	protein_coding	ENSG00000203443	.	.
AC092964.2	.	.	.	.	.	.	0	0	0	0	0	0	0	0	0	0	0	0	Uncharacterized protein [Source:UniProtKB/TrEMBL;Acc:M0QY75]	chr3:171757417-172119455	.	.	.	.	.	.	protein_coding	ENSG00000267979	.	.
AC093157.1	.	.	.	.	.	.	0	0	0	0	0.0860827	0	0	0	0	0.0552751	0	0	Uncharacterized protein [Source:UniProtKB/TrEMBL;Acc:M0QYT2]	chr1:101455618-101491328	.	.	.	.	.	.	protein_coding	ENSG00000269175	.	.
AC093323.1	.	.	.	.	.	.	0	0	0	0	0	0	0	1.24489	0	0	0	0	Uncharacterized protein [Source:UniProtKB/TrEMBL;Acc:M0QXP9]	chr4:6693781-6694189	.	.	.	.	.	.	protein_coding	ENSG00000268791	.	.
AC096582.1	.	.	.	◎	.	.	0	0	0	0	0.260374	0	0.269137	1.50864	0	0	0	0	Uncharacterized protein [Source:UniProtKB/TrEMBL;Acc:M0QY87]	chr7:45902683-45906045	.	.	.	.	.	.	protein_coding	ENSG00000267988	.	.
AC096644.1	.	.	.	.	.	.	0	0	0	0	0	0	0	0	0	0	0	0	Uncharacterized protein [Source:UniProtKB/TrEMBL;Acc:H7C289]	chr1:220603285-220608023	.	.	.	.	.	.	protein_coding	ENSG00000224867	.	.
AC099344.1	.	.	.	.	.	.	0	0	0	0	0	0	0	0	0	0	0	0	.	chr2:11584500-11606303	.	.	.	.	.	.	protein_coding	ENSG00000269074	.	.
AC103801.2	.	.	.	.	.	.	0.661057	0.702485	0	2.09256	1.06509	1.14381	0.841722	0.768838	0	0	1.96753	2.21759	.	chr11:22644064-22648333	.	.	.	.	.	.	protein_coding	ENSG00000229387	.	.
AC103809.2	.	.	.	.	.	.	0	0	0	0	0	0	0	0	0	0	0	0	Uncharacterized protein; cDNA FLJ33592 fis, clone BRAMY2012691 [Source:UniProtKB/TrEMBL;Acc:Q8N2A4]	chr17:72322350-72351959	.	.	.	.	.	.	protein_coding	ENSG00000268626	.	.
AC104057.1	.	.	.	.	.	.	0	0	0	0	0	0	0	0	0	0	0	0	Protein LOC100996407 [Source:UniProtKB/TrEMBL;Acc:M0QY22]	chr7:65112080-65113280	.	.	.	.	.	.	protein_coding	ENSG00000269558	.	.
AC104304.4	.	.	.	.	.	.	0	0	0	0	0	0	0	0	0	0	0	0	.	chr3:46653924-46668033	NM_001195442	.	.	.	NP_001182371	.	protein_coding	ENSG00000283473	100132146	.
AC104534.3	.	.	.	.	.	.	0.170104	0.153946	0.437224	0.543884	1.27255e-05	1.1027e-05	1.31814e-05	0.46487	1.41771e-05	4.04319e-05	0.439164	0.648605	.	chr19:39306061-39342978	.	.	.	.	.	.	protein_coding	ENSG00000268083	.	.
AC104841.2	.	.	.	.	.	.	0.113955	0.496864	0.237024	1.11938	0.99146	0.782636	0.612578	0.725823	0.486346	0.811854	1.08391	1.15485	HCG1777198, isoform CRA_a; PRO2900; Uncharacterized protein [Source:UniProtKB/TrEMBL;Acc:Q9P1C0]	chr2:242166678-242293442	.	.	.	.	.	.	protein_coding	ENSG00000268485	.	.
AC106017.1	.	.	.	.	.	.	0.445651	0.0922737	0.429152	0.11115	0	0	0	0	0	0	0	0.222299	Uncharacterized protein [Source:UniProtKB/TrEMBL;Acc:F6X152]	chr17:19122673-19125839	.	.	.	.	.	.	protein_coding	ENSG00000230493	.	.
AC107021.1	.	.	.	.	.	.	0	0	0	0	0	0	0	0	0	0	0	0	HCG1786590; PRO2533; Uncharacterized protein [Source:UniProtKB/TrEMBL;Acc:Q9P1D0]	chr3:145782357-145784156	.	.	.	.	.	.	protein_coding	ENSG00000232013	.	.
AC108868.1	.	.	.	.	.	.	0	0	0	0	0	0	0	0	0	0	0	0	.	chr2:107099727-107103848	.	.	.	.	.	.	protein_coding	ENSG00000269000	.	.
AC109583.1	.	.	.	.	.	.	0	0	0	0	0	0	0	0	0	0	0	0	Uncharacterized protein [Source:UniProtKB/TrEMBL;Acc:M0R2G9]	chr3:46919235-46945285	.	.	.	.	.	.	protein_coding	ENSG00000268537	.	.
AC109829.1	.	.	.	.	.	.	0	0.0450947	0	0.115337	0	0	0	0.107835	0.113007	0.137072	0.118466	0.112209	.	chr2:27760252-27790011	.	.	.	.	.	.	protein_coding	ENSG00000233438	.	.
AC110084.1	.	.	.	.	.	.	0	0	0	0	0	0	0	0	0	0	0	0	.	chr2:27994583-28561768	.	.	.	.	.	.	protein_coding	ENSG00000268656	.	.
AC110615.1	.	.	.	.	.	.	0	0	0	0	0	0	0	0	0	0	0	0	Uncharacterized protein [Source:UniProtKB/TrEMBL;Acc:M0R2X6]	chr4:76871068-76912113	.	.	.	.	.	.	protein_coding	ENSG00000268788	.	.
AC110771.1	.	.	.	.	.	.	0	0	0	0.0924488	0.541348	0.193195	0	0	0.70556	0	0	0.184898	Uncharacterized protein [Source:UniProtKB/TrEMBL;Acc:M0R182]	chr4:187111912-187112626	.	.	.	.	.	.	protein_coding	ENSG00000269302	.	.
AC111200.1	.	.	.	.	.	.	0	0	0	0	0	0	0	0	0	0	0	0	.	chr2:87042461-87092827	.	.	.	.	.	.	protein_coding	ENSG00000229615	.	.
AC112205.1	.	.	.	.	.	.	0	0	0	0	0	0	0	0	0	0	0	0	Uncharacterized protein [Source:UniProtKB/TrEMBL;Acc:M0R1V1]	chr5:162864574-162887146	.	.	.	.	.	.	protein_coding	ENSG00000268800	.	.
AC112693.2	.	.	.	.	.	.	0	0.0167068	0	0	0	0	0	0	0	0	0	0	.	chr15:93749294-93751277	.	.	.	.	.	.	protein_coding	ENSG00000269360	.	.
AC114494.1	.	.	.	.	.	.	0	0	0	0	0	0	0	0	0	0	0	0	HCG1787699; Uncharacterized protein [Source:UniProtKB/TrEMBL;Acc:M0R3D0]	chr1:31882411-31907527	.	.	.	.	.	.	protein_coding	ENSG00000268950	.	.
AC114546.1	.	.	.	.	.	.	0	0.0305281	0	0	0	0	0	0	0.0603159	0	0	0	HCG37415; PRO1914; Uncharacterized protein [Source:UniProtKB/TrEMBL;Acc:Q9UHS9]	chr15:35270541-35280488	.	.	.	.	.	.	protein_coding	ENSG00000212768	.	.
AC114783.1	.	.	.	.	.	.	0	0	0	0	0	0	0	0	0	0	0	0	Homo sapiens uncharacterized LOC101929926 (LOC101929926), transcript variant 1, mRNA. [Source:RefSeq mRNA;Acc:NM_001322244]	chr2:127656471-127659673	NM_001322244	XM_011512276, XM_011512275, XM_011512273, XM_011512272, XM_011512270	.	.	NP_001309173	XP_011510572, XP_011510574, XP_011510575, XP_011510577, XP_011510578, XP_016858637, XP_016858639	protein_coding	ENSG00000237524	101929926	.
AC116407.2	.	.	.	.	.	.	0	0	0	0	0	0	0	0	0	0	0	0	Uncharacterized protein [Source:UniProtKB/TrEMBL;Acc:A0PK07]	chr17:30469472-30552789	.	.	.	.	.	.	protein_coding	ENSG00000269402	.	.
AC117395.1	.	.	.	.	.	.	0.351135	0.443293	0.316344	1.3159	1.23291	2.16836	0.896807	1.32745	1.74458	1.13378	1.115	1.5168	LOC646903 protein; Uncharacterized protein [Source:UniProtKB/TrEMBL;Acc:Q96EG4]	chr3:149682690-149768575	.	.	.	.	.	.	protein_coding	ENSG00000268175	.	.
AC117834.1	.	.	.	.	.	.	0	0	0	0	0	0	0	0	0	0	0	0	.	chr8:93895757-94029901	.	.	.	.	.	.	protein_coding	ENSG00000212999	.	.
AC119673.1	.	.	.	.	.	.	0.101587	0.0229556	0.062175	0.0485606	0.0441117	0.0493685	0	0.092621	0.0482422	0.0566714	0.0499225	0.0471988	.	chr1:205681946-205719404	.	.	.	.	.	.	protein_coding	ENSG00000268313	.	.
AC120194.1	.	.	.	.	.	.	0	0	0	0	0	0	0	0	0	0	0	0	.	chr8:71485676-71520604	.	.	.	.	.	.	protein_coding	ENSG00000213002	.	.
AC121757.1	.	.	.	.	.	.	0	0	0	0	0	0	0	0	0	0	0	0	Uncharacterized protein [Source:UniProtKB/TrEMBL;Acc:M0R170]	chr12:52708084-52715182	.	.	.	.	.	.	protein_coding	ENSG00000267873	.	.
AC126614.1	.	.	.	.	.	.	0	0	0	0	0	0	0	0	0	0	0	0	HCG1818482; Uncharacterized protein [Source:UniProtKB/TrEMBL;Acc:M0R0F5]	chr12:57647546-57824788	.	.	.	.	.	.	protein_coding	ENSG00000268367	.	.
AC127496.1	.	.	.	.	.	.	0.293302	0.539708	0.332615	0.947861	0.626226	1.11016	0.591112	0.811217	0.984129	1.00674	1.10297	0.792757	Uncharacterized protein [Source:UniProtKB/TrEMBL;Acc:Q9HBN7]	chr17:78977134-78978932	.	.	.	.	.	.	protein_coding	ENSG00000175911	.	.
AC131097.4	.	.	.	.	.	.	0.0761398	0.0606211	0	0	0	0	0	0	0	0	0	0	.	chr2:242836135-242844702	.	.	.	.	.	.	protein_coding	ENSG00000216921	285095	.
AC131935.1	.	.	.	.	.	.	0	0	0	0	0	0	0	0	0	0	0	0	.	chr11:11747059-11747257	.	.	.	.	.	.	protein_coding	ENSG00000268242	.	.
AC132186.1	.	.	.	.	.	.	0	0	0	0	0	0.0261757	0	0	0	0	0	0	CDNA FLJ27243 fis, clone SYN08134; Uncharacterized protein [Source:UniProtKB/TrEMBL;Acc:Q6ZNS3]	chr16:66461199-66527432	.	.	.	.	.	.	protein_coding	ENSG00000247270	.	.
AC132872.2	.	.	.	.	.	.	0.163307	0.701835	0.662686	0	0	0	0	0	0	0	0	0	CDNA FLJ27256 fis, clone SYN09689; Uncharacterized protein [Source:UniProtKB/TrEMBL;Acc:Q6ZNS0]	chr17:80186281-80231607	.	.	.	.	.	.	protein_coding	ENSG00000268852	.	.
AC135048.1	.	.	.	.	.	.	0	0	0	0.480302	0.385972	0.134427	0.134468	0.124622	0.390451	0	0.282838	0.677766	Uncharacterized protein [Source:UniProtKB/TrEMBL;Acc:Q6PJ53]	chr16:30996527-31000473	.	.	.	.	.	.	protein_coding	ENSG00000268863	.	.
AC135178.1	.	.	.	.	.	.	0.314261	0.268347	0.123099	1.03675	0.249088	0.419046	0.227478	0.169976	0.178261	0.318275	1.01668	1.05682	HCG1985372; Uncharacterized protein; cDNA FLJ37541 fis, clone BRCAN2026340 [Source:UniProtKB/TrEMBL;Acc:Q8N1U9]	chr17:8261730-8263538	.	.	.	.	.	.	protein_coding	ENSG00000198150	.	.
AC135983.2	.	.	.	.	.	.	0	0	0	0	0	0	0	0	0	0	0	0	Protein LOC100996413 [Source:UniProtKB/TrEMBL;Acc:M0R198]	chr15:32774821-32780287	.	XM_003846754	.	.	.	XP_005276534, XP_003960640, XP_003960639, XP_003846802, XP_003846318	protein_coding	ENSG00000268759	100996413	.
AC136297.1	.	.	.	.	.	.	0	0	0	0	0	0	0	0	0	0	0	0	Uncharacterized protein [Source:UniProtKB/TrEMBL;Acc:M0R3D8]	chr11:1295600-1330884	.	.	.	.	.	.	protein_coding	ENSG00000267950	.	.
AC137056.1	.	.	.	.	.	.	0	0	0	0.270821	0.0707203	0.0392501	0	0	0	0	0.278202	0.263441	Uncharacterized protein; cDNA FLJ34659 fis, clone KIDNE2018863 [Source:UniProtKB/TrEMBL;Acc:Q8NAW3]	chr16:20499023-20500981	.	.	.	.	.	.	protein_coding	ENSG00000267824	.	.
AC138393.1	.	.	.	.	.	.	0	0	0	0	0	0	0	0	0	0	0	0	Uncharacterized protein [Source:UniProtKB/TrEMBL;Acc:M0QYQ5]	chr1:224215759-224216371	.	.	.	.	.	.	protein_coding	ENSG00000269358	.	.
AC138517.1	.	.	.	.	.	.	0	0	0	0	0	0	0	0	0	0	0	0	Uncharacterized protein [Source:UniProtKB/TrEMBL;Acc:M0R324]	chr5:138850362-138854357	.	.	.	.	.	.	protein_coding	ENSG00000269071	.	.
AC138517.6	.	.	.	.	.	.	0	0.0123062	0	0	0	0	0	0	0	0	0	0	.	chr5:138850362-138854357	.	.	.	.	.	.	protein_coding	ENSG00000283288	.	.
AC138647.1	.	.	.	.	.	.	0	0	0	0	0	0	0	0	0	0	0	0	.	chr8:142524737-142528837	.	.	.	.	.	.	protein_coding	ENSG00000226490	.	.
AC138655.1	.	.	.	.	.	.	0	0	0	0.0358342	0	0	0	0	0	0	0.0368541	0.0348144	CDNA: FLJ23120 fis, clone LNG07989; HCG1987724; Uncharacterized protein [Source:UniProtKB/TrEMBL;Acc:Q9H5S2]	chr2:47799600-47801998	.	.	.	.	.	.	protein_coding	ENSG00000269563	.	.
AC138969.4	.	.	.	.	.	.	0	0	0	0	0	0	0.105645	0.047246	0	0	0	0	.	chr16:16425733-16444447	.	.	.	.	.	XP_005255542, XP_005255549, XP_006720893, XP_016878327, XP_016879380	protein_coding	ENSG00000183889	9284, 642778, 642799, 101059953, 101059938	.
AC139768.1	.	.	.	.	.	.	0	0	0	0	0	0	0	0	0	0	0	0	Uncharacterized protein [Source:UniProtKB/TrEMBL;Acc:M0R1B3]	chr12:51619859-51620085	.	.	.	.	.	.	protein_coding	ENSG00000269339	.	.
AC140061.12	.	.	.	.	.	.	0	0	0	0	0	0	0	0	0	0	0	0	Uncharacterized protein [Source:UniProtKB/TrEMBL;Acc:M0QZ26]	chr12:50690488-50691718	.	.	.	.	.	.	protein_coding	ENSG00000269529	.	.
AC187652.1	.	.	.	.	.	.	0.0935071	0	0	0	0	0	0	0	0	0	0	0	Protein LOC100996433 [Source:UniProtKB/TrEMBL;Acc:M0R295]	chr7:302917-304070	.	XM_005249921, XM_005276281	.	.	.	XP_005276338, XP_005249978	protein_coding	ENSG00000269396	100996433	.
ACAA1	◎	.	.	◎	.	◎	36.0171	27.9195	27.9581	145.32	101.97	108.26	34.0539	35.6626	81.688	81.069	149.091	141.549	acetyl-CoA acyltransferase 1 [Source:HGNC Symbol;Acc:HGNC:82]	chr3:38080695-38178733	NM_001130410, NM_001607	XM_006713123, XM_006713122	.	.	NP_001123882, NP_001598	XP_006713185, XP_006713186	protein_coding	ENSG00000060971	30	82
ACAA2	.	.	.	.	.	.	16.1936	18.5898	14.0576	96.6072	67.5267	71.5841	38.0837	33.8055	60.5654	61.3005	101.22	91.9943	acetyl-CoA acyltransferase 2 [Source:HGNC Symbol;Acc:HGNC:83]	chr18:47308536-47340330	NM_006111	.	.	.	NP_006102	.	protein_coding	ENSG00000167315	10449	83
ACACA	.	.	.	.	.	.	46.3897	23.4138	34.8005	11.7879	11.9764	11.1891	6.77303	6.42693	7.28068	7.65289	12.0316	11.5441	acetyl-CoA carboxylase alpha [Source:HGNC Symbol;Acc:HGNC:84]	chr17:35441922-35766871	NM_198834, NM_198836, NM_198837, NM_198838, NM_198839	XM_017024555, XM_017024553, XM_011524704, XM_011524703, XM_011524702, XM_011524701, XM_006721853, XM_005257267	.	.	NP_942131, NP_942133, NP_942134, NP_942135, NP_942136	XP_005257324, XP_006721916, XP_011523003, XP_011523004, XP_011523005, XP_011523006, XP_016880042, XP_016880043, XP_016880044	protein_coding	ENSG00000278540	31	84
ACACB	◎	.	.	◎	.	◎	1.48307	0.982911	0.989057	3.51079	2.36751	2.27054	0.660162	0.788551	2.06875	2.01583	3.38365	3.63792	acetyl-CoA carboxylase beta [Source:HGNC Symbol;Acc:HGNC:85]	chr12:109554399-109706031	NM_001093	XM_011538264, XM_011538263, XM_011538262, XM_011538261, XM_011538260, XM_011538259, XM_006719367, XM_006719365, XM_005253876	.	.	NP_001084	XP_005253933, XP_006719428, XP_006719430, XP_011536561, XP_011536562, XP_011536563, XP_011536564, XP_011536565, XP_011536566	protein_coding	ENSG00000076555	32	85
ACAD10	.	.	.	.	.	.	4.03093	1.43643	1.65615	9.65752	6.9222	6.03848	4.56324	5.15308	5.64452	6.27044	9.48675	9.8283	acyl-CoA dehydrogenase family member 10 [Source:HGNC Symbol;Acc:HGNC:21597]	chr12:112123874-112255333	NM_001136538, NM_025247	.	.	.	NP_001130010, NP_079523	.	protein_coding	ENSG00000111271	80724	21597
ACAD11	.	.	.	.	.	.	4.26634	2.14915	3.10928	22.0721	15.742	15.2558	17.3417	17.95	14.019	14.2939	22.811	21.3331	acyl-CoA dehydrogenase family member 11 [Source:HGNC Symbol;Acc:HGNC:30211]	chr3:132276987-132396941	NM_032169	.	.	.	NP_115545	.	protein_coding	ENSG00000240303	84129	30211
ACAD8	.	.	.	.	.	.	8.68767	5.3585	4.89436	8.47647	7.02027	7.58697	8.26498	6.78593	7.97899	9.04819	8.25989	8.69306	acyl-CoA dehydrogenase family member 8 [Source:HGNC Symbol;Acc:HGNC:87]	chr11:134123388-134135749	NM_014384	XM_011542750, XM_005271501	.	.	NP_055199	XP_011541052, XP_016873032	protein_coding	ENSG00000151498	27034	87
ACAD9	.	.	.	.	.	.	34.1558	14.2916	21.0284	9.38066	11.5041	11.1159	7.73881	8.17623	10.27	10.532	9.43712	9.32421	acyl-CoA dehydrogenase family member 9 [Source:HGNC Symbol;Acc:HGNC:21497]	chr3:128598453-128712958	NM_014049	XM_011512742	.	.	NP_054768	.	protein_coding	ENSG00000177646	28976	21497
ACADL	.	.	.	.	.	.	0.0305142	0.0437742	0	0	0	0	0	0	0	0	0	0	acyl-CoA dehydrogenase, long chain [Source:HGNC Symbol;Acc:HGNC:88]	chr2:211052662-211090215	NM_001608	XM_005246517	.	.	NP_001599	XP_005246574	protein_coding	ENSG00000115361	33	88
ACADM	.	.	.	.	.	.	24.3534	21.9171	21.8466	47.3544	40.7182	43.0109	34.8952	36.0398	40.3333	45.1301	48.3789	46.33	acyl-CoA dehydrogenase, C-4 to C-12 straight chain [Source:HGNC Symbol;Acc:HGNC:89]	chr1:76190031-76229364	NM_000016, NM_001127328, NM_001286042, NM_001286043	.	.	.	NP_000007, NP_001120800, NP_001272971, NP_001272972	.	protein_coding	ENSG00000117054	34	89
ACADS	.	.	.	.	.	.	8.10599	3.44982	3.59997	35.6822	22.1351	21.7052	10.1834	12.3194	17.6431	15.0103	37.9398	33.4247	acyl-CoA dehydrogenase, C-2 to C-3 short chain [Source:HGNC Symbol;Acc:HGNC:90]	chr12:121163537-121177811	NM_000017, NM_001302554	.	.	.	NP_000008, NP_001289483	.	protein_coding	ENSG00000122971	35	90
ACADSB	◎	.	.	.	.	◎	0.253832	0.69703	0.776409	58.8427	45.5241	45.0197	21.534	19.9064	39.0689	39.6447	59.1784	58.507	acyl-CoA dehydrogenase, short/branched chain [Source:HGNC Symbol;Acc:HGNC:91]	chr10:124768494-124817827	NM_001609	XM_017016194	.	.	NP_001600	XP_016871683	protein_coding	ENSG00000196177	36	91
ACADVL	.	.	.	.	.	.	118.101	87.0349	119.95	119.251	90.644	86.4676	161.206	169.155	108.681	110.074	118.622	119.881	acyl-CoA dehydrogenase, very long chain [Source:HGNC Symbol;Acc:HGNC:92]	chr17:7093208-7128592	NM_000018, NM_001033859, NM_001270447, NM_001270448	XM_011523830, XM_011523829, XM_006721516	.	.	NP_000009, NP_001029031, NP_001257376, NP_001257377	XP_006721579, XP_011522131, XP_011522132	protein_coding	ENSG00000072778	37	92
ACAN	.	.	.	.	.	.	0	0	0.00785968	0	0	0	0	0	0	0	0	0	aggrecan [Source:HGNC Symbol;Acc:HGNC:319]	chr15:89346673-89418585	NM_001135, NM_013227	XM_017021987, XM_011521314, XM_011521313, XM_006720419	.	.	NP_001126, NP_037359	XP_006720482, XP_011519615, XP_011519616, XP_016877474, XP_016877475, XP_016877476	protein_coding	ENSG00000157766	176	319
ACAP1	.	.	.	.	.	.	2.9341	1.09024	2.80379	1.51344	0.572266	0.697689	0.0928884	0.727987	1.37772	0	2.6991	0.327789	ArfGAP with coiled-coil, ankyrin repeat and PH domains 1 [Source:HGNC Symbol;Acc:HGNC:16467]	chr17:7239847-7254797	NM_014716	XM_005256878	.	.	NP_055531	.	protein_coding	ENSG00000072818	9744	16467
ACAP2	.	.	.	.	.	.	4.49771	16.0967	6.39797	4.91229	4.84862	4.47208	8.20417	8.88655	4.984	5.77176	4.84143	4.98316	ArfGAP with coiled-coil, ankyrin repeat and PH domains 2 [Source:HGNC Symbol;Acc:HGNC:16469]	chr3:194995464-195163807	NM_012287	XM_011512606, XM_011512605, XM_011512604, XM_011512603, XM_011512602, XM_006713557	.	.	NP_036419	XP_006713620, XP_011510904, XP_011510905, XP_011510906, XP_011510907, XP_011510908	protein_coding	ENSG00000114331	23527	16469
ACAP3	◎	.	.	◎	.	◎	16.455	8.0241	10.8446	41.119	29.8831	30.6161	12.7166	13.5736	28.3857	26.2489	40.7749	41.4631	ArfGAP with coiled-coil, ankyrin repeat and PH domains 3 [Source:HGNC Symbol;Acc:HGNC:16754]	chr1:1227755-1243398	NM_030649	XM_011540609, XM_011540608, XM_011540607, XM_011540606, XM_005244715	.	.	NP_085152	XP_005244772, XP_011538908, XP_011538909, XP_011538910, XP_011538911	protein_coding	ENSG00000131584	116983	16754
ACAT1	.	.	.	.	.	.	42.2757	23.737	30.2526	61.542	63.128	63.1639	53.5506	56.3727	56.4296	54.8976	62.5243	60.5597	acetyl-CoA acetyltransferase 1 [Source:HGNC Symbol;Acc:HGNC:93]	chr11:107992242-108018503	NM_000019	.	.	.	NP_000010	.	protein_coding	ENSG00000075239	38	93
ACAT2	◎	◎	.	.	.	◎	117.542	78.1515	74.9634	82.4656	76.6168	71.554	10.0092	9.91224	24.3766	24.4488	84.398	80.5332	acetyl-CoA acetyltransferase 2 [Source:HGNC Symbol;Acc:HGNC:94]	chr6:160090088-160210781	NM_005891	.	.	.	NP_005882	.	protein_coding	ENSG00000120437	39	94
ACBD3	◎	.	.	.	.	◎	9.87	21.95	12.2617	15.6498	17.9151	18.6712	37.672	40.4415	23.3637	24.0277	15.5648	15.7347	acyl-CoA binding domain containing 3 [Source:HGNC Symbol;Acc:HGNC:15453]	chr1:226332379-226374431	NM_022735	.	.	.	NP_073572	.	protein_coding	ENSG00000182827	64746	15453
ACBD4	.	.	.	.	.	.	6.26979	1.08038	1.79361	9.60177	8.19144	8.82583	5.29839	4.65912	7.69584	8.09877	10.4432	8.7603	acyl-CoA binding domain containing 4 [Source:HGNC Symbol;Acc:HGNC:23337]	chr17:43209966-43221548	NM_001135704, NM_001135705, NM_001135706, NM_001135707, NM_001321352, NM_001321353, NM_024722	XM_017025085, XM_011525257, XM_011525256, XM_011525255, XM_006722090, XM_006722089, XM_006722088, XM_006722087, XM_006722085, XM_005257677, XM_005257674, XM_005257673	.	.	NP_001129176, NP_001129177, NP_001129178, NP_001129179, NP_001308281, NP_001308282, NP_078998	XP_005257734, XP_006722148, XP_006722153, XP_016880573, XP_016880574, XP_016880575, XP_016880576, XP_016880577, XP_016880579, XP_016880580, XP_016880581, XP_016880585, XP_016880588	protein_coding	ENSG00000181513	79777	23337
ACBD5	.	.	.	.	.	.	6.12687	9.92889	7.01289	6.06802	5.13542	5.48825	5.54439	6.05019	6.32801	6.13605	6.28978	5.84625	acyl-CoA binding domain containing 5 [Source:HGNC Symbol;Acc:HGNC:23338]	chr10:27484142-27531059	NM_001042473, NM_001271512, NM_001301251, NM_001301252, NM_001301253, NM_001301254, NM_145698	XM_017016908, XM_017016907, XM_017016892, XM_011519760, XM_011519759, XM_006717535, XM_006717533, XM_006717531, XM_006717530, XM_006717528	.	.	NP_001035938, NP_001258441, NP_001288180, NP_001288181, NP_001288182, NP_001288183, NP_663736	XP_006717591, XP_006717593, XP_006717594, XP_006717598, XP_016872376, XP_016872377, XP_016872378, XP_016872380, XP_016872381, XP_016872384, XP_016872385, XP_016872393, XP_016872394, XP_016872396, XP_016872397	protein_coding	ENSG00000107897	91452	23338
ACBD6	.	.	.	.	.	.	63.0484	65.2769	56.9063	21.8682	27.7963	24.733	31.6273	28.6402	25.2639	24.1264	21.5804	22.1559	acyl-CoA binding domain containing 6 [Source:HGNC Symbol;Acc:HGNC:23339]	chr1:180257364-180472089	NM_032360	.	NR_037642	.	NP_115736	.	protein_coding	ENSG00000230124	100527964	23339
ACBD7	◎	.	.	.	.	◎	1.58451	1.21057	4.69305	1.654	2.04546	2.34745	0.730748	0.933302	1.69136	1.31998	1.89715	1.41084	acyl-CoA binding domain containing 7 [Source:HGNC Symbol;Acc:HGNC:17715]	chr10:15119521-15130775	NM_001039844	.	.	.	NP_001034933	.	protein_coding	ENSG00000176244	414149	17715
ACCS	.	.	.	.	.	.	1.34989	0.255214	0.737477	0.636556	0.316644	0.458629	0.300058	0.311564	0.32603	0.406589	0.646848	0.626264	1-aminocyclopropane-1-carboxylate synthase homolog (inactive) [Source:HGNC Symbol;Acc:HGNC:23989]	chr11:44087817-44105764	NM_001127219, NM_032592	XM_011520410, XM_011520409, XM_011520407, XM_011520406, XM_005253170	.	.	NP_001120691, NP_115981	XP_005253227, XP_011518708, XP_011518709, XP_011518712	protein_coding	ENSG00000110455	84680	23989
ACCSL	.	.	.	.	.	.	0	0	0	0.0215615	0.0407692	0	0	0	0	0	0	0.0431231	1-aminocyclopropane-1-carboxylate synthase homolog (inactive) like [Source:HGNC Symbol;Acc:HGNC:34391]	chr11:44069530-44081527	NM_001031854	XM_011520093	.	.	NP_001027025	XP_016873203	protein_coding	ENSG00000205126	390110	34391
ACD	.	.	.	.	.	.	31.1469	23.6867	15.9745	24.6752	23.2119	21.8075	11.3231	13.5184	18.2007	17.2965	23.8431	25.5073	adrenocortical dysplasia homolog [Source:HGNC Symbol;Acc:HGNC:25070]	chr16:67678821-67694718	NM_001082486, NM_001082487, NM_022914	XM_005256115	.	.	NP_001075955, NP_001075956, NP_075065	XP_005256172	protein_coding	ENSG00000102977	65057	25070
ACE	.	.	.	.	.	.	0.278272	0.381942	0.541245	0.0681863	0.01489	0	0.0925697	0.0563311	0.0459112	0.0400939	0.0631036	0.0732689	angiotensin I converting enzyme [Source:HGNC Symbol;Acc:HGNC:2707]	chr17:61554421-61575741	NM_000789, NM_001178057, NM_152830	XM_006721737, XM_005257110	.	.	NP_000780, NP_001171528, NP_690043	XP_006721800	protein_coding	ENSG00000159640	1636	2707
ACE2	.	.	.	.	.	.	0.701775	0.382007	0.162128	0.529717	0.481336	0.193551	0.104433	0.0786399	0.339612	0.305965	0.470157	0.589277	angiotensin I converting enzyme 2 [Source:HGNC Symbol;Acc:HGNC:13557]	chrX:15579155-15620192	NM_021804	XM_011545552, XM_011545551, XM_011545550, XM_011545549	.	.	NP_068576	XP_011543851, XP_011543853, XP_011543854	protein_coding	ENSG00000130234	59272	13557
ACER1	.	.	.	.	.	.	0	0	0	0	0	0	0	0	0	0	0	0	alkaline ceramidase 1 [Source:HGNC Symbol;Acc:HGNC:18356]	chr19:6306152-6333640	NM_133492	.	.	.	NP_597999	.	protein_coding	ENSG00000167769	125981	18356
ACER2	.	.	.	.	.	.	1.13338	1.08611	2.4641	1.05927	0.741913	0.697137	0.805234	0.450316	0.790682	0.76031	0.903374	1.21517	alkaline ceramidase 2 [Source:HGNC Symbol;Acc:HGNC:23675]	chr9:19409056-19452018	NM_001010887	XM_005251447	.	.	NP_001010887	.	protein_coding	ENSG00000177076	340485	23675
ACER3	.	.	.	.	.	.	7.64022	17.5	16.9037	3.96468	3.73433	4.27938	6.38159	6.32695	4.57334	4.0283	3.34293	4.58643	alkaline ceramidase 3 [Source:HGNC Symbol;Acc:HGNC:16066]	chr11:76571916-76737841	NM_001300953, NM_001300954, NM_001300955, NM_018367	XM_011545152, XM_011545151, XM_005274087	.	.	NP_001287882, NP_001287883, NP_001287884, NP_060837	XP_011543453, XP_011543454	protein_coding	ENSG00000078124	55331	16066
ACHE	.	.	.	.	.	.	0.177053	0.697376	0.544589	0.686342	0.621329	0.306877	1.03201	0.874922	0.292649	0.57095	0.926528	0.446155	acetylcholinesterase (Cartwright blood group) [Source:HGNC Symbol;Acc:HGNC:108]	chr7:100487614-100493753	NM_000665, NM_001282449, NM_001302621, NM_001302622, NM_015831	XM_011516229, XM_011516228, XM_011516227, XM_011516225, XM_006715995	.	.	NP_000656, NP_001269378, NP_001289550, NP_001289551, NP_056646	XP_006716058, XP_011514527, XP_011514529, XP_011514530, XP_011514531	protein_coding	ENSG00000087085	43	108
ACIN1	.	.	.	.	.	.	58.438	46.5263	58.721	64.5311	59.6836	60.7535	67.0983	63.5465	65.4883	64.6732	65.3221	63.7401	apoptotic chromatin condensation inducer 1 [Source:HGNC Symbol;Acc:HGNC:17066]	chr14:23527772-23574201	NM_001164814, NM_001164815, NM_001164816, NM_001164817, NM_014977	XM_011536569, XM_005267418, XM_005267416, XM_005267415	.	.	NP_001158286, NP_001158287, NP_001158288, NP_001158289, NP_055792	XP_005267472, XP_005267473, XP_005267475	protein_coding	ENSG00000100813	22985	17066
ACKR1	.	.	.	.	.	.	0	0	0	0	0	0	0	0	0	0	0	0	atypical chemokine receptor 1 (Duffy blood group) [Source:HGNC Symbol;Acc:HGNC:4035]	chr1:159141398-159176290	NM_001122951, NM_002036	.	.	.	NP_001116423, NP_002027	.	protein_coding	ENSG00000213088	2532	4035
ACKR2	.	.	.	.	.	.	0.103005	0.0855447	0.291466	0.858081	0.584313	0.302137	0.29595	0.20594	0.433247	0.487497	1.04866	0.667504	atypical chemokine receptor 2 [Source:HGNC Symbol;Acc:HGNC:1565]	chr3:42850963-42984284	NM_001296	.	.	.	NP_001287	.	protein_coding	ENSG00000144648	1238	1565
ACKR3	.	.	.	.	.	.	11.7229	3.29232	5.64431	0	0	0	0	0	0	0.109346	0	0	atypical chemokine receptor 3 [Source:HGNC Symbol;Acc:HGNC:23692]	chr2:237478283-237491001	NM_020311	XM_011511503, XM_005246098, XM_005246097	.	.	NP_064707	XP_005246154, XP_005246155, XP_011509805, XP_016860005	protein_coding	ENSG00000144476	57007	23692
ACKR4	.	.	.	.	.	.	0	0	0	0.0464645	0	0	0	0	0	0.0543391	0.0477739	0.0451551	atypical chemokine receptor 4 [Source:HGNC Symbol;Acc:HGNC:1611]	chr3:132276987-132396941	NM_016557, NM_178445	.	.	.	NP_057641, NP_848540	.	protein_coding	ENSG00000129048	51554	1611
ACLY	.	.	.	.	.	.	160.084	107.993	102.072	66.1815	54.411	52.6523	39.7383	40.0386	40.6379	37.8706	66.6193	65.7438	ATP citrate lyase [Source:HGNC Symbol;Acc:HGNC:115]	chr17:40023160-40075275	NM_001096, NM_001303274, NM_001303275, NM_198830	XM_017024688, XM_005257395	.	.	NP_001087, NP_001290203, NP_001290204, NP_942127	XP_005257452, XP_016880177	protein_coding	ENSG00000131473	47	115
ACMSD	.	.	.	.	.	.	0	0	0	0	0.11611	0	0	0	0	0.0747473	0	0	aminocarboxymuconate semialdehyde decarboxylase [Source:HGNC Symbol;Acc:HGNC:19288]	chr2:135596116-135659604	NM_001307983, NM_138326	XM_011510592, XM_005263589, XM_005263588, XM_005263587	.	.	NP_001294912, NP_612199	XP_005263644, XP_005263645, XP_005263646, XP_011508894, XP_016858814, XP_016858815	protein_coding	ENSG00000153086	130013	19288
ACO1	.	.	.	.	.	.	12.9063	18.7314	10.0378	16.837	14.2709	14.2112	8.78557	9.47568	11.1767	11.4932	16.7227	16.9514	aconitase 1 [Source:HGNC Symbol;Acc:HGNC:117]	chr9:32384600-32454767	NM_001278352, NM_002197	XM_011517888, XM_005251476	.	.	NP_001265281, NP_002188	XP_005251533, XP_011516190	protein_coding	ENSG00000122729	48	117
ACO2	.	.	.	.	.	.	70.2674	57.2544	46.1256	26.9631	23.5896	21.9961	39.2746	41.0351	25.2226	23.5502	27.8685	26.0576	aconitase 2 [Source:HGNC Symbol;Acc:HGNC:118]	chr22:41865128-41940610	NM_001098	.	.	.	NP_001089	XP_016884301	protein_coding	ENSG00000100412	50	118
ACOD1	.	.	.	.	.	.	0.0150444	0.0787658	0.0609501	0	0	0	0	0	0	0	0	0	aconitate decarboxylase 1 [Source:HGNC Symbol;Acc:HGNC:33904]	chr13:77522631-77532777	NM_001258406	XM_011535211	.	.	NP_001245335	.	protein_coding	ENSG00000102794	730249	33904
ACOT1	◎	.	.	.	.	◎	14.2728	8.9245	14.3209	21.1208	17.9716	18.0972	5.82233	5.33916	8.75243	9.39271	22.3067	19.9349	acyl-CoA thioesterase 1 [Source:HGNC Symbol;Acc:HGNC:33128]	chr14:73945190-74025651	NM_001037161	.	.	.	NP_001032238	.	protein_coding	ENSG00000184227	641371	33128
ACOT11	◎	.	.	◎	.	◎	14.0493	7.19539	7.94934	5.33924	2.95259	3.74147	0.989984	1.32379	2.68579	2.58683	5.28721	5.39127	acyl-CoA thioesterase 11 [Source:HGNC Symbol;Acc:HGNC:18156]	chr1:55013900-55104865	NM_015547, NM_147161	.	.	.	NP_056362, NP_671517	.	protein_coding	ENSG00000162390	26027	18156
ACOT12	.	.	.	.	.	.	0	0	0	0.142113	0.0369955	0.193011	0	0	0.118996	0	0.205719	0.078507	acyl-CoA thioesterase 12 [Source:HGNC Symbol;Acc:HGNC:24436]	chr5:80625823-80689998	NM_130767	XM_011543164, XM_006714531	.	.	NP_570123	XP_006714594, XP_016864534	protein_coding	ENSG00000172497	134526	24436
ACOT13	.	.	.	.	.	.	7.37324	9.11922	4.57861	7.69678	7.59401	7.66316	3.1636	2.77691	6.14996	5.91755	7.5049	7.88865	acyl-CoA thioesterase 13 [Source:HGNC Symbol;Acc:HGNC:20999]	chr6:24667262-24721064	NM_001160094, NM_018473	.	.	.	NP_001153566, NP_060943	.	protein_coding	ENSG00000112304	55856	20999
ACOT2	◎	.	.	.	.	◎	9.52577	4.57481	7.06087	42.0004	35.8974	33.7979	17.701	13.2791	28.6912	25.4609	42.1644	41.8363	acyl-CoA thioesterase 2 [Source:HGNC Symbol;Acc:HGNC:18431]	chr14:74035762-74042362	NM_006821	.	.	.	NP_006812	.	protein_coding	ENSG00000119673	10965	18431
ACOT4	.	.	.	.	.	.	3.16994	2.77138	1.82737	0.0195234	0	0	0.0400963	0	0.038976	0	0	0.0390468	acyl-CoA thioesterase 4 [Source:HGNC Symbol;Acc:HGNC:19748]	chr14:74058409-74063200	NM_152331	.	.	.	NP_689544	.	protein_coding	ENSG00000177465	122970	19748
ACOT6	.	.	.	.	.	.	0	0	0	0.354073	0	0.104067	0	0	0.098841	0	0.51214	0.196005	acyl-CoA thioesterase 6 [Source:HGNC Symbol;Acc:HGNC:33159]	chr14:74083547-74086592	NM_001037162	.	.	.	NP_001032239	.	protein_coding	ENSG00000205669	641372	33159
ACOT7	◎	.	.	.	.	◎	277.86	199.754	209.793	49.604	50.3878	48.7466	22.1311	21.2769	38.4557	37.2054	50.167	49.041	acyl-CoA thioesterase 7 [Source:HGNC Symbol;Acc:HGNC:24157]	chr1:6324328-6454451	NM_007274, NM_181864, NM_181865, NM_181866	.	.	.	NP_009205, NP_863654, NP_863655, NP_863656	.	protein_coding	ENSG00000097021	11332	24157
ACOT8	.	.	.	.	.	.	33.5668	15.555	20.2921	15.7282	15.3998	13.5233	16.0244	14.6655	12.928	14.0368	17.0616	14.3948	acyl-CoA thioesterase 8 [Source:HGNC Symbol;Acc:HGNC:15919]	chr20:44462469-44486045	NM_005469	XM_011528480, XM_005260240, XM_005260239	.	.	NP_005460	XP_005260296, XP_011526782	protein_coding	ENSG00000101473	10005	15919
ACOT9	.	.	.	.	.	.	42.8255	59.9661	74.8599	12.9834	13.145	14.1456	21.8976	24.1174	18.3563	17.0203	12.9464	13.0205	acyl-CoA thioesterase 9 [Source:HGNC Symbol;Acc:HGNC:17152]	chrX:23720369-23784592	NM_001033583, NM_001037171	XM_005274472, XM_005274470	.	.	NP_001028755, NP_001032248	XP_005274529	protein_coding	ENSG00000123130	23597	17152
ACOX1	.	.	.	.	.	.	11.7393	18.6518	10.3947	25.9415	23.6342	25.5397	21.7409	21.6883	22.2106	23.5624	25.7775	26.1055	acyl-CoA oxidase 1 [Source:HGNC Symbol;Acc:HGNC:119]	chr17:73937587-74002080	NM_001185039, NM_004035, NM_007292	XM_011524869, XM_011524868	.	.	NP_001171968, NP_004026, NP_009223	XP_011523170, XP_011523171	protein_coding	ENSG00000161533	51	119
ACOX2	◎	.	.	◎	.	◎	0.240695	0.193795	0.136593	22.6555	18.0412	18.0819	6.04975	6.21322	12.5537	14.9429	22.8358	22.4752	acyl-CoA oxidase 2 [Source:HGNC Symbol;Acc:HGNC:120]	chr3:58490862-58523046	NM_003500	XM_011534147, XM_006713340, XM_005265506, XM_005265505	.	.	NP_003491	XP_005265562, XP_006713403	protein_coding	ENSG00000168306	8309	120
ACOX3	.	.	.	.	.	.	4.5706	3.41627	2.17268	6.91609	5.28266	5.52634	6.26614	6.57211	6.06617	5.42321	7.41786	6.41431	acyl-CoA oxidase 3, pristanoyl [Source:HGNC Symbol;Acc:HGNC:121]	chr4:8368008-8478253	NM_001101667, NM_003501	XM_011513566, XM_011513565, XM_005248013, XM_005248012, XM_005248011	.	.	NP_001095137, NP_003492	XP_005248068, XP_005248070, XP_011511867, XP_011511868	protein_coding	ENSG00000087008	8310	121
ACOXL	.	.	.	.	.	.	2.84577	2.91575	4.79764	0	0	0	0	0	0	0	0	0	acyl-CoA oxidase-like [Source:HGNC Symbol;Acc:HGNC:25621]	chr2:111490149-111875799	NM_001142807	XM_011511432, XM_011511424, XM_011511423, XM_011511422, XM_011511421, XM_011511420, XM_011511419, XM_011511417, XM_011511416, XM_011511415, XM_011511414, XM_011511413, XM_011511412, XM_011511411, XM_011511410, XM_011511409, XM_011511408, XM_011511407, XM_011511406, XM_011511405, XM_011511404	.	.	NP_001136279	XP_011509706, XP_011509707, XP_011509708, XP_011509709, XP_011509711, XP_011509713, XP_011509715, XP_011509716, XP_011509717, XP_011509718, XP_011509721, XP_011509722, XP_011509723, XP_011509724, XP_011509725, XP_011509734	protein_coding	ENSG00000153093	55289	25621
ACP1	.	.	.	.	.	.	65.4257	96.2904	92.024	133.737	194.628	195.229	184.677	177.976	189.782	194.943	131.845	135.63	acid phosphatase 1, soluble [Source:HGNC Symbol;Acc:HGNC:122]	chr2:264868-278283	NM_001040649, NM_004300, NM_007099	XM_011510363	.	.	NP_001035739, NP_004291, NP_009030	XP_011508665	protein_coding	ENSG00000143727	52	122
ACP2	.	.	.	.	.	.	24.0315	18.5036	17.0023	11.7341	9.73887	9.4976	15.2526	15.3685	10.4152	12.5816	12.5411	10.9272	acid phosphatase 2, lysosomal [Source:HGNC Symbol;Acc:HGNC:123]	chr11:47260852-47290583	NM_001302489, NM_001302490, NM_001302491, NM_001302492, NM_001610	.	.	.	NP_001289418, NP_001289419, NP_001289420, NP_001289421, NP_001601	.	protein_coding	ENSG00000134575	53	123
ACP5	.	.	.	.	.	.	15.5688	7.57588	7.05666	1.29914	1.54567	1.24327	0.528307	0.969008	1.45646	0.874906	1.26241	1.33586	acid phosphatase 5, tartrate resistant [Source:HGNC Symbol;Acc:HGNC:124]	chr19:11685474-11689801	NM_001111034, NM_001111035, NM_001111036, NM_001611	XM_011528069, XM_005259939, XM_005259938	.	.	NP_001104504, NP_001104505, NP_001104506, NP_001308952, NP_001602	XP_005259995, XP_005259996, XP_011526371	protein_coding	ENSG00000102575	54	124
ACP6	.	.	.	.	.	.	6.03707	2.27555	3.67483	8.66258	7.53722	9.33198	6.62967	6.47348	8.50599	7.24585	9.45555	7.86962	acid phosphatase 6, lysophosphatidic [Source:HGNC Symbol;Acc:HGNC:29609]	chr1:147114033-147142618	NM_016361	.	.	.	NP_057445	.	protein_coding	ENSG00000162836	51205	29609
ACP7	.	.	.	.	.	.	2.53902	4.66046	4.28855	0	0	0.0305968	0	0.0274315	0	0.0361437	0	0	acid phosphatase 7, tartrate resistant (putative) [Source:HGNC Symbol;Acc:HGNC:33781]	chr19:39574944-39602133	NM_001004318	XM_011526969, XM_011526968, XM_011526967, XM_011526966	.	.	NP_001004318	XP_011525268, XP_011525269, XP_011525271, XP_016882296	protein_coding	ENSG00000183760	390928	33781
ACPP	.	.	.	.	.	.	1.33805	0.801205	3.41282	0	0	0	0	0	0	0	0	0	acid phosphatase, prostate [Source:HGNC Symbol;Acc:HGNC:125]	chr3:132036210-132087142	NM_001099, NM_001134194, NM_001292037	XM_011512947, XM_011512946	.	.	NP_001090, NP_001127666, NP_001278966	XP_011511248, XP_011511249	protein_coding	ENSG00000014257	55	125
ACPT	.	.	.	.	.	.	0	0	0	0.127438	0.0817032	0	0.0864361	0	0.081638	0.106162	0.170629	0.0842469	acid phosphatase, testicular [Source:HGNC Symbol;Acc:HGNC:14376]	chr19:51288982-51298481	NM_033068	.	.	.	NP_149059	.	protein_coding	ENSG00000142513	93650	14376
ACR	.	.	.	.	.	.	0	0	0	0.13542	0.0598543	0.14213	0	0	0	0	0.144615	0.126225	acrosin [Source:HGNC Symbol;Acc:HGNC:126]	chr22:51176623-51183762	NM_001097	.	.	.	NP_001088	.	protein_coding	ENSG00000100312	49	126
ACRBP	.	.	.	.	.	.	0	0.0485658	0.0172673	0.0737526	0.138998	0.0764594	0.116542	0.0683138	0.0872626	0	0.0745048	0.0730004	acrosin binding protein [Source:HGNC Symbol;Acc:HGNC:17195]	chr12:6747240-6756626	NM_032489	.	.	.	NP_115878	.	protein_coding	ENSG00000111644	84519	17195
ACRC	.	.	.	.	.	.	0.254707	1.36803	1.08053	0.134915	0.121742	0.049106	0.155608	0.200747	0.236137	0.253689	0.119817	0.150013	acidic repeat containing [Source:HGNC Symbol;Acc:HGNC:15805]	chrX:70798260-70833433	NM_052957	XM_017029965, XM_011531065, XM_011531064, XM_011531063, XM_006724716	.	.	NP_443189	XP_006724779, XP_011529365, XP_011529366, XP_011529367, XP_011529368, XP_011529369, XP_016885454	protein_coding	ENSG00000147174	93953	15805
ACRV1	.	.	.	.	.	.	0.0152951	0.0318186	0.0420117	0	0	0	0	0	0	0	0	0	acrosomal vesicle protein 1 [Source:HGNC Symbol;Acc:HGNC:127]	chr11:125495030-125551018	NM_001612, NM_020069, NM_020107, NM_020108	.	.	.	NP_001603, NP_064454, NP_064492, NP_064493	.	protein_coding	ENSG00000134940	56	127
ACSBG1	.	.	.	.	.	.	0.120185	0.0777355	0.512166	0.754114	0.675933	0.454852	0.092424	0.0836595	0.197148	0.133296	0.553671	0.954557	acyl-CoA synthetase bubblegum family member 1 [Source:HGNC Symbol;Acc:HGNC:29567]	chr15:78441662-78538030	NM_001199377, NM_015162	XM_011521390	.	.	NP_001186306, NP_055977	XP_011519692, XP_016877514, XP_016877515	protein_coding	ENSG00000103740	23205	29567
ACSBG2	.	.	.	.	.	.	0	0	0	0	0	0.0276793	0	0	0	0	0	0	acyl-CoA synthetase bubblegum family member 2 [Source:HGNC Symbol;Acc:HGNC:24174]	chr19:6135645-6193105	NM_001289177, NM_001289178, NM_001289179, NM_001289180, NM_001321384, NM_030924	XM_017027332, XM_011528328, XM_011528327, XM_006722915, XM_005259653	.	.	NP_001276106, NP_001276107, NP_001276108, NP_001276109, NP_001308313, NP_112186	XP_005259710, XP_011526629, XP_016882821, XP_016882822	protein_coding	ENSG00000130377	81616	24174
ACSF2	◎	.	.	◎	.	◎	68.8968	21.1492	40.0761	32.0088	30.3301	30.4052	4.76555	4.76923	21.9406	20.3025	31.877	32.1405	acyl-CoA synthetase family member 2 [Source:HGNC Symbol;Acc:HGNC:26101]	chr17:48503518-48552198	NM_001288968, NM_001288969, NM_001288970, NM_001288971, NM_001288972, NM_025149	XM_011525294	NR_110232	.	NP_001275897, NP_001275898, NP_001275899, NP_001275900, NP_001275901, NP_079425	XP_011523596	protein_coding	ENSG00000167107	80221	26101
ACSF3	.	.	.	.	.	.	11.9992	3.92231	5.69243	10.3848	9.32991	8.71814	8.49614	10.2023	8.81389	7.71364	10.7767	9.99286	acyl-CoA synthetase family member 3 [Source:HGNC Symbol;Acc:HGNC:27288]	chr16:89160216-89222254	NM_001127214, NM_001243279, NM_001284316, NM_174917	XM_005256293	NR_045667	.	NP_001120686, NP_001230208, NP_001271245, NP_777577	XP_005256350, XP_016878508	protein_coding	ENSG00000176715	197322	27288
ACSL1	.	.	.	.	.	.	10.3459	8.64889	15.8428	30.3293	16.1827	15.7302	30.2051	30.5166	17.6239	17.5156	31.0216	29.637	acyl-CoA synthetase long-chain family member 1 [Source:HGNC Symbol;Acc:HGNC:3569]	chr4:185676748-185747972	NM_001286708, NM_001286710, NM_001286711, NM_001286712, NM_001995	XM_017007889, XM_017007888, XM_017007887, XM_011531742, XM_011531741, XM_011531740, XM_005262831, XM_005262829, XM_005262828	.	.	NP_001273637, NP_001273639, NP_001273640, NP_001273641, NP_001986	XP_005262885, XP_005262886, XP_005262888, XP_011530042, XP_011530043, XP_011530044, XP_016863376, XP_016863377, XP_016863378	protein_coding	ENSG00000151726	2180	3569
ACSL3	.	.	.	.	.	.	66.0632	83.2077	119.772	60.6706	103.102	100.14	114.534	114.134	80.5718	79.8374	60.0701	61.2711	acyl-CoA synthetase long-chain family member 3 [Source:HGNC Symbol;Acc:HGNC:3570]	chr2:223725651-223809357	NM_004457, NM_203372	.	.	.	NP_004448, NP_976251	XP_016859073	protein_coding	ENSG00000123983	2181	3570
ACSL4	.	.	.	.	.	.	8.07585	17.9799	12.7741	73.2758	97.3984	93.8603	70.5306	71.5604	74.9447	74.8997	74.3222	72.2294	acyl-CoA synthetase long-chain family member 4 [Source:HGNC Symbol;Acc:HGNC:3571]	chrX:108884565-108976632	NM_001318509, NM_001318510, NM_004458, NM_022977	XM_011530889, XM_011530888, XM_006724635, XM_005262110, XM_005262109, XM_005262108	.	.	NP_001305438, NP_001305439, NP_004449, NP_075266	XP_005262165, XP_005262166, XP_005262167, XP_006724698, XP_011529190, XP_011529191	protein_coding	ENSG00000068366	2182	3571
ACSL5	◎	.	.	◎	.	◎	0.645257	0.85195	0.321156	112.737	63.286	62.3075	139.918	147.915	70.1151	66.3245	115.196	110.277	acyl-CoA synthetase long-chain family member 5 [Source:HGNC Symbol;Acc:HGNC:16526]	chr10:114133775-114206675	NM_016234, NM_203379, NM_203380	XM_017016324	.	.	NP_057318, NP_976313, NP_976314	XP_016871813	protein_coding	ENSG00000197142	51703	16526
ACSL6	◎	.	◎	◎	.	◎	0.0154261	0.041092	0	1.12604	3.32285	3.76891	0.331066	0.165536	3.48885	3.10242	0.924795	1.32728	acyl-CoA synthetase long-chain family member 6 [Source:HGNC Symbol;Acc:HGNC:16496]	chr5:131285665-131347779	NM_001009185, NM_001205247, NM_001205248, NM_001205250, NM_001205251, NM_015256	.	.	.	NP_001009185, NP_001192176, NP_001192177, NP_001192179, NP_001192180, NP_056071	.	protein_coding	ENSG00000164398	23305	16496
ACSM1	.	.	.	.	.	.	0	0	0.0374778	0.742832	0.613752	0.651299	0.0762131	0.156897	0.428457	0.281186	0.645737	0.839927	acyl-CoA synthetase medium-chain family member 1 [Source:HGNC Symbol;Acc:HGNC:18049]	chr16:20634558-20709066	NM_001318890, NM_052956	XM_006721017, XM_006721016, XM_005255084	.	.	NP_001305819, NP_443188	XP_005255141, XP_006721079, XP_006721080	protein_coding	ENSG00000166743	116285	18049
ACSM2A	◎	◎	◎	◎	◎	◎	0	0	0	9.74991	4.53892	5.10896	0.359555	0.290312	1.65757	2.24697	9.60014	9.89968	acyl-CoA synthetase medium-chain family member 2A [Source:HGNC Symbol;Acc:HGNC:32017]	chr16:20462893-20498989	NM_001010845, NM_001308169, NM_001308172	XM_017022923, XM_011545733, XM_005255093	.	.	NP_001010845, NP_001295098, NP_001295101, NP_001295883	XP_005255150, XP_011544035, XP_016878412	protein_coding	ENSG00000183747	123876	32017
ACSM2B	◎	◎	.	◎	.	◎	0	0	0	20.3477	11.1058	12.3795	0.784782	0.698831	5.09013	6.06968	19.315	21.3803	acyl-CoA synthetase medium-chain family member 2B [Source:HGNC Symbol;Acc:HGNC:30931]	chr16:20547547-20587689	NM_001105069, NM_182617	XM_011545824	.	.	NP_001098539, NP_872423	XP_011544126	protein_coding	ENSG00000066813	348158	30931
ACSM3	◎	.	.	.	.	◎	0.258832	0.0387479	0.0883806	29.6125	16.8485	17.3229	7.99253	8.09854	14.0623	14.4175	29.6305	29.5945	acyl-CoA synthetase medium-chain family member 3 [Source:HGNC Symbol;Acc:HGNC:10522]	chr16:20775023-20936328	NM_005622, NM_202000	XM_011545912, XM_011545911	.	.	NP_005613, NP_973729	XP_011544213, XP_016879012	protein_coding	ENSG00000005187	6296	10522
ACSM4	.	.	.	.	.	.	0	0	0	0	0	0	0	0	0	0	0	0	acyl-CoA synthetase medium-chain family member 4 [Source:HGNC Symbol;Acc:HGNC:32016]	chr12:7456879-7481320	NM_001080454	.	.	.	NP_001073923	.	protein_coding	ENSG00000215009	341392	32016
ACSM5	◎	.	.	◎	.	◎	0	0	0	13.8333	8.13561	8.18721	1.07327	1.25788	4.94074	5.37379	13.1662	14.5004	acyl-CoA synthetase medium-chain family member 5 [Source:HGNC Symbol;Acc:HGNC:26060]	chr16:20420855-20452658	NM_001324371, NM_001324372, NM_001324373, NM_017888	XM_006721056, XM_006721055	.	.	NP_001311300, NP_001311301, NP_001311302, NP_060358	XP_006721119	protein_coding	ENSG00000183549	54988	26060
ACSM6	.	.	.	.	.	.	0	0	0	0.0254337	0	0	0	0	0	0	0.0508673	0	acyl-CoA synthetase medium-chain family member 6 [Source:HGNC Symbol;Acc:HGNC:31665]	chr10:96953956-96988685	NM_207321	.	.	.	NP_997204	.	protein_coding	ENSG00000173124	142827	31665
ACSS1	.	.	.	.	.	.	3.92897	1.07714	1.72281	63.5172	41.6967	41.129	27.1353	27.7858	42.1668	42.4091	62.7117	64.3227	acyl-CoA synthetase short-chain family member 1 [Source:HGNC Symbol;Acc:HGNC:16091]	chr20:24986865-25039616	NM_001252675, NM_001252676, NM_001252677, NM_032501	XM_011529388	.	.	NP_001239604, NP_001239605, NP_001239606, NP_115890	XP_011527690	protein_coding	ENSG00000154930	84532	16091
ACSS2	◎	.	.	.	.	◎	48.1005	34.8671	23.8651	34.5442	19.2363	18.9937	8.4308	8.40007	9.78877	10.6242	33.9132	35.1751	acyl-CoA synthetase short-chain family member 2 [Source:HGNC Symbol;Acc:HGNC:15814]	chr20:33464237-33515765	NM_001076552, NM_001242393, NM_018677	XM_011528912, XM_011528911, XM_011528910, XM_011528908, XM_011528907, XM_011528906, XM_011528905, XM_006723826, XM_005260456, XM_005260455	.	.	NP_001070020, NP_001229322, NP_061147	XP_005260512, XP_005260513, XP_006723889, XP_011527207, XP_011527208, XP_011527209, XP_011527210, XP_011527211, XP_011527213, XP_011527214	protein_coding	ENSG00000131069	55902	15814
ACSS3	.	.	.	.	.	.	0	0.0255028	0.0247439	32.7799	38.8449	39.2298	24.8267	24.81	36.7481	36.4087	33.7589	31.801	acyl-CoA synthetase short-chain family member 3 [Source:HGNC Symbol;Acc:HGNC:24723]	chr12:81470989-82153109	NM_024560	XM_005269150	.	.	NP_078836	XP_005269207	protein_coding	ENSG00000111058	79611	24723
ACTA1	.	.	.	.	.	.	0.135148	0.265098	0.0534226	0.037358	1.07522	0.929656	1.14381	1.32417	1.03043	1.31234	0.0747159	0	actin, alpha 1, skeletal muscle [Source:HGNC Symbol;Acc:HGNC:129]	chr1:229566991-229569845	NM_001100	.	.	.	NP_001091	.	protein_coding	ENSG00000143632	58	129
ACTA2	◎	.	.	◎	.	◎	3.43113	0.243214	1.24771	28.4532	16.5455	16.1084	4.91172	4.35444	10.1496	10.9426	30.8716	26.0348	actin, alpha 2, smooth muscle, aorta [Source:HGNC Symbol;Acc:HGNC:130]	chr10:90639490-90734910	NM_001141945, NM_001613	XM_011540016	.	.	NP_001135417, NP_001307784, NP_001604	XP_011538318	protein_coding	ENSG00000107796	59	130
ACTB	.	.	.	.	.	.	3598.94	3752.74	3091.55	394.344	628.753	583.464	592.79	623.823	650.564	565.879	403.124	385.564	actin beta [Source:HGNC Symbol;Acc:HGNC:132]	chr7:5566781-5570340	NM_001101	.	.	.	NP_001092	.	protein_coding	ENSG00000075624	60	132
ACTBL2	.	.	.	.	.	.	0.0509001	0.108917	0.140207	0	0	0	0	0	0	0	0	0	actin, beta like 2 [Source:HGNC Symbol;Acc:HGNC:17780]	chr5:56775842-56778636	NM_001017992	.	.	.	NP_001017992	.	protein_coding	ENSG00000169067	345651	17780
ACTC1	.	.	.	.	.	.	0.00880372	0.0322418	0.00811697	0	0	0	0	0	0	0	0	0	actin, alpha, cardiac muscle 1 [Source:HGNC Symbol;Acc:HGNC:143]	chr15:35080296-35088340	NM_005159	.	.	.	NP_005150	.	protein_coding	ENSG00000159251	70	143
ACTG1	.	.	.	.	.	.	2922.57	3773.33	2591.68	375.791	701.328	654.829	1243.17	1256.43	886.083	849.63	384.112	367.469	actin gamma 1 [Source:HGNC Symbol;Acc:HGNC:144]	chr17:79476996-79479900	NM_001199954, NM_001614	.	.	.	NP_001186883, NP_001605	.	protein_coding	ENSG00000184009	71	144
ACTG2	.	.	.	.	.	.	1.06165	1.81153	1.31717	0	0	0.117687	0	0.164802	0.0573219	0.0702064	0	0	actin, gamma 2, smooth muscle, enteric [Source:HGNC Symbol;Acc:HGNC:145]	chr2:74120093-74146992	NM_001199893, NM_001615	.	.	.	NP_001186822, NP_001606	.	protein_coding	ENSG00000163017	72	145
ACTL10	.	.	.	.	.	.	4.41136	1.46336	2.29627	0	0	0	0	0	0	0	0	0	actin like 10 [Source:HGNC Symbol;Acc:HGNC:16127]	chr20:32244892-32262269	NM_001024675	.	.	.	NP_001019846	.	protein_coding	ENSG00000182584	170487	16127
ACTL6A	.	.	.	.	.	.	59.164	42.5315	55.024	28.221	38.0135	37.3984	37.5395	36.4821	34.5721	34.9731	29.4265	27.0155	actin like 6A [Source:HGNC Symbol;Acc:HGNC:24124]	chr3:179280667-179322442	NM_004301, NM_177989, NM_178042	.	.	.	NP_004292, NP_817126, NP_829888	.	protein_coding	ENSG00000136518	86	24124
ACTL6B	.	.	.	.	.	.	0	0	0	0	0	0	0	0	0	0	0	0	actin like 6B [Source:HGNC Symbol;Acc:HGNC:160]	chr7:100240719-100254084	NM_016188	.	.	.	NP_057272	.	protein_coding	ENSG00000077080	51412	160
ACTL7A	.	.	.	.	.	.	0	0	0	0	0	0	0	0	0	0	0	0	actin like 7A [Source:HGNC Symbol;Acc:HGNC:161]	chr9:111624545-111626039	NM_006687	.	.	.	NP_006678	.	protein_coding	ENSG00000187003	10881	161
ACTL7B	.	.	.	.	.	.	0.0156388	0.0134264	0.0144436	0.0381082	0	0	0	0	0.0373965	0	0	0.0762163	actin like 7B [Source:HGNC Symbol;Acc:HGNC:162]	chr9:111616868-111619247	NM_006686	.	.	.	NP_006677	.	protein_coding	ENSG00000148156	10880	162
ACTL8	.	.	.	.	.	.	0.928317	0.107351	0.130796	0	0.150063	0.0607439	0	0	0.170809	0.0710171	0	0	actin like 8 [Source:HGNC Symbol;Acc:HGNC:24018]	chr1:18081807-18153558	NM_030812	XM_011542214, XM_011542213, XM_011542212	.	.	NP_110439	XP_011540514, XP_011540515, XP_011540516	protein_coding	ENSG00000117148	81569	24018
ACTL9	.	.	.	.	.	.	0	0	0	0	0	0	0	0	0	0	0	0	actin like 9 [Source:HGNC Symbol;Acc:HGNC:28494]	chr19:8807746-8809172	NM_178525	.	.	.	NP_848620	.	protein_coding	ENSG00000181786	284382	28494
ACTN1	.	.	.	.	.	.	224.581	224.165	269.847	35.4324	40.4366	39.6242	47.7171	50.8934	47.7091	45.1424	34.6848	36.18	actinin alpha 1 [Source:HGNC Symbol;Acc:HGNC:163]	chr14:69340859-69446157	NM_001102, NM_001130004, NM_001130005	XM_017021727, XM_011537271, XM_011537270, XM_011537269, XM_011537268, XM_011537267, XM_011537266, XM_011537265	.	.	NP_001093, NP_001123476, NP_001123477	XP_011535567, XP_011535568, XP_011535569, XP_011535570, XP_016877216, XP_016877217	protein_coding	ENSG00000072110	87	163
ACTN2	.	.	.	.	.	.	0.131653	0.282727	0.0836752	0.0321779	0.0293741	0.0163563	0	0	0.046675	0	0.0643559	0	actinin alpha 2 [Source:HGNC Symbol;Acc:HGNC:164]	chr1:236849753-236927931	NM_001103, NM_001278343, NM_001278344	.	.	.	NP_001094, NP_001265272, NP_001265273	.	protein_coding	ENSG00000077522	88	164
ACTN3	.	.	.	.	.	.	0.0382079	0.0344728	0.0269188	0.012121	0	0	0	0	0	0	0	0.024242	actinin alpha 3 (gene/pseudogene) [Source:HGNC Symbol;Acc:HGNC:165]	chr11:66313865-66330800	NM_001104, NM_001258371	.	.	.	NP_001095, NP_001245300	.	protein_coding	ENSG00000248746	89	165
ACTN4	.	.	.	.	.	.	220.686	212.192	281.333	165.648	148.739	150.302	89.23	88.4509	141.801	135.642	163.202	168.094	actinin alpha 4 [Source:HGNC Symbol;Acc:HGNC:166]	chr19:39138309-39260544	NM_004924	XM_006723406, XM_005259282, XM_005259281	.	.	NP_001308962, NP_004915	XP_005259338, XP_006723469, XP_016882820	protein_coding	ENSG00000130402	81	166
ACTR10	.	.	.	.	.	.	27.6216	39.4839	27.2765	17.3583	16.1004	17.9634	17.4155	19.4002	17.0542	17.1893	17.1838	17.5327	actin-related protein 10 homolog [Source:HGNC Symbol;Acc:HGNC:17372]	chr14:58666855-58702354	NM_018477	XM_011536961, XM_011536960	.	.	NP_060947	XP_011535262, XP_011535263	protein_coding	ENSG00000131966	55860	17372
ACTR1A	.	.	.	.	.	.	105.61	104.97	95.9	29.7858	25.7021	26.2035	30.4038	29.8467	25.6244	26.6307	29.9259	29.6456	ARP1 actin-related protein 1 homolog A, centractin alpha [Source:HGNC Symbol;Acc:HGNC:167]	chr10:104238985-104262468	NM_005736	.	.	.	NP_005727	.	protein_coding	ENSG00000138107	10121	167
ACTR1B	.	.	.	.	.	.	30.243	9.03631	23.6472	42.4603	35.5827	35.9114	22.146	22.0489	33.3492	32.2941	41.4035	43.5171	ARP1 actin-related protein 1 homolog B, centractin beta [Source:HGNC Symbol;Acc:HGNC:168]	chr2:98272425-98280570	NM_005735	XM_005263854	.	.	NP_005726	XP_005263911	protein_coding	ENSG00000115073	10120	168
ACTR2	.	.	.	.	.	.	82.1657	121.823	104.85	104.426	111.151	114.229	108.676	111.728	110.999	119.423	105.894	102.958	ARP2 actin related protein 2 homolog [Source:HGNC Symbol;Acc:HGNC:169]	chr2:65454886-65498387	NM_001005386, NM_005722	.	.	.	NP_001005386, NP_005713	.	protein_coding	ENSG00000138071	10097	169
ACTR3	.	.	.	.	.	.	92.8072	183.886	132.857	68.1243	74.2314	78.2583	116.169	117.114	95.8682	89.7216	68.0418	68.2069	ARP3 actin related protein 3 homolog [Source:HGNC Symbol;Acc:HGNC:170]	chr2:114647536-114720173	NM_001277140, NM_005721	.	.	.	NP_001264069, NP_005712	.	protein_coding	ENSG00000115091	10096	170
ACTR3B	.	.	.	.	.	.	4.26447	1.45835	2.97366	6.03847	6.99693	6.66302	7.26244	5.90988	6.24255	7.24741	6.83756	5.23937	ARP3 actin related protein 3 homolog B [Source:HGNC Symbol;Acc:HGNC:17256]	chr7:152456833-152552463	NM_001040135, NM_020445	XM_011516428, XM_006716068	.	.	NP_001035225, NP_065178	XP_011514729, XP_016867950	protein_coding	ENSG00000133627	57180	17256
ACTR3C	.	.	.	.	.	.	2.78545	2.9753	1.85577	0.786714	0.530357	0.532631	0.379954	1.06797	0.889998	0.73161	0.539886	1.03354	ARP3 actin-related protein 3 homolog C [Source:HGNC Symbol;Acc:HGNC:37282]	chr7:149941007-150000069	NM_001164458, NM_001164459	XM_011516514, XM_011516513, XM_011516512, XM_011516511, XM_011516510, XM_011516509, XM_011516508, XM_011516507, XM_011516506, XM_011516505, XM_011516504, XM_011516503, XM_005250043	.	.	NP_001157930, NP_001157931	XP_005250100, XP_011514808, XP_011514809, XP_011514810, XP_011514813, XP_016868038, XP_016868039, XP_016868040	protein_coding	ENSG00000106526	653857	37282
ACTR5	.	.	.	.	.	.	20.1402	12.5903	15.5303	10.2059	9.98015	9.41164	7.97938	7.27874	7.72788	9.91229	10.6683	9.74358	ARP5 actin-related protein 5 homolog [Source:HGNC Symbol;Acc:HGNC:14671]	chr20:37377084-37401163	NM_024855	XM_005260555, XM_005260554	.	.	NP_079131	.	protein_coding	ENSG00000101442	79913	14671
ACTR6	.	.	.	.	.	.	8.73226	18.4599	11.1985	11.7619	11.3281	12.8359	15.7949	16.7667	13.4428	12.1849	11.0725	12.4513	ARP6 actin-related protein 6 homolog [Source:HGNC Symbol;Acc:HGNC:24025]	chr12:100593864-100618202	NM_022496	.	.	.	NP_071941	XP_016875310	protein_coding	ENSG00000075089	64431	24025
ACTR8	.	.	.	.	.	.	5.35276	6.20159	7.1895	11.1138	11.0202	12.06	13.3	13.2911	11.4024	11.3341	10.7874	11.4402	ARP8 actin-related protein 8 homolog [Source:HGNC Symbol;Acc:HGNC:14672]	chr3:53901092-53916229	NM_022899	XM_011534250, XM_011534249, XM_006713419, XM_005265587	.	.	NP_075050	XP_005265644, XP_006713482, XP_011532551	protein_coding	ENSG00000113812	93973	14672
ACTRT1	.	.	.	.	.	.	0	0	0	0.026626	0	0	0	0.0506541	0.0531769	0	0	0.0532521	actin related protein T1 [Source:HGNC Symbol;Acc:HGNC:24027]	chrX:127184940-127186377	NM_138289	.	.	.	NP_612146	.	protein_coding	ENSG00000123165	139741	24027
ACTRT2	.	.	.	.	.	.	0	0	0	0	0	0	0	0	0	0	0	0	actin related protein T2 [Source:HGNC Symbol;Acc:HGNC:24026]	chr1:2938046-2939467	NM_080431	.	.	.	NP_536356	.	protein_coding	ENSG00000169717	140625	24026
ACTRT3	.	.	.	.	.	.	2.72646	3.41118	2.55651	0.357615	0.48291	0.631363	0.336143	0.443786	0.698489	0.395415	0.483441	0.23179	actin related protein T3 [Source:HGNC Symbol;Acc:HGNC:24022]	chr3:169484708-169487683	NM_032487	.	.	.	NP_115876	.	protein_coding	ENSG00000184378	84517	24022
ACVR1	.	.	.	.	.	.	3.31622	12.3508	7.79595	5.8011	7.08418	7.54365	13.8753	14.7062	8.7217	8.57632	6.26631	5.33589	activin A receptor type 1 [Source:HGNC Symbol;Acc:HGNC:171]	chr2:158592955-158732374	NM_001105, NM_001111067	XM_011512108, XM_011512107, XM_011512106, XM_006712825, XM_005246940, XM_005246939	.	.	NP_001096, NP_001104537	XP_005246996, XP_005246997, XP_006712888, XP_011510408, XP_011510409, XP_011510410	protein_coding	ENSG00000115170	90	171
ACVR1B	.	.	.	.	.	.	12.8373	8.19961	11.0567	9.15225	8.05169	7.27654	7.49207	7.11365	8.42679	8.4874	8.98824	9.31627	activin A receptor type 1B [Source:HGNC Symbol;Acc:HGNC:172]	chr12:52345450-52390862	NM_004302, NM_020327, NM_020328	.	.	.	NP_004293, NP_064732, NP_064733	XP_016875688, XP_016875689	protein_coding	ENSG00000135503	91	172
ACVR1C	.	.	.	.	.	.	0.0158655	0.345513	0.264317	0.11419	0.19046	0.293007	0.0452754	0.122957	0.133846	0.205853	0.131378	0.0970013	activin A receptor type 1C [Source:HGNC Symbol;Acc:HGNC:18123]	chr2:158383278-158485517	NM_001111031, NM_001111032, NM_001111033, NM_145259	.	.	.	NP_001104501, NP_001104502, NP_001104503, NP_660302	.	protein_coding	ENSG00000123612	130399	18123
ACVR2A	.	.	.	.	.	.	1.8766	4.16356	2.65267	4.94808	5.33514	5.83377	5.66833	7.0216	5.39921	6.45871	5.33896	4.55721	activin A receptor type 2A [Source:HGNC Symbol;Acc:HGNC:173]	chr2:148602085-149274540	NM_001278579, NM_001278580, NM_001616	.	.	.	NP_001265508, NP_001265509, NP_001607	.	protein_coding	ENSG00000121989	92	173
ACVR2B	.	.	.	.	.	.	0.729617	0.828843	1.06587	5.49004	5.29521	5.44423	5.65266	5.79742	5.96405	5.6041	5.37306	5.60702	activin A receptor type 2B [Source:HGNC Symbol;Acc:HGNC:174]	chr3:38495341-38534633	NM_001106	XM_017007515, XM_005265583	.	.	NP_001097	XP_005265640, XP_016863003, XP_016863004, XP_016863005	protein_coding	ENSG00000114739	93	174
ACVRL1	.	.	.	.	.	.	0	0	0	0	0	0	0	0	0	0	0	0	activin A receptor like type 1 [Source:HGNC Symbol;Acc:HGNC:175]	chr12:52301201-52317143	NM_000020, NM_001077401	XM_011539008, XM_005269235	.	.	NP_000011, NP_001070869	XP_005269292, XP_011537310	protein_coding	ENSG00000139567	94	175
ACY1	◎	.	.	.	.	◎	26.6377	3.13613	5.84165	46.5401	54.8802	48.6083	25.7679	25.8276	41.3423	41.2723	49.5219	43.5583	aminoacylase 1 [Source:HGNC Symbol;Acc:HGNC:177]	chr3:52002525-52023218	NM_000666, NM_001198895, NM_001198896, NM_001198897, NM_001198898	.	.	.	NP_000657, NP_001185824, NP_001185825, NP_001185826, NP_001185827	.	protein_coding	ENSG00000243989	95	177
ACY3	◎	.	.	◎	.	◎	0	0	0.0282035	14.7188	10.3722	10.0602	1.21607	1.59467	6.23778	5.39777	14.8147	14.6229	aminoacylase 3 [Source:HGNC Symbol;Acc:HGNC:24104]	chr11:67410025-67418130	NM_080658	XM_011545351, XM_011545350, XM_011545349	.	.	NP_542389	XP_011543651, XP_011543653, XP_016874038, XP_016874039, XP_016874040	protein_coding	ENSG00000132744	91703	24104
ACYP1	.	.	.	.	.	.	11.3374	11.8183	25.8731	5.86402	7.18282	9.52443	7.19156	7.82531	8.36529	9.10326	5.69859	6.02944	acylphosphatase 1 [Source:HGNC Symbol;Acc:HGNC:179]	chr14:75519923-75593783	NM_001107, NM_001302616, NM_001302617	.	.	.	NP_001098, NP_001289545, NP_001289546	.	protein_coding	ENSG00000119640	97	179
ACYP2	.	.	.	.	.	.	4.5391	4.08977	5.71668	21.4969	20.4643	21.052	12.453	10.4171	15.5972	13.0584	24.6103	18.3836	acylphosphatase 2 [Source:HGNC Symbol;Acc:HGNC:180]	chr2:54091203-54532437	NM_001320590, NM_138448	.	.	.	NP_001307515, NP_001307519, NP_612457	.	protein_coding	ENSG00000170634	98	180
ADA	.	.	.	.	.	.	40.0942	11.3867	14.8609	1.23544	2.16787	1.94532	1.57266	2.13999	1.76648	1.43965	1.19953	1.27135	adenosine deaminase [Source:HGNC Symbol;Acc:HGNC:186]	chr20:43160425-43280383	NM_000022	XM_011528478, XM_005260236	.	.	NP_000013, NP_001308980	XP_005260293	protein_coding	ENSG00000196839	100	186
ADAD1	.	.	.	.	.	.	0.0189837	0.0720852	0.0861248	0	0	0	0	0	0	0	0	0	adenosine deaminase domain containing 1 [Source:HGNC Symbol;Acc:HGNC:30713]	chr4:123300167-123350957	NM_001159285, NM_001159295, NM_139243	XM_011531603, XM_005262745, XM_005262744, XM_005262743, XM_005262741	.	.	NP_001152757, NP_001152767, NP_640336	XP_005262798, XP_005262800, XP_005262801, XP_005262802, XP_011529905	protein_coding	ENSG00000164113	132612	30713
ADAD2	.	.	.	.	.	.	0.021503	0	0.0205443	0	0	0	0.054693	0.0494819	0	0	0	0	adenosine deaminase domain containing 2 [Source:HGNC Symbol;Acc:HGNC:30714]	chr16:84224743-84230772	NM_001145400, NM_139174	XM_011522920, XM_011522919, XM_005255814	.	.	NP_001138872, NP_631913	XP_005255871, XP_011521221, XP_011521222	protein_coding	ENSG00000140955	161931	30714
ADAL	.	.	.	.	.	.	2.2173	2.48092	2.98038	5.83934	6.98927	6.27137	5.0311	6.50798	6.21376	7.47775	5.82404	5.85464	adenosine deaminase like [Source:HGNC Symbol;Acc:HGNC:31853]	chr15:43622871-43646753	NM_001012969, NM_001159280	XM_011521297, XM_011521296, XM_011521295, XM_011521293, XM_011521292, XM_011521291, XM_005254204	.	.	NP_001012987, NP_001152752, NP_001311293, NP_001311294, NP_001311295, NP_001311297	XP_005254261, XP_011519593, XP_011519594, XP_011519595, XP_016877453, XP_016877454, XP_016877455, XP_016877456	protein_coding	ENSG00000168803	161823	31853
ADAM10	.	.	.	.	.	.	11.2834	10.6594	14.2187	20.3334	25.5589	23.2778	19.2195	20.3478	22.032	25.7092	21.325	19.3418	ADAM metallopeptidase domain 10 [Source:HGNC Symbol;Acc:HGNC:188]	chr15:58881005-59042177	NM_001110	XM_005254117	.	.	NP_001101	XP_016877350	protein_coding	ENSG00000137845	102	188
ADAM11	.	.	.	.	.	.	0.450956	0.130724	0.506366	0.488006	0.213803	0.204205	0.146839	0.0836843	0.140834	0.111364	0.505116	0.470896	ADAM metallopeptidase domain 11 [Source:HGNC Symbol;Acc:HGNC:189]	chr17:42836398-42859214	NM_001318933, NM_002390	XM_011524817, XM_011524816, XM_011524815, XM_005257373	.	.	NP_001305862, NP_002381	XP_005257430, XP_011523119, XP_016880136	protein_coding	ENSG00000073670	4185	189
ADAM12	.	.	.	.	.	.	0.0276802	0.0975377	0.100345	0	0	0	0	0	0	0	0	0	ADAM metallopeptidase domain 12 [Source:HGNC Symbol;Acc:HGNC:190]	chr10:127700949-128077024	NM_001288973, NM_001288974, NM_001288975, NM_003474, NM_021641	XM_017016705	.	.	NP_001275902, NP_001275903, NP_001275904, NP_003465, NP_067673	XP_016872194	protein_coding	ENSG00000148848	8038	190
ADAM15	.	.	.	.	.	.	228.751	92.1208	141.622	22.5228	23.2295	22.0421	19.1598	18.5042	22.7204	22.6682	23.126	21.9196	ADAM metallopeptidase domain 15 [Source:HGNC Symbol;Acc:HGNC:193]	chr1:155023761-155035251	NM_001261464, NM_001261465, NM_001261466, NM_003815, NM_207191, NM_207194, NM_207195, NM_207196, NM_207197	.	.	.	NP_001248393, NP_001248394, NP_001248395, NP_003806, NP_997074, NP_997077, NP_997078, NP_997079, NP_997080	.	protein_coding	ENSG00000143537	8751	193
ADAM17	◎	.	.	◎	.	◎	9.04415	21.7157	15.5134	10.978	11.0352	10.6375	27.9782	28.9393	12.9055	13.0059	11.0356	10.9205	ADAM metallopeptidase domain 17 [Source:HGNC Symbol;Acc:HGNC:195]	chr2:9613946-9695921	NM_003183	XM_011510375	.	.	NP_003174	XP_011508677	protein_coding	ENSG00000151694	6868	195
ADAM18	.	.	.	.	.	.	0	0	0	0	0	0	0	0	0	0	0	0	ADAM metallopeptidase domain 18 [Source:HGNC Symbol;Acc:HGNC:196]	chr8:39442096-39587583	NM_001190956, NM_001320313, NM_014237	.	.	.	NP_001177885, NP_001307242, NP_055052	.	protein_coding	ENSG00000168619	8749	196
ADAM19	.	.	.	.	.	.	4.64034	4.35643	9.74623	0.00625656	0.0205123	0.0251101	0.0221186	0.0342592	0.0359973	0.0738667	0.0125131	0	ADAM metallopeptidase domain 19 [Source:HGNC Symbol;Acc:HGNC:197]	chr5:156904311-157002783	NM_033274	XM_005266003	.	.	NP_150377	XP_005266060	protein_coding	ENSG00000135074	8728	197
ADAM2	.	.	.	.	.	.	0	0	0	0	0	0	0	0	0	0	0	0	ADAM metallopeptidase domain 2 [Source:HGNC Symbol;Acc:HGNC:198]	chr8:39601253-39695808	NM_001278113, NM_001278114, NM_001464	XM_011544480, XM_011544479, XM_005273468	.	.	NP_001265042, NP_001265043, NP_001455	XP_005273525, XP_011542781, XP_011542782	protein_coding	ENSG00000104755	2515	198
ADAM20	.	.	.	.	.	.	0.0206613	0.011597	0	0	0.0257893	0	0	0	0	0	0	0	ADAM metallopeptidase domain 20 [Source:HGNC Symbol;Acc:HGNC:199]	chr14:70989074-71001732	NM_003814	XM_011537274, XM_011537273, XM_005268152, XM_005268151	.	.	NP_003805	XP_005268208, XP_005268209, XP_011535575, XP_011535576	protein_coding	ENSG00000134007	8748	199
ADAM21	.	.	.	.	.	.	0.0459415	0.0692122	0.0229724	0.0146462	0.0275801	0.0924333	0	0	0.0295235	0.0705036	0	0.0292925	ADAM metallopeptidase domain 21 [Source:HGNC Symbol;Acc:HGNC:200]	chr14:70918873-70926616	NM_003813	.	.	.	NP_003804	.	protein_coding	ENSG00000139985	8747	200
ADAM22	◎	.	.	◎	.	◎	0.106016	0.0154125	0.039822	1.68003	1.89964	2.12868	0.544271	0.714156	1.5717	1.31941	1.90825	1.4518	ADAM metallopeptidase domain 22 [Source:HGNC Symbol;Acc:HGNC:201]	chr7:87563457-87832204	NM_001324417, NM_004194, NM_016351, NM_021721, NM_021722, NM_021723	XM_017012339, XM_017012335, XM_011516324, XM_011516323, XM_011516322, XM_011516321, XM_011516320, XM_011516319, XM_011516318, XM_006716029, XM_006716028, XM_005250445	.	.	NP_001311346, NP_001311350, NP_004185, NP_057435, NP_068367, NP_068368, NP_068369	XP_005250502, XP_006716091, XP_006716092, XP_011514620, XP_011514621, XP_011514622, XP_011514623, XP_011514624, XP_011514625, XP_011514626, XP_016867821, XP_016867822, XP_016867824, XP_016867825, XP_016867826, XP_016867827, XP_016867828	protein_coding	ENSG00000008277	53616	201
ADAM23	.	.	.	.	.	.	1.55492	1.84692	1.48222	0	0	0.0289653	0.056094	0.0420233	0.0275011	0.0332017	0	0	ADAM metallopeptidase domain 23 [Source:HGNC Symbol;Acc:HGNC:202]	chr2:207308262-207485854	NM_003812	XM_011512086, XM_005246932	.	.	NP_003803	XP_005246989, XP_011510388	protein_coding	ENSG00000114948	8745	202
ADAM28	.	.	.	.	.	.	0.304491	0.290379	0.0909888	0	0	0	0	0.0110263	0.0115462	0	0	0	ADAM metallopeptidase domain 28 [Source:HGNC Symbol;Acc:HGNC:206]	chr8:24151552-24216531	NM_001304351, NM_014265, NM_021777	XM_017012976, XM_011544370, XM_011544368, XM_011544367, XM_011544366, XM_006716275, XM_006716274, XM_006716273, XM_005273380	.	.	NP_001291280, NP_055080, NP_068547	XP_005273437, XP_006716336, XP_006716337, XP_011542669, XP_011542670, XP_011542672, XP_016868464, XP_016868465	protein_coding	ENSG00000042980	10863	206
ADAM29	.	.	.	.	.	.	0	0	0	0	0	0	0	0	0	0	0	0	ADAM metallopeptidase domain 29 [Source:HGNC Symbol;Acc:HGNC:207]	chr4:175839508-175899331	NM_001130703, NM_001130704, NM_001130705, NM_001278125, NM_001278126, NM_001278127, NM_014269	XM_011531561, XM_011531560, XM_011531559, XM_011531558, XM_011531557, XM_011531556	.	.	NP_001124175, NP_001124176, NP_001124177, NP_001265054, NP_001265055, NP_001265056, NP_055084	XP_011529858, XP_011529859, XP_011529860, XP_011529861, XP_011529862, XP_011529863	protein_coding	ENSG00000168594	11086	207
ADAM30	.	.	.	.	.	.	0	0.011808	0	0	0	0	0	0	0	0	0	0	ADAM metallopeptidase domain 30 [Source:HGNC Symbol;Acc:HGNC:208]	chr1:120436155-120439118	NM_021794	.	.	.	NP_068566	.	protein_coding	ENSG00000134249	11085	208
ADAM32	.	.	.	.	.	.	0.0153132	0.198976	0.0744795	0.0197357	0	0	0.030983	0.0710242	0.079996	0.0476558	0	0.0394713	ADAM metallopeptidase domain 32 [Source:HGNC Symbol;Acc:HGNC:15479]	chr8:38965089-39142428	NM_001313994, NM_145004	XM_017013185, XM_011544434, XM_011544433, XM_006716299, XM_006716298	.	.	NP_001300923, NP_659441	XP_006716361, XP_006716362, XP_011542735, XP_011542736, XP_016868673, XP_016868674	protein_coding	ENSG00000197140	203102	15479
ADAM33	.	.	.	.	.	.	0	0	0.0103526	0	0	0	0	0	0	0	0	0	ADAM metallopeptidase domain 33 [Source:HGNC Symbol;Acc:HGNC:15478]	chr20:3648616-3662893	NM_001282447, NM_025220, NM_153202	XM_011529373, XM_011529368, XM_011529367, XM_011529366, XM_006723640, XM_006723639, XM_005260843	.	.	NP_001269376, NP_079496, NP_694882	XP_005260900, XP_006723702, XP_006723703, XP_011527668, XP_011527669, XP_011527670, XP_011527675	protein_coding	ENSG00000149451	80332	15478
ADAM7	.	.	.	.	.	.	0	0	0	0	0	0	0	0	0	0	0	0	ADAM metallopeptidase domain 7 [Source:HGNC Symbol;Acc:HGNC:214]	chr8:24298442-24384483	NM_003817	XM_005273673, XM_005273672, XM_005273671, XM_005273670, XM_005273669, XM_005273668	.	.	NP_003808	XP_005273727, XP_016869432	protein_coding	ENSG00000069206	8756	214
ADAM8	.	.	.	.	.	.	32.0097	63.7679	93.7955	0.181513	0.395816	0.17875	0.0772592	0.0768476	0.113842	0.0370248	0.154237	0.208789	ADAM metallopeptidase domain 8 [Source:HGNC Symbol;Acc:HGNC:215]	chr10:135075906-135090372	NM_001109, NM_001164489, NM_001164490	XM_011539118, XM_011539117, XM_011539116	.	.	NP_001100, NP_001157961, NP_001157962	XP_011537419	protein_coding	ENSG00000151651	101	215
ADAM9	.	.	.	.	.	.	35.9896	59.4858	58.708	30.4603	51.1846	50.436	69.1382	67.8893	63.8324	64.4051	30.5387	30.382	ADAM metallopeptidase domain 9 [Source:HGNC Symbol;Acc:HGNC:216]	chr8:38854387-38962520	NM_003816	XM_017013942, XM_011544682	.	.	NP_003807	XP_011542984, XP_016869431	protein_coding	ENSG00000168615	8754	216
ADAMDEC1	.	.	.	.	.	.	0	0.0160697	0	0	0	0	0	0	0	0	0	0	ADAM like decysin 1 [Source:HGNC Symbol;Acc:HGNC:16299]	chr8:24241797-24263526	NM_001145271, NM_001145272, NM_014479	.	.	.	NP_001138743, NP_001138744, NP_055294	.	protein_coding	ENSG00000134028	27299	16299
ADAMTS1	.	.	.	.	.	.	1.88454	8.39628	7.10978	0.0164561	0	0.0167161	0.0163984	0.0303954	0.0318143	0	0.0329123	0	ADAM metallopeptidase with thrombospondin type 1 motif 1 [Source:HGNC Symbol;Acc:HGNC:217]	chr21:28208065-28217728	NM_006988	.	.	.	NP_008919	.	protein_coding	ENSG00000154734	9510	217
ADAMTS10	.	.	.	.	.	.	0.0389146	0.028775	0.0550862	0.137517	0.179507	0.101535	0.0954781	0.0424319	0.108168	0.0622554	0.141387	0.133646	ADAM metallopeptidase with thrombospondin type 1 motif 10 [Source:HGNC Symbol;Acc:HGNC:13201]	chr19:8645125-8675585	NM_001282352, NM_030957	XM_017027338, XM_011528336, XM_011528335, XM_011528334, XM_011528333, XM_011528332, XM_011528331, XM_006722917	.	.	NP_001269281, NP_112219	XP_006722980, XP_016882827	protein_coding	ENSG00000142303	81794	13201
ADAMTS12	.	.	.	.	.	.	1.99797	4.09208	3.94053	0	0	0.00810632	0.0140734	0	0	0	0	0	ADAM metallopeptidase with thrombospondin type 1 motif 12 [Source:HGNC Symbol;Acc:HGNC:14605]	chr5:33523639-33892297	NM_030955	XM_011514145	.	.	NP_001311440, NP_001311441, NP_112217	.	protein_coding	ENSG00000151388	81792	14605
ADAMTS13	.	.	.	.	.	.	0.885951	0.233359	0.363276	1.28067	0.606219	1.11754	0.161988	0.0757416	0.55327	0.524399	1.49632	1.06502	ADAM metallopeptidase with thrombospondin type 1 motif 13 [Source:HGNC Symbol;Acc:HGNC:1366]	chr9:136287119-136324524	NM_139025, NM_139026, NM_139027	XM_011518175, XM_011518174	NR_024514	.	NP_620594, NP_620595, NP_620596	XP_016869721, XP_016869722	protein_coding	ENSG00000160323	11093	1366
ADAMTS14	.	.	.	.	.	.	0.50661	0.404926	0.63259	0	0.0281288	0	0.0149022	0	0.0286001	0	0	0	ADAM metallopeptidase with thrombospondin type 1 motif 14 [Source:HGNC Symbol;Acc:HGNC:14899]	chr10:72432558-72522197	NM_080722, NM_139155	XM_011539300	.	.	NP_542453, NP_631894	XP_011537602	protein_coding	ENSG00000138316	140766	14899
ADAMTS15	.	.	.	.	.	.	0.33643	0.19065	0.18909	0	0	0	0	0	0	0	0	0	ADAM metallopeptidase with thrombospondin type 1 motif 15 [Source:HGNC Symbol;Acc:HGNC:16305]	chr11:130318868-130346536	NM_139055	XM_005271419	.	.	NP_620686	XP_005271476	protein_coding	ENSG00000166106	170689	16305
ADAMTS16	.	.	.	.	.	.	0.0101037	0.0625292	0.051517	0.0506865	0.0578607	0.0317405	0.0314916	0.0524828	0.0152012	0.0372476	0.0475367	0.0538364	ADAM metallopeptidase with thrombospondin type 1 motif 16 [Source:HGNC Symbol;Acc:HGNC:17108]	chr5:5140442-5320417	NM_139056	.	.	.	NP_620687	.	protein_coding	ENSG00000145536	170690	17108
ADAMTS17	.	.	.	.	.	.	0.0379989	0.087495	0.0468627	0.0138202	0	0	0.0140432	0.0128716	0	0.0168147	0.0139792	0.0136612	ADAM metallopeptidase with thrombospondin type 1 motif 17 [Source:HGNC Symbol;Acc:HGNC:17109]	chr15:100511793-100882210	NM_139057	XM_011521312, XM_005254872	.	.	NP_620688	XP_005254929, XP_011519614	protein_coding	ENSG00000140470	170691	17109
ADAMTS18	.	.	.	.	.	.	0	0.060403	0.00530926	0.00695436	0	0	0	0	0	0.0162006	0.0139087	0	ADAM metallopeptidase with thrombospondin type 1 motif 18 [Source:HGNC Symbol;Acc:HGNC:17110]	chr16:77316024-77469011	NM_001326358, NM_199355	XM_011522924, XM_011522923	.	.	NP_001313287, NP_955387	XP_011521225, XP_011521226	protein_coding	ENSG00000140873	170692	17110
ADAMTS19	.	.	.	.	.	.	0	0	0	0	0	0	0	0	0	0	0	0	ADAM metallopeptidase with thrombospondin type 1 motif 19 [Source:HGNC Symbol;Acc:HGNC:17111]	chr5:128795957-129074376	NM_133638	XM_011543248, XM_011543247, XM_011543246	.	.	NP_598377	XP_011541548, XP_011541549, XP_011541550	protein_coding	ENSG00000145808	171019	17111
ADAMTS2	.	.	.	.	.	.	0.094294	0	0.0537454	0.548263	0.825719	0.494309	0.398081	0.36256	1.01833	0.389934	0.437184	0.659341	ADAM metallopeptidase with thrombospondin type 1 motif 2 [Source:HGNC Symbol;Acc:HGNC:218]	chr5:178537851-178772431	NM_014244, NM_021599	XM_017010063	.	.	NP_055059, NP_067610	XP_016865552	protein_coding	ENSG00000087116	9509	218
ADAMTS20	.	.	.	.	.	.	0	0.00487304	0	0	0	0	0	0	0	0	0	0	ADAM metallopeptidase with thrombospondin type 1 motif 20 [Source:HGNC Symbol;Acc:HGNC:17178]	chr12:43747668-43945724	NM_025003	XM_011538754	.	.	NP_079279	XP_011537056	protein_coding	ENSG00000173157	80070	17178
ADAMTS3	.	.	.	.	.	.	0.0644349	0.0625904	0.0708896	0	0	0	0	0.0303087	0	0	0	0	ADAM metallopeptidase with thrombospondin type 1 motif 3 [Source:HGNC Symbol;Acc:HGNC:219]	chr4:73146685-73435103	NM_014243	XM_011532422, XM_011532421	.	.	NP_055058	XP_011530723, XP_011530724	protein_coding	ENSG00000156140	9508	219
ADAMTS4	.	.	.	.	.	.	0.00657121	0.0397004	0.00629997	0.156785	0.37284	0.178668	0.485368	0.555218	0.349089	0.427513	0.140455	0.173116	ADAM metallopeptidase with thrombospondin type 1 motif 4 [Source:HGNC Symbol;Acc:HGNC:220]	chr1:161154097-161168846	NM_005099	XM_006711635	.	.	NP_005090	.	protein_coding	ENSG00000158859	9507	220
ADAMTS5	.	.	.	.	.	.	0.0044209	0	0.0122069	0	0	0	0	0	0	0	0	0	ADAM metallopeptidase with thrombospondin type 1 motif 5 [Source:HGNC Symbol;Acc:HGNC:221]	chr21:28290230-28338832	NM_007038	XM_011529448	.	.	NP_008969	XP_011527750	protein_coding	ENSG00000154736	11096	221
ADAMTS6	.	.	.	.	.	.	0.415719	0.289997	0.426781	0.594033	0.453351	0.452888	0.141355	0.0914692	0.447162	0.492934	0.473915	0.714151	ADAM metallopeptidase with thrombospondin type 1 motif 6 [Source:HGNC Symbol;Acc:HGNC:222]	chr5:64444562-64777747	NM_197941	XM_011543121, XM_011543117, XM_011543116, XM_011543115, XM_011543114, XM_011543113	.	.	NP_922932	XP_011541415, XP_011541416, XP_011541417, XP_011541418, XP_011541419, XP_011541423	protein_coding	ENSG00000049192	11174	222
ADAMTS7	.	.	.	.	.	.	0.865671	0.243334	0.446855	0.0173404	0.0165404	0.0177331	0.0175196	0	0.0497399	0.0643443	0.0346808	0	ADAM metallopeptidase with thrombospondin type 1 motif 7 [Source:HGNC Symbol;Acc:HGNC:223]	chr15:79051544-79190475	NM_014272	XM_005254137	.	.	NP_055087	XP_005254194	protein_coding	ENSG00000136378	11173	223
ADAMTS8	.	.	.	.	.	.	0	0	0.00857018	0	0	0	0	0	0	0	0	0	ADAM metallopeptidase with thrombospondin type 1 motif 8 [Source:HGNC Symbol;Acc:HGNC:224]	chr11:130274819-130298888	NM_007037	.	.	.	NP_008968	XP_016872634	protein_coding	ENSG00000134917	11095	224
ADAMTS9	.	.	.	.	.	.	0	0	0	0.0197473	0	0	0	0.0188334	0.029695	0	0.0296573	0.00983719	ADAM metallopeptidase with thrombospondin type 1 motif 9 [Source:HGNC Symbol;Acc:HGNC:13202]	chr3:64501329-64673676	NM_001318781, NM_182920	XM_005265329	.	.	NP_001305710, NP_891550	XP_005265386	protein_coding	ENSG00000163638	56999	13202
ADAMTSL1	.	.	.	.	.	.	0	0.0035498	0	0	0	0.0101329	0	0	0	0	0	0	ADAMTS like 1 [Source:HGNC Symbol;Acc:HGNC:14632]	chr9:18473891-18910948	NM_001040272, NM_052866	XM_017015313, XM_011518066, XM_011518065, XM_011518064, XM_011518063	.	.	NP_001035362, NP_443098	XP_011516365, XP_011516366, XP_016870799, XP_016870802	protein_coding	ENSG00000178031	92949	14632
ADAMTSL2	.	.	.	.	.	.	0.0644917	0.0236719	0.07179	1.9642	1.72189	1.82748	1.14481	1.14934	1.31535	1.40318	1.85603	2.07237	ADAMTS like 2 [Source:HGNC Symbol;Acc:HGNC:14631]	chr9:136397285-136440641	NM_001145320, NM_014694	XM_011519242, XM_011519241, XM_006717337, XM_005272239, XM_005272238, XM_005272237	.	.	NP_001138792, NP_055509	XP_005272294, XP_005272295, XP_005272296, XP_006717400, XP_011517543, XP_011517544	protein_coding	ENSG00000197859	9719	14631
ADAMTSL3	.	.	.	.	.	.	0.0494473	0.0291708	0.100714	0.020224	0.00940216	0.041704	0.0102708	0	0.0100043	0.0241142	0.0104242	0.0300239	ADAMTS like 3 [Source:HGNC Symbol;Acc:HGNC:14633]	chr15:84322837-84708594	NM_001301110, NM_207517	XM_011521824, XM_011521823, XM_011521822, XM_011521821	.	.	NP_001288039, NP_997400	XP_011520124, XP_011520125, XP_011520126	protein_coding	ENSG00000156218	57188	14633
ADAMTSL4	.	.	.	.	.	.	24.2031	2.88309	19.151	8.048	4.21809	5.00468	3.26519	3.8281	3.66887	3.9178	8.29259	7.80342	ADAMTS like 4 [Source:HGNC Symbol;Acc:HGNC:19706]	chr1:150521844-150533413	NM_001288607, NM_001288608, NM_019032, NM_025008	XM_011509648, XM_011509647, XM_011509646, XM_011509645, XM_011509644	.	.	NP_001275536, NP_001275537, NP_061905, NP_079284	XP_011507946, XP_011507947, XP_011507948, XP_011507949, XP_011507950, XP_016856995	protein_coding	ENSG00000143382	54507	19706
ADAMTSL5	.	.	.	.	.	.	0.786253	1.65303	1.54961	1.53322	1.72582	1.57535	1.8993	1.67655	1.78124	1.32709	1.37966	1.68678	ADAMTS like 5 [Source:HGNC Symbol;Acc:HGNC:27912]	chr19:1505016-1513188	NM_213604	XM_017026745, XM_017026744, XM_011527961, XM_005259549	.	.	NP_998769	XP_005259606, XP_011526263, XP_016882233, XP_016882234	protein_coding	ENSG00000185761	339366	27912
ADAP1	.	.	.	.	.	.	28.3656	11.9651	14.1256	17.8613	14.7006	13.122	13.6467	13.3484	13.5186	13.862	17.329	18.3936	ArfGAP with dual PH domains 1 [Source:HGNC Symbol;Acc:HGNC:16486]	chr7:937537-995043	NM_001284308, NM_001284309, NM_001284310, NM_001284311, NM_006869	.	.	.	NP_001271237, NP_001271238, NP_001271239, NP_001271240, NP_006860	.	protein_coding	ENSG00000105963	11033	16486
ADAP2	.	.	.	.	.	.	0.181216	0.270981	0.240652	0.449519	0.341331	0.296642	0.475121	0.394546	0.408346	0.217845	0.45082	0.448217	ArfGAP with dual PH domains 2 [Source:HGNC Symbol;Acc:HGNC:16487]	chr17:29248697-29286340	NM_018404	XM_011524994, XM_011524993, XM_006721973, XM_005258011, XM_005258008	.	.	NP_060874	XP_005258065	protein_coding	ENSG00000184060	55803	16487
ADAR	.	.	.	.	.	.	61.4981	47.0917	51.7299	40.1063	34.0865	34.7661	39.5332	39.7157	36.0937	34.549	40.3426	39.87	adenosine deaminase, RNA specific [Source:HGNC Symbol;Acc:HGNC:225]	chr1:154554537-154600440	NM_001025107, NM_001111, NM_001193495, NM_015840, NM_015841	XM_011509062, XM_011509061, XM_011509060, XM_006711113, XM_006711112, XM_006711111, XM_006711109	.	.	NP_001020278, NP_001102, NP_001180424, NP_056655, NP_056656	XP_006711172, XP_006711174, XP_006711175, XP_006711176, XP_011507362, XP_011507363, XP_011507364	protein_coding	ENSG00000160710	103	225
ADARB1	.	.	.	.	.	.	7.59356	4.96292	4.01164	5.25902	4.02598	4.27209	3.94144	4.49374	4.25948	5.24517	5.24341	5.27463	adenosine deaminase, RNA specific B1 [Source:HGNC Symbol;Acc:HGNC:226]	chr21:46494514-46646475	NM_001112, NM_001160230, NM_015833, NM_015834	XM_017028251, XM_017028248, XM_011529432, XM_011529428, XM_011529427, XM_011529426, XM_011529425, XM_011529424, XM_006723956, XM_006723954	NR_027673, NR_027674	.	NP_001103, NP_001153702, NP_056648, NP_056649	XP_006724017, XP_006724019, XP_011527726, XP_011527727, XP_011527728, XP_011527729, XP_011527734, XP_016883731, XP_016883732, XP_016883733, XP_016883734, XP_016883735, XP_016883736, XP_016883737, XP_016883738, XP_016883739, XP_016883740, XP_016883741, XP_016883742, XP_016883743, XP_016883744, XP_016883745	protein_coding	ENSG00000197381	104	226
ADARB2	.	.	.	.	.	.	0.0335401	0.0234708	0.146575	0	0	0	0	0	0	0	0	0	adenosine deaminase, RNA specific B2 (inactive) [Source:HGNC Symbol;Acc:HGNC:227]	chr10:1223257-1779670	NM_018702	.	.	.	NP_061172	.	protein_coding	ENSG00000185736	105	227
ADAT1	.	.	.	.	.	.	6.85721	6.22025	4.56121	2.63265	2.34843	2.6736	3.67547	4.11335	2.88702	4.20048	2.74252	2.52278	adenosine deaminase, tRNA specific 1 [Source:HGNC Symbol;Acc:HGNC:228]	chr16:75633899-75657198	NM_012091	.	.	.	NP_001311374, NP_036223	.	protein_coding	ENSG00000065457	23536	228
ADAT2	.	.	.	.	.	.	5.6369	2.05276	3.95433	9.06708	8.83019	9.13632	9.53552	10.3388	9.4761	8.43911	9.43475	8.69941	adenosine deaminase, tRNA specific 2 [Source:HGNC Symbol;Acc:HGNC:21172]	chr6:143743968-143771810	NM_001286259, NM_182503	XM_017010263, XM_017010262, XM_011535444, XM_011535442, XM_011535441, XM_011535440, XM_011535439	.	.	NP_001273188, NP_872309	XP_011533741, XP_011533742, XP_011533743, XP_011533744, XP_011533746, XP_016865749, XP_016865750, XP_016865751, XP_016865752	protein_coding	ENSG00000189007	134637	21172
ADAT3	.	.	.	.	.	.	4.33846	5.98265	7.38846	8.65217	8.02637	7.2825	13.1548	9.15425	7.26738	6.35111	9.13652	8.16781	adenosine deaminase, tRNA specific 3 [Source:HGNC Symbol;Acc:HGNC:25151]	chr19:1905212-1926016	NM_138422	.	.	.	NP_001316462, NP_612431	.	protein_coding	ENSG00000213638	113179	25151
ADCK1	.	.	.	.	.	.	7.01172	3.7404	4.28293	2.09335	1.20165	1.96633	2.6714	2.40393	2.01258	2.28469	1.8759	2.3108	aarF domain containing kinase 1 [Source:HGNC Symbol;Acc:HGNC:19038]	chr14:78266425-78400297	NM_001142545, NM_020421	XM_005267886, XM_005267885	.	.	NP_001136017, NP_065154	XP_005267942, XP_005267943, XP_011535289, XP_011535290	protein_coding	ENSG00000063761	57143	19038
ADCK2	.	.	.	.	.	.	19.8027	24.2254	15.113	12.6338	10.5869	10.7359	7.3216	8.27094	10.9212	10.1929	12.6698	12.5978	aarF domain containing kinase 2 [Source:HGNC Symbol;Acc:HGNC:19039]	chr7:140372952-140422590	NM_052853	XM_011516675, XM_006716170	.	.	NP_443085	XP_006716233, XP_011514977	protein_coding	ENSG00000133597	90956	19039
ADCK3	.	.	.	.	.	.	17.6236	3.65921	10.026	60.0542	47.2487	48.2012	31.4753	29.7513	40.0575	44.1008	59.7979	60.3106	coenzyme Q8A [Source:HGNC Symbol;Acc:HGNC:16812]	chr1:227085236-227175246	NM_020247	XM_011544241, XM_011544240, XM_011544239, XM_011544238, XM_005273201	.	.	NP_064632	XP_005273258, XP_011542540, XP_011542541, XP_011542542, XP_011542543, XP_016857341	protein_coding	ENSG00000163050	56997	16812
ADCK4	.	.	.	.	.	.	20.1713	12.8773	11.9763	8.54027	7.78077	7.72291	7.79088	7.66884	7.15323	8.18137	8.60149	8.47905	coenzyme Q8B [Source:HGNC Symbol;Acc:HGNC:19041]	chr19:41197433-41222790	NM_001142555, NM_024876	XM_011527338, XM_011527337, XM_011527336, XM_011527335, XM_011527334, XM_006723393, XM_006723392, XM_005259273, XM_005259272, XM_005259271, XM_005259270	.	.	NP_001136027, NP_079152	XP_005259328, XP_005259329, XP_005259330, XP_006723455, XP_006723456, XP_011525636, XP_011525639, XP_011525640	protein_coding	ENSG00000123815	79934	19041
ADCK5	.	.	.	.	.	.	11.6274	3.28174	6.56898	10.3805	7.27046	8.26724	4.09858	4.86149	7.19202	5.52046	10.2506	10.5105	aarF domain containing kinase 5 [Source:HGNC Symbol;Acc:HGNC:21738]	chr8:145597740-145634733	NM_174922	XM_017013174, XM_011516910, XM_011516909, XM_011516908, XM_011516907, XM_006716527	.	.	NP_777582	XP_006716590, XP_011515209, XP_011515211, XP_011515212, XP_016868663	protein_coding	ENSG00000173137	203054	21738
ADCY1	.	.	.	.	.	.	1.00563	1.04125	1.63095	0.157683	0.557897	0.309258	0.267824	0.236773	0.576993	0.520914	0.146936	0.168431	adenylate cyclase 1 [Source:HGNC Symbol;Acc:HGNC:232]	chr7:45613738-45762715	NM_001281768, NM_021116	XM_005249585, XM_005249584	.	.	NP_001268697, NP_066939	XP_005249641, XP_005249642	protein_coding	ENSG00000164742	107	232
ADCY10	.	.	.	.	.	.	0.00550038	0	0	0.0910714	0	0	0	0.0271761	0	0	0	0.182143	adenylate cyclase 10, soluble [Source:HGNC Symbol;Acc:HGNC:21285]	chr1:167778624-167883453	NM_001167749, NM_001297772, NM_018417	XM_011509765, XM_011509764, XM_011509763, XM_011509762, XM_011509761, XM_011509760, XM_006711449	.	.	NP_001161221, NP_001284701, NP_060887	XP_006711512, XP_011508062, XP_011508064, XP_011508065, XP_011508067	protein_coding	ENSG00000143199	55811	21285
ADCY2	.	.	.	.	.	.	0	0	0.00480888	0	0	0	0	0	0	0	0	0	adenylate cyclase 2 [Source:HGNC Symbol;Acc:HGNC:233]	chr5:7396320-7830194	NM_020546	XM_011513942	.	.	NP_065433	XP_011512244	protein_coding	ENSG00000078295	108	233
ADCY3	.	.	.	.	.	.	23.3981	10.023	22.275	0.081789	0.0508999	0	0.0364667	0.0733266	0.0613088	0.0436479	0.12796	0.0356182	adenylate cyclase 3 [Source:HGNC Symbol;Acc:HGNC:234]	chr2:25012602-25142708	NM_001320613, NM_004036	XM_011532496, XM_011532495, XM_011532494, XM_011532493, XM_011532492, XM_011532491, XM_011532490, XM_011532489, XM_006711925, XM_005264105, XM_005264104	.	.	NP_001307542, NP_004027	XP_005264161, XP_005264162, XP_006711988, XP_011530791, XP_011530792, XP_011530793, XP_011530794, XP_011530795, XP_011530796, XP_011530798, XP_016858675, XP_016858676, XP_016858677	protein_coding	ENSG00000138031	109	234
ADCY4	.	.	.	.	.	.	0.0403571	0.0955784	0.0578108	0.0132594	0	0.0265212	0	0	0	0.031743	0.0265187	0	adenylate cyclase 4 [Source:HGNC Symbol;Acc:HGNC:235]	chr14:24787554-24809251	NM_001198568, NM_001198592, NM_139247	.	.	.	NP_001185497, NP_001185521, NP_640340	.	protein_coding	ENSG00000129467	196883	235
ADCY5	.	.	.	.	.	.	0.0050673	0.00889052	0	0.00940951	0	0.019597	0	0.0248297	0	0	0	0.018819	adenylate cyclase 5 [Source:HGNC Symbol;Acc:HGNC:236]	chr3:123001142-123168605	NM_001199642, NM_183357	XM_011512361, XM_011512360, XM_011512359, XM_006713484, XM_006713483, XM_005247078, XM_005247077	.	.	NP_001186571, NP_899200	XP_005247134, XP_005247135, XP_006713546, XP_006713547, XP_011510661, XP_011510662, XP_011510663, XP_016861127, XP_016861128, XP_016861129	protein_coding	ENSG00000173175	111	236
ADCY6	.	.	.	.	.	.	9.33521	7.30677	7.75093	11.556	10.6244	10.9441	9.51419	9.74396	11.2561	10.5825	11.1541	11.9578	adenylate cyclase 6 [Source:HGNC Symbol;Acc:HGNC:237]	chr12:49159980-49182820	NM_015270, NM_020983	XM_011537811, XM_011537810, XM_006719210, XM_005268605	.	.	NP_056085, NP_066193	XP_005268662, XP_006719273	protein_coding	ENSG00000174233	112	237
ADCY7	.	.	.	.	.	.	19.496	11.8201	14.5346	3.34896	2.18727	2.14648	4.42169	4.59886	2.46176	2.28119	3.33371	3.36421	adenylate cyclase 7 [Source:HGNC Symbol;Acc:HGNC:238]	chr16:50300426-50402845	NM_001114, NM_001286057	XM_017022898, XM_017022895, XM_011522844, XM_011522843, XM_011522842, XM_011522841, XM_011522840, XM_011522839, XM_011522838, XM_011522837, XM_011522836, XM_011522835, XM_005255786, XM_005255779	.	.	NP_001105, NP_001272986	XP_005255836, XP_005255843, XP_011521137, XP_011521138, XP_011521139, XP_011521140, XP_011521141, XP_011521142, XP_011521144, XP_016878384, XP_016878387	protein_coding	ENSG00000121281	113	238
ADCY8	.	.	.	.	.	.	0	0	0	0	0	0	0	0	0	0	0	0	adenylate cyclase 8 [Source:HGNC Symbol;Acc:HGNC:239]	chr8:131792546-132054672	NM_001115	XM_006716501, XM_005250769	.	.	NP_001106	XP_005250826, XP_006716564	protein_coding	ENSG00000155897	114	239
ADCY9	.	.	.	.	.	.	6.97504	5.23251	5.89635	9.70254	8.45326	8.34312	8.91133	9.13577	9.49698	9.53564	9.83113	9.57396	adenylate cyclase 9 [Source:HGNC Symbol;Acc:HGNC:240]	chr16:4012651-4166186	NM_001116	XM_005255079	.	.	NP_001107	XP_005255136	protein_coding	ENSG00000162104	115	240
ADCYAP1	.	.	.	.	.	.	0	0	0	0	0	0	0	0	0	0	0	0	adenylate cyclase activating polypeptide 1 [Source:HGNC Symbol;Acc:HGNC:241]	chr18:904943-912173	NM_001099733, NM_001117	.	.	.	NP_001093203, NP_001108	.	protein_coding	ENSG00000141433	116	241
ADCYAP1R1	.	.	.	.	.	.	0	0	0	0	0	0	0	0	0	0	0	0	ADCYAP receptor type I [Source:HGNC Symbol;Acc:HGNC:242]	chr7:31092075-31151093	NM_001118, NM_001199635, NM_001199636, NM_001199637	XM_011515120, XM_011515119, XM_011515118, XM_011515117, XM_006715645, XM_005249618	.	.	NP_001109, NP_001186564, NP_001186565, NP_001186566	XP_005249675, XP_006715708, XP_016867225, XP_016867226	protein_coding	ENSG00000078549	117	242
ADD1	.	.	.	.	.	.	29.0302	24.2174	25.4058	42.6039	30.5948	29.2073	20.8649	20.9675	27.2169	28.7909	43.0709	42.1369	adducin 1 [Source:HGNC Symbol;Acc:HGNC:243]	chr4:2845583-2931803	NM_001119, NM_001286645, NM_014189, NM_014190, NM_176801	XM_017007710, XM_017007704, XM_005247937, XM_005247936, XM_005247935, XM_005247934, XM_005247933	.	.	NP_001110, NP_001273574, NP_054908, NP_054909, NP_789771	XP_005247990, XP_005247991, XP_005247992, XP_005247993, XP_005247994, XP_016863193, XP_016863195, XP_016863196, XP_016863197, XP_016863198, XP_016863199	protein_coding	ENSG00000087274	118	243
ADD2	.	.	.	.	.	.	6.09998	3.14473	5.73763	0.0538546	0.0364518	0.0322136	0	0.0290536	0.0378576	0.0809193	0.0320254	0.0756838	adducin 2 [Source:HGNC Symbol;Acc:HGNC:244]	chr2:70883915-70995344	NM_001185054, NM_001185055, NM_001617, NM_017482, NM_017488	XM_011532503, XM_011532502	.	.	NP_001171983, NP_001171984, NP_001608, NP_059516, NP_059522	XP_011530804, XP_011530805	protein_coding	ENSG00000075340	119	244
ADD3	.	.	.	.	.	.	16.6746	13.6269	11.5036	21.942	19.5847	19.0632	10.3897	9.95715	16.4929	18.1986	22.046	21.8379	adducin 3 [Source:HGNC Symbol;Acc:HGNC:245]	chr10:111765561-111895323	NM_001121, NM_016824, NM_019903	XM_011539289, XM_011539288, XM_011539287, XM_006717629, XM_006717628, XM_006717627, XM_006717626, XM_005269535, XM_005269534, XM_005269533, XM_005269531, XM_005269530, XM_005269529	.	.	NP_001112, NP_001307520, NP_001307521, NP_001307522, NP_058432, NP_063968	XP_005269586, XP_005269587, XP_005269588, XP_005269590, XP_005269591, XP_006717689, XP_006717690, XP_006717691, XP_011537589, XP_011537590	protein_coding	ENSG00000148700	120	245
ADGB	.	.	.	.	.	.	0	0	0	0	0	0	0	0	0	0	0	0	androglobin [Source:HGNC Symbol;Acc:HGNC:21212]	chr6:146920100-147136598	NM_024694	XM_017011314, XM_011536134, XM_011536130, XM_011536129, XM_011536128, XM_011536127, XM_011536126, XM_011536125, XM_006715566	.	.	NP_078970	XP_006715629, XP_011534427, XP_011534428, XP_011534429, XP_011534430, XP_011534432, XP_011534436, XP_016866803, XP_016866804	protein_coding	ENSG00000118492	79747	21212
ADGRA1	.	.	.	.	.	.	0	0	0	0.0112188	0.0213317	0	0.0227996	0	0	0	0	0.0224377	adhesion G protein-coupled receptor A1 [Source:HGNC Symbol;Acc:HGNC:13838]	chr10:134884432-134945179	NM_001083909, NM_001291085	XM_005252695	.	.	NP_001077378, NP_001278014	XP_005252752	protein_coding	ENSG00000197177	84435	13838
ADGRA2	.	.	.	.	.	.	0.22303	0.0176285	0.0687018	0.0952569	0.126656	0.18584	0.0602644	0.0306736	0.128063	0.12247	0.0753117	0.115202	adhesion G protein-coupled receptor A2 [Source:HGNC Symbol;Acc:HGNC:17849]	chr8:37654423-37707422	NM_032777	XM_011544483, XM_011544482, XM_011544481	.	.	NP_116166	XP_011542783, XP_011542784, XP_011542785	protein_coding	ENSG00000020181	25960	17849
ADGRA3	.	.	.	.	.	.	9.21806	6.95211	13.0134	26.3804	30.0605	30.0615	22.5592	21.6033	32.4129	31.1518	26.1495	26.6112	adhesion G protein-coupled receptor A3 [Source:HGNC Symbol;Acc:HGNC:13839]	chr4:22388997-22517677	NM_145290	XM_011513810	.	.	NP_660333	.	protein_coding	ENSG00000152990	166647	13839
ADGRB1	.	.	.	.	.	.	0.0211879	0.0223237	0.0268991	0.0464226	0	0.0385071	0.132739	0.222032	0.0357541	0	0.0186146	0.0742306	adhesion G protein-coupled receptor B1 [Source:HGNC Symbol;Acc:HGNC:943]	chr8:143530790-143626370	NM_001702	XM_011517201, XM_011517200, XM_011517199	.	.	NP_001693	XP_011515501	protein_coding	ENSG00000181790	575	943
ADGRB2	.	.	.	.	.	.	5.5193	1.71748	3.8305	0.0107375	0.0405046	0.0604484	0	0.0196489	0	0.0262941	0.021475	0	adhesion G protein-coupled receptor B2 [Source:HGNC Symbol;Acc:HGNC:944]	chr1:32192717-32229941	NM_001294335, NM_001294336	XM_017001910, XM_017001909, XM_017001905, XM_017001904, XM_017001900, XM_017001899, XM_011541858, XM_011541857, XM_011541856, XM_011541855, XM_011541854, XM_011541853, XM_011541852, XM_011541851, XM_011541850, XM_011541849, XM_011541848	.	.	NP_001281264, NP_001281265	XP_011540150, XP_011540151, XP_011540160, XP_016857388, XP_016857389, XP_016857390, XP_016857391, XP_016857392, XP_016857393, XP_016857394, XP_016857395, XP_016857397, XP_016857398, XP_016857399, XP_016857400	protein_coding	ENSG00000121753	576	944
ADGRB3	.	.	.	.	.	.	0	0.00615718	0	0	0.0151494	0	0	0	0	0	0	0	adhesion G protein-coupled receptor B3 [Source:HGNC Symbol;Acc:HGNC:945]	chr6:69345258-70099403	NM_001704	XM_011536010, XM_011536009, XM_011536008, XM_006715534, XM_005248752	.	.	NP_001695	XP_005248809, XP_006715597, XP_011534310, XP_011534311, XP_011534312	protein_coding	ENSG00000135298	577	945
ADGRD1	.	.	.	.	.	.	0	0.120134	0.0119876	1.77949	1.79037	0.892446	0.928073	1.05933	0.97804	1.93818	2.13418	1.42481	adhesion G protein-coupled receptor D1 [Source:HGNC Symbol;Acc:HGNC:19893]	chr12:131438451-131626014	NM_198827	XM_011538208, XM_011538206, XM_011538205, XM_011538204, XM_011538203, XM_005253566	.	.	NP_942122	XP_005253623, XP_011536505, XP_011536506, XP_011536507, XP_011536508, XP_011536510	protein_coding	ENSG00000111452	283383	19893
ADGRD2	.	.	.	.	.	.	1.56819	0.0574897	0.504291	0	0	0	0	0	0	0	0	0	adhesion G protein-coupled receptor D2 [Source:HGNC Symbol;Acc:HGNC:18651]	chr9:127214369-127240868	.	.	.	.	.	.	protein_coding	ENSG00000180264	.	18651
ADGRE1	.	.	.	.	.	.	0	0.00928458	0	0	0	0	0	0	0	0	0	0	adhesion G protein-coupled receptor E1 [Source:HGNC Symbol;Acc:HGNC:3336]	chr19:6887576-6940470	NM_001256252, NM_001256253, NM_001256254, NM_001256255, NM_001974	XM_011527794, XM_011527793	.	.	NP_001243181, NP_001243182, NP_001243183, NP_001243184, NP_001965	XP_011526096	protein_coding	ENSG00000174837	2015	3336
ADGRE2	.	.	.	.	.	.	2.57843	2.31155	3.99111	0	0	0	0.024021	0	0	0	0	0	adhesion G protein-coupled receptor E2 [Source:HGNC Symbol;Acc:HGNC:3337]	chr19:14800880-14889349	NM_001271052, NM_013447	XM_011527953, XM_011527952, XM_011527951, XM_011527950, XM_011527949, XM_011527948	.	.	NP_001257981, NP_038475	XP_011526250, XP_011526251, XP_011526253, XP_011526254, XP_011526255, XP_016882215	protein_coding	ENSG00000127507	30817	3337
ADGRE3	.	.	.	.	.	.	0	0	0	0	0	0	0	0	0	0	0	0	adhesion G protein-coupled receptor E3 [Source:HGNC Symbol;Acc:HGNC:23647]	chr19:14729928-14800839	NM_001289158, NM_001289159, NM_032571	XM_011528374, XM_005260118	.	.	NP_001276087, NP_001276088, NP_115960	XP_011526676, XP_016882872	protein_coding	ENSG00000131355	84658	23647
ADGRE5	◎	.	.	.	.	◎	28.5877	16.7536	42.7187	2.04175	1.37475	1.2395	2.64305	2.76147	1.81657	1.92374	1.81027	2.27323	adhesion G protein-coupled receptor E5 [Source:HGNC Symbol;Acc:HGNC:1711]	chr19:14491967-14519537	NM_001025160, NM_001784, NM_078481	XM_017027547, XM_011528451	.	.	NP_001020331, NP_001775, NP_510966	XP_011526753, XP_016883036	protein_coding	ENSG00000123146	976	1711
ADGRF1	.	.	.	.	.	.	2.3886	1.54942	4.02533	0	0	0	0	0	0	0	0	0	adhesion G protein-coupled receptor F1 [Source:HGNC Symbol;Acc:HGNC:18990]	chr6:46965439-47010099	NM_025048, NM_153840	XM_017010736, XM_005249005	.	.	NP_079324, NP_722582	XP_005249062, XP_016866225	protein_coding	ENSG00000153292	266977	18990
ADGRF2	.	.	.	.	.	.	0.102382	0.0139009	0.0353646	0	0	0	0	0	0	0	0	0	adhesion G protein-coupled receptor F2 [Source:HGNC Symbol;Acc:HGNC:18991]	chr6:47624171-47689757	NM_153839	.	.	.	NP_722581	.	protein_coding	ENSG00000164393	222611	18991
ADGRF3	.	.	.	.	.	.	0.0399878	0.0377402	0.0184866	1.13425	0.67404	0.646662	0.138626	0.0811992	0.653794	0.422	0.995461	1.27304	adhesion G protein-coupled receptor F3 [Source:HGNC Symbol;Acc:HGNC:18989]	chr2:26531262-26618759	NM_001145168, NM_001145169, NM_153835	XM_011532622	.	.	NP_001138640, NP_001138641, NP_001308900, NP_722577	XP_011530923, XP_011530924, XP_011530925, XP_016858994	protein_coding	ENSG00000173567	165082	18989
ADGRF4	.	.	.	.	.	.	12.0157	11.4324	24.1442	0	0	0	0.301361	0.257893	0.0254274	0	0	0	adhesion G protein-coupled receptor F4 [Source:HGNC Symbol;Acc:HGNC:19011]	chr6:47624171-47689757	NM_153838	.	.	.	NP_722580	.	protein_coding	ENSG00000153294	221393	19011
ADGRF5	.	.	.	.	.	.	0	0.00493678	0.00519367	0	0	0	0	0	0	0	0	0	adhesion G protein-coupled receptor F5 [Source:HGNC Symbol;Acc:HGNC:19030]	chr6:46820248-46922680	NM_001098518, NM_015234	XM_017010423, XM_011514354, XM_011514353, XM_005248895, XM_005248894, XM_005248893, XM_005248892	.	.	NP_001091988, NP_056049	XP_005248949, XP_005248950, XP_005248951, XP_005248952, XP_011512655, XP_011512656, XP_016865908, XP_016865909, XP_016865910, XP_016865912	protein_coding	ENSG00000069122	221395	19030
ADGRG1	.	.	.	.	.	.	66.25	52.5746	64.3749	5.85592	4.38481	4.65631	3.57218	3.80443	4.21474	4.34233	5.63302	6.07881	adhesion G protein-coupled receptor G1 [Source:HGNC Symbol;Acc:HGNC:4512]	chr16:57653853-57699492	NM_001145770, NM_001145771, NM_001145772, NM_001145773, NM_001145774, NM_001290142, NM_001290143, NM_001290144, NM_005682, NM_201524, NM_201525	XM_017023892, XM_011523468, XM_011523467, XM_011523466, XM_011523465, XM_011523464, XM_011523463, XM_011523462, XM_011523461, XM_006721347, XM_006721346, XM_006721345, XM_006721344, XM_006721343, XM_006721342, XM_006721341, XM_006721340, XM_006721339, XM_006721338, XM_005256255, XM_005256254, XM_005256252, XM_005256251, XM_005256249, XM_005256248, XM_005256247, XM_005256246, XM_005256245, XM_0052…	.	.	NP_001139242, NP_001139243, NP_001139244, NP_001139245, NP_001139246, NP_001277071, NP_001277072, NP_001277073, NP_005673, NP_958932, NP_958933	XP_005256294, XP_005256295, XP_005256296, XP_005256297, XP_005256298, XP_005256299, XP_005256301, XP_005256302, XP_005256303, XP_005256304, XP_005256305, XP_005256306, XP_005256308, XP_005256309, XP_005256311, XP_005256312, XP_006721401, XP_006721402, XP_006721403, XP_006721404, XP_006721405, XP_006721406, XP_006721407, XP_006721408, XP_006721409, XP_006721410, XP_011521763, XP_011521764, XP_0115…	protein_coding	ENSG00000205336	9289	4512
ADGRG2	.	.	.	.	.	.	0.021072	0.13981	0.0971151	0	0	0	0	0	0	0	0	0	adhesion G protein-coupled receptor G2 [Source:HGNC Symbol;Acc:HGNC:4516]	chrX:19007426-19140755	NM_001079858, NM_001079859, NM_001079860, NM_001184833, NM_001184834, NM_001184835, NM_001184836, NM_001184837, NM_005756	XM_011545436, XM_011545435, XM_011545434, XM_011545433, XM_006724455	.	.	NP_001073327, NP_001073328, NP_001073329, NP_001171762, NP_001171763, NP_001171764, NP_001171765, NP_001171766, NP_005747	XP_006724518, XP_011543736, XP_011543737	protein_coding	ENSG00000173698	10149	4516
ADGRG3	◎	.	.	◎	.	◎	0.0206354	0.0484541	0.0345899	1.46846	2.30545	2.07954	4.09135	5.33316	2.35757	2.32036	1.40753	1.52939	adhesion G protein-coupled receptor G3 [Source:HGNC Symbol;Acc:HGNC:13728]	chr16:57702098-57723290	NM_001308360, NM_170776	XM_011522953, XM_011522952, XM_011522951, XM_005255842	.	.	NP_001295289, NP_740746	XP_005255899, XP_011521253, XP_011521254, XP_011521255	protein_coding	ENSG00000182885	222487	13728
ADGRG4	.	.	.	.	.	.	0	0.00636514	0.00324822	0	0	0	0	0	0	0	0	0	adhesion G protein-coupled receptor G4 [Source:HGNC Symbol;Acc:HGNC:18992]	chrX:135383121-135499047	NM_153834	XM_011531271, XM_011531270, XM_011531269, XM_011531268	.	.	NP_722576	XP_011529570, XP_011529571, XP_011529573	protein_coding	ENSG00000156920	139378	18992
ADGRG5	.	.	.	.	.	.	1.18335	0.702869	0.976649	0	0	0	0.025985	0	0	0	0	0	adhesion G protein-coupled receptor G5 [Source:HGNC Symbol;Acc:HGNC:19010]	chr16:57576332-57611107	NM_001304376, NM_153837	XM_011522950, XM_011522949, XM_006721169	.	.	NP_001291305, NP_722579	XP_006721232, XP_011521251, XP_011521252	protein_coding	ENSG00000159618	221188	19010
ADGRG6	.	.	◎	.	.	◎	4.76063	12.0535	10.0421	42.5243	101.323	102.563	77.0215	78.0143	116.682	123.116	42.4982	42.5505	adhesion G protein-coupled receptor G6 [Source:HGNC Symbol;Acc:HGNC:13841]	chr6:142622990-142767403	NM_001032394, NM_001032395, NM_020455, NM_198569	XM_011535964, XM_006715518, XM_006715517, XM_006715516, XM_005267061	.	.	NP_001027566, NP_001027567, NP_065188, NP_940971	XP_005267118, XP_006715579, XP_006715580, XP_006715581, XP_011534266, XP_016866574	protein_coding	ENSG00000112414	57211	13841
ADGRG7	.	.	.	.	.	.	0	0	0	0	0	0	0	0	0.0458919	0	0	0	adhesion G protein-coupled receptor G7 [Source:HGNC Symbol;Acc:HGNC:19241]	chr3:100328432-100414323	NM_001308362, NM_032787	XM_011513245, XM_005247839	.	.	NP_001295291, NP_116176	XP_005247896, XP_011511547	protein_coding	ENSG00000144820	84873	19241
ADGRL1	.	.	.	.	.	.	11.8438	3.84217	5.58123	0.834495	0.45508	0.74081	0.735957	0.669105	0.674949	0.606255	0.812641	0.856349	adhesion G protein-coupled receptor L1 [Source:HGNC Symbol;Acc:HGNC:20973]	chr19:14258554-14316999	NM_001008701, NM_014921	XM_017026479, XM_017026478, XM_011527801, XM_011527800, XM_011527799, XM_011527798, XM_011527797, XM_011527796, XM_005259819, XM_005259818	.	.	NP_001008701, NP_055736	XP_005259875, XP_011526098, XP_011526100, XP_011526103, XP_016881964, XP_016881965, XP_016881966, XP_016881967, XP_016881968, XP_016881969	protein_coding	ENSG00000072071	22859	20973
ADGRL2	.	.	.	.	.	.	0.652147	3.19237	0.90887	6.54884	10.3607	9.76496	8.51227	8.09485	10.2291	11.0797	6.37607	6.7216	adhesion G protein-coupled receptor L2 [Source:HGNC Symbol;Acc:HGNC:18582]	chr1:81771850-82458106	NM_001297704, NM_001297705, NM_001297706, NM_012302	XM_017000792, XM_017000790, XM_017000786, XM_017000785, XM_017000784, XM_011541096, XM_011541095, XM_011541094, XM_011541093, XM_006710497, XM_006710494, XM_006710493, XM_006710491, XM_006710490, XM_006710489, XM_006710488, XM_006710485, XM_005270673, XM_005270670, XM_005270668, XM_005270667, XM_005270666	.	.	NP_001284633, NP_001284634, NP_001284635, NP_036434	XP_005270723, XP_005270725, XP_005270727, XP_005270730, XP_006710548, XP_006710551, XP_006710552, XP_016856271, XP_016856272, XP_016856273, XP_016856274, XP_016856275, XP_016856276, XP_016856277, XP_016856278, XP_016856279, XP_016856280, XP_016856281, XP_016856286, XP_016856287	protein_coding	ENSG00000117114	23266	18582
ADGRL3	.	.	.	.	.	.	0	0.0177666	0	0.0125293	0.013954	0	0	0.00644653	0	0	0.0250586	0	adhesion G protein-coupled receptor L3 [Source:HGNC Symbol;Acc:HGNC:20974]	chr4:62066975-62944053	NM_001322246, NM_015236	XM_017007942, XM_017007940, XM_011531793, XM_011531792, XM_011531791, XM_011531790, XM_011531789, XM_011531788, XM_011531787, XM_011531786, XM_011531785, XM_011531784	.	.	NP_001309175, NP_001309331, NP_056051	XP_011530088, XP_011530090, XP_011530092, XP_011530093, XP_011530094, XP_011530095, XP_016863418, XP_016863419, XP_016863420, XP_016863421, XP_016863422, XP_016863423, XP_016863424, XP_016863425, XP_016863426, XP_016863427, XP_016863428, XP_016863429, XP_016863430, XP_016863431	protein_coding	ENSG00000150471	23284	20974
ADGRL4	.	.	.	.	.	.	0	0	0	0	0	0	0	0	0	0	0	0	adhesion G protein-coupled receptor L4 [Source:HGNC Symbol;Acc:HGNC:20822]	chr1:79355448-79472403	NM_022159	.	.	.	NP_071442	.	protein_coding	ENSG00000162618	64123	20822
ADGRV1	.	.	.	.	.	.	0	0.0182042	0.0176413	0.168424	0.399208	0.458977	0.141869	0.0992512	0.417408	0.176325	0.0962124	0.240635	adhesion G protein-coupled receptor V1 [Source:HGNC Symbol;Acc:HGNC:17416]	chr5:89854616-90460038	NM_032119	XM_017009969, XM_017009967, XM_017009965, XM_017009964, XM_017009963, XM_011543677, XM_011543676, XM_011543675	.	.	NP_115495	XP_016865452, XP_016865453, XP_016865454, XP_016865456, XP_016865458	protein_coding	ENSG00000164199	84059	17416
ADH1A	.	.	.	.	.	.	0	0	0	0.199917	0.0526902	0.116006	0	0	0	0	0.176386	0.223447	alcohol dehydrogenase 1A (class I), alpha polypeptide [Source:HGNC Symbol;Acc:HGNC:249]	chr4:100197523-100212185	NM_000667	.	.	.	NP_000658	.	protein_coding	ENSG00000187758	124	249
ADH1B	.	.	.	.	.	.	0	0	0	0.0718632	0	0	0	0	0	0	0.0440559	0.0996704	alcohol dehydrogenase 1B (class I), beta polypeptide [Source:HGNC Symbol;Acc:HGNC:250]	chr4:100226120-100242558	NM_000668, NM_001286650	.	.	.	NP_000659, NP_001273579	.	protein_coding	ENSG00000196616	125	250
ADH1C	.	.	.	.	.	.	0	0	0	0	0	0.0507088	0	0.0472694	0	0.0595828	0	0	alcohol dehydrogenase 1C (class I), gamma polypeptide [Source:HGNC Symbol;Acc:HGNC:251]	chr4:100257648-100274184	NM_000669	XM_011531589, XM_011531588	.	.	NP_000660	XP_011529890, XP_011529891	protein_coding	ENSG00000248144	126	251
ADH4	.	.	.	.	.	.	0	0.023743	0	30.3937	18.4076	17.1732	13.8919	12.824	15.4323	15.593	31.1366	29.6508	alcohol dehydrogenase 4 (class II), pi polypeptide [Source:HGNC Symbol;Acc:HGNC:252]	chr4:100044807-100065448	NM_000670, NM_001306171, NM_001306172	XM_011531591, XM_011531590	.	.	NP_000661, NP_001293100, NP_001293101	XP_011529892, XP_011529893, XP_016863202, XP_016863203, XP_016863204	protein_coding	ENSG00000198099	127	252
ADH5	◎	.	.	.	.	◎	117.651	107.4	92.8922	206.644	176.369	185.67	70.5128	73.766	141.231	139.399	211.278	202.01	alcohol dehydrogenase 5 (class III), chi polypeptide [Source:HGNC Symbol;Acc:HGNC:253]	chr4:99992128-100009902	NM_000671	.	.	.	NP_000662	.	protein_coding	ENSG00000197894	128	253
ADH6	◎	.	.	◎	.	◎	0	0	0	85.2228	59.8172	60.0894	14.5147	14.1729	41.2118	43.374	86.4613	83.9842	alcohol dehydrogenase 6 (class V) [Source:HGNC Symbol;Acc:HGNC:255]	chr4:100123794-100140694	NM_000672, NM_001102470	XM_005262731	.	.	NP_000663, NP_001095940	XP_005262788	protein_coding	ENSG00000172955	130	255
ADH7	.	.	.	.	.	.	0	0	0	0	0	0	0	0	0	0	0	0	alcohol dehydrogenase 7 (class IV), mu or sigma polypeptide [Source:HGNC Symbol;Acc:HGNC:256]	chr4:100333417-100356894	NM_000673, NM_001166504	.	.	.	NP_000664, NP_001159976	.	protein_coding	ENSG00000196344	131	256
ADHFE1	.	.	.	.	.	.	0.263371	0.485255	0.207392	1.10687	0.737215	0.632392	0.224764	0.12513	0.610138	0.848421	0.997666	1.21608	alcohol dehydrogenase, iron containing 1 [Source:HGNC Symbol;Acc:HGNC:16354]	chr8:67344720-67381142	NM_144650	.	.	.	NP_653251	.	protein_coding	ENSG00000147576	137872	16354
ADI1	.	.	.	.	.	.	56.3011	112.353	101.119	78.6249	61.3946	60.9147	32.3408	31.8171	52.7341	55.3471	79.1515	78.0982	acireductone dioxygenase 1 [Source:HGNC Symbol;Acc:HGNC:30576]	chr2:3501131-3523507	NM_001306077, NM_018269	XM_005264696	.	.	NP_001293006, NP_060739	XP_005264753	protein_coding	ENSG00000182551	55256	30576
ADIG	.	.	.	.	.	.	0	0	0	0.130183	0.122368	0	0.256995	0	0	0.156415	0.132326	0.12804	adipogenin [Source:HGNC Symbol;Acc:HGNC:28606]	chr20:37209837-37217104	NM_001018082	.	.	.	NP_001018092	.	protein_coding	ENSG00000182035	149685	28606
ADIPOQ	.	.	.	.	.	.	0	0	0	0	0	0	0	0	0	0.0234461	0	0	adiponectin, C1Q and collagen domain containing [Source:HGNC Symbol;Acc:HGNC:13633]	chr3:186560478-186576252	NM_001177800, NM_004797	XM_011513324	.	.	NP_001171271, NP_004788	XP_011511626	protein_coding	ENSG00000181092	9370	13633
ADIPOR1	.	.	.	.	.	.	82.587	133.954	108.23	42.4991	54.1423	54.2605	67.2885	69.8525	56.3366	60.946	42.5842	42.414	adiponectin receptor 1 [Source:HGNC Symbol;Acc:HGNC:24040]	chr1:202909950-202927517	NM_001290553, NM_001290557, NM_001290629, NM_015999	.	.	.	NP_001277482, NP_001277486, NP_001277558, NP_057083	.	protein_coding	ENSG00000159346	51094	24040
ADIPOR2	.	.	.	.	.	.	57.0707	74.3158	75.2673	33.7046	31.8893	31.5388	29.6126	29.2495	27.3139	26.8541	33.1639	34.2453	adiponectin receptor 2 [Source:HGNC Symbol;Acc:HGNC:24041]	chr12:1800192-1897844	NM_024551	XM_011521024, XM_006719018, XM_005253789	.	.	NP_078827	XP_005253846, XP_006719081, XP_011519326	protein_coding	ENSG00000006831	79602	24041
ADIRF	.	.	.	.	.	.	73.8394	38.0113	59.7177	0.221672	0.316912	0.225668	0	0.101079	0.317162	0.135408	0.222959	0.220385	adipogenesis regulatory factor [Source:HGNC Symbol;Acc:HGNC:24043]	chr10:88727948-88730672	NM_006829	.	.	.	NP_006820	.	protein_coding	ENSG00000148671	10974	24043
ADK	.	.	.	.	.	.	106.866	179.985	150.643	61.4669	75.0838	73.6317	61.8268	67.5647	68.431	71.8508	64.0929	58.841	adenosine kinase [Source:HGNC Symbol;Acc:HGNC:257]	chr10:75910942-76469061	NM_001123, NM_001202449, NM_001202450, NM_006721	XM_011539297	.	.	NP_001114, NP_001189378, NP_001189379, NP_006712	XP_016871190	protein_coding	ENSG00000156110	132	257
ADM	.	.	.	.	.	.	18.5296	103.23	33.8955	6.49878	9.32719	8.13277	7.02955	8.9773	7.62042	10.4278	7.11777	5.87979	adrenomedullin [Source:HGNC Symbol;Acc:HGNC:259]	chr11:10326226-10328944	NM_001124	.	.	.	NP_001115	.	protein_coding	ENSG00000148926	133	259
ADM2	◎	◎	.	◎	.	◎	0.944401	4.95291	0.436122	2.4586	2.46138	2.42944	16.7551	16.4596	5.44631	6.5193	2.28913	2.62807	adrenomedullin 2 [Source:HGNC Symbol;Acc:HGNC:28898]	chr22:50919984-50924869	NM_001253845, NM_024866	XM_017028940	.	.	NP_001240774, NP_079142	XP_016884429	protein_coding	ENSG00000128165	79924	28898
ADM5	.	.	.	.	.	.	1.8497	0.929734	2.48013	4.66532	6.18626	5.04917	4.99949	5.2664	5.46752	6.3274	5.06919	4.26144	adrenomedullin 5 (putative) [Source:HGNC Symbol;Acc:HGNC:27293]	chr19:50191920-50193832	NM_001101340	.	.	.	NP_001094810	.	protein_coding	ENSG00000224420	199800	27293
ADNP	.	.	.	.	.	.	33.6102	43.2114	43.6999	28.2948	24.0367	24.6061	19.5976	21.2626	24.0454	23.3885	27.3651	29.2245	activity dependent neuroprotector homeobox [Source:HGNC Symbol;Acc:HGNC:15766]	chr20:49505455-49547777	NM_001282531, NM_001282532, NM_015339, NM_181442	XM_017027759, XM_011528748, XM_011528747	.	.	NP_001269460, NP_001269461, NP_056154, NP_852107	XP_011527049, XP_011527050, XP_016883246, XP_016883247, XP_016883248	protein_coding	ENSG00000101126	23394	15766
ADNP2	.	.	.	.	.	.	5.84437	9.87087	8.74982	13.0659	12.0004	12.7381	16.4676	16.0615	13.794	13.9042	13.0182	13.1137	ADNP homeobox 2 [Source:HGNC Symbol;Acc:HGNC:23803]	chr18:77866914-77898234	NM_014913	XM_005266656	.	.	NP_055728	XP_005266713, XP_011524185	protein_coding	ENSG00000101544	22850	23803
ADO	.	.	.	.	.	.	9.97447	10.4983	11.9694	12.8538	13.7705	13.5785	13.9274	15.3969	13.4392	15.1092	12.8068	12.9009	2-aminoethanethiol dioxygenase [Source:HGNC Symbol;Acc:HGNC:23506]	chr10:64564616-64568243	NM_032804	.	.	.	NP_116193	.	protein_coding	ENSG00000181915	84890	23506
ADORA1	.	.	.	.	.	.	0.445999	0.23285	0.490037	0	0	0	0	0	0.141527	0	0	0	adenosine A1 receptor [Source:HGNC Symbol;Acc:HGNC:262]	chr1:203059781-203136533	NM_000674, NM_001048230	XM_011509204, XM_011509203, XM_005244902, XM_005244901	.	.	NP_000665, NP_001041695	XP_005244958, XP_005244959, XP_011507505, XP_011507506	protein_coding	ENSG00000163485	134	262
ADORA2A	.	.	.	.	.	.	1.59051	1.81169	1.74728	3.6805	3.87912	4.16038	5.6961	4.68244	4.10038	4.26696	3.54202	3.81898	adenosine A2a receptor [Source:HGNC Symbol;Acc:HGNC:263]	chr22:24819564-24838328	NM_000675, NM_001278497, NM_001278498, NM_001278499, NM_001278500	.	.	.	NP_000666, NP_001265426, NP_001265427, NP_001265428, NP_001265429	.	protein_coding	ENSG00000128271	135	263
ADORA2B	.	.	.	.	.	.	36.8219	19.9457	30.1288	4.24838	9.27521	7.69042	11.162	11.8181	9.81389	9.17666	4.48438	4.01239	adenosine A2b receptor [Source:HGNC Symbol;Acc:HGNC:264]	chr17:15848230-15879060	NM_000676	.	.	.	NP_000667	.	protein_coding	ENSG00000170425	136	264
ADPGK	.	.	.	.	.	.	32.4037	30.221	27.0773	24.2799	29.5042	30.924	29.1427	30.4382	34.6291	31.1852	23.6779	24.8818	ADP dependent glucokinase [Source:HGNC Symbol;Acc:HGNC:25250]	chr15:73043709-73076126	NM_031284	XM_006720713, XM_006720712	.	.	NP_112574	XP_006720775, XP_006720776	protein_coding	ENSG00000159322	83440	25250
ADPRH	.	.	.	.	.	.	2.06374	1.63471	1.06071	0.13787	0.0546158	0.160975	0.125491	0.116344	0.126194	0.147622	0.17823	0.0975103	ADP-ribosylarginine hydrolase [Source:HGNC Symbol;Acc:HGNC:269]	chr3:119298114-119308792	NM_001125, NM_001291949	XM_011512438	.	.	NP_001116, NP_001278878	XP_011510740	protein_coding	ENSG00000144843	141	269
ADPRHL1	.	.	.	.	.	.	1.8532	3.07284	1.41125	0.453557	0.11819	0.201998	0.168649	0.192463	0.122328	0.376001	0.458045	0.449069	ADP-ribosylhydrolase like 1 [Source:HGNC Symbol;Acc:HGNC:21303]	chr13:114053924-114107839	NM_138430, NM_199162	.	.	.	NP_612439, NP_954631	.	protein_coding	ENSG00000153531	113622	21303
ADPRHL2	.	.	.	.	.	.	46.6952	32.2331	33.9273	18.935	18.7812	18.3343	15.1996	14.1301	16.6804	17.4046	19.2333	18.6368	ADP-ribosylhydrolase like 2 [Source:HGNC Symbol;Acc:HGNC:21304]	chr1:36554475-36559533	NM_017825	.	.	.	NP_060295	.	protein_coding	ENSG00000116863	54936	21304
ADPRM	.	.	.	.	.	.	3.21378	6.13305	3.08879	5.46383	5.63968	5.32874	7.93541	9.1798	6.2061	5.78848	6.41011	4.51756	ADP-ribose/CDP-alcohol diphosphatase, manganese dependent [Source:HGNC Symbol;Acc:HGNC:30925]	chr17:10600910-10614550	NM_020233	XM_005256738	.	.	NP_064618	XP_005256795	protein_coding	ENSG00000170222	56985	30925
ADRA1A	.	.	.	.	.	.	0	0	0	0	0	0	0	0	0	0	0	0	adrenoceptor alpha 1A [Source:HGNC Symbol;Acc:HGNC:277]	chr8:26605666-26724790	NM_000680, NM_033302, NM_033303, NM_033304	XM_006716293, XM_006716292, XM_005273414	.	.	NP_000671, NP_001309433, NP_150645, NP_150646, NP_150647	XP_005273471, XP_006716355, XP_006716356, XP_011542713, XP_016868583, XP_016868584, XP_016868585	protein_coding	ENSG00000120907	148	277
ADRA1B	.	.	.	.	.	.	25.3064	6.27954	28.2739	0	0	0	0	0	0	0	0	0	adrenoceptor alpha 1B [Source:HGNC Symbol;Acc:HGNC:278]	chr5:159343789-159399551	NM_000679	.	.	.	NP_000670	.	protein_coding	ENSG00000170214	147	278
ADRA1D	.	.	.	.	.	.	0.0185428	0.015992	0.0356471	0.168968	0.0465301	0.0498434	0.647267	0.718667	0.279477	0.302902	0.241904	0.0960322	adrenoceptor alpha 1D [Source:HGNC Symbol;Acc:HGNC:280]	chr20:4201277-4229721	NM_000678	.	.	.	NP_000669	.	protein_coding	ENSG00000171873	146	280
ADRA2A	.	.	.	.	.	.	0	0.0238237	0.012974	0	0	0.0349929	0	0	0	0	0	0	adrenoceptor alpha 2A [Source:HGNC Symbol;Acc:HGNC:281]	chr10:112836920-112840665	NM_000681	.	.	.	NP_000672	.	protein_coding	ENSG00000150594	150	281
ADRA2B	.	.	.	.	.	.	0.228873	0.140219	0.386639	0	0	0	0	0	0	0	0	0	adrenoceptor alpha 2B [Source:HGNC Symbol;Acc:HGNC:282]	chr2:96778622-96781984	NM_000682	.	.	.	NP_000673	.	protein_coding	ENSG00000274286	151	282
ADRA2C	.	.	.	.	.	.	1.1799	0.293701	3.707	64.3317	61.7718	61.8017	34.1628	29.421	54.6885	48.0208	62.9303	65.733	adrenoceptor alpha 2C [Source:HGNC Symbol;Acc:HGNC:283]	chr4:3768074-3770253	NM_000683	.	.	.	NP_000674	.	protein_coding	ENSG00000184160	152	283
ADRB1	.	.	.	.	.	.	0.201607	0.18277	0.277304	0.0214729	0	0	0	0	0	0	0.0429458	0	adrenoceptor beta 1 [Source:HGNC Symbol;Acc:HGNC:285]	chr10:115803814-115806667	NM_000684	.	.	.	NP_000675	.	protein_coding	ENSG00000043591	153	285
ADRB2	.	.	.	.	.	.	6.97279	4.60654	19.6943	0	0	0	0	0	0	0	0	0	adrenoceptor beta 2 [Source:HGNC Symbol;Acc:HGNC:286]	chr5:148204807-148208250	NM_000024	.	.	.	NP_000015	.	protein_coding	ENSG00000169252	154	286
ADRB3	.	.	.	.	.	.	0	0.0286411	0.0313749	0	0	0	0	0	0	0	0	0	adrenoceptor beta 3 [Source:HGNC Symbol;Acc:HGNC:288]	chr8:37820508-37824483	NM_000025	.	.	.	NP_000016	.	protein_coding	ENSG00000188778	155	288
ADRM1	.	.	.	.	.	.	377.443	334.827	298.252	105.87	117.973	110.064	159.329	158.648	120.904	118.644	105.383	106.357	adhesion regulating molecule 1 [Source:HGNC Symbol;Acc:HGNC:15759]	chr20:60877148-60883918	NM_001281437, NM_001281438, NM_007002, NM_175573	XM_017027603, XM_011528503, XM_011528502, XM_005260257	.	.	NP_001268366, NP_001268367, NP_008933, NP_783163	XP_005260314, XP_011526804, XP_011526805, XP_016883091, XP_016883092, XP_016883093, XP_016883095, XP_016883096	protein_coding	ENSG00000130706	11047	15759
ADSL	.	.	.	.	.	.	111.886	42.0908	59.4132	46.7041	60.8073	58.458	65.4725	63.5638	59.8327	58.7728	49.6143	43.7939	adenylosuccinate lyase [Source:HGNC Symbol;Acc:HGNC:291]	chr22:40742506-40763008	NM_000026, NM_001123378	XM_011529980, XM_011529979, XM_011529978, XM_011529977, XM_011529976	.	.	NP_000017, NP_001116850	XP_011528279, XP_011528281, XP_011528282, XP_016884125, XP_016884126	protein_coding	ENSG00000239900	158	291
ADSS	.	.	.	.	.	.	28.4154	21.9384	26.9848	19.2954	24.4314	23.4753	23.8473	24.3147	23.6346	26.4262	19.3008	19.2899	adenylosuccinate synthase [Source:HGNC Symbol;Acc:HGNC:292]	chr1:244571795-244615436	NM_001126	XM_011544109, XM_011544108	.	.	NP_001117	XP_011542410	protein_coding	ENSG00000035687	159	292
ADSSL1	.	.	.	.	.	.	1.33467	0.842995	0.604081	2.39089	2.15572	1.73915	0.853637	1.0745	2.09213	2.02458	2.10189	2.67989	adenylosuccinate synthase like 1 [Source:HGNC Symbol;Acc:HGNC:20093]	chr14:105190522-105213647	NM_001320424, NM_152328, NM_199165	XM_011536415, XM_011536414, XM_011536412, XM_006720026	.	.	NP_001307353, NP_689541, NP_954634	XP_006720089, XP_011534714, XP_011534716	protein_coding	ENSG00000185100	122622	20093
ADTRP	.	.	.	.	.	.	1.58331	2.87444	0.878507	0	0	0	0	0	0	0	0	0	androgen dependent TFPI regulating protein [Source:HGNC Symbol;Acc:HGNC:21214]	chr6:11713756-11779403	NM_001143948, NM_032744	XM_011514959, XM_011514958, XM_005249454	.	.	NP_001137420, NP_116133	XP_005249511, XP_011513260, XP_011513261, XP_016866866	protein_coding	ENSG00000111863	84830	21214
AEBP1	.	.	.	.	.	.	1.77996	2.32093	2.80329	0.154653	0.130776	0.0922026	0.140666	0.195631	0.145379	0.165905	0.123187	0.18612	AE binding protein 1 [Source:HGNC Symbol;Acc:HGNC:303]	chr7:44143959-44154161	NM_001129	XM_011515162	NR_039792	.	NP_001120	XP_011513464	protein_coding	ENSG00000106624	100616346	303
AEBP2	.	.	.	.	.	.	18.299	17.5289	16.879	10.4819	11.4501	10.9073	13.6701	12.9671	12.0211	14.6885	10.5575	10.4063	AE binding protein 2 [Source:HGNC Symbol;Acc:HGNC:24051]	chr12:19556999-19675173	NM_001114176, NM_001267043, NM_153207	XM_006719031	.	.	NP_001107648, NP_001253972, NP_694939	XP_006719094, XP_016874295	protein_coding	ENSG00000139154	121536	24051
AEN	.	.	.	.	.	.	30.7026	20.1888	21.8254	35.9368	42.1351	44.3245	53.4604	55.0642	45.0484	45.5578	36.4375	35.436	apoptosis enhancing nuclease [Source:HGNC Symbol;Acc:HGNC:25722]	chr15:89164526-89175513	NM_022767	XM_011521905, XM_006720645, XM_005254967, XM_005254966	.	.	NP_073604	XP_005255023, XP_005255024, XP_006720708, XP_011520207, XP_016877978	protein_coding	ENSG00000181026	64782	25722
AES	.	.	.	.	.	.	104.604	71.2785	88.0083	90.555	108.203	113.407	90.1092	85.6412	99.0527	97.1363	88.3206	92.7893	amino-terminal enhancer of split [Source:HGNC Symbol;Acc:HGNC:307]	chr19:3052907-3063105	NM_001130, NM_198969, NM_198970	XM_011527745, XM_006722664	.	.	NP_001121, NP_945320, NP_945321	XP_006722727	protein_coding	ENSG00000104964	166	307
AF011889.5	.	.	.	.	.	.	0.652936	1.11919	1.06567	0.671495	0.707035	0.239939	0.268795	2.24067e-15	0.350985	0.114771	0.453492	0.889498	.	chrX:148558520-148615470	.	.	.	.	.	.	protein_coding	ENSG00000241489	.	.
AF131215.5	.	.	.	.	.	.	0	0.0189032	0.0174719	0	0	0	0	0	0	0	0	0	.	chr8:10754032-11058875	.	.	.	.	.	.	protein_coding	ENSG00000215346	.	.
AF165138.7	.	.	.	.	.	.	0.0454554	0	0	0	0	0	0	0	0	0	0	0	.	chr21:15966040-16031142	NM_001256579	.	.	.	NP_001243508	.	protein_coding	ENSG00000243440	.	.
AFAP1	.	.	.	.	.	.	43.0054	27.0596	39.9503	1.12286	1.45111	1.32688	1.57249	1.39632	1.5523	1.34748	1.24211	1.00361	actin filament associated protein 1 [Source:HGNC Symbol;Acc:HGNC:24017]	chr4:7760440-7941653	NM_001134647, NM_198595	XM_011513545, XM_011513544, XM_006713909, XM_006713908	.	.	NP_001128119, NP_940997	XP_006713972, XP_011511846, XP_016864024	protein_coding	ENSG00000196526	60312	24017
AFAP1L1	.	.	.	.	.	.	10.5532	6.14999	14.6685	0.339473	0.301843	0.371006	0.192845	0.189882	0.381626	0.402648	0.361519	0.317427	actin filament associated protein 1 like 1 [Source:HGNC Symbol;Acc:HGNC:26714]	chr5:148651433-148721365	NM_001146337, NM_152406	XM_005268373	.	.	NP_001139809, NP_689619	XP_016864525	protein_coding	ENSG00000157510	134265	26714
AFAP1L2	.	.	.	.	.	.	22.015	17.5719	20.8551	0	0	0	0	0	0	0	0	0	actin filament associated protein 1 like 2 [Source:HGNC Symbol;Acc:HGNC:25901]	chr10:116054582-116164515	NM_001001936, NM_001287824, NM_032550	XM_017016826, XM_017016825, XM_017016817, XM_017016816, XM_017016813, XM_017016812, XM_017016811, XM_017016810, XM_017016807, XM_011540290, XM_011540289, XM_011540285, XM_011540284, XM_011540282, XM_005270241, XM_005270237, XM_005270233	.	.	NP_001001936, NP_001274753, NP_115939	XP_005270290, XP_005270294, XP_005270298, XP_011538588, XP_011538591, XP_011538592, XP_016872293, XP_016872296, XP_016872299, XP_016872300, XP_016872301, XP_016872302, XP_016872305, XP_016872306, XP_016872314, XP_016872315	protein_coding	ENSG00000169129	84632	25901
AFF1	.	.	.	.	.	.	6.10834	17.138	15.5605	9.82739	7.54718	7.02376	8.97374	9.33563	8.38665	8.02069	10.132	9.52283	AF4/FMR2 family member 1 [Source:HGNC Symbol;Acc:HGNC:7135]	chr4:87856153-88062206	NM_001166693, NM_001313959, NM_005935	XM_011531974, XM_011531973, XM_005263013, XM_005263012, XM_005263011, XM_005263009, XM_005263007	.	.	NP_001160165, NP_001300888, NP_005926	XP_005263064, XP_005263066, XP_005263068, XP_005263070, XP_011530275	protein_coding	ENSG00000172493	4299	7135
AFF2	.	.	.	.	.	.	0.00776994	0.0180563	0	0	0	0	0	0	0	0	0	0	AF4/FMR2 family member 2 [Source:HGNC Symbol;Acc:HGNC:3776]	chrX:147582138-148082193	NM_001169122, NM_001169123, NM_001169124, NM_001169125, NM_001170628, NM_002025	.	.	.	NP_001162593, NP_001162594, NP_001162595, NP_001162596, NP_001164099, NP_002016	.	protein_coding	ENSG00000155966	2334	3776
AFF3	.	.	.	.	.	.	0	0.139975	0.0154517	0	0	0	0	0.0152571	0	0	0	0	AF4/FMR2 family member 3 [Source:HGNC Symbol;Acc:HGNC:6473]	chr2:100161880-100759037	NM_001025108, NM_002285	XM_011511177, XM_011511176, XM_011511175, XM_011511174, XM_011511173, XM_011511172, XM_011511171, XM_011511170, XM_011511169, XM_005263943	.	.	NP_001020279, NP_002276	XP_005264000, XP_011509471, XP_011509472, XP_011509473, XP_011509474, XP_011509475, XP_011509476, XP_011509477, XP_011509478, XP_011509479	protein_coding	ENSG00000144218	3899	6473
AFF4	.	.	.	.	.	.	10.8113	31.3239	17.997	12.5575	11.6306	11.5031	20.4715	20.8267	13.1404	13.7336	12.434	12.681	AF4/FMR2 family member 4 [Source:HGNC Symbol;Acc:HGNC:17869]	chr5:132211070-132299326	NM_014423	XM_006714587, XM_005271963	.	.	NP_055238	XP_005272020, XP_006714650	protein_coding	ENSG00000072364	27125	17869
AFG3L2	.	.	.	.	.	.	34.1729	24.3677	30.8757	27.2418	31.4273	33.523	34.8577	34.5687	33.5109	34.0399	27.6689	26.8147	AFG3 like matrix AAA peptidase subunit 2 [Source:HGNC Symbol;Acc:HGNC:315]	chr18:12308057-12377313	NM_006796	XM_011525601	.	.	NP_006787	XP_011523903	protein_coding	ENSG00000141385	10939	315
AFM	.	.	.	.	.	.	0	0	0	0.365488	0.245026	0.0788639	0	0	0.26626	0.223699	0.43221	0.298765	afamin [Source:HGNC Symbol;Acc:HGNC:316]	chr4:74347399-74369718	NM_001133	.	.	.	NP_001124	.	protein_coding	ENSG00000079557	173	316
AFMID	.	.	.	.	.	.	46.0871	20.4376	28.6327	157.778	143.324	139.955	97.1092	92.9394	127.086	124.897	155.375	160.181	arylformamidase [Source:HGNC Symbol;Acc:HGNC:20910]	chr17:76183397-76203782	NM_001010982, NM_001145526	XM_011524333, XM_011524328, XM_011524327, XM_011524326	.	.	NP_001010982, NP_001138998	XP_011522628, XP_011522629, XP_011522630, XP_011522635	protein_coding	ENSG00000183077	125061	20910
AFP	◎	.	.	◎	.	◎	0.0123049	0.53942	0.068168	6418.5	7456.51	7699.9	2638.2	2438.35	5635.31	5898.7	6448.62	6388.38	alpha fetoprotein [Source:HGNC Symbol;Acc:HGNC:317]	chr4:74301879-74321891	NM_001134	XM_011531704	.	.	NP_001125	.	protein_coding	ENSG00000081051	174	317
AFTPH	.	.	.	.	.	.	5.67018	16.2369	9.13506	20.8485	20.9986	21.5511	24.9439	22.7863	20.1166	22.4046	20.2168	21.4801	aftiphilin [Source:HGNC Symbol;Acc:HGNC:25951]	chr2:64751438-64820139	NM_001002243, NM_017657, NM_203437	XM_005264380	.	.	NP_001002243, NP_060127, NP_982261	XP_005264437	protein_coding	ENSG00000119844	54812	25951
AGA	.	.	.	.	.	.	4.25813	3.96467	6.92714	8.95495	11.0073	10.268	10	12.1629	11.8346	11.1099	8.97047	8.93943	aspartylglucosaminidase [Source:HGNC Symbol;Acc:HGNC:318]	chr4:178351923-178363657	NM_000027, NM_001171988	.	.	.	NP_000018, NP_001165459	.	protein_coding	ENSG00000038002	175	318
AGAP1	.	.	.	.	.	.	8.47666	11.833	9.53439	11.4344	15.2398	13.4966	13.9607	16.2459	14.6757	14.4406	11.6248	11.2439	ArfGAP with GTPase domain, ankyrin repeat and PH domain 1 [Source:HGNC Symbol;Acc:HGNC:16922]	chr2:236402732-237040444	NM_001037131, NM_001244888, NM_014914	XM_011510549, XM_011510548, XM_011510547, XM_006712239, XM_006712237, XM_006712235, XM_006712234, XM_005246059	.	.	NP_001032208, NP_001231817, NP_055729	XP_005246116, XP_006712297, XP_006712298, XP_006712300, XP_006712302, XP_011508849, XP_011508850, XP_011508851	protein_coding	ENSG00000157985	116987	16922
AGAP10	.	.	.	.	.	.	0.034824	0.0115745	0.00604814	0.0147278	0.0280747	0.0302466	0	0	0	0.0179031	0	0.0294555	ArfGAP with GTPase domain, ankyrin repeat and PH domain 9 [Source:HGNC Symbol;Acc:HGNC:23463]	chr10:47191843-47239738	NM_001190810	.	.	.	NP_001177739	.	protein_coding	ENSG00000204172	642517	23463
AGAP2	.	.	.	.	.	.	0.129204	0.289701	0.234959	0.322634	0.185368	0.125671	0.144939	0.0938902	0.289419	0.0930953	0.341627	0.30364	ArfGAP with GTPase domain, ankyrin repeat and PH domain 2 [Source:HGNC Symbol;Acc:HGNC:16921]	chr12:58117543-58135940	NM_001122772, NM_014770	XM_005268626, XM_005268625	.	.	NP_001116244, NP_055585	XP_005268682, XP_005268683, XP_016874261	protein_coding	ENSG00000135439	116986	16921
AGAP3	.	.	.	.	.	.	35.0686	17.9911	28.1184	25.2343	25.199	24.9568	25.8437	25.9729	24.3259	25.1894	23.2442	27.2243	ArfGAP with GTPase domain, ankyrin repeat and PH domain 3 [Source:HGNC Symbol;Acc:HGNC:16923]	chr7:150782953-150841523	NM_001042535, NM_001281300, NM_001308305, NM_031946	XM_017011734, XM_011515780, XM_005249942	.	.	NP_001036000, NP_001268229, NP_001295233, NP_001295234, NP_114152	XP_005249999, XP_011514082, XP_016867223	protein_coding	ENSG00000133612	116988	16923
AGAP4	.	.	.	.	.	.	0.0211374	0.0701556	0.020842	0.787567	0.900029	0.661725	0.609363	0.503695	0.794861	0.708475	0.81117	0.763963	ArfGAP with GTPase domain, ankyrin repeat and PH domain 4 [Source:HGNC Symbol;Acc:HGNC:23459]	chr10:46321041-46343205	NM_001276343, NM_133446	XM_006717622, XM_006717621, XM_005271800	.	.	NP_001263272, NP_597703	XP_016871153, XP_016871154, XP_016871155, XP_016871156	protein_coding	ENSG00000188234	119016	23459
AGAP5	.	.	.	.	.	.	0.923388	0.658877	0.483352	1.26747	1.34683	1.05761	2.03976	2.03431	1.614	1.19982	1.45996	1.07497	ArfGAP with GTPase domain, ankyrin repeat and PH domain 5 [Source:HGNC Symbol;Acc:HGNC:23467]	chr10:75434042-75457917	NM_001144000	.	.	.	NP_001137472	XP_016854942	protein_coding	ENSG00000172650	729092	23467
AGAP6	.	.	.	.	.	.	2.60828	3.42732	2.06819	5.41001	4.98051	4.15623	7.8348	8.83683	6.71944	5.74547	5.12775	5.69226	ArfGAP with GTPase domain, ankyrin repeat and PH domain 6 [Source:HGNC Symbol;Acc:HGNC:23466]	chr10:51741949-51770259	NM_001077665, NM_001291379	XM_017016270, XM_011539815, XM_011539812, XM_011539811	.	.	NP_001071133, NP_001278308	XP_011538117, XP_016871757, XP_016871758, XP_016871759, XP_016871760, XP_016871761	protein_coding	ENSG00000204149	414189	23466
AGAP8	.	.	.	.	.	.	1.11452	1.20453	0.974605	0.798538	0.68372	0.68179	0.652066	0.743546	0.964794	0.574814	0.666819	0.930257	ArfGAP with GTPase domain, ankyrin repeat and PH domain 8 [Source:HGNC Symbol;Acc:23464]	chr10:51224680-51371321	NM_001276344, NM_001276343, NM_001077686	XM_005277650	.	.	NP_001263273, NP_001263272, NP_001263272, NP_001263272, NP_001071154	XP_005277707, XP_005271859, XP_005270175	protein_coding	ENSG00000174194	119016	23464
AGAP9	.	.	.	.	.	.	0.180443	0.0902527	0.0610289	0.144375	0.200472	0.0733209	0.182261	0.135472	0	0.300508	0.111121	0.177629	ArfGAP with GTPase domain, ankyrin repeat and PH domain 9 [Source:HGNC Symbol;Acc:HGNC:23463]	chr10:48189611-48237508	NM_001190810	.	.	.	NP_001177739	.	protein_coding	ENSG00000204172	642517	23463
AGBL1	.	.	.	.	.	.	0	0	0	0	0	0	0	0	0	0	0	0	Cytosolic carboxypeptidase 4 [Source:UniProtKB/Swiss-Prot;Acc:Q96MI9]	chr15:86623203-87572283	NM_152336	XM_011521227, XM_011521226	.	.	.	XP_011519528, XP_011519529, XP_016877407	protein_coding	ENSG00000273540	123624	.
AGBL2	.	.	.	.	.	.	0.102789	0.0381722	0.0774225	0.924453	0.54937	0.406188	0.13044	0.232591	0.280361	0.509988	0.901059	0.947846	ATP/GTP binding protein like 2 [Source:HGNC Symbol;Acc:HGNC:26296]	chr11:47681142-47736921	NM_024783	XM_011520382, XM_011520379, XM_011520376, XM_011520375, XM_011520374, XM_011520373, XM_011520372, XM_006718328, XM_006718327, XM_005253140, XM_005253139, XM_005253138	.	XR_428852	NP_079059	XP_005253195, XP_005253196, XP_005253197, XP_006718390, XP_006718391, XP_011518674, XP_011518675, XP_011518676, XP_011518677, XP_011518678, XP_011518681, XP_011518684, XP_016873820	protein_coding	ENSG00000165923	79841	26296
AGBL3	.	.	.	.	.	.	0.0753186	0.0791764	0.115407	0.522938	0.402953	0.551056	0.130764	0.154599	0.276506	0.324922	0.538877	0.506999	ATP/GTP binding protein like 3 [Source:HGNC Symbol;Acc:HGNC:27981]	chr7:134671258-134832715	NM_178563	XM_017012138	.	.	NP_848658	XP_016867625, XP_016867626, XP_016867627	protein_coding	ENSG00000146856	340351	27981
AGBL4	.	.	.	.	.	.	0	0	0	0	0.231183	0.103269	0	0	0.0519918	0	0	0	ATP/GTP binding protein like 4 [Source:HGNC Symbol;Acc:HGNC:25892]	chr1:48998526-50489585	NM_032785	XM_011542309, XM_011542308, XM_006710986	.	.	NP_001310502, NP_001310503, NP_001310504, NP_116174	XP_011540610, XP_016858084, XP_016858085, XP_016858086	protein_coding	ENSG00000186094	84871	25892
AGBL5	.	.	.	.	.	.	21.6145	6.98679	12.4672	28.0981	25.9205	25.4883	14.6209	13.903	21.8907	20.5816	28.1116	28.0845	ATP/GTP binding protein like 5 [Source:HGNC Symbol;Acc:HGNC:26147]	chr2:27274545-27294641	NM_001035507, NM_021831	XM_011533013, XM_011533012, XM_011533011, XM_006712058, XM_005264477	.	.	NP_001030584, NP_068603	XP_005264534, XP_011531313, XP_011531314, XP_011531315	protein_coding	ENSG00000084693	60509	26147
AGER	.	.	.	.	.	.	2.21378	0.712534	1.54892	4.67998	3.80798	3.88674	3.09313	3.86833	4.19348	4.68274	4.61199	4.74797	advanced glycosylation end-product specific receptor [Source:HGNC Symbol;Acc:HGNC:320]	chr6:32148744-32152101	NM_001136, NM_001206929, NM_001206932, NM_001206934, NM_001206936, NM_001206940, NM_001206954, NM_001206966, NM_172197	.	.	.	NP_001127, NP_001193858, NP_001193861, NP_001193863, NP_001193865, NP_001193869, NP_001193883, NP_001193895, NP_751947	.	protein_coding	ENSG00000204305	177	320
AGFG1	.	.	.	.	.	.	31.0953	57.5722	46.6722	41.5701	41.2952	43.2736	63.3302	66.0253	43.5209	43.9111	41.8986	41.2416	ArfGAP with FG repeats 1 [Source:HGNC Symbol;Acc:HGNC:5175]	chr2:228336867-228425930	NM_001135187, NM_001135188, NM_001135189, NM_004504	XM_011511072, XM_006712480, XM_006712479, XM_006712478, XM_005246516	.	.	NP_001128659, NP_001128660, NP_001128661, NP_004495	XP_005246573, XP_006712541, XP_006712542, XP_006712543	protein_coding	ENSG00000173744	3267	5175
AGFG2	◎	.	.	.	.	◎	10.0553	5.57668	15.1531	41.481	42.3442	43.5174	17.9543	18.1582	35.1433	36.3208	39.612	43.35	ArfGAP with FG repeats 2 [Source:HGNC Symbol;Acc:HGNC:5177]	chr7:100136847-100165842	NM_006076	XM_017012112, XM_005250306	.	.	NP_006067	XP_005250363, XP_016867601	protein_coding	ENSG00000106351	3268	5177
AGGF1	.	.	.	.	.	.	4.84902	5.79767	4.097	9.28914	9.49456	9.77367	6.95472	6.79358	8.53967	8.67385	9.34466	9.23361	angiogenic factor with G-patch and FHA domains 1 [Source:HGNC Symbol;Acc:HGNC:24684]	chr5:76326209-76361059	NM_018046	.	.	.	NP_060516	.	protein_coding	ENSG00000164252	55109	24684
AGK	.	.	.	.	.	.	16.4018	17.9338	12.9571	11.7534	14.0973	14.7695	13.3143	14.5755	14.1439	13.7704	12.0911	11.4157	acylglycerol kinase [Source:HGNC Symbol;Acc:HGNC:21869]	chr7:141250988-141355044	NM_018238	XM_011516397	.	.	NP_060708	XP_011514699	protein_coding	ENSG00000006530	55750	21869
AGL	.	.	.	.	.	.	3.86113	4.23073	3.79449	7.01656	6.32808	6.60741	4.96999	5.06035	6.16843	6.71238	6.82622	7.2069	amylo-alpha-1, 6-glucosidase, 4-alpha-glucanotransferase [Source:HGNC Symbol;Acc:HGNC:321]	chr1:100315639-100389579	NM_000028, NM_000642, NM_000643, NM_000644, NM_000646	XM_005270557	.	.	NP_000019, NP_000633, NP_000634, NP_000635, NP_000637	XP_005270614	protein_coding	ENSG00000162688	178	321
AGMAT	.	.	.	.	.	.	9.97972	3.68902	3.94896	64.0982	76.8283	78.0328	45.7692	42.5762	64.5232	65.5262	63.6939	64.5025	agmatinase [Source:HGNC Symbol;Acc:HGNC:18407]	chr1:15853307-15911605	NM_024758	.	.	.	NP_079034	.	protein_coding	ENSG00000116771	79814	18407
AGMO	.	.	.	.	.	.	0	0.0175233	0	0.0187908	0	0.0398702	0.0773282	0.0728745	0.0764986	0	0	0.0375816	alkylglycerol monooxygenase [Source:HGNC Symbol;Acc:HGNC:33784]	chr7:15239942-15601640	NM_001004320	XM_011515402, XM_006715731, XM_006715730	.	.	NP_001004320	XP_006715793, XP_006715794, XP_011513704, XP_016867693	protein_coding	ENSG00000187546	392636	33784
AGO1	.	.	.	.	.	.	6.34248	5.67208	5.02511	6.02489	5.47482	5.27021	4.32179	4.99088	5.52085	5.20926	6.23684	5.81293	argonaute 1, RISC catalytic component [Source:HGNC Symbol;Acc:HGNC:3262]	chr1:36335408-36396129	NM_012199	XM_011541239, XM_011541238, XM_011541237, XM_011541236	.	.	NP_001304051, NP_001304052, NP_036331	XP_011539538, XP_011539540, XP_016856505, XP_016856506	protein_coding	ENSG00000092847	26523	3262
AGO2	◎	.	.	.	.	◎	13.9646	23.7086	24.883	8.50407	5.92476	6.01977	11.4593	12.6319	7.85661	8.53287	8.2956	8.71253	argonaute 2, RISC catalytic component [Source:HGNC Symbol;Acc:HGNC:3263]	chr8:141530254-141645718	NM_001164623, NM_012154	XM_017013317, XM_011516968, XM_011516967, XM_011516966, XM_011516965, XM_011516964	.	.	NP_001158095, NP_036286	XP_011515267, XP_011515268, XP_011515270, XP_016868806	protein_coding	ENSG00000123908	27161	3263
AGO3	.	.	.	.	.	.	5.55677	12.6219	8.93956	3.506	3.91422	2.85382	4.39377	6.44319	3.92097	4.24865	3.14982	3.86219	argonaute 3, RISC catalytic component [Source:HGNC Symbol;Acc:HGNC:18421]	chr1:36396318-36538101	NM_024852, NM_177422	XM_017000528, XM_017000527, XM_017000526, XM_017000525, XM_017000524, XM_011540882, XM_011540881, XM_011540880, XM_011540879, XM_005270576, XM_005270575	.	.	NP_079128, NP_803171	XP_005270632, XP_005270633, XP_011539181, XP_011539184, XP_016856012, XP_016856013, XP_016856014, XP_016856015, XP_016856016, XP_016856017	protein_coding	ENSG00000126070	192669	18421
AGO4	.	.	.	.	.	.	1.03122	1.87852	1.62036	5.36892	4.02796	3.91085	3.76447	4.32398	3.73469	4.40449	5.26137	5.47648	argonaute 4, RISC catalytic component [Source:HGNC Symbol;Acc:HGNC:18424]	chr1:36273772-36323491	NM_017629	XM_005270579, XM_005270578	.	.	NP_060099	XP_005270635, XP_005270636	protein_coding	ENSG00000134698	192670	18424
AGPAT1	.	.	.	.	.	.	36.8905	26.5254	28.0048	60.6159	49.1992	48.6863	39.7083	41.5193	49.9562	48.4575	60.6361	60.5956	1-acylglycerol-3-phosphate O-acyltransferase 1 [Source:HGNC Symbol;Acc:HGNC:324]	chr6:32132359-32145873	NM_006411, NM_032741	XM_011514234, XM_005248806, XM_005248805	NR_106779	.	NP_006402, NP_116130	XP_005248862, XP_005248863, XP_011512536	protein_coding	ENSG00000204310	102466190	324
AGPAT2	◎	.	.	◎	.	◎	94.3804	99.1904	80.2274	2.53352	2.00253	1.49116	5.59316	6.40416	2.48789	2.47585	2.19788	2.86915	1-acylglycerol-3-phosphate O-acyltransferase 2 [Source:HGNC Symbol;Acc:HGNC:325]	chr9:139567594-139581875	NM_001012727, NM_006412	.	.	.	NP_001012745, NP_006403	.	protein_coding	ENSG00000169692	10555	325
AGPAT3	.	.	.	.	.	.	29.6825	24.1496	21.0615	29.9587	23.5998	26.4676	25.3736	24.5311	23.6614	23.7664	29.9356	29.9819	1-acylglycerol-3-phosphate O-acyltransferase 3 [Source:HGNC Symbol;Acc:HGNC:326]	chr21:45285066-45406417	NM_001037553, NM_020132	XM_011529666, XM_011529665, XM_011529663, XM_011529662, XM_006724031, XM_006724030, XM_006724029, XM_005261160	.	.	NP_001032642, NP_064517	XP_005261217, XP_006724092, XP_006724093, XP_006724094, XP_011527964, XP_011527965, XP_011527967, XP_016883898, XP_016883899	protein_coding	ENSG00000160216	56894	326
AGPAT4	.	.	.	.	.	.	4.49413	2.48748	4.93289	0.153225	0.114426	0.200793	0.143749	0.228768	0.0405574	0.159139	0.134984	0.171465	1-acylglycerol-3-phosphate O-acyltransferase 4 [Source:HGNC Symbol;Acc:HGNC:20885]	chr6:161551010-161695093	NM_020133	XM_017011059, XM_006715514, XM_006715512, XM_005267053	.	.	NP_064518	XP_005267110, XP_006715575, XP_006715577, XP_016866548	protein_coding	ENSG00000026652	56895	20885
AGPAT5	.	.	.	.	.	.	14.026	16.3088	26.295	16.2645	27.2796	26.1665	36.1252	39.1612	25.4098	25.0932	16.7319	15.7971	1-acylglycerol-3-phosphate O-acyltransferase 5 [Source:HGNC Symbol;Acc:HGNC:20886]	chr8:6565877-6617187	NM_018361	.	.	.	NP_060831	.	protein_coding	ENSG00000155189	55326	20886
AGPS	.	.	.	.	.	.	11.1276	14.099	12.1171	21.3543	32.4751	33.0519	36.6516	35.5636	34.8282	35.3241	21.5847	21.1238	alkylglycerone phosphate synthase [Source:HGNC Symbol;Acc:HGNC:327]	chr2:178095032-178408564	NM_003659	XM_011512042, XM_011512041	.	.	NP_003650	XP_011510343, XP_011510344	protein_coding	ENSG00000018510	8540	327
AGR2	◎	.	.	◎	.	◎	1.4426	2.53178	1.21652	0.405259	1.45341	1.76507	42.0932	39.9012	2.03861	1.88888	0.249256	0.561262	anterior gradient 2, protein disulphide isomerase family member [Source:HGNC Symbol;Acc:HGNC:328]	chr7:16831434-16844704	NM_006408	XM_005249581	.	.	NP_006399	XP_005249638	protein_coding	ENSG00000106541	10551	328
AGR3	.	.	.	.	.	.	0	0	0	0	0	0	0	0	0	0	0	0	anterior gradient 3, protein disulphide isomerase family member [Source:HGNC Symbol;Acc:HGNC:24167]	chr7:16899028-16921611	NM_176813	XM_011515152, XM_005249627	.	.	NP_789783	XP_005249684, XP_011513454	protein_coding	ENSG00000173467	155465	24167
AGRN	◎	.	.	.	.	◎	108.245	34.7834	85.2886	68.1614	63.1673	62.5818	29.5885	29.1884	53.5374	53.7128	68.3645	67.9583	agrin [Source:HGNC Symbol;Acc:HGNC:329]	chr1:955502-991498	NM_001305275, NM_198576	XM_011541430, XM_011541429, XM_006710635, XM_005244749	.	.	NP_001292204, NP_940978	XP_005244806, XP_011539731	protein_coding	ENSG00000188157	375790	329
AGRP	.	.	.	.	.	.	0	0	0	0	0	0	0	0	0	0	0	0	agouti related neuropeptide [Source:HGNC Symbol;Acc:HGNC:330]	chr16:67516473-67517716	NM_001138	XM_011522927	.	.	NP_001129	XP_011521229	protein_coding	ENSG00000159723	181	330
AGT	◎	.	.	◎	.	◎	0	0	0	960.38	891.901	901.24	333.651	306.914	762.799	774.879	955.077	965.684	angiotensinogen [Source:HGNC Symbol;Acc:HGNC:333]	chr1:230838268-230850043	NM_000029	.	.	.	NP_000020	.	protein_coding	ENSG00000135744	183	333
AGTPBP1	.	.	.	.	.	.	2.19929	4.35764	3.85704	6.21725	5.68558	5.79145	6.85035	7.7467	5.94361	7.11605	5.75769	6.67681	ATP/GTP binding protein 1 [Source:HGNC Symbol;Acc:HGNC:17258]	chr9:88161453-88356944	NM_001286715, NM_001286717, NM_015239	XM_017014546, XM_011518418, XM_005251849, XM_005251848, XM_005251847	.	.	NP_001273644, NP_001273646, NP_056054	XP_005251904, XP_005251905, XP_005251906, XP_011516720, XP_016870033, XP_016870034, XP_016870035	protein_coding	ENSG00000135049	23287	17258
AGTR1	.	.	.	.	.	.	0	0.019518	0.0274797	0.408831	0.664651	0.246108	0.488477	0.476979	0.482514	0.2382	0.557222	0.260441	angiotensin II receptor type 1 [Source:HGNC Symbol;Acc:HGNC:336]	chr3:148415570-148460795	NM_000685, NM_004835, NM_009585, NM_031850, NM_032049	.	.	.	NP_000676, NP_004826, NP_033611, NP_114038, NP_114438	.	protein_coding	ENSG00000144891	185	336
AGTR2	.	.	.	.	.	.	0	0	0.0155066	0	0	0	0	0	0	0	0	0	angiotensin II receptor type 2 [Source:HGNC Symbol;Acc:HGNC:338]	chrX:115301974-115306225	NM_000686	XM_011537533	.	.	NP_000677	XP_011535835	protein_coding	ENSG00000180772	186	338
AGTRAP	.	.	.	.	.	.	171.337	95.7333	72.789	21.4347	23.632	23.1811	15.6218	15.2927	20.0389	20.2786	22.3012	20.5683	angiotensin II receptor associated protein [Source:HGNC Symbol;Acc:HGNC:13539]	chr1:11796140-11810828	NM_001040194, NM_001040195, NM_001040196, NM_001040197, NM_020350	XM_011541802, XM_011541800	.	.	NP_001035284, NP_001035285, NP_001035286, NP_001035287, NP_065083	XP_011540102, XP_011540104	protein_coding	ENSG00000177674	57085	13539
AGXT	◎	.	.	◎	.	◎	0	0.0163781	0.0178724	66.6678	44.8108	47.1712	10.1128	8.66169	32.452	28.7038	65.4798	67.8558	alanine-glyoxylate aminotransferase [Source:HGNC Symbol;Acc:HGNC:341]	chr2:241807895-241818537	NM_000030	.	.	.	NP_000021	.	protein_coding	ENSG00000172482	189	341
AGXT2	.	.	.	.	.	.	0	0	0	0.0752985	0.152067	0.108942	0	0	0.0535669	0	0.112599	0.0379977	alanine--glyoxylate aminotransferase 2 [Source:HGNC Symbol;Acc:HGNC:14412]	chr5:34998205-35048240	NM_031900	XM_011514078, XM_011514077, XM_005248338, XM_005248337	.	.	NP_001293102, NP_114106	XP_005248394, XP_005248395, XP_011512380, XP_016865237	protein_coding	ENSG00000113492	64902	14412
AHCTF1	.	.	.	.	.	.	8.62054	11.0094	10.4422	10.5744	11.2226	11.5217	12.7434	13.1738	12.4929	12.2466	10.7277	10.4211	AT-hook containing transcription factor 1 [Source:HGNC Symbol;Acc:HGNC:24618]	chr1:247002399-247094726	NM_001323342, NM_001323343, NM_015446	XM_011544157, XM_011544156, XM_006711759, XM_006711758	.	.	NP_001310271, NP_001310272, NP_056261	XP_006711821, XP_011542458, XP_011542459	protein_coding	ENSG00000153207	25909	24618
AHCY	.	.	.	.	.	.	517.248	183.618	289.84	251.88	245.478	251.976	211.659	210.936	253.548	254.471	255.169	248.591	adenosylhomocysteinase [Source:HGNC Symbol;Acc:HGNC:343]	chr20:32868073-32899608	NM_000687, NM_001161766	XM_011528660, XM_011528659, XM_011528658, XM_011528657, XM_011528656, XM_005260317, XM_005260316	.	.	NP_000678, NP_001155238, NP_001309013, NP_001309014, NP_001309015	XP_005260373, XP_005260374, XP_011526958, XP_011526959, XP_011526960, XP_011526961, XP_011526962, XP_016883197, XP_016883198	protein_coding	ENSG00000101444	191	343
AHCYL1	.	.	.	.	.	.	31.6469	43.608	31.286	33.1337	31.9873	30.1916	35.0977	36.4527	32.3487	32.0704	33.6739	32.5935	adenosylhomocysteinase like 1 [Source:HGNC Symbol;Acc:HGNC:344]	chr1:110527307-110566363	NM_001242673, NM_001242674, NM_001242675, NM_001242676, NM_006621	XM_011540535	.	.	NP_001229602, NP_001229603, NP_001229604, NP_001229605, NP_006612	XP_011538837	protein_coding	ENSG00000168710	10768	344
AHCYL2	.	.	.	.	.	.	3.16478	6.66784	4.48269	8.63048	6.3249	6.85715	6.66361	6.73926	6.94531	6.79491	8.97349	8.28748	adenosylhomocysteinase like 2 [Source:HGNC Symbol;Acc:HGNC:22204]	chr7:128864863-129070052	NM_001130720, NM_001130722, NM_001130723, NM_015328	XM_017011907, XM_017011906, XM_017011905, XM_017011904, XM_011515988, XM_011515987, XM_011515986, XM_005250237	.	.	NP_001124192, NP_001124194, NP_001124195, NP_056143	XP_005250294, XP_011514289, XP_011514290, XP_016867393, XP_016867394, XP_016867395, XP_016867396	protein_coding	ENSG00000158467	23382	22204
AHDC1	.	.	.	.	.	.	14.6017	9.60294	13.0537	4.0655	3.351	2.66525	2.45545	2.33807	2.79934	2.5236	4.1722	3.95879	AT-hook DNA binding motif containing 1 [Source:HGNC Symbol;Acc:HGNC:25230]	chr1:27860545-27930143	NM_001029882	XM_011541257, XM_011541256, XM_011541255, XM_005245852, XM_005245851, XM_005245850, XM_005245849, XM_005245848	.	.	NP_001025053	XP_005245905, XP_005245906, XP_005245907, XP_005245908, XP_005245909, XP_011539557, XP_011539558, XP_011539559	protein_coding	ENSG00000126705	27245	25230
AHI1	◎	.	.	.	.	◎	2.14162	2.40295	2.02205	2.39938	3.32764	2.9226	5.91322	7.01428	3.49107	3.83111	2.40712	2.39165	Abelson helper integration site 1 [Source:HGNC Symbol;Acc:HGNC:21575]	chr6:135604669-135818914	NM_001134830, NM_001134831, NM_001134832, NM_017651	XM_017010981, XM_017010977, XM_011535916, XM_011535915, XM_011535914, XM_011535913, XM_011535912, XM_011535911, XM_011535910	.	.	NP_001128302, NP_001128303, NP_001128304, NP_060121	XP_011534212, XP_011534213, XP_016866466, XP_016866467, XP_016866468, XP_016866469, XP_016866470, XP_016866471, XP_016866473	protein_coding	ENSG00000135541	54806	21575
AHNAK	.	.	.	.	.	.	78.1562	95.4055	116.094	21.2059	12.818	13.5737	8.25178	9.66905	13.0506	13.8145	21.1667	21.2452	AHNAK nucleoprotein [Source:HGNC Symbol;Acc:HGNC:347]	chr11:62201013-62314307	NM_001620, NM_024060	XM_011545250, XM_011545249, XM_005274245, XM_005274244, XM_005274243, XM_005274242, XM_005274241, XM_005274240	.	.	NP_001611, NP_076965	XP_005274297, XP_005274298, XP_005274302	protein_coding	ENSG00000124942	79026	347
AHNAK2	.	.	.	.	.	.	35.0631	37.9686	29.1963	0.0198813	0.0168654	0.0188547	0.038012	0.0516694	0.0360521	0.0654959	0.0033465	0.0364161	AHNAK nucleoprotein 2 [Source:HGNC Symbol;Acc:HGNC:20125]	chr14:105391152-105444694	NM_138420	XM_005267299	.	.	NP_612429	XP_005267356	protein_coding	ENSG00000185567	113146	20125
AHR	.	.	.	.	.	.	5.32791	6.80929	6.11175	10.8706	15.0402	14.9268	23.3655	22.9436	19.6343	20.8304	10.5411	11.2002	aryl hydrocarbon receptor [Source:HGNC Symbol;Acc:HGNC:348]	chr7:17338245-17506858	NM_001621	.	.	.	NP_001612	.	protein_coding	ENSG00000106546	196	348
AHRR	.	.	.	.	.	.	1.99282	2.21537	1.87469	0.256222	0.286674	0.171915	0.178162	0.343314	0.254632	0.269693	0.106514	0.405931	aryl-hydrocarbon receptor repressor [Source:HGNC Symbol;Acc:HGNC:346]	chr5:271735-438406	NM_001242412, NM_020731	.	.	.	NP_001229341, NP_065782	.	protein_coding	ENSG00000063438	57491	346
AHSA1	.	.	.	.	.	.	177.073	190.896	147.668	77.8147	91.5382	86.0109	109.138	112.118	88.6791	85.7996	76.9266	78.7028	activator of Hsp90 ATPase activity 1 [Source:HGNC Symbol;Acc:HGNC:1189]	chr14:77924372-77935817	NM_012111	XM_011536361	.	.	NP_001308370, NP_036243	XP_011534663	protein_coding	ENSG00000100591	10598	1189
AHSA2	.	.	.	.	.	.	6.24727	7.77969	5.97206	39.7061	35.7861	33.9132	31.8404	32.9371	39.2389	35.7374	39.2772	40.135	AHA1, activator of heat shock 90kDa protein ATPase homolog 2 (yeast) [Source:HGNC Symbol;Acc:HGNC:20437]	chr2:61404552-61697904	NM_001321300, NM_152392	XM_011532547, XM_011532544, XM_011532542	.	.	NP_001308229, NP_689605	XP_011530849	protein_coding	ENSG00000173209	130872	20437
AHSG	.	.	.	.	.	.	0.0420029	0.0423244	0	3586.49	4230.82	4268.94	2178.57	2102.64	3680.67	3680.98	3621.87	3551.12	alpha 2-HS glycoprotein [Source:HGNC Symbol;Acc:HGNC:349]	chr3:186330711-186339107	NM_001622	.	.	.	NP_001613	.	protein_coding	ENSG00000145192	197	349
AHSP	.	.	.	.	.	.	0	0	0	0	0	0	0	0	0	0	0	0	alpha hemoglobin stabilizing protein [Source:HGNC Symbol;Acc:HGNC:18075]	chr16:31539184-31540124	NM_001318221, NM_016633	XM_005255352, XM_005255351	.	.	NP_001305150, NP_001305151, NP_057717	XP_005255408, XP_005255409	protein_coding	ENSG00000169877	51327	18075
AICDA	.	.	.	.	.	.	0	0	0	0	0	0	0	0	0	0	0	0	activation induced cytidine deaminase [Source:HGNC Symbol;Acc:HGNC:13203]	chr12:8754761-8765467	NM_020661	XM_011520772	.	.	NP_065712	XP_011519074, XP_011519075	protein_coding	ENSG00000111732	57379	13203
AIDA	.	.	.	.	.	.	9.22481	16.0533	14.0301	11.6253	11.6519	9.81611	11.9415	11.7521	10.0916	11.9437	11.4964	11.7541	axin interactor, dorsalization associated [Source:HGNC Symbol;Acc:HGNC:25761]	chr1:222841354-222885866	NM_022831	.	.	.	NP_073742	.	protein_coding	ENSG00000186063	64853	25761
AIF1	.	.	.	.	.	.	0	0	0	1.31398	0.919335	1.09528	0.231339	0	0.56754	0.550479	0.831491	1.79647	allograft inflammatory factor 1 [Source:HGNC Symbol;Acc:HGNC:352]	chr6:31582960-31584798	NM_001318970, NM_001623, NM_004847, NM_032955	XM_005248871	.	.	NP_001305899, NP_001614, NP_116573	.	protein_coding	ENSG00000204472	199	352
AIF1L	◎	.	.	◎	.	◎	62.5223	19.2658	67.6494	22.94	21.5447	20.2217	7.02401	7.35219	15.0219	16.1007	23.2568	22.6231	allograft inflammatory factor 1 like [Source:HGNC Symbol;Acc:HGNC:28904]	chr9:133971862-133998539	NM_001185095, NM_001185096, NM_031426	XM_017015177	.	.	NP_001172024, NP_001172025, NP_113614	XP_016870666	protein_coding	ENSG00000126878	83543	28904
AIFM1	.	.	.	.	.	.	31.9526	21.1886	24.7323	31.8405	33.2063	31.7782	22.3286	22.9808	30.4116	29.506	32.2704	31.4107	apoptosis inducing factor, mitochondria associated 1 [Source:HGNC Symbol;Acc:HGNC:8768]	chrX:129263336-129299861	NM_001130846, NM_001130847, NM_004208, NM_145812, NM_145813	.	.	.	NP_001124318, NP_001124319, NP_004199, NP_665811, NP_665812	.	protein_coding	ENSG00000156709	9131	8768
AIFM2	.	.	.	.	.	.	19.0568	47.5462	19.1759	20.0404	26.3961	26.3296	45.0495	43.5636	27.6788	27.3819	21.1034	18.9773	apoptosis inducing factor, mitochondria associated 2 [Source:HGNC Symbol;Acc:HGNC:21411]	chr10:71812551-71892690	NM_001198696, NM_032797	.	.	.	NP_001185625, NP_116186	.	protein_coding	ENSG00000042286	84883	21411
AIFM3	◎	.	.	◎	.	◎	0.854291	0.241486	0.25907	10.6133	10.75	10.7859	4.57525	4.23921	11.565	10.5132	9.53878	11.6878	apoptosis inducing factor, mitochondria associated 3 [Source:HGNC Symbol;Acc:HGNC:26398]	chr22:21319395-21335649	NM_001018060, NM_001146288, NM_144704	.	.	.	NP_001018070, NP_001139760, NP_653305	.	protein_coding	ENSG00000183773	150209	26398
AIG1	.	.	.	.	.	.	38.2466	15.7181	43.2585	118.545	120.646	120.485	72.696	75.0783	92.4863	92.4502	123.217	113.873	androgen induced 1 [Source:HGNC Symbol;Acc:HGNC:21607]	chr6:143382012-143661441	NM_001286587, NM_001286588, NM_001286589, NM_016108	XM_011535885, XM_011535883, XM_005267010	.	.	NP_001273516, NP_001273517, NP_001273518, NP_057192	XP_005267067, XP_011534185, XP_011534186, XP_011534187, XP_016866416	protein_coding	ENSG00000146416	51390	21607
AIM1	◎	.	.	◎	.	◎	18.859	16.1529	23.5523	5.07635	5.36003	5.45978	1.85094	2.01353	3.88243	3.89572	4.8236	5.3291	absent in melanoma 1 [Source:HGNC Symbol;Acc:HGNC:356]	chr6:106808682-107077362	NM_001624	XM_005266839	.	.	NP_001615	XP_005266896	protein_coding	ENSG00000112297	202	356
AIM1L	.	.	.	.	.	.	14.8049	26.2826	14.1411	1.25431	1.04364	0.744437	0.782669	0.605226	0.735492	0.992883	1.35777	1.15084	absent in melanoma 1-like [Source:HGNC Symbol;Acc:HGNC:17295]	chr1:26648349-26680621	NM_001039775	XM_011541674, XM_011541673, XM_011541672, XM_005245918	.	.	NP_001034864	XP_005245975, XP_011539974, XP_011539975	protein_coding	ENSG00000176092	55057	17295
AIM2	.	.	.	.	.	.	0.132468	0.101553	0.0790061	0	0	0	0	0	0	0	0	0	absent in melanoma 2 [Source:HGNC Symbol;Acc:HGNC:357]	chr1:159032273-159046691	NM_004833	XM_005245616	.	.	NP_004824	XP_005245673, XP_016858337	protein_coding	ENSG00000163568	9447	357
AIMP1	.	.	.	.	.	.	19.3063	21.2943	17.5968	35.6129	31.104	29.0609	44.1795	44.8659	28.6794	26.1095	35.7736	35.4522	aminoacyl tRNA synthetase complex interacting multifunctional protein 1 [Source:HGNC Symbol;Acc:HGNC:10648]	chr4:106962755-107270383	NM_001142415, NM_001142416, NM_004757	.	.	.	NP_001135887, NP_001135888, NP_004748	XP_016864324, XP_016864325	protein_coding	ENSG00000164022	9255	10648
AIMP2	.	.	.	.	.	.	95.3946	28.9454	44.415	35.0571	49.1153	45.4529	57.4823	58.3036	47.6019	46.886	33.812	36.3023	aminoacyl tRNA synthetase complex interacting multifunctional protein 2 [Source:HGNC Symbol;Acc:HGNC:20609]	chr7:6048875-6098861	NM_006303	XM_005249850, XM_005249848	.	.	NP_001313536, NP_001313538, NP_001313539, NP_001313540, NP_006294	XP_005249905, XP_005249907	protein_coding	ENSG00000106305	7965	20609
AIP	.	.	.	.	.	.	56.0177	40.6602	43.1478	27.5028	28.6939	28.9856	31.1653	31.8991	27.6397	24.0229	28.546	26.4596	aryl hydrocarbon receptor interacting protein [Source:HGNC Symbol;Acc:HGNC:358]	chr11:67250511-67258574	NM_001302960, NM_003977	.	.	.	NP_001289889, NP_003968	.	protein_coding	ENSG00000110711	9049	358
AIPL1	.	.	.	.	.	.	0	0	0	0	0	0	0	0	0	0	0	0	aryl hydrocarbon receptor interacting protein like 1 [Source:HGNC Symbol;Acc:HGNC:359]	chr17:6327056-6338519	NM_001033054, NM_001033055, NM_001285399, NM_001285400, NM_001285401, NM_001285402, NM_001285403, NM_014336	.	.	.	NP_001028226, NP_001028227, NP_001272328, NP_001272329, NP_001272330, NP_001272331, NP_001272332, NP_055151	.	protein_coding	ENSG00000129221	23746	359
AIRE	.	.	.	.	.	.	0	0	0	0	0	0	0	0	0	0	0	0	autoimmune regulator [Source:HGNC Symbol;Acc:HGNC:360]	chr21:45705762-45718102	NM_000383	XM_011529551	.	.	NP_000374	.	protein_coding	ENSG00000160224	326	360
AJAP1	.	.	.	.	.	.	1.53114	3.44225	5.73777	0	0	0	0	0	0	0	0	0	adherens junctions associated protein 1 [Source:HGNC Symbol;Acc:HGNC:30801]	chr1:4714791-4852594	NM_001042478, NM_018836	XM_011541787, XM_011541786	.	.	NP_001035943, NP_061324	XP_011540088, XP_011540089	protein_coding	ENSG00000196581	55966	30801
AJUBA	.	.	.	.	.	.	74.775	57.4304	78.0038	108.66	111.855	116.508	63.53	61.0354	111.139	108.407	106.34	110.98	ajuba LIM protein [Source:HGNC Symbol;Acc:HGNC:20250]	chr14:23415436-23451851	NM_032876, NM_198086	.	.	.	NP_116265, NP_932352	.	protein_coding	ENSG00000129474	84962	20250
AK1	.	.	.	.	.	.	85.8365	58.0959	48.3849	11.0008	9.98313	9.12428	10.3438	13.0373	8.57071	9.00218	10.4792	11.5225	adenylate kinase 1 [Source:HGNC Symbol;Acc:HGNC:361]	chr9:130628758-130640022	NM_000476, NM_001318121, NM_001318122	XM_011518348, XM_005251786	.	.	NP_000467, NP_001305050, NP_001305051	XP_005251843, XP_011516650, XP_016869916, XP_016869917	protein_coding	ENSG00000106992	203	361
AK2	.	.	.	.	.	.	255.006	104.721	130.707	55.0883	88.2667	89.742	135.319	123.421	85.6403	81.9399	57.9514	52.2252	adenylate kinase 2 [Source:HGNC Symbol;Acc:HGNC:362]	chr1:33473540-33502593	NM_001199199, NM_001319139, NM_001319142, NM_001319143, NM_001625, NM_013411	XM_011540967	.	.	NP_001186128, NP_001306068, NP_001306070, NP_001306071, NP_001306072, NP_001616, NP_037543	XP_011539269	protein_coding	ENSG00000004455	204	362
AK3	.	.	.	.	.	.	15.2936	17.243	15.3363	99.2894	91.6157	94.6187	71.1074	69.6034	84.7855	92.0079	100.424	98.1548	adenylate kinase 3 [Source:HGNC Symbol;Acc:HGNC:17376]	chr9:4709558-4742043	NM_001199852, NM_001199853, NM_001199855, NM_001199856, NM_016282	.	.	.	NP_001186781, NP_001186782, NP_001186784, NP_001186785, NP_057366	.	protein_coding	ENSG00000147853	50808	17376
AK4	.	.	.	.	.	.	29.3101	9.21399	28.2509	47.1099	40.4422	40.4028	23.0432	21.8192	32.4754	36.036	45.994	48.2259	adenylate kinase 4 [Source:HGNC Symbol;Acc:HGNC:363]	chr1:65613231-65697828	NM_001005353, NM_013410, NM_203464	XM_017000613, XM_017000612	.	.	NP_001005353, NP_037542, NP_982289	XP_016856101, XP_016856102	protein_coding	ENSG00000162433	205	363
AK5	.	.	.	.	.	.	0	0.160031	0	0	0.0215506	0	0	0.021932	0	0	0	0	adenylate kinase 5 [Source:HGNC Symbol;Acc:HGNC:365]	chr1:77747735-78025654	NM_012093, NM_174858	XM_017001009, XM_017001008, XM_006710572, XM_005270739	.	.	NP_036225, NP_777283	XP_005270796, XP_006710635, XP_016856497, XP_016856498	protein_coding	ENSG00000154027	26289	365
AK6	.	.	.	.	.	.	17.4618	40.9018	22.2042	22.7144	26.7143	23.7779	35.2269	34.288	26.6011	29.8092	20.4681	24.9608	adenylate kinase 6 [Source:HGNC Symbol;Acc:HGNC:49151]	chr5:68646810-68710628	NM_001015891, NM_016283	.	.	.	NP_001015891, NP_057367	.	protein_coding	ENSG00000085231	102157402	49151
AK7	.	.	.	.	.	.	1.14302	0.27486	0.221181	0.734234	0.106479	0.447128	0.154811	0	0.137195	0	0.736773	0.731695	adenylate kinase 7 [Source:HGNC Symbol;Acc:HGNC:20091]	chr14:96858447-96955764	NM_152327	XM_011536404, XM_011536403, XM_006720022, XM_006720021	.	.	NP_689540	XP_006720084, XP_006720085, XP_011534705, XP_016876445	protein_coding	ENSG00000140057	122481	20091
AK8	.	.	.	.	.	.	0.540075	0.166913	0.1307	0.0791441	0	0.040228	0	0.0727842	0	0	0.119482	0.0388067	adenylate kinase 8 [Source:HGNC Symbol;Acc:HGNC:26526]	chr9:135600964-135765588	NM_152572	XM_011518278, XM_006716965, XM_006716964, XM_005272169	.	.	NP_689785	XP_005272226, XP_006717028, XP_011516580	protein_coding	ENSG00000165695	158067	26526
AK9	.	.	.	.	.	.	0.581764	1.20551	0.592415	2.20624	2.50039	2.38714	2.56176	1.90976	2.23616	2.18484	2.18917	2.22331	adenylate kinase 9 [Source:HGNC Symbol;Acc:HGNC:33814]	chr6:109814058-110012420	NM_001145128, NM_145025	XM_017010385, XM_011535554, XM_011535553, XM_011535552, XM_011535551, XM_011535550, XM_006715376	.	.	NP_001138600, NP_001316531, NP_659462	XP_006715439, XP_011533852, XP_011533854, XP_011533855, XP_011533856, XP_016865874	protein_coding	ENSG00000155085	221264	33814
AKAIN1	.	.	.	.	.	.	0	0	0	0	0	0	0	0	0	0	0	0	A kinase (PRKA) anchor inhibitor 1 [Source:HGNC Symbol;Acc:HGNC:28285]	chr18:5145283-5197502	NM_001145194	XM_011525728	.	.	NP_001138666	XP_011524030	protein_coding	ENSG00000231824	642597	28285
AKAP1	.	.	.	.	.	.	37.3196	16.514	33.363	57.289	47.2363	47.9367	27.4	29.9159	41.2271	42.7629	56.854	57.724	A-kinase anchoring protein 1 [Source:HGNC Symbol;Acc:HGNC:367]	chr17:55162550-55198710	NM_001242902, NM_001242903, NM_003488	XM_011525318, XM_005257709, XM_005257707	.	.	NP_001229831, NP_001229832, NP_003479	XP_005257764, XP_005257766, XP_011523620, XP_016880678, XP_016880679, XP_016880680	protein_coding	ENSG00000121057	8165	367
AKAP10	.	.	.	.	.	.	7.47476	12.4124	10.3106	6.40495	6.88531	6.67505	7.77877	8.80211	7.47472	6.9714	6.01995	6.78995	A-kinase anchoring protein 10 [Source:HGNC Symbol;Acc:HGNC:368]	chr17:19807614-19881150	NM_007202	XM_006721432, XM_006721431	.	.	NP_009133	XP_006721495, XP_016879560	protein_coding	ENSG00000108599	11216	368
AKAP11	.	.	.	.	.	.	4.15134	5.75674	5.32726	6.03685	5.77456	5.47774	4.71254	4.69257	5.93776	6.2789	6.27191	5.8018	A-kinase anchoring protein 11 [Source:HGNC Symbol;Acc:HGNC:369]	chr13:42846288-42897403	NM_016248	XM_017020383, XM_017020382, XM_017020381, XM_011534906, XM_011534905, XM_011534904, XM_011534903, XM_005266249, XM_005266248, XM_005266247	.	.	NP_057332	XP_005266304, XP_005266305, XP_005266306, XP_005266307, XP_011533205, XP_011533206, XP_011533207, XP_011533208, XP_016875870, XP_016875871, XP_016875872	protein_coding	ENSG00000023516	11215	369
AKAP12	◎	◎	.	◎	.	◎	5.98782	20.192	24.9088	4.1019	5.17067	5.01293	43.2183	45.2928	11.1459	10.7416	4.18516	4.01864	A-kinase anchoring protein 12 [Source:HGNC Symbol;Acc:HGNC:370]	chr6:151561133-151679692	NM_005100, NM_144497	XM_017011517, XM_005267235, XM_005267233	.	.	NP_005091, NP_653080	XP_005267290, XP_005267292, XP_016867006, XP_016867007	protein_coding	ENSG00000131016	9590	370
AKAP13	.	.	.	.	.	.	7.86923	11.679	9.46613	4.6889	3.96988	4.17682	5.68692	6.58174	4.26143	4.02206	4.79449	4.58331	A-kinase anchoring protein 13 [Source:HGNC Symbol;Acc:HGNC:371]	chr15:85923870-86292589	NM_001270546, NM_006738, NM_007200	.	NR_106993	.	NP_001257475, NP_006729, NP_009131	.	protein_coding	ENSG00000170776	102465803	371
AKAP14	.	.	.	.	.	.	0	0	0	0.668215	0.0751451	0.657881	0	0.0766607	0.301553	0.280133	0.543691	0.79274	A-kinase anchoring protein 14 [Source:HGNC Symbol;Acc:HGNC:24061]	chrX:119029799-119077735	NM_001008534, NM_001008535, NM_178813	.	.	.	NP_001008534, NP_001008535, NP_848928	.	protein_coding	ENSG00000186471	158798	24061
AKAP17A	.	.	.	.	.	.	3.09558	5.18249	4.07483	3.98221	3.83042	4.43662	7.10757	7.54528	4.04137	4.21806	3.92589	4.03854	A-kinase anchoring protein 17A [Source:HGNC Symbol;Acc:HGNC:18783], mapped to PAR; chrY:1660485-1671407	chrX:1710485-1721407	NM_005088	.	.	.	NP_005079	.	protein_coding	ENSG00000197976	8227	18783
AKAP2	.	.	.	.	.	.	26.5604	48.4729	51.2236	3.87953	4.5562	3.92984	2.30654	2.99641	5.00899	4.34353	3.45704	4.30202	A-kinase anchoring protein 2 [Source:HGNC Symbol;Acc:HGNC:372]	chr9:112403067-112934792	NM_001004065, NM_001136562, NM_001198656	.	.	.	NP_001004065, NP_001130034, NP_001185585	.	protein_coding	ENSG00000241978	11217	372
AKAP3	.	.	.	.	.	.	0.216559	0.10572	0.115749	0.0990865	0.128321	0.182016	0.0200231	0.0186331	0.0583815	0.0934846	0.0813442	0.116829	A-kinase anchoring protein 3 [Source:HGNC Symbol;Acc:HGNC:373]	chr12:4724673-4758213	NM_001278309, NM_006422	XM_011520910, XM_011520909, XM_011520908, XM_005253664	.	.	NP_001265238, NP_006413	XP_005253721, XP_011519210, XP_011519211, XP_011519212	protein_coding	ENSG00000111254	10566	373
AKAP4	.	.	.	.	.	.	0	0	0	0	0	0	0	0	0	0	0	0	A-kinase anchoring protein 4 [Source:HGNC Symbol;Acc:HGNC:374]	chrX:49955410-49965664	NM_003886, NM_139289	.	.	.	NP_003877, NP_647450	.	protein_coding	ENSG00000147081	8852	374
AKAP5	.	.	.	.	.	.	0.339886	0.441749	0.398391	0.184307	0.241342	0.302755	0.0545363	0.0714486	0.184273	0.335749	0.188668	0.179946	A-kinase anchoring protein 5 [Source:HGNC Symbol;Acc:HGNC:375]	chr14:64854748-65000408	NM_004857	.	.	.	NP_004848	.	protein_coding	ENSG00000179841	9495	375
AKAP6	.	.	.	.	.	.	0.162455	0.123802	0.099622	0.212792	0.124969	0.152274	0.0307921	0.0749512	0.0745809	0.151712	0.181414	0.244169	A-kinase anchoring protein 6 [Source:HGNC Symbol;Acc:HGNC:376]	chr14:32798478-33306887	NM_004274	XM_005268219	.	.	NP_004265	XP_016877297	protein_coding	ENSG00000151320	9472	376
AKAP7	.	.	.	.	.	.	1.25972	0.749521	0.869981	7.18384	7.91908	8.23615	5.92504	6.05151	7.27964	6.34021	6.94014	7.42754	A-kinase anchoring protein 7 [Source:HGNC Symbol;Acc:HGNC:377]	chr6:131456805-131604675	NM_004842, NM_016377, NM_138633	XM_017011510, XM_017011509, XM_005267229, XM_005267228	.	.	NP_004833, NP_057461, NP_619539	XP_005267285, XP_005267286, XP_016866997, XP_016866998, XP_016866999	protein_coding	ENSG00000118507	9465	377
AKAP8	.	.	.	.	.	.	19.2767	20.8648	23.6442	11.222	12.0815	11.459	16.6793	16.6712	13.0146	12.199	10.9076	11.5364	A-kinase anchoring protein 8 [Source:HGNC Symbol;Acc:HGNC:378]	chr19:15464195-15490603	NM_005858	XM_017026141	.	.	NP_005849	XP_016881630	protein_coding	ENSG00000105127	10270	378
AKAP8L	.	.	.	.	.	.	40.3645	55.018	49.5664	31.9517	26.3673	27.8181	29.9809	29.5641	27.4555	24.8294	32.3063	31.597	A-kinase anchoring protein 8 like [Source:HGNC Symbol;Acc:HGNC:29857]	chr19:15490858-15529865	NM_001291478, NM_014371	XM_005259854	.	.	NP_001278407, NP_055186	XP_005259911	protein_coding	ENSG00000011243	26993	29857
AKAP9	.	.	.	.	.	.	2.13844	3.86001	3.11534	7.58088	7.15479	6.99456	8.80559	8.708	7.69713	8.23133	7.55845	7.60331	A-kinase anchoring protein 9 [Source:HGNC Symbol;Acc:HGNC:379]	chr7:91570180-91739987	NM_005751, NM_147185	XM_011515720, XM_011515719, XM_011515718, XM_011515717, XM_011515716, XM_011515714, XM_011515713, XM_011515712, XM_011515711, XM_011515710, XM_011515709, XM_006715827	.	.	NP_005742, NP_671714	XP_016867137, XP_016867139	protein_coding	ENSG00000127914	10142	379
AKIP1	.	.	.	.	.	.	24.1599	17.9324	11.0775	7.34599	6.99896	7.48343	6.91366	7.30103	6.81232	6.12536	7.97904	6.71294	A-kinase interacting protein 1 [Source:HGNC Symbol;Acc:HGNC:1170]	chr11:8932685-8954536	NM_001206646, NM_001206647, NM_001206648, NM_020642	XM_017018011, XM_006718264	.	.	NP_001193575, NP_001193576, NP_001193577, NP_065693	XP_006718327, XP_016873500, XP_016873501	protein_coding	ENSG00000166452	56672	1170
AKIRIN1	.	.	.	.	.	.	39.5978	73.5634	68.0344	42.9267	84.9903	78.0494	75.009	71.4045	91.63	90.0817	41.5653	44.2881	akirin 1 [Source:HGNC Symbol;Acc:HGNC:25744]	chr1:39456894-39471731	NM_001136275, NM_024595	.	.	.	NP_001129747, NP_078871	.	protein_coding	ENSG00000174574	79647	25744
AKIRIN2	.	.	.	.	.	.	36.9779	57.9136	46.3019	36.89	24.3326	26.8177	30.2837	26.4559	23.2968	22.7737	34.9818	38.7983	akirin 2 [Source:HGNC Symbol;Acc:HGNC:21407]	chr6:88384789-88411927	NM_018064	.	.	.	NP_060534	.	protein_coding	ENSG00000135334	55122	21407
AKNA	◎	.	.	◎	.	◎	7.34264	4.38672	6.3873	4.57015	2.79138	2.36653	11.5745	12.308	4.12038	3.44971	5.13961	4.00069	AT-hook transcription factor [Source:HGNC Symbol;Acc:HGNC:24108]	chr9:117096435-117156685	NM_001317950, NM_001317952, NM_030767	XM_017015172, XM_011519066, XM_011519065, XM_011519063, XM_011519062, XM_011519061, XM_011519060, XM_011519059, XM_006717295, XM_006717294, XM_005252248, XM_005252247, XM_005252245, XM_005252244, XM_005252243	.	.	NP_001304879, NP_001304881, NP_110394	XP_005252300, XP_005252301, XP_005252302, XP_005252304, XP_005252305, XP_006717357, XP_006717358, XP_011517361, XP_011517365, XP_011517367, XP_011517368, XP_016870661	protein_coding	ENSG00000106948	80709	24108
AKNAD1	.	.	.	.	.	.	0.299279	0.26525	0.576688	0	0	0	0	0	0	0.0248735	0	0	AKNA domain containing 1 [Source:HGNC Symbol;Acc:HGNC:28398]	chr1:109358519-109506106	NM_152763	.	.	.	NP_689976	.	protein_coding	ENSG00000162641	254268	28398
AKR1A1	.	.	.	.	.	.	93.1496	45.7384	39.5179	92.2765	98.9105	97.2607	88.3804	84.7642	98.906	99.1327	95.8201	88.7329	aldo-keto reductase family 1 member A1 [Source:HGNC Symbol;Acc:HGNC:380]	chr1:46016214-46035721	NM_001202413, NM_001202414, NM_006066, NM_153326	XM_011540492	.	.	NP_001189342, NP_001189343, NP_006057, NP_697021	XP_011538794	protein_coding	ENSG00000117448	10327	380
AKR1B1	.	.	.	.	.	.	148.908	238.425	338.22	51.9727	58.3934	61.7273	59.9025	59.3629	48.8342	48.2906	54.7922	49.1532	aldo-keto reductase family 1 member B [Source:HGNC Symbol;Acc:HGNC:381]	chr7:134127101-134143894	NM_001628	XM_005250234	.	.	NP_001619	XP_005250291	protein_coding	ENSG00000085662	231	381
AKR1B10	◎	.	.	◎	.	◎	0.367887	8.69516	0.592745	14.5694	22.0205	22.0311	97.252	99.2623	25.05	24.847	13.8889	15.25	aldo-keto reductase family 1 member B10 [Source:HGNC Symbol;Acc:HGNC:382]	chr7:134212343-134226160	NM_020299	XM_011516416	.	.	NP_064695	XP_011514718	protein_coding	ENSG00000198074	57016	382
AKR1B15	.	.	.	.	.	.	0.117178	0.289024	0.0946075	0.116296	0.0671963	0.150475	0.640748	0.403508	0.140021	0.254537	0.0729471	0.159646	aldo-keto reductase family 1 member B15 [Source:HGNC Symbol;Acc:HGNC:37281]	chr7:134233887-134264627	NM_001080538	XM_011516242	.	.	NP_001074007	XP_011514544, XP_016867713	protein_coding	ENSG00000227471	441282	37281
AKR1C1	◎	.	.	◎	.	◎	3.41345	588.5	19.4514	411.984	203.803	232.093	592.222	582.125	163.762	181.137	385.027	438.941	aldo-keto reductase family 1 member C1 [Source:HGNC Symbol;Acc:HGNC:384]	chr10:5005444-5025475	NM_001353	.	.	.	NP_001344	.	protein_coding	ENSG00000187134	1645	384
AKR1C2	◎	.	◎	◎	.	◎	4.2905	36.7175	3.49748	85.8403	34.3599	39.8861	94.8691	99.1396	28.2569	30.4437	82.3674	89.3131	aldo-keto reductase family 1 member C2 [Source:HGNC Symbol;Acc:HGNC:385]	chr10:5029591-5046215	NM_001135241, NM_001354, NM_205845	XM_011519342	.	.	NP_001128713, NP_001307956, NP_001345, NP_995317	XP_011517644, XP_016871280	protein_coding	ENSG00000151632	1646	385
AKR1C3	.	.	.	.	.	.	10.371	92.1906	15.981	166.9	159.228	166.214	182.359	174.715	136.012	145.813	163.398	170.402	aldo-keto reductase family 1 member C3 [Source:HGNC Symbol;Acc:HGNC:386]	chr10:5091003-5149878	NM_001253908, NM_003739	.	.	.	NP_001240837, NP_003730	.	protein_coding	ENSG00000196139	8644	386
AKR1C4	.	.	.	.	.	.	0	0	0	0.611977	0.667873	0.61121	0.0607292	0.227898	0.298201	0.142699	0.688514	0.535439	aldo-keto reductase family 1 member C4 [Source:HGNC Symbol;Acc:HGNC:387]	chr10:5237425-5260912	NM_001818	XM_011519303	.	.	NP_001809	.	protein_coding	ENSG00000198610	1109	387
AKR1D1	◎	.	.	◎	.	◎	0	0.0641706	0.01393	21.7004	18.228	19.0215	3.99335	3.35186	11.9357	11.6941	20.7069	22.6938	aldo-keto reductase family 1 member D1 [Source:HGNC Symbol;Acc:HGNC:388]	chr7:137761177-137802732	NM_001190906, NM_001190907, NM_005989	.	.	.	NP_001177835, NP_001177836, NP_005980	.	protein_coding	ENSG00000122787	6718	388
AKR1E2	.	.	.	.	.	.	2.17931	1.5461	0.824944	0	0	0	0.0997049	0	0	0	0	0	aldo-keto reductase family 1 member E2 [Source:HGNC Symbol;Acc:HGNC:23437]	chr10:4868445-4890254	NM_001040177, NM_001271021, NM_001271025	XM_011519728, XM_011519727	.	.	NP_001035267, NP_001257950, NP_001257954	XP_011518017, XP_011518031	protein_coding	ENSG00000165568	83592	23437
AKR7A2	.	.	.	.	.	.	83.0766	35.5803	42.2203	45.0892	46.5457	47.2233	23.0532	24.6347	36.8902	34.2725	44.6218	45.5566	aldo-keto reductase family 7 member A2 [Source:HGNC Symbol;Acc:HGNC:389]	chr1:19630458-19638640	NM_003689	.	.	.	NP_001307908, NP_003680	.	protein_coding	ENSG00000053371	8574	389
AKR7A3	.	.	.	.	.	.	1.4049	0.33048	0.436078	1.22576	0.502405	0.726841	0.412609	0.161313	0.785575	0.360006	1.52392	0.927605	aldo-keto reductase family 7 member A3 [Source:HGNC Symbol;Acc:HGNC:390]	chr1:19609051-19615744	NM_012067	.	.	.	NP_036199	.	protein_coding	ENSG00000162482	22977	390
AKT1	.	.	.	.	.	.	64.6924	41.1578	43.4803	52.6037	55.5465	52.1914	43.5208	40.1705	58.7225	54.5286	51.3836	53.8237	AKT serine/threonine kinase 1 [Source:HGNC Symbol;Acc:HGNC:391]	chr14:105235685-105262088	NM_001014431, NM_001014432, NM_005163	XM_011536543, XM_005267401	.	.	NP_001014431, NP_001014432, NP_005154	XP_005267458, XP_011534845	protein_coding	ENSG00000142208	207	391
AKT1S1	.	.	.	.	.	.	83.6907	101.919	64.8761	27.3343	24.4197	24.1183	33.7714	30.2389	24.0986	22.4374	26.8069	27.8616	AKT1 substrate 1 [Source:HGNC Symbol;Acc:HGNC:28426]	chr19:50372289-50392006	NM_001098632, NM_001098633, NM_001278159, NM_001278160, NM_032375	.	.	.	NP_001092102, NP_001092103, NP_001265088, NP_001265089, NP_115751	.	protein_coding	ENSG00000204673	84335	28426
AKT2	.	.	.	.	.	.	74.5567	40.5701	44.6222	41.3598	34.3837	39.3754	27.654	27.4069	35.7671	32.1933	41.5508	41.1689	AKT serine/threonine kinase 2 [Source:HGNC Symbol;Acc:HGNC:392]	chr19:40736223-40791302	NM_001243027, NM_001243028, NM_001626	XM_011526621, XM_011526620, XM_011526619, XM_011526618, XM_011526617, XM_011526616, XM_011526615, XM_011526614	.	.	NP_001229956, NP_001229957, NP_001617	XP_011524916, XP_011524917, XP_011524918, XP_011524919, XP_011524920, XP_011524921, XP_011524922, XP_011524923, XP_016881959, XP_016881960	protein_coding	ENSG00000105221	208	392
AKT3	.	.	.	.	.	.	2.85721	5.74708	3.93408	0.0521055	0.0627852	0.149048	0.0475688	0.0762614	0.0637358	0	0.0819686	0.0222425	AKT serine/threonine kinase 3 [Source:HGNC Symbol;Acc:HGNC:393]	chr1:243419357-244013430	NM_001206729, NM_005465, NM_181690	XM_011544011, XM_005272997, XM_005272995, XM_005272994	.	.	NP_001193658, NP_005456, NP_859029	XP_005273051, XP_005273052, XP_011542314	protein_coding	ENSG00000117020	10000	393
AKTIP	.	.	.	.	.	.	4.93194	9.43567	9.76576	13.7034	13.0336	12.7735	17.5597	18.8731	13.5744	13.7111	14.254	13.1527	AKT interacting protein [Source:HGNC Symbol;Acc:HGNC:16710]	chr16:53468331-53537163	NM_001012398, NM_001308325, NM_022476	XM_005256098, XM_005256097, XM_005256096, XM_005256095, XM_005256094	.	.	NP_001012398, NP_001295254, NP_071921	XP_005256151, XP_005256152, XP_005256153, XP_005256154, XP_005256155, XP_016879053, XP_016879054, XP_016879055	protein_coding	ENSG00000166971	64400	16710
AL021546.6	.	.	.	.	.	.	0.591518	1.71687	0.783762	4.14834e-06	1.73938e-06	1.0709	3.30502e-06	7.4894e-06	0.532803	7.18404e-05	5.177e-06	3.11968e-06	.	chr12:120875892-120907596	.	.	.	.	.	.	protein_coding	ENSG00000111780	.	.
AL021920.2	.	.	.	.	.	.	0	0	0	0	0	0	0	0	0	0	0	0	family with sequence similarity 231 member B [Source:HGNC Symbol;Acc:HGNC:49506]	chr1:17060445-17060956	.	XM_001721533	.	.	NP_001297084	XP_001721585, XP_016855477	protein_coding	ENSG00000268991	100133301	49506
AL022328.1	.	.	.	.	.	.	0	0	0	0	0	0	0	0	0	0	0	0	Uncharacterized protein [Source:UniProtKB/TrEMBL;Acc:M0QZK9]	chr22:50713407-50746056	.	.	.	.	.	.	protein_coding	ENSG00000268427	.	.
AL031320.1	.	.	.	.	.	.	0	0	0	0	0	0	0	0	0	0	0	0	.	chr6:143743968-143771810	.	.	.	.	.	.	protein_coding	ENSG00000268402	.	.
AL031590.1	.	.	.	.	.	.	0	0	0	0	0	0	0	0	0	0	0	0	.	chr22:39656864-39657063	.	.	.	.	.	.	protein_coding	ENSG00000214854	.	.
AL031663.1	.	.	.	.	.	.	0	0	0	0	0	0	0	0	0	0	0	0	Uncharacterized protein [Source:UniProtKB/TrEMBL;Acc:M0R2E6]	chr20:44095909-44110172	.	.	.	.	.	.	protein_coding	ENSG00000268111	.	.
AL035252.1	.	.	.	.	.	.	0	0	0	0	0	0	0	0	0	0	0	0	HCG2018895; Uncharacterized protein [Source:UniProtKB/TrEMBL;Acc:M0R2P0]	chr20:25176328-25207370	.	.	.	.	.	.	protein_coding	ENSG00000268302	.	.
AL035406.1	.	.	.	.	.	.	0	0	0	0	0	0	0	0	0	0	0	0	Uncharacterized protein [Source:UniProtKB/TrEMBL;Acc:M0QY64]	chr1:5922877-6161253	.	.	.	.	.	.	protein_coding	ENSG00000268332	.	.
AL035588.1	.	.	.	.	.	.	0	0	0	0	0	0	0	0	0	0	0	0	.	chr6:41651715-41703997	.	.	.	.	.	.	protein_coding	ENSG00000268275	.	.
AL035681.1	.	.	.	.	.	.	0	0	0	0	0	0	0	0	0	0	0	0	.	chr22:41685387-41685686	.	.	.	.	.	.	protein_coding	ENSG00000269104	.	.
AL049829.1	.	.	.	.	.	.	1.5014	2.48652	1.07765	1.29337	2.54268	0	0	0	1.20342	1.61198	1.31126	1.27547	Uncharacterized protein [Source:UniProtKB/TrEMBL;Acc:M0R3A9]	chr14:23775970-23795394	.	.	.	.	.	.	protein_coding	ENSG00000268702	.	.
AL049840.1	.	.	.	.	.	.	0.0216605	1.0282	0.318533	0.0740274	0.104409	0.0396274	1.03083e-83	1.28314e-136	5.29376e-36	1.79763e-09	0.0868645	0.0611903	Uncharacterized protein; cDNA FLJ53535 [Source:UniProtKB/TrEMBL;Acc:B4DK98]	chr14:104029298-104181841	.	.	.	.	.	.	protein_coding	ENSG00000224997	.	.
AL050302.1	.	.	.	.	.	.	0	0	0	0	0	0	0	0	0	0	0	0	Uncharacterized protein [Source:UniProtKB/TrEMBL;Acc:F5GZX1]	chr21:14741930-14745386	.	.	.	.	.	.	protein_coding	ENSG00000256715	.	.
AL050303.1	.	.	.	.	.	.	0	0	0	0	0	0	0	0	0	0	0	0	Uncharacterized protein; cDNA FLJ43689 fis, clone TBAES2003550 [Source:UniProtKB/TrEMBL;Acc:Q6ZUI3]	chr21:15051620-15053459	.	.	.	.	.	.	protein_coding	ENSG00000269011	.	.
AL079342.1	.	.	.	.	.	.	0	0	0	0.0197588	0.0359469	0.118223	0	0	0.0381464	0	0.0395176	0	Uncharacterized protein; cDNA FLJ27030 fis, clone SLV07741 [Source:UniProtKB/TrEMBL;Acc:Q6ZNW3]	chr6:89674245-89676685	.	.	.	.	.	.	protein_coding	ENSG00000203863	.	.
AL096677.1	.	.	.	.	.	.	0	0	0	0	0	0	0	0	0	0	0	0	.	chr20:23330014-23335414	.	.	.	.	.	.	protein_coding	ENSG00000269407	.	.
AL109659.1	.	.	.	.	.	.	0	0	0	0	0	0	0	0	0	0	0	0	HCG1780467; PRO0529; Uncharacterized protein [Source:UniProtKB/TrEMBL;Acc:Q9UI23]	chr1:48569305-48569878	.	.	.	.	.	.	protein_coding	ENSG00000269709	.	.
AL109927.1	.	.	.	.	.	.	0	1.49929	0	0	0	0	0	0	0	0	0	0	HCG2032222; PRO2047; Uncharacterized protein [Source:UniProtKB/TrEMBL;Acc:Q9UHS2]	chr1:28157288-28178187	.	.	.	.	.	.	protein_coding	ENSG00000268552	.	.
AL117190.2	.	.	.	.	.	.	1.39339	14.9746	5.28888	0	0	0	0	0	0	0	0	0	.	chr14:101295065-101295537	.	.	.	.	.	.	protein_coding	ENSG00000267918	.	.
AL117190.3	.	.	.	.	.	.	0	0	0	0	0	0	0	0	0.0756647	0	0	0	Esophagus cancer-related gene-2 interaction susceptibility protein; Uncharacterized protein [Source:UniProtKB/TrEMBL;Acc:Q8IZW4]	chr14:101359264-101360646	.	.	.	.	.	.	protein_coding	ENSG00000269375	.	.
AL118506.1	.	.	.	.	.	.	0.0968833	1.78715	0.769227	0.447342	0	0	0	0.206049	0	0	0.458168	0.436516	Uncharacterized protein [Source:UniProtKB/TrEMBL;Acc:M0R1J9]	chr20:62571181-62587768	.	.	.	.	.	.	protein_coding	ENSG00000267848	.	.
AL121895.1	.	.	.	.	.	.	0	0	0	0	0	0	0	0	0	0	0	0	Uncharacterized protein [Source:UniProtKB/TrEMBL;Acc:M0R345]	chr20:34679425-34820721	.	.	.	.	.	.	protein_coding	ENSG00000269650	.	.
AL121901.1	.	.	.	.	.	.	0	0	0	0	0	0	0	0	0	0	0	0	Nasopharyngeal carcinoma-related protein YH1; Uncharacterized protein [Source:UniProtKB/TrEMBL;Acc:Q9HBK5]	chr20:31823090-31823387	.	.	.	.	.	.	protein_coding	ENSG00000269117	.	.
AL121963.1	.	.	.	.	.	.	0	0	0	0	0	0	0	0	0	0	0	0	Uncharacterized protein [Source:UniProtKB/TrEMBL;Acc:H7C467]	chr6:116422011-116570660	.	.	.	.	.	.	protein_coding	ENSG00000234188	.	.
AL132989.1	.	.	.	.	.	.	0	0	0	0	0	0	0	0	0	0	0	0	.	chr14:58754750-58755865	.	.	.	.	.	.	protein_coding	ENSG00000268466	.	.
AL133262.1	.	.	.	.	.	.	0	0	0	0	0	0	0	0	0	0	0	0	.	chr6:44355261-44418163	.	.	.	.	.	.	protein_coding	ENSG00000267849	.	.
AL133318.1	.	.	.	.	.	.	0	0	0	0	0	0	0	0	0	0	0	0	Uncharacterized protein [Source:UniProtKB/TrEMBL;Acc:M0QYP5]	chr13:41111137-41111323	.	.	.	.	.	.	protein_coding	ENSG00000269120	.	.
AL133373.1	.	.	.	.	.	.	0	0	0	0	0	0	0	0	0	0	0	0	Uncharacterized protein [Source:UniProtKB/TrEMBL;Acc:M0R207]	chr14:92038787-92041383	.	.	.	.	.	.	protein_coding	ENSG00000268657	.	.
AL135998.1	.	.	.	.	.	.	0	0	0	0	0	0	0	0	0	0	0	0	Uncharacterized protein [Source:UniProtKB/TrEMBL;Acc:H7BYV7]	chr14:23242430-23291750	.	.	.	.	.	.	protein_coding	ENSG00000215306	.	.
AL136115.1	.	.	.	.	.	.	0	0	0	0	0.110717	0	0	0	0	0	0	0	HCG2032337; PRO1848; Uncharacterized protein [Source:UniProtKB/TrEMBL;Acc:Q9UHT5]	chr1:32372021-32385084	.	.	.	.	.	.	protein_coding	ENSG00000212673	.	.
AL136218.1	.	.	.	.	.	.	2.1759	14.7038	3.97479	2.7474	5.09628	1.37011e-48	2.1812e-142	1.08382e-85	4.03897	1.64202	4.15737	1.33744	Sarcoma antigen NY-SAR-79; Uncharacterized protein [Source:UniProtKB/TrEMBL;Acc:Q86WE6]	chr13:49882785-50069139	.	.	.	.	.	.	protein_coding	ENSG00000215462	.	.
AL136376.1	.	.	.	.	.	.	0.306073	0.251758	0.269427	0.35198	1.28825	0	0	0	0	0.847773	0.70396	0	Uncharacterized protein [Source:UniProtKB/TrEMBL;Acc:M0R1U3]	chr1:116915881-116947396	.	.	.	.	.	.	protein_coding	ENSG00000269279	.	.
AL136531.1	.	.	.	.	.	.	0	0	0	0	0	0	0	0	0.0686957	0	0	0	HCG2043693; Uncharacterized protein [Source:UniProtKB/TrEMBL;Acc:G3V1J7]	chr20:1316227-1317555	.	.	.	.	.	.	protein_coding	ENSG00000203630	.	.
AL137002.1	.	.	.	.	.	.	0	0	0	0	0	0	0	0	0	0	0	0	Uncharacterized protein [Source:UniProtKB/TrEMBL;Acc:M0R0V9]	chr13:113755562-113756608	.	.	.	.	.	.	protein_coding	ENSG00000268130	.	.
AL137026.1	.	.	.	.	.	.	0	0	0	0	0	0	0	0	0	0	0	0	Uncharacterized protein [Source:UniProtKB/TrEMBL;Acc:M0QY04]	chr10:44865612-44880545	.	.	.	.	.	.	protein_coding	ENSG00000269515	.	.
AL138815.1	.	.	.	.	.	.	0	0	0	0	0	0	0	0	0	0	0	0	Uncharacterized protein [Source:UniProtKB/TrEMBL;Acc:H7BYW3]	chr13:25946208-26599989	.	.	.	.	.	.	protein_coding	ENSG00000215549	.	.
AL138815.2	.	.	.	.	.	.	0	0	0	0	0	0	0	0	0	0	0	0	Uncharacterized protein [Source:UniProtKB/TrEMBL;Acc:O00246]	chr13:25946208-26599989	.	.	.	.	.	.	protein_coding	ENSG00000268344	.	.
AL138847.1	.	.	.	.	.	.	0	0	0	0	0.0504571	0	0	0	0	0	0	0	CDNA FLJ26506 fis, clone KDN07105; Uncharacterized protein [Source:UniProtKB/TrEMBL;Acc:Q6ZP49]	chr1:62920396-63154039	.	.	.	.	.	.	protein_coding	ENSG00000269624	.	.
AL139080.1	.	.	.	.	.	.	0	0	0	0	0	0	0	0	0	0	0	0	Uncharacterized protein [Source:UniProtKB/TrEMBL;Acc:M0R1P4]	chr13:24304327-24463558	.	.	.	.	.	.	protein_coding	ENSG00000268735	.	.
AL139333.1	.	.	.	.	.	.	0	0	0	0	0	0	0	0	0	0	0	0	.	chr6:83777384-83908651	.	.	.	.	.	.	protein_coding	ENSG00000214479	.	.
AL158091.1	.	.	.	.	.	.	0	0	0	0	0	0	0	0	0	0	0	0	Protein LOC100509861 [Source:UniProtKB/TrEMBL;Acc:M0R1Y7]	chr20:62474778-62475273	.	XM_003119827	.	.	.	XP_003119875	protein_coding	ENSG00000269223	100509861	.
AL158147.2	.	.	.	.	.	.	0	0	0	0	0	0	0	0	0	0	0	0	HCG2011465; Uncharacterized protein [Source:UniProtKB/TrEMBL;Acc:Q8WW44]	chr9:4792868-4861075	.	.	.	.	.	.	protein_coding	ENSG00000269305	.	.
AL160175.1	.	.	.	.	.	.	0	0	0	0	0	0	0	0	0	0	0	0	.	chr20:30252254-30310701	.	.	.	.	.	.	protein_coding	ENSG00000268457	.	.
AL160274.1	.	.	.	.	.	.	0	0	0	0	0	0	0	0	0	0	0	0	HCG17281; PRO0038; Uncharacterized protein [Source:UniProtKB/TrEMBL;Acc:Q9UI90]	chr9:35161988-35405335	.	.	.	.	.	.	protein_coding	ENSG00000268482	.	.
AL160286.1	.	.	.	.	.	.	0	0	0	0	0	0	0	0	0	0	0	0	Uncharacterized protein [Source:UniProtKB/TrEMBL;Acc:M0R0W5]	chr1:179334854-179545087	.	.	.	.	.	.	protein_coding	ENSG00000269064	.	.
AL161450.1	.	.	.	.	.	.	0	0	0	0	0	0	0	0	0	0	0	0	Uncharacterized protein [Source:UniProtKB/TrEMBL;Acc:M0QZJ9]	chr9:4985244-5128183	.	.	.	.	.	.	protein_coding	ENSG00000268155	.	.
AL161645.2	.	.	.	.	.	.	0	0	0	0	0	0	0	0	0	0	0	0	Uncharacterized protein [Source:UniProtKB/TrEMBL;Acc:M0QZJ1]	chr10:135333909-135352626	.	.	.	.	.	.	protein_coding	ENSG00000268925	.	.
AL161784.1	.	.	.	.	.	.	0	0	0	0	0	0	0	0	0	0	0	0	Uncharacterized protein [Source:UniProtKB/TrEMBL;Acc:M0R1V0]	chr9:124101265-124132582	.	.	.	.	.	.	protein_coding	ENSG00000267987	.	.
AL162389.1	.	.	.	.	.	.	0	0	0	0	0	0	0	0	0	0	0	0	Uncharacterized protein [Source:UniProtKB/TrEMBL;Acc:F8WER4]	chr9:110539470-110540419	.	.	.	.	.	.	protein_coding	ENSG00000214645	.	.
AL162407.1	.	.	.	.	.	.	1.49199e-06	1.72404e-07	6.86181e-07	2.95533	3.04981	3.41948	1.30589	1.01568	2.02315	1.47983	2.96041	2.95025	CDNA FLJ20147 fis, clone COL07954; HCG1781466; Uncharacterized protein [Source:UniProtKB/TrEMBL;Acc:Q9NXN1]	chr10:115614419-115676953	.	.	.	.	.	.	protein_coding	ENSG00000234631	.	.
AL162424.1	.	.	.	.	.	.	0	0	0	0	0	0	0	0	0	0	0	0	Uncharacterized protein [Source:UniProtKB/TrEMBL;Acc:M0QXR1]	chr9:125132808-125157982	.	.	.	.	.	.	protein_coding	ENSG00000269738	.	.
AL162431.1	.	.	.	.	.	.	0	0	0	0	0	0	0	0	0	0	0	0	Uncharacterized protein [Source:UniProtKB/TrEMBL;Acc:H0YFY1]	chr1:180941694-180992257	.	.	.	.	.	.	protein_coding	ENSG00000234237	.	.
AL353354.1	.	.	.	.	.	.	0	0	0	0	0	0	0	0	0	0	0	0	Uncharacterized protein [Source:UniProtKB/TrEMBL;Acc:H3BLX2]	chr1:28526788-28559536	.	.	.	.	.	.	protein_coding	ENSG00000215902	.	.
AL353354.2	.	.	.	.	.	.	0	0	0	0	0	0	0	0	0	0	0	0	.	chr1:28526788-28559536	.	.	.	.	.	.	protein_coding	ENSG00000269804	.	.
AL353583.1	.	.	.	.	.	.	0	0	0	0	0	0	0	0	0	0	0	0	.	chr10:23983674-24836777	.	.	.	.	.	.	protein_coding	ENSG00000269879	.	.
AL353608.1	.	.	.	.	.	.	0	0	0	0	0	0	0	0	0	0	0	0	HDCMB45P; Uncharacterized protein [Source:UniProtKB/TrEMBL;Acc:Q9P1R7]	chr9:70856396-70914931	.	.	.	.	.	.	protein_coding	ENSG00000228537	.	.
AL353698.1	.	.	.	.	.	.	0	0	0	0	0	0	0	0	0	0	0	0	Uncharacterized protein [Source:UniProtKB/TrEMBL;Acc:E7EML2]	chrX:56100756-56102014	.	.	.	.	.	.	protein_coding	ENSG00000233889	.	.
AL353791.1	.	.	.	.	.	.	0.0566792	0.0228931	0.125835	0.214658	0.298545	0.198506	0.47039	0.470834	0.548755	0.349679	0.111888	0.317428	.	chr9:40028619-40032417	.	.	.	.	.	.	protein_coding	ENSG00000227921	.	.
AL354718.1	.	.	.	.	.	.	0	0	0	0	0	0	0	0	0	0	0	0	Uncharacterized protein [Source:UniProtKB/TrEMBL;Acc:Q8TBT3]	chr9:45441272-45441542	.	.	.	.	.	.	protein_coding	ENSG00000268578	.	.
AL354808.2	.	.	.	.	.	.	0	0	0	0	0	0	0	0	0	0	0	0	.	chr13:20268546-20269240	.	.	.	.	.	.	protein_coding	ENSG00000269591	.	.
AL354898.1	.	.	.	.	.	.	0	0	0.0144126	0.0195279	0	0	0	0	0	0	0.0390559	0	.	chr9:133274028-133282639	.	.	.	.	.	.	protein_coding	ENSG00000215428	.	.
AL355149.2	.	.	.	.	.	.	0	0	0	0	0	0	0	0	0	0	0	0	family with sequence similarity 231 member C [Source:EntrezGene;Acc:729587]	chr1:16865560-16866070	.	.	.	.	NP_001297067	XP_006726394, XP_016858568	protein_coding	ENSG00000268674	729587, 102723383	.
AL355531.2	.	.	.	.	.	.	0	0	0	0	0	0	0	0	0	0	0	0	Uncharacterized protein [Source:UniProtKB/TrEMBL;Acc:M0R0Y1]	chr10:131265447-131566271	.	.	.	.	.	.	protein_coding	ENSG00000268421	.	.
AL356215.1	.	.	.	.	.	.	0	0	0	0	0	0	0	0	0	0	0	0	.	chr11:35150090-35150215	.	.	.	.	.	.	protein_coding	ENSG00000269766	.	.
AL356356.1	.	.	.	.	.	.	1.77554	0.241438	1.21028	0.671633	0.252001	0.324923	0.220948	0.366912	0.47302	0.267562	0.900281	0.442985	Protein LOC100996516 [Source:UniProtKB/TrEMBL;Acc:Q8WYY2]	chr1:150521844-150533413	.	.	.	.	.	.	protein_coding	ENSG00000225996	.	.
AL357673.1	.	.	.	.	.	.	0.211991	0.0371203	0.0496668	0.314897	0.269829	0.812966	0.570526	0.197279	0.323518	0.336808	0.386559	0.243236	CDNA: FLJ21031 fis, clone CAE07336; HCG1780521; Uncharacterized protein [Source:UniProtKB/TrEMBL;Acc:Q9H7D2]	chr1:54635323-54662077	.	.	.	.	.	.	protein_coding	ENSG00000248835	.	.
AL358113.1	.	.	.	.	.	.	0	0	0	0	0	0	0	0	0	0	0	0	Tight junction protein 2 (Zona occludens 2) isoform 1 variant; Uncharacterized protein [Source:UniProtKB/TrEMBL;Acc:Q59F31]	chr9:71736179-71870124	.	.	.	.	.	.	protein_coding	ENSG00000269295	.	.
AL358333.1	.	.	.	.	.	.	0	0	0	0	0	0	0	0	0	0	0	0	HCG2013195; Uncharacterized protein [Source:UniProtKB/TrEMBL;Acc:M0R394]	chr14:52292912-52436518	.	.	.	.	.	.	protein_coding	ENSG00000267802	.	.
AL358813.2	.	.	.	.	.	.	0.683	0.507834	0.41579	0.0720423	0.6709	0.57117	0.516476	0.133962	0.33735	0.340139	0	0.144085	family with sequence similarity 231, member D [Source:HGNC Symbol;Acc:49509]	chr1:149673899-149677289	.	.	.	.	.	.	protein_coding	ENSG00000203815	644634	49509
AL359091.2	.	.	.	.	.	.	0	0.0504478	0	0.0426177	0	0	0	0	0.0424353	0	0	0.0852354	CDNA: FLJ21673 fis, clone COL09042; HCG2036511; Uncharacterized protein [Source:UniProtKB/TrEMBL;Acc:Q9H6Y8]	chr9:131062366-131064212	.	.	.	.	.	.	protein_coding	ENSG00000268211	.	.
AL359195.1	.	.	.	.	.	.	0	0.00849442	0	0	0	0.0239218	0	0	0	0	0	0	Uncharacterized protein; cDNA FLJ46261 fis, clone TESTI4025062 [Source:UniProtKB/TrEMBL;Acc:Q6ZRL6]	chr10:82009465-82013395	.	.	.	.	.	.	protein_coding	ENSG00000204038	.	.
AL359693.1	.	.	.	.	.	.	0	0	0	0	0	0	0	0	0	0	0	0	.	chr6:82262306-82262537	.	.	.	.	.	.	protein_coding	ENSG00000269494	.	.
AL359736.1	.	.	.	.	.	.	0	0	0	0	0	0	0	0	0	0	0	0	protein PCOTH isoform 1 [Source:RefSeq peptide;Acc:NP_001014442]	chr13:24881303-24896673	.	.	.	.	NP_001129288, NP_001014442	.	protein_coding	ENSG00000205850	542767	.
AL360181.1	.	.	.	.	.	.	0	0	0	0	0	0	0	0	0	0	0	0	Uncharacterized protein [Source:UniProtKB/TrEMBL;Acc:M0R1D8]	chr10:135192719-135238076	.	.	.	.	.	.	protein_coding	ENSG00000268882	.	.
AL365202.1	.	.	.	.	.	.	0	0	0	0	0	0	0	0	0	0	0	0	Metazoan signal recognition particle RNA [Source:RFAM;Acc:RF00017]	chr9:3218296-3526001	.	.	.	.	.	.	misc_RNA	ENSG00000203286	.	.
AL390778.1	.	.	.	.	.	.	0	0	0	0	0	0	0	0	0	0	0	0	Uncharacterized protein [Source:UniProtKB/TrEMBL;Acc:M0QYD9]	chr9:138150511-138151275	.	.	.	.	.	.	protein_coding	ENSG00000269408	.	.
AL391152.1	.	.	.	.	.	.	0	0	0	0	0	0	0	0	0	0	0	0	.	chr14:57667224-57765460	.	.	.	.	.	.	protein_coding	ENSG00000212928	.	.
AL441883.1	.	.	.	.	.	.	1.31446	1.5838	0.874362	0.851538	1.8426	1.31649	2.18805	2.33529	1.46016	1.15713	0.498396	1.20468	Uncharacterized protein [Source:UniProtKB/TrEMBL;Acc:M0R2E0]	chr6:13615558-13621437	.	.	.	.	.	.	protein_coding	ENSG00000268059	.	.
AL445665.1	◎	.	.	◎	.	◎	0	0	0	0.0912141	0.78521	0.378396	3.05255	3.54686	0.988685	1.68674	0	0.182428	.	chr9:69650262-69660358	.	.	.	.	.	.	transcribed_unprocessed_pseudogene	ENSG00000176134	.	.
AL513478.1	.	.	.	.	.	.	0	0	0	0	0	0	0	0	0	0	0	0	Uncharacterized protein [Source:UniProtKB/TrEMBL;Acc:M0R309]	chr9:43135094-43135514	.	.	.	.	.	.	protein_coding	ENSG00000232866	.	.
AL583828.1	.	.	.	.	.	.	0.137648	0.00456899	0.131689	0.294796	1.25538e-14	1.37564e-37	7.81557e-56	0.226124	0.0110748	0.926871	2.12174e-13	0.589592	.	chr6:13358061-13487894	.	.	.	.	.	.	protein_coding	ENSG00000187461	.	.
AL589739.1	.	.	.	.	.	.	0	0.106678	0	0	0	0	0	0	0	0	0	0	Uncharacterized protein [Source:UniProtKB/TrEMBL;Acc:M0QY59]	chr1:2252691-2323146	.	.	.	.	.	.	protein_coding	ENSG00000269753	.	.
AL589765.1	.	.	.	.	.	.	1.53841e-08	0	2.81873e-09	0	2.09762e-18	0	0	0	0	0	0	0	Uncharacterized protein; cDNA FLJ36032 fis, clone TESTI2017069 [Source:UniProtKB/TrEMBL;Acc:Q8N9Z1]	chr1:151674879-151702082	.	.	.	.	.	.	protein_coding	ENSG00000240510	.	.
AL590235.1	.	.	.	.	.	.	2.24754e-07	0	0	0	0	1.49664e-06	0	0	0	0	0	0	Uncharacterized protein [Source:UniProtKB/TrEMBL;Acc:M0QXW5]	chr4:3508102-3534286	.	.	.	.	.	.	protein_coding	ENSG00000268781	.	.
AL590452.1	.	.	.	.	.	.	0.14544	0.301369	0.0419658	0.0253512	0	0.0514016	0.0499887	0.0473435	0	0.115617	0.0507025	0	Uncharacterized protein [Source:UniProtKB/TrEMBL;Acc:M0QZ77]	chr1:144851423-145076186	.	.	.	.	.	.	protein_coding	ENSG00000268172	.	.
AL590483.1	.	.	.	.	.	.	0	0	0	0	0	0	0	0	0	0	0	0	Uncharacterized protein; cDNA FLJ42623 fis, clone BRACE3015894 [Source:UniProtKB/TrEMBL;Acc:Q6ZVG0]	chr1:244227631-244231211	.	.	.	.	.	.	protein_coding	ENSG00000268146	.	.
AL590560.1	.	.	.	.	.	.	0	0	0	0	0	0	0	0	0	0	0	0	HCG1995379; Uncharacterized protein [Source:UniProtKB/TrEMBL;Acc:M0R2Y0]	chr1:159879883-159880159	.	.	.	.	.	.	protein_coding	ENSG00000269620	.	.
AL590714.1	.	.	.	.	.	.	0	0	0	0	2.0776	0	2.02024	0	2.07036	0	0	0	Uncharacterized protein [Source:UniProtKB/TrEMBL;Acc:M0R2L1]	chr1:161185068-161193421	.	.	.	.	.	.	protein_coding	ENSG00000268387	.	.
AL590822.1	.	.	.	.	.	.	0.0173377	0.0182433	0.0334521	0	0	0.0449276	0	0	0	0	0	0	Uncharacterized protein [Source:UniProtKB/TrEMBL;Acc:F5H5L2]	chr1:2143359-2145620	.	.	.	.	.	.	protein_coding	ENSG00000203301	.	.
AL590822.2	.	.	.	.	.	.	0.909158	0.297207	0.156552	0.184881	0.300439	0.105983	0.316696	0.480569	0.100668	0.129987	0.265515	0.104247	Uncharacterized protein; cDNA FLJ36608 fis, clone TRACH2015824 [Source:UniProtKB/TrEMBL;Acc:Q8N9S5]	chr1:2004900-2126214	.	.	.	.	.	.	protein_coding	ENSG00000269554	.	.
AL591025.1	.	.	.	.	.	.	0	0	0	0	0	0	0	0	0	0	0	0	Uncharacterized protein [Source:UniProtKB/TrEMBL;Acc:H7BYS0]	chr6:158957467-159056460	.	.	.	.	.	.	protein_coding	ENSG00000214239	.	.
AL591479.1	.	.	.	.	.	.	0.309609	0.13273	0.250351	0.274053	0.30011	0.488754	0.276936	0	0.265465	0.144227	0.236229	0.311876	Uncharacterized protein [Source:UniProtKB/TrEMBL;Acc:M0R1G5]	chr9:70646588-70648956	.	.	.	.	.	.	protein_coding	ENSG00000269337	.	.
AL591684.1	.	.	.	.	.	.	0.0617651	0.081409	0.13986	0	0	0	0	0	0	0	0	0	Protein LOC100996760 [Source:UniProtKB/TrEMBL;Acc:A6NLY1]	chr10:48255203-48279200	.	.	.	.	.	.	protein_coding	ENSG00000215020	100996760	.
AL591806.1	.	.	.	.	.	.	0	0	0	0	0	0	0	0	0	0	0	0	Metazoan signal recognition particle RNA [Source:RFAM;Acc:RF00017]	chr1:161016737-161039760	.	.	.	.	.	.	misc_RNA	ENSG00000268154	.	.
AL592284.1	.	.	.	.	.	.	0.141362	0.0404545	0.0452824	0.05962	0.115416	0	0	0	0	0	0	0.11924	Protein LOC642441 [Source:UniProtKB/TrEMBL;Acc:F5H305]	chr1:144339737-144521058	.	.	.	.	.	XP_005273044, XP_001134398	protein_coding	ENSG00000231360	730256	.
AL596220.1	.	.	.	.	.	.	0	0	0	0	0	0	0	0	0	0	0	0	Uncharacterized protein [Source:UniProtKB/TrEMBL;Acc:M0R1Z0]	chr1:186344969-186390510	.	.	.	.	.	.	protein_coding	ENSG00000268662	.	.
AL603965.1	.	.	.	.	.	.	1.61036	1.22269	2.93142	0	0	0	0	0	0	0	0	0	Protein LOC100996760 [Source:UniProtKB/TrEMBL;Acc:A6NF06]	chr10:47746935-47770871	.	XM_003846495, XM_005276385	.	.	.	XP_005276442, XP_003846543	protein_coding	ENSG00000215033	100996760	.
AL606500.1	.	.	.	.	.	.	0	0	0	0	0	0	0	0	0	0	0	0	.	chr1:154554537-154600440	.	.	.	.	.	.	protein_coding	ENSG00000268141	.	.
AL626787.1	.	.	.	.	.	.	0	0	0	0.176456	0.0822969	0.0452388	0	0.083866	0	0.0529906	0.0914502	0.261462	.	chr1:166026678-166028709	.	.	.	.	.	.	protein_coding	ENSG00000267884	.	.
AL627171.1	.	.	.	.	.	.	0	0	0	0	0	0	0	0	0	0	0	0	Uncharacterized protein [Source:UniProtKB/TrEMBL;Acc:H7BY28]	chr14:50234325-50319921	.	.	.	.	.	.	protein_coding	ENSG00000197502	.	.
AL627171.2	.	.	.	.	.	.	0	0	0	0	0	0	0	0	0	0	0	0	HCG1786899; PRO2610; Uncharacterized protein [Source:UniProtKB/TrEMBL;Acc:Q9P160]	chr14:50234325-50319921	.	.	.	.	.	.	protein_coding	ENSG00000269832	.	.
AL627309.1	.	.	.	.	.	.	8.01669	10.1857	5.58446	0.714378	0.873139	0.798158	0.693196	0.558927	0.378268	0.853109	0.569215	0.859541	Uncharacterized protein [Source:UniProtKB/TrEMBL;Acc:R4GN28]	chr1:134900-139379	.	.	.	.	.	XP_005277993, XP_005272761, XP_003960327, XP_003403763, XP_003119205	protein_coding	ENSG00000237683	728728	.
AL645608.1	.	.	.	.	.	.	0	0	0	0	0	0	0	0	0	0	0	0	Uncharacterized protein [Source:UniProtKB/TrEMBL;Acc:M0R0C9]	chr1:861117-894670	.	.	.	.	.	.	protein_coding	ENSG00000268179	.	.
AL645608.2	.	.	.	.	.	.	0	0	0	0	0	0	0	0	0	0	0	0	.	chr1:818042-819983	.	.	.	.	.	.	protein_coding	ENSG00000269308	.	.
AL645730.2	.	.	.	.	.	.	0	0	0	0	0	0	0	0	0	0	0	0	.	chr1:48998526-50489585	.	.	.	.	.	.	protein_coding	ENSG00000227839	.	.
AL645922.1	.	.	.	.	.	.	0	0	0	0	0	0	0	0	0	0	0	0	Uncharacterized protein [Source:UniProtKB/TrEMBL;Acc:M0R2J5]	chr6:31973944-31974881	.	.	.	.	.	.	protein_coding	ENSG00000268923	.	.
AL646016.1	.	.	.	.	.	.	0	0	0	0	0	0	0	0	0	0	0	0	Uncharacterized protein [Source:UniProtKB/TrEMBL;Acc:M0R2V9]	chr1:240255179-240643504	.	.	.	.	.	.	protein_coding	ENSG00000268365	.	.
AL669831.1	.	.	.	.	.	.	0	0	0	0	0	0	0	0	0	0	0	0	Uncharacterized protein [Source:UniProtKB/TrEMBL;Acc:M0QX24]	chr1:738531-739137	.	.	.	.	.	.	protein_coding	ENSG00000269831	.	.
AL929472.1	.	.	.	.	.	.	0	0	0	0	0	0	0	0	0	0	0	0	.	chr1:38275238-38325292	.	.	.	.	.	.	protein_coding	ENSG00000230610	.	.
AL953854.2	.	.	.	.	.	.	0	0	0	0	0	0	0	0	0	0	0	0	.	chr9:47295878-47314322	.	.	.	.	.	.	protein_coding	ENSG00000236029	.	.
ALAD	◎	.	.	◎	.	◎	7.49637	6.00727	6.54897	30.4213	20.6296	20.6571	7.33192	7.00651	16.0222	14.9525	29.1902	31.6524	aminolevulinate dehydratase [Source:HGNC Symbol;Acc:HGNC:395]	chr9:116148596-116163613	NM_000031	XM_011518364, XM_011518363, XM_005251799	.	.	NP_000022, NP_001304674	XP_011516666	protein_coding	ENSG00000148218	210	395
ALAS1	.	.	.	.	.	.	33.0933	81.958	28.8691	18.0315	14.0073	13.0914	15.7751	15.7586	11.2609	11.6921	18.3977	17.6652	5'-aminolevulinate synthase 1 [Source:HGNC Symbol;Acc:HGNC:396]	chr3:52232101-52248343	NM_000688, NM_001304443, NM_001304444, NM_199166	XM_011533478, XM_011533477	.	.	NP_000679, NP_001291372, NP_001291373, NP_954635	XP_011531779, XP_011531780	protein_coding	ENSG00000023330	211	396
ALAS2	.	.	.	.	.	.	0	0	0	0	0	0	0	0	0	0	0	0	5'-aminolevulinate synthase 2 [Source:HGNC Symbol;Acc:HGNC:397]	chrX:55026789-55057497	NM_000032, NM_001037967, NM_001037968	XM_011530771, XM_005261995	.	.	NP_000023, NP_001033056, NP_001033057	XP_005262052, XP_011529073, XP_016884843	protein_coding	ENSG00000158578	212	397
ALB	◎	.	.	◎	.	◎	0.0435796	0.0482669	0.0423131	9127.27	8320.45	8834.52	2595.26	2470.71	5677.22	5925.68	9091.96	9162.57	albumin [Source:HGNC Symbol;Acc:HGNC:399]	chr4:74269955-74287129	NM_000477	.	.	.	NP_000468	.	protein_coding	ENSG00000163631	213	399
ALCAM	.	.	.	.	.	.	30.6161	47.0047	76.5923	15.8635	14.9537	15.5228	12.4179	13.6185	14.1551	14.7581	15.9448	15.7822	activated leukocyte cell adhesion molecule [Source:HGNC Symbol;Acc:HGNC:400]	chr3:105085752-105295744	NM_001243280, NM_001243281, NM_001627	.	.	.	NP_001230209, NP_001230210, NP_001618	.	protein_coding	ENSG00000170017	214	400
ALDH16A1	.	.	.	.	.	.	47.9197	20.7169	17.0065	17.6706	22.0437	18.3684	16.162	15.9824	18.5469	17.5161	18.2777	17.0635	aldehyde dehydrogenase 16 family member A1 [Source:HGNC Symbol;Acc:HGNC:28114]	chr19:49949555-49974305	NM_001145396, NM_153329	XM_011526442, XM_011526441	.	.	NP_001138868, NP_699160	XP_011524743, XP_011524744	protein_coding	ENSG00000161618	126133	28114
ALDH18A1	.	.	.	.	.	.	53.4727	22.4036	25.0141	82.3574	112.861	118.628	64.7133	63.909	104.809	112.725	81.5723	83.1426	aldehyde dehydrogenase 18 family member A1 [Source:HGNC Symbol;Acc:HGNC:9722]	chr10:97365685-97416463	NM_001017423, NM_001323414, NM_002860	XM_011540001, XM_006717933	.	.	NP_001017423, NP_001310342, NP_001310343, NP_001310344, NP_002851	XP_006717996	protein_coding	ENSG00000059573	5832	9722
ALDH1A1	◎	.	.	.	.	◎	0.029345	0.0938227	0.0461908	255.213	157.349	167.767	68.7134	63.8751	113.943	118.991	254.125	256.301	aldehyde dehydrogenase 1 family member A1 [Source:HGNC Symbol;Acc:HGNC:402]	chr9:75515577-75567972	NM_000689	.	.	.	NP_000680	.	protein_coding	ENSG00000165092	216	402
ALDH1A2	.	.	.	.	.	.	0.669056	3.11036	1.89553	0	0	0.0252649	0.117162	0	0.0239831	0	0	0	aldehyde dehydrogenase 1 family member A2 [Source:HGNC Symbol;Acc:HGNC:15472]	chr15:58245621-58571462	NM_001206897, NM_003888, NM_170696, NM_170697	.	.	.	NP_001193826, NP_003879, NP_733797, NP_733798	.	protein_coding	ENSG00000128918	8854	15472
ALDH1A3	.	.	.	.	.	.	57.8738	33.0482	75.5512	0.0277797	0	0	0	0.0265398	0	0	0	0.0555593	aldehyde dehydrogenase 1 family member A3 [Source:HGNC Symbol;Acc:HGNC:409]	chr15:101419580-101456831	NM_000693, NM_001293815	.	.	.	NP_000684, NP_001280744	.	protein_coding	ENSG00000184254	220	409
ALDH1B1	.	.	.	.	.	.	30.8496	8.23248	15.0541	52.8975	44.0092	45.7336	23.3383	24.3308	37.9607	36.4688	53.4779	52.3171	aldehyde dehydrogenase 1 family member B1 [Source:HGNC Symbol;Acc:HGNC:407]	chr9:38392660-38398658	NM_000692	XM_011517802	.	.	NP_000683	XP_011516104	protein_coding	ENSG00000137124	219	407
ALDH1L1	◎	.	◎	.	.	◎	0.0627422	0.010446	0.00994742	11.2476	4.1261	4.65851	2.20212	1.89854	3.00935	2.94881	10.8412	11.654	aldehyde dehydrogenase 1 family member L1 [Source:HGNC Symbol;Acc:HGNC:3978]	chr3:125822404-125900029	NM_001270364, NM_001270365, NM_012190	XM_011512356, XM_011512355, XM_006713481	.	.	NP_001257293, NP_001257294, NP_036322	XP_006713544, XP_011510657	protein_coding	ENSG00000144908	10840	3978
ALDH1L2	◎	◎	.	.	.	◎	3.20108	2.68857	1.93595	1.78501	2.15079	2.21482	8.02035	8.80435	5.03969	4.83089	1.64598	1.92404	aldehyde dehydrogenase 1 family member L2 [Source:HGNC Symbol;Acc:HGNC:26777]	chr12:105380087-105478355	NM_001034173	XM_017018889, XM_011537987, XM_011537986	.	.	NP_001029345	XP_011536288, XP_016874378	protein_coding	ENSG00000136010	160428	26777
ALDH2	.	.	.	.	.	.	27.7679	98.9157	28.4834	64.6561	60.1907	58.2686	31.9104	30.709	54.859	48.5988	66.7149	62.5974	aldehyde dehydrogenase 2 family (mitochondrial) [Source:HGNC Symbol;Acc:HGNC:404]	chr12:112123874-112255333	NM_000690, NM_001204889	.	.	.	NP_000681, NP_001191818	.	protein_coding	ENSG00000111275	217	404
ALDH3A1	.	.	.	.	.	.	0.134411	0.115244	0.052134	0.727889	0.203301	0.152769	0.0920759	0	0.0956716	0.0599647	0.887116	0.568663	aldehyde dehydrogenase 3 family member A1 [Source:HGNC Symbol;Acc:HGNC:405]	chr17:19641296-19651746	NM_000691, NM_001135167, NM_001135168	XM_011523731, XM_011523730, XM_005256524, XM_005256523, XM_005256522	.	.	NP_000682, NP_001128639, NP_001128640	XP_005256579, XP_005256580, XP_005256581, XP_011522032, XP_011522033	protein_coding	ENSG00000108602	218	405
ALDH3A2	.	.	.	.	.	.	29.6338	44.463	32.7689	56.282	41.7374	38.857	29.9037	26.5675	32.591	36.2099	57.6888	54.8752	aldehyde dehydrogenase 3 family member A2 [Source:HGNC Symbol;Acc:HGNC:403]	chr17:19551838-19580911	NM_000382, NM_001031806	XM_017024357, XM_017024356, XM_011523733, XM_011523732	.	.	NP_000373, NP_001026976	XP_011522034, XP_011522035, XP_016879845, XP_016879846	protein_coding	ENSG00000072210	224	403
ALDH3B1	◎	.	.	◎	.	◎	11.4974	3.42482	2.46388	6.96988	5.33656	4.54432	1.20229	1.62626	3.35534	3.39563	6.79144	7.14832	aldehyde dehydrogenase 3 family member B1 [Source:HGNC Symbol;Acc:HGNC:410]	chr11:67776047-67796743	NM_000694, NM_001030010, NM_001161473, NM_001290058, NM_001290059	.	.	.	NP_000685, NP_001025181, NP_001154945, NP_001276987, NP_001276988	.	protein_coding	ENSG00000006534	221	410
ALDH3B2	.	.	.	.	.	.	1.74085	0.0827247	0.266789	0.0166888	0	0	0	0	0	0	0.0333776	0	aldehyde dehydrogenase 3 family member B2 [Source:HGNC Symbol;Acc:HGNC:411]	chr11:67429632-67448671	NM_000695, NM_001031615	XM_011544851	.	.	NP_000686, NP_001026786	.	protein_coding	ENSG00000132746	222	411
ALDH4A1	.	.	.	.	.	.	10.6689	2.84088	4.69052	38.3464	65.3965	61.8704	40.6915	39.9876	60.1909	56.633	38.9829	37.7098	aldehyde dehydrogenase 4 family member A1 [Source:HGNC Symbol;Acc:HGNC:406]	chr1:19197923-19229275	NM_001161504, NM_001319218, NM_003748, NM_170726	XM_011542352	.	.	NP_001154976, NP_001306147, NP_003739, NP_733844	XP_011540654	protein_coding	ENSG00000159423	8659	406
ALDH5A1	.	.	.	.	.	.	4.60364	2.52266	3.40617	25.1721	20.2987	19.566	10.781	10.5969	17.5578	18.6898	24.7745	25.5697	aldehyde dehydrogenase 5 family member A1 [Source:HGNC Symbol;Acc:HGNC:408]	chr6:24495079-24537435	NM_001080, NM_170740	.	.	.	NP_001071, NP_733936	.	protein_coding	ENSG00000112294	7915	408
ALDH6A1	◎	.	◎	◎	.	◎	1.863	0.955426	0.87245	17.8538	8.78224	8.77709	1.80873	1.57323	5.96506	5.99853	18.1622	17.5454	aldehyde dehydrogenase 6 family member A1 [Source:HGNC Symbol;Acc:HGNC:7179]	chr14:74486058-74551196	NM_001278593, NM_001278594, NM_005589	.	.	.	NP_001265522, NP_001265523, NP_005580	.	protein_coding	ENSG00000119711	4329	7179
ALDH7A1	◎	.	.	◎	.	◎	55.5184	15.1894	40.7239	47.4716	47.6292	45.455	16.4667	18.4874	36.8705	37.3064	48.2401	46.7032	aldehyde dehydrogenase 7 family member A1 [Source:HGNC Symbol;Acc:HGNC:877]	chr5:125866891-125931110	NM_001182, NM_001201377, NM_001202404	XM_011543417	.	.	NP_001173, NP_001188306, NP_001189333	XP_011541719	protein_coding	ENSG00000164904	501	877
ALDH8A1	.	.	.	.	.	.	0.0130663	0.110302	0.073641	0.15929	0.258351	0.230687	0.0704541	0.0823097	0.102316	0.124693	0.284503	0.034077	aldehyde dehydrogenase 8 family member A1 [Source:HGNC Symbol;Acc:HGNC:15471]	chr6:135238527-135271260	NM_001193480, NM_022568, NM_170771	XM_006715551	.	.	NP_001180409, NP_072090, NP_739577	.	protein_coding	ENSG00000118514	64577	15471
ALDH9A1	.	.	.	.	.	.	23.6334	34.4993	27.6354	18.475	18.8306	19.1327	11.5661	12.3906	17.1945	15.8137	18.3815	18.5686	aldehyde dehydrogenase 9 family member A1 [Source:HGNC Symbol;Acc:HGNC:412]	chr1:165631452-165668100	NM_000696	XM_011509294	.	.	NP_000687	XP_011507596	protein_coding	ENSG00000143149	223	412
ALDOA	.	.	.	.	.	.	1777.83	1344.31	1424.32	594.626	1006.57	940.071	702.79	742.729	850.405	808.727	599.45	589.801	aldolase, fructose-bisphosphate A [Source:HGNC Symbol;Acc:HGNC:414]	chr16:30064410-30081741	NM_000034, NM_001127617, NM_001243177, NM_184041, NM_184043	XM_011545768, XM_011545767	.	.	NP_000025, NP_001121089, NP_001230106, NP_908930, NP_908932	XP_011544069, XP_011544070	protein_coding	ENSG00000149925	226	414
ALDOB	.	.	.	.	.	.	0	0	0	0.525638	0.179041	0.373415	0.0600959	0.0635502	0.241629	0.287393	0.549753	0.501524	aldolase, fructose-bisphosphate B [Source:HGNC Symbol;Acc:HGNC:417]	chr9:104182859-104198105	NM_000035	.	.	.	NP_000026	.	protein_coding	ENSG00000136872	229	417
ALDOC	◎	◎	.	◎	.	◎	33.4019	11.8724	16.6466	19.0584	27.8854	25.0212	2.92771	2.91999	7.36216	8.19799	19.5063	18.6105	aldolase, fructose-bisphosphate C [Source:HGNC Symbol;Acc:HGNC:418]	chr17:26900132-26904282	NM_005165	XM_011524556, XM_005257949	.	.	NP_005156	XP_005258006, XP_011522858	protein_coding	ENSG00000109107	230	418
ALG1	.	.	.	.	.	.	34.0703	16.0982	26.3791	31.7367	44.1546	45.2172	35.172	37.0209	44.3253	45.8168	32.1229	31.3505	ALG1, chitobiosyldiphosphodolichol beta-mannosyltransferase [Source:HGNC Symbol;Acc:HGNC:18294]	chr16:5083960-5147809	NM_019109	XM_011522565	.	.	NP_061982	XP_011520867, XP_016878946, XP_016878947	protein_coding	ENSG00000033011	56052	18294
ALG10	.	.	.	.	.	.	3.50109	4.3808	3.36354	2.54892	4.52368	4.16008	2.36026	3.14553	4.3769	4.94745	2.47686	2.62098	ALG10, alpha-1,2-glucosyltransferase [Source:HGNC Symbol;Acc:HGNC:23162]	chr12:34175215-34182629	NM_032834	.	.	.	NP_116223	.	protein_coding	ENSG00000139133	84920	23162
ALG10B	.	.	.	.	.	.	3.68267	2.49749	3.92613	2.27061	2.30004	2.62603	1.5132	2.70582	4.10629	3.96988	1.89436	2.64685	ALG10B, alpha-1,2-glucosyltransferase [Source:HGNC Symbol;Acc:HGNC:31088]	chr12:38710379-38723530	NM_001013620, NM_001308340	XM_011537948, XM_005268665	.	.	NP_001013642, NP_001295269	XP_005268722, XP_011536250	protein_coding	ENSG00000175548	144245	31088
ALG11	.	.	.	.	.	.	3.91764	7.94199	6.3192	9.16125	11.6295	11.4711	19.0358	20.586	13.2114	13.2105	9.5217	8.8008	ALG11, alpha-1,2-mannosyltransferase [Source:HGNC Symbol;Acc:HGNC:32456]	chr13:52586533-52607736	NM_001004127	.	.	.	NP_001004127	.	protein_coding	ENSG00000253710	440138	32456
ALG12	.	.	.	.	.	.	7.66191	4.92544	4.11136	3.80216	3.16019	2.82661	3.10365	3.49874	2.92342	3.26403	3.98793	3.61639	ALG12, alpha-1,6-mannosyltransferase [Source:HGNC Symbol;Acc:HGNC:19358]	chr22:50293876-50312106	NM_024105	XM_011530371	.	.	NP_077010	XP_011528673	protein_coding	ENSG00000182858	79087	19358
ALG13	.	.	.	.	.	.	13.1481	23.7579	19.6944	12.5739	14.5864	14.9351	23.7248	18.7662	21.0847	21.6933	11.745	13.4027	ALG13, UDP-N-acetylglucosaminyltransferase subunit [Source:HGNC Symbol;Acc:HGNC:30881]	chrX:110924345-111003877	NM_001039210, NM_001099922, NM_001168385, NM_001257230, NM_001257231, NM_001257234, NM_001257235, NM_001257237, NM_001257239, NM_001257240, NM_001324292, NM_018466	XM_011531035, XM_011531034, XM_011531033, XM_011531032, XM_011531031, XM_011531030, XM_011531029, XM_011531028, XM_006724698, XM_006724697, XM_006724695, XM_006724693, XM_005262191	.	.	NP_001034299, NP_001093392, NP_001161857, NP_001244159, NP_001244160, NP_001244163, NP_001244164, NP_001244166, NP_001244168, NP_001244169, NP_001311219, NP_001311220, NP_001311221, NP_001311223, NP_060936	XP_005262248, XP_006724756, XP_006724760, XP_006724761, XP_011529330, XP_011529332, XP_011529333, XP_011529334, XP_011529335, XP_011529336, XP_016885335, XP_016885336, XP_016885337	protein_coding	ENSG00000101901	79868	30881
ALG14	.	.	.	.	.	.	0.76197	1.19547	0.784104	1.76009	1.89333	2.17474	2.47792	2.19965	1.97417	1.90369	1.69933	1.82085	ALG14, UDP-N-acetylglucosaminyltransferase subunit [Source:HGNC Symbol;Acc:HGNC:28287]	chr1:95439962-95538501	NM_144988	.	.	.	NP_659425	.	protein_coding	ENSG00000172339	199857	28287
ALG1L	.	.	.	.	.	.	6.81287	2.88087	3.95591	0.625602	0	0.150999	0	0.277356	0	0	0.80999	0.441214	ALG1, chitobiosyldiphosphodolichol beta-mannosyltransferase like [Source:HGNC Symbol;Acc:HGNC:33721]	chr3:125648117-125655882	NM_001015050, NM_001195223	.	.	.	NP_001015050, NP_001182152	XP_016861333, XP_016861334, XP_016861335, XP_016861336	protein_coding	ENSG00000189366	200810	33721
ALG1L2	.	.	.	.	.	.	0	0.0383283	0.0368234	0.194038	0.0893304	0	0	0	0	0.115622	0.388077	0	ALG1, chitobiosyldiphosphodolichol beta-mannosyltransferase like 2 [Source:HGNC Symbol;Acc:HGNC:37258]	chr3:129800673-129817233	NM_001136152	XM_011513075	.	.	NP_001129624	.	protein_coding	ENSG00000251287	644974	37258
ALG2	◎	.	.	.	.	◎	19.2071	30.7776	23.3852	33.0606	36.292	32.7777	82.3457	79.4125	42.6933	45.6513	31.204	34.9171	ALG2, alpha-1,3/1,6-mannosyltransferase [Source:HGNC Symbol;Acc:HGNC:23159]	chr9:101979648-101984238	NM_033087	.	.	.	NP_149078	.	protein_coding	ENSG00000119523	85365	23159
ALG3	.	.	.	.	.	.	64.0438	37.3238	47.3881	39.6567	51.1103	53.3715	65.2433	61.817	54.6694	53.1581	39.0935	40.2198	ALG3, alpha-1,3- mannosyltransferase [Source:HGNC Symbol;Acc:HGNC:23056]	chr3:183960121-183967336	NM_001006941, NM_005787	XM_011512323	.	.	NP_001006942, NP_005778	XP_011510624, XP_011510625	protein_coding	ENSG00000214160	10195	23056
ALG5	.	.	.	.	.	.	19.6508	23.1666	25.6086	23.6084	29.6384	34.9525	41.559	40.1673	30.9147	31.341	24.9934	22.2234	ALG5, dolichyl-phosphate beta-glucosyltransferase [Source:HGNC Symbol;Acc:HGNC:20266]	chr13:37523911-37573504	NM_001142364, NM_013338	XM_005266362	.	.	NP_001135836, NP_037470	.	protein_coding	ENSG00000120697	29880	20266
ALG6	.	.	.	.	.	.	3.34515	3.24953	2.84196	4.63004	5.07597	4.91387	4.73942	4.16766	5.61752	4.57072	4.80831	4.45176	ALG6, alpha-1,3-glucosyltransferase [Source:HGNC Symbol;Acc:HGNC:23157]	chr1:63833260-63904233	NM_013339	.	.	.	NP_037471	.	protein_coding	ENSG00000088035	29929	23157
ALG8	.	.	.	.	.	.	44.2552	43.3876	59.3668	31.8886	44.913	47.3579	33.2864	36.8712	44.7791	41.6096	33.5451	30.232	ALG8, alpha-1,3-glucosyltransferase [Source:HGNC Symbol;Acc:HGNC:23161]	chr11:77811987-77850706	NM_001007027, NM_024079	XM_011545252, XM_011545251, XM_005274247	.	.	NP_001007028, NP_076984	XP_005274304, XP_011543554, XP_016873763	protein_coding	ENSG00000159063	79053	23161
ALG9	.	.	.	.	.	.	12.6802	13.5497	12.6389	16.4147	17.1747	17.1513	16.9135	19.2204	17.2694	18.0094	16.1793	16.65	ALG9, alpha-1,2-mannosyltransferase [Source:HGNC Symbol;Acc:HGNC:15672]	chr11:111656979-111756699	NM_001077690, NM_001077691, NM_001077692, NM_024740	XM_011542995, XM_011542992, XM_011542991, XM_011542990, XM_006718913, XM_005277724, XM_005277723	.	.	NP_001071158, NP_001071159, NP_001071160, NP_079016	XP_005277780, XP_005277781, XP_006718976, XP_011541294, XP_016873802, XP_016873805, XP_016873806, XP_016873807, XP_016873808, XP_016873809, XP_016873810, XP_016873811, XP_016873812, XP_016873813, XP_016873814	protein_coding	ENSG00000086848	79796	15672
ALK	.	.	.	.	.	.	0.0137825	0.0278458	0.00476534	0	0	0	0	0	0	0	0	0	anaplastic lymphoma receptor tyrosine kinase [Source:HGNC Symbol;Acc:HGNC:427]	chr2:29415639-30144432	NM_004304	.	.	.	NP_004295	.	protein_coding	ENSG00000171094	238	427
ALKBH1	.	.	.	.	.	.	9.1787	12.198	9.73125	5.06133	5.86128	5.81233	8.60841	7.52638	6.29669	6.38704	5.40273	4.71994	alkB homolog 1, histone H2A dioxygenase [Source:HGNC Symbol;Acc:HGNC:17911]	chr14:78138746-78174363	NM_006020	.	.	.	NP_006011	.	protein_coding	ENSG00000100601	8846	17911
ALKBH2	.	.	.	.	.	.	43.2495	23.9749	22.4857	14.2087	18.9469	18.7961	15.8444	16.5303	15.2102	17.7555	14.5542	13.8631	alkB homolog 2, alpha-ketoglutarate dependent dioxygenase [Source:HGNC Symbol;Acc:HGNC:32487]	chr12:109525992-109531293	NM_001001655, NM_001145374, NM_001145375, NM_001205179, NM_001205180	XM_005253836, XM_005253835	.	.	NP_001001655, NP_001138846, NP_001138847, NP_001192108, NP_001192109	XP_005253892, XP_005253893	protein_coding	ENSG00000189046	121642	32487
ALKBH3	.	.	.	.	.	.	12.3726	10.6104	8.40323	9.15074	9.30548	9.74781	11.2265	11.7248	10.5192	8.98922	9.19112	9.11036	alkB homolog 3, alpha-ketoglutaratedependent dioxygenase [Source:HGNC Symbol;Acc:HGNC:30141]	chr11:43902388-43941762	NM_139178	.	.	.	NP_631917	.	protein_coding	ENSG00000166199	221120	30141
ALKBH4	.	.	.	.	.	.	14.9173	9.88493	7.78545	4.25302	3.85078	3.81203	2.70902	3.28842	3.39287	3.60088	4.20004	4.306	alkB homolog 4, lysine demethylase [Source:HGNC Symbol;Acc:HGNC:21900]	chr7:102073976-102105323	NM_017621	XM_005250465, XM_005250464	.	.	NP_060091	XP_005250521, XP_005250522	protein_coding	ENSG00000160993	54784	21900
ALKBH5	.	.	.	.	.	.	61.3927	69.0004	61.3417	34.7575	37.6383	36.8265	38.1948	42.4369	37.675	42.829	34.1372	35.3779	alkB homolog 5, RNA demethylase [Source:HGNC Symbol;Acc:HGNC:25996]	chr17:18086391-18113268	NM_017758	.	.	.	NP_060228	.	protein_coding	ENSG00000091542	54890	25996
ALKBH6	.	.	.	.	.	.	24.4223	27.0841	11.1745	6.87864	5.63543	6.63593	3.4521	2.88132	4.32788	2.59128	6.84121	6.91607	alkB homolog 6 [Source:HGNC Symbol;Acc:HGNC:28243]	chr19:36500025-36505141	NM_001297701, NM_032878, NM_198867	XM_005259359, XM_005259357	.	.	NP_001284630, NP_116267, NP_942567	XP_005259414	protein_coding	ENSG00000239382	84964	28243
ALKBH7	.	.	.	.	.	.	47.4783	31.6353	28.503	42.9595	43.7727	40.8695	38.1907	27.7614	37.8899	33.5082	40.2141	45.705	alkB homolog 7 [Source:HGNC Symbol;Acc:HGNC:21306]	chr19:6372443-6379069	NM_032306	.	.	.	NP_115682	.	protein_coding	ENSG00000125652	84266	21306
ALKBH8	.	.	.	.	.	.	3.85455	5.16332	3.9564	2.56253	3.39938	3.27218	3.81259	3.80606	2.92724	3.22571	2.63509	2.48998	alkB homolog 8, tRNA methyltransferase [Source:HGNC Symbol;Acc:HGNC:25189]	chr11:107373451-107436472	NM_001301010, NM_138775	XM_005271729, XM_005271728	.	.	NP_001287939, NP_620130	XP_005271785, XP_005271786	protein_coding	ENSG00000137760	91801	25189
ALLC	.	.	.	.	.	.	0	0	0.0203439	0.320423	0.198986	0.166195	0	0.397876	0.104179	0	0.325209	0.315638	allantoicase [Source:HGNC Symbol;Acc:HGNC:17377]	chr2:3705784-3750261	NM_018436	XM_011510370	.	.	NP_060906	XP_011508672	protein_coding	ENSG00000151360	55821	17377
ALMS1	.	.	.	.	.	.	1.75971	2.45157	1.48284	2.96592	3.37249	3.14252	3.32784	3.57201	3.36264	3.37285	3.09277	2.83907	ALMS1, centrosome and basal body associated protein [Source:HGNC Symbol;Acc:HGNC:428]	chr2:73612885-73837046	NM_015120	.	.	.	NP_055935	.	protein_coding	ENSG00000116127	7840	428
ALOX12	.	.	.	.	.	.	11.529	2.4669	6.3252	0	0	0.0350732	0	0	0	0	0	0	arachidonate 12-lipoxygenase, 12S type [Source:HGNC Symbol;Acc:HGNC:429]	chr17:6899383-6914055	NM_000697	XM_011523780	.	.	NP_000688	XP_011522082	protein_coding	ENSG00000108839	239	429
ALOX12B	.	.	.	.	.	.	0.137374	0.0792935	0.0911758	0.0346605	0.0332326	0	0.0709444	0.0971621	0.067616	0	0	0.069321	arachidonate 12-lipoxygenase, 12R type [Source:HGNC Symbol;Acc:HGNC:430]	chr17:7975953-7991021	NM_001139	.	.	.	NP_001130	.	protein_coding	ENSG00000179477	242	430
ALOX15	.	.	.	.	.	.	0.594881	0.198792	0.732542	0.0863238	0	0.0655337	0.0741054	0	0.0355532	0.0805333	0.0744035	0.0982442	arachidonate 15-lipoxygenase [Source:HGNC Symbol;Acc:HGNC:433]	chr17:4534196-4545589	NM_001140	.	.	.	NP_001131	.	protein_coding	ENSG00000161905	246	433
ALOX15B	.	.	.	.	.	.	2.31538	1.34064	1.84921	0	0	0	0	0	0	0	0	0	arachidonate 15-lipoxygenase, type B [Source:HGNC Symbol;Acc:HGNC:434]	chr17:7942334-7952452	NM_001039130, NM_001039131, NM_001141	.	.	.	NP_001034219, NP_001034220, NP_001132	.	protein_coding	ENSG00000179593	247	434
ALOX5	.	.	.	.	.	.	0.770826	0.228224	0.929247	0.0211138	0	0	0	0	0	0.040651	0	0.0422277	arachidonate 5-lipoxygenase [Source:HGNC Symbol;Acc:HGNC:435]	chr10:45869623-45941567	NM_000698, NM_001256153, NM_001256154	XM_011539564	.	.	NP_000689, NP_001243082, NP_001243083	.	protein_coding	ENSG00000012779	240	435
ALOX5AP	.	.	.	.	.	.	0.143394	0.329002	0.870286	0.66002	0.774876	0.486127	0.118402	0	0.695785	0.141785	0.971704	0.348336	arachidonate 5-lipoxygenase activating protein [Source:HGNC Symbol;Acc:HGNC:436]	chr13:31287614-31338563	NM_001204406, NM_001629	.	.	.	NP_001191335, NP_001620	.	protein_coding	ENSG00000132965	241	436
ALOXE3	.	.	.	.	.	.	1.20418	6.19643	2.07145	0.0138406	0.0256984	0.0276488	0.205206	0.212806	0	0	0.0276812	0	arachidonate lipoxygenase 3 [Source:HGNC Symbol;Acc:HGNC:13743]	chr17:7999217-8022365	NM_001165960, NM_021628	.	.	.	NP_001159432, NP_067641	.	protein_coding	ENSG00000179148	59344	13743
ALPI	.	.	.	.	.	.	0	0	0	0.0165729	0.0311162	0	0.131717	0.120959	0.0315053	0	0.0331459	0	alkaline phosphatase, intestinal [Source:HGNC Symbol;Acc:HGNC:437]	chr2:233320832-233324742	NM_001631	.	.	.	NP_001622	.	protein_coding	ENSG00000163295	248	437
ALPK1	.	.	.	.	.	.	1.97996	1.00979	1.13223	0.345957	0.181725	0.281533	0.241402	0.33442	0.20485	0.229321	0.392933	0.298981	alpha kinase 1 [Source:HGNC Symbol;Acc:HGNC:20917]	chr4:113218498-113363762	NM_001102406, NM_001253884, NM_025144	XM_011532283, XM_011532282, XM_011532281, XM_011532280, XM_006714326, XM_005263248, XM_005263247, XM_005263246, XM_005263245	.	.	NP_001095876, NP_001240813, NP_079420	XP_005263302, XP_005263303, XP_006714389, XP_016864122, XP_016864123, XP_016864124, XP_016864125, XP_016864126, XP_016864127, XP_016864128, XP_016864129, XP_016864130, XP_016864131, XP_016864132, XP_016864133, XP_016864134, XP_016864136, XP_016864137	protein_coding	ENSG00000073331	80216	20917
ALPK2	.	.	.	.	.	.	0.0107292	0.0260758	0.047019	2.28548	3.28583	3.33451	4.46323	3.94239	3.78799	4.02227	2.51324	2.05773	alpha kinase 2 [Source:HGNC Symbol;Acc:HGNC:20565]	chr18:56148478-56296189	NM_052947	XM_011525802, XM_011525801	.	.	NP_443179	XP_011524103, XP_011524104, XP_016881024, XP_016881025, XP_016881026	protein_coding	ENSG00000198796	115701	20565
ALPK3	.	.	.	.	.	.	0.0914478	0.0883763	0.119834	0.0587919	0.0324275	0.0423535	0.138462	0.107962	0.0602679	0.0580088	0.063058	0.0545257	alpha kinase 3 [Source:HGNC Symbol;Acc:HGNC:17574]	chr15:85359910-85416713	NM_020778	XM_017022444	.	.	NP_065829	XP_016877933	protein_coding	ENSG00000136383	57538	17574
ALPL	.	.	.	.	.	.	0.277368	0.220783	0.140115	0	0.0339997	0.0367868	0.0677517	0.0662681	0.103551	0	0	0	alkaline phosphatase, liver/bone/kidney [Source:HGNC Symbol;Acc:HGNC:438]	chr1:21835864-21904905	NM_000478, NM_001127501, NM_001177520	XM_006710546, XM_005245818	.	.	NP_000469, NP_001120973, NP_001170991	XP_005245875, XP_006710609, XP_016856392	protein_coding	ENSG00000162551	249	438
ALPP	.	.	.	.	.	.	17.9136	12.7952	73.4844	0	0	0	0	0	0	0	0	0	alkaline phosphatase, placental [Source:HGNC Symbol;Acc:HGNC:439]	chr2:233243243-233247599	NM_001632	.	.	.	NP_001623	.	protein_coding	ENSG00000163283	250	439
ALPPL2	.	.	.	.	.	.	0.362457	0.158141	0.471099	0.0353946	0	0	0	0	0	0	0.0707892	0	alkaline phosphatase, placental like 2 [Source:HGNC Symbol;Acc:HGNC:441]	chr2:233271552-233275424	NM_031313	.	.	.	NP_112603	.	protein_coding	ENSG00000163286	251	441
ALS2	.	.	.	.	.	.	6.41108	19.355	10.9126	9.86296	9.18261	9.06852	11.7923	11.6284	8.09152	8.7901	10.193	9.53293	ALS2, alsin Rho guanine nucleotide exchange factor [Source:HGNC Symbol;Acc:HGNC:443]	chr2:202565276-202645912	NM_001135745, NM_020919	XM_017004569, XM_011511530, XM_006712654, XM_005246709	.	.	NP_001129217, NP_065970	XP_006712717, XP_011509832, XP_016860058	protein_coding	ENSG00000003393	57679	443
ALS2CL	.	.	.	.	.	.	6.17999	6.4511	6.88122	0	0	0	0	0	0	0	0	0	ALS2 C-terminal like [Source:HGNC Symbol;Acc:HGNC:20605]	chr3:46710678-46735191	NM_001190707, NM_147129, NM_182775	.	.	.	NP_001177636, NP_667340, NP_877576	XP_006713156	protein_coding	ENSG00000178038	259173	20605
ALS2CR11	.	.	.	.	.	.	0.0191783	0.0217898	0	0	0	0.0136626	0	0	0	0	0	0	amyotrophic lateral sclerosis 2 chromosome region candidate 11 [Source:HGNC Symbol;Acc:HGNC:14438]	chr2:202352147-202483901	NM_001168216, NM_001168217, NM_001168221, NM_152525	XM_011510736, XM_006712336, XM_006712335, XM_006712334, XM_006712333, XM_006712332, XM_006712331, XM_005246347	.	.	NP_001161688, NP_001161689, NP_001161693, NP_689738	XP_006712394, XP_006712395, XP_006712396, XP_006712397, XP_006712398, XP_006712399, XP_011509038	protein_coding	ENSG00000155754	151254	14438
ALS2CR12	.	.	.	.	.	.	0.0139222	0.060353	0.0441079	0.156297	0.102659	0.232177	0.150589	0.206532	0.0368511	0.0432927	0.152735	0.15986	amyotrophic lateral sclerosis 2 chromosome region candidate 12 [Source:HGNC Symbol;Acc:HGNC:14439]	chr2:202152993-202222121	NM_001127391, NM_001289993, NM_139163	XM_011510611, XM_011510610, XM_011510609, XM_011510608, XM_011510607, XM_011510606	NR_110620	.	NP_001120863, NP_001276922, NP_631902	XP_011508908, XP_011508912, XP_016858849	protein_coding	ENSG00000155749	130540	14439
ALX1	.	.	.	.	.	.	2.2697	2.47159	2.32021	0	0	0	0	0	0	0	0	0	ALX homeobox 1 [Source:HGNC Symbol;Acc:HGNC:1494]	chr12:85673884-85695562	NM_006982	XM_005269165	.	.	NP_008913	XP_005269222	protein_coding	ENSG00000180318	8092	1494
ALX3	.	.	.	.	.	.	0	0.0357491	0	0	0.048835	0	0	0	0	0.0624436	0	0	ALX homeobox 3 [Source:HGNC Symbol;Acc:HGNC:449]	chr1:110602615-110613322	NM_006492	.	.	.	NP_006483	.	protein_coding	ENSG00000156150	257	449
ALX4	.	.	.	.	.	.	0	0	0.00571217	0	0.0140659	0	0	0	0	0	0	0	ALX homeobox 4 [Source:HGNC Symbol;Acc:HGNC:450]	chr11:44281993-44331716	NM_021926	.	.	.	NP_068745	.	protein_coding	ENSG00000052850	60529	450
ALYREF	.	.	.	.	.	.	161.789	101.381	122.9	60.2576	74.8678	70.9966	85.0888	78.4059	76.8637	72.0331	58.9804	61.5347	Aly/REF export factor [Source:HGNC Symbol;Acc:HGNC:19071]	chr17:79845719-79869340	NM_005782	.	.	.	NP_005773	.	protein_coding	ENSG00000183684	10189	19071
AMACR	◎	.	.	◎	.	◎	4.06562	1.97557	2.30573	19.3738	12.3838	17.2172	4.79842	4.72565	10.4934	10.0011	18.4172	20.3303	alpha-methylacyl-CoA racemase [Source:HGNC Symbol;Acc:HGNC:451]	chr5:33986282-34008213	NM_001167595, NM_014324, NM_203382	.	.	.	NP_001161067, NP_055139, NP_976316	.	protein_coding	ENSG00000242110	23600	451
AMBN	.	.	.	.	.	.	0	0	0	0	0	0	0	0	0	0	0	0	ameloblastin [Source:HGNC Symbol;Acc:HGNC:452]	chr4:71457972-71473005	NM_016519	.	.	.	NP_057603	.	protein_coding	ENSG00000178522	258	452
AMBP	.	.	.	.	.	.	0	0.468643	0	1242.9	1257.95	1288.74	786.945	743.068	1078.62	1099.24	1232.4	1253.4	alpha-1-microglobulin/bikunin precursor [Source:HGNC Symbol;Acc:HGNC:453]	chr9:116822406-116840752	NM_001633	.	.	.	NP_001624	.	protein_coding	ENSG00000106927	259	453
AMBRA1	.	.	.	.	.	.	11.8339	12.0978	8.59198	9.38672	8.14173	7.89481	8.52623	8.10539	8.1584	7.38277	9.27718	9.49626	autophagy and beclin 1 regulator 1 [Source:HGNC Symbol;Acc:HGNC:25990]	chr11:46417963-46615595	NM_001267782, NM_001267783, NM_001300731, NM_017749	XM_006718260, XM_006718259, XM_005253014, XM_005253011, XM_005253009	.	.	NP_001254711, NP_001254712, NP_001287660, NP_060219	XP_005253066, XP_005253068, XP_005253071, XP_006718322, XP_006718323	protein_coding	ENSG00000110497	55626	25990
AMD1	.	.	.	.	.	.	44.1528	44.7287	63.2568	53.2088	88.4155	89.7409	81.2842	77.5679	87.1388	94.774	54.4413	51.9764	adenosylmethionine decarboxylase 1 [Source:HGNC Symbol;Acc:HGNC:457]	chr6:111195972-111216916	NM_001287214, NM_001287215, NM_001287216, NM_001634	.	.	.	NP_001274143, NP_001274144, NP_001274145, NP_001625	.	protein_coding	ENSG00000123505	262	457
AMDHD1	◎	.	◎	◎	.	◎	0.171481	0.251379	0.185063	5.72934	11.4125	12.1905	4.53604	4.33192	9.72886	9.77958	5.99163	5.46705	amidohydrolase domain containing 1 [Source:HGNC Symbol;Acc:HGNC:28577]	chr12:96337070-96362494	NM_152435	.	.	.	NP_689648	.	protein_coding	ENSG00000139344	144193	28577
AMDHD2	◎	.	.	◎	.	◎	28.6702	7.42121	15.4669	24.1729	19.8427	20.8205	7.47171	6.78979	15.3112	15.4426	24.5501	23.7957	amidohydrolase domain containing 2 [Source:HGNC Symbol;Acc:HGNC:24262]	chr16:2525051-2581423	NM_001145815, NM_015944	XM_017023267	.	.	NP_001139287, NP_057028	XP_016878751, XP_016878753, XP_016878756	protein_coding	ENSG00000162066	51005	24262
AMELX	.	.	.	.	.	.	0	0	0	0	0	0	0	0	0	0	0	0	amelogenin, X-linked [Source:HGNC Symbol;Acc:HGNC:461]	chrX:11155662-11683821	NM_001142, NM_182680, NM_182681	XM_011545489	.	.	NP_001133, NP_872621, NP_872622	XP_011543791, XP_016884893	protein_coding	ENSG00000125363	265	461
AMELY	.	.	.	.	.	.	0	0	0	0	0	0	0	0	0	0	0	0	amelogenin, Y-linked [Source:HGNC Symbol;Acc:HGNC:462]	chrY:6733958-6742068	NM_001143	XM_011531472	.	.	NP_001134	XP_011529774, XP_016885531	protein_coding	ENSG00000099721	266	462
AMER1	.	.	.	.	.	.	3.91241	0.804897	2.27331	5.62567	4.42512	4.4588	2.18684	2.29095	3.61994	4.42034	5.66308	5.58826	APC membrane recruitment protein 1 [Source:HGNC Symbol;Acc:HGNC:26837]	chrX:63404996-63425624	NM_152424	XM_011530858	.	.	NP_689637	XP_011529160	protein_coding	ENSG00000184675	139285	26837
AMER2	.	.	.	.	.	.	0	0	0	0	0	0	0	0	0	0	0	0	APC membrane recruitment protein 2 [Source:HGNC Symbol;Acc:HGNC:26360]	chr13:25735821-25746426	NM_152704, NM_199138	XM_006719770, XM_005266280, XM_005266279	.	.	NP_689917, NP_954589	XP_005266336, XP_005266337, XP_006719833, XP_016875904	protein_coding	ENSG00000165566	219287	26360
AMER3	.	.	.	.	.	.	0	0	0	0	0	0	0	0	0	0	0	0	APC membrane recruitment protein 3 [Source:HGNC Symbol;Acc:HGNC:26771]	chr2:131513007-131525707	NM_001105193, NM_001105194, NM_001105195, NM_152698	XM_011510793	.	.	NP_001098663, NP_001098664, NP_001098665, NP_689911	XP_011509095	protein_coding	ENSG00000178171	205147	26771
AMFR	.	.	.	.	.	.	30.1502	36.3004	44.4352	43.0368	36.6197	35.128	38.4463	38.4862	35.8073	35.6487	42.3346	43.7391	autocrine motility factor receptor [Source:HGNC Symbol;Acc:HGNC:463]	chr16:56395363-56459450	NM_001144	XM_005255890, XM_005255889	.	.	NP_001135	XP_005255947	protein_coding	ENSG00000159461	267	463
AMH	.	.	.	.	.	.	0.515777	0.6808	0.549508	0.0878121	0	0.181442	0	0.0814491	0	0.226443	0.175624	0	anti-Mullerian hormone [Source:HGNC Symbol;Acc:HGNC:464]	chr19:2249309-2252072	NM_000479	.	NR_036207	.	NP_000470	.	protein_coding	ENSG00000104899	100423031	464
AMHR2	◎	.	.	.	.	◎	0	0.0174933	0	1.57081	1.07124	1.0641	0.375993	0.135372	0.79972	0.854665	1.26288	1.87873	anti-Mullerian hormone receptor type 2 [Source:HGNC Symbol;Acc:HGNC:465]	chr12:53817638-53825318	NM_001164690, NM_001164691, NM_020547	XM_011538184, XM_011538183, XM_011538181, XM_011538180, XM_011538179, XM_011538178, XM_011538177, XM_011538176, XM_011538175, XM_011538174, XM_011538173	.	.	NP_001158162, NP_001158163, NP_065434	XP_011536475, XP_011536476, XP_011536478, XP_011536480, XP_011536481, XP_011536482, XP_011536483, XP_011536485, XP_011536486	protein_coding	ENSG00000135409	269	465
AMIGO1	.	.	.	.	.	.	1.432	0.696752	0.770564	1.01018	0.781646	0.853103	0.630879	0.664885	0.789212	0.985584	0.938689	1.08166	adhesion molecule with Ig like domain 1 [Source:HGNC Symbol;Acc:HGNC:20824]	chr1:110046796-110052360	NM_020703	XM_011541812	.	.	NP_065754	XP_011540114	protein_coding	ENSG00000181754	57463	20824
AMIGO2	.	.	.	.	.	.	11.5479	8.43828	39.1078	0	0.0283766	0.0315547	0	0	0	0.0364546	0	0	adhesion molecule with Ig like domain 2 [Source:HGNC Symbol;Acc:HGNC:24073]	chr12:47469489-47630445	NM_001143668, NM_181847	XM_005268837	.	.	NP_001137140, NP_862830	XP_005268894	protein_coding	ENSG00000139211	347902	24073
AMIGO3	.	.	.	.	.	.	0.417256	9.2327e-06	0.0270769	0.123516	0.000157945	3.83894e-06	8.7364e-05	0.000722331	0.00013446	1.41758e-10	3.83202e-05	0.246994	adhesion molecule with Ig like domain 3 [Source:HGNC Symbol;Acc:HGNC:24075]	chr3:49726931-49761384	NM_198722	.	.	.	NP_942015	.	protein_coding	ENSG00000176020	386724	24075
AMMECR1	.	.	.	.	.	.	5.44743	8.58171	5.89834	2.58888	3.23965	3.32671	3.17386	4.0276	3.28374	3.7139	2.65853	2.51923	Alport syndrome, mental retardation, midface hypoplasia and elliptocytosis chromosomal region gene 1 [Source:HGNC Symbol;Acc:HGNC:467]	chrX:109437413-109699562	NM_001025580, NM_001171689, NM_015365	.	.	.	NP_001020751, NP_001165160, NP_056180	.	protein_coding	ENSG00000101935	9949	467
AMMECR1L	.	.	.	.	.	.	12.3348	15.8938	14.6968	10.1081	10.1329	9.54809	14.879	15.691	11.2874	10.8404	10.1877	10.0284	AMMECR1 like [Source:HGNC Symbol;Acc:HGNC:28658]	chr2:128619203-128643496	NM_001199140, NM_031445	XM_011511952, XM_011511951, XM_005263807, XM_005263804	.	.	NP_001186069, NP_113633	XP_005263861, XP_005263864, XP_011510254	protein_coding	ENSG00000144233	83607	28658
AMN	◎	.	.	.	.	◎	2.97468	1.18153	1.89097	61.6126	42.7643	42.4123	17.0468	15.1344	30.8828	32.1867	63.7408	59.4844	amnion associated transmembrane protein [Source:HGNC Symbol;Acc:HGNC:14604]	chr14:103388992-103397529	NM_030943	XM_011537203, XM_011537202	.	.	NP_112205	XP_011535504, XP_011535505	protein_coding	ENSG00000166126	81693	14604
AMN1	◎	.	.	◎	.	◎	2.43541	6.25583	7.91337	4.77536	5.04212	5.52618	10.4585	11.9787	5.46068	4.82326	5.42794	4.12278	antagonist of mitotic exit network 1 homolog [Source:HGNC Symbol;Acc:HGNC:27281]	chr12:31800093-31882108	NM_001113402, NM_001278411, NM_001278412	.	.	.	NP_001106873, NP_001265340, NP_001265341	XP_016874452, XP_016874453, XP_016874454	protein_coding	ENSG00000151743	196394	27281
AMOT	.	.	.	.	.	.	0.734599	0.231142	1.44081	1.10966	0.539189	0.656342	0.0495098	0.0575099	0.411547	0.376466	1.1312	1.08812	angiomotin [Source:HGNC Symbol;Acc:HGNC:17810]	chrX:112017730-112084043	NM_001113490, NM_133265	XM_011530875, XM_005262090, XM_005262088, XM_005262087	NR_036255	.	NP_001106962, NP_573572	XP_005262144, XP_005262145, XP_005262147, XP_011529177, XP_016884778	protein_coding	ENSG00000126016	100423009	17810
AMOTL1	.	.	.	.	.	.	29.0708	35.2673	39.9189	0	0	0.0088259	0.0172804	0.0239925	0.016597	0.0101576	0	0	angiomotin like 1 [Source:HGNC Symbol;Acc:HGNC:17811]	chr11:94501507-94609918	NM_001301007, NM_130847	XM_011542627, XM_011542626, XM_005273801, XM_005273798	.	.	NP_001287936, NP_570899	XP_005273855, XP_005273858, XP_011540928	protein_coding	ENSG00000166025	154810	17811
AMOTL2	.	.	.	.	.	.	34.0443	56.8041	51.6414	6.13182	10.2956	10.6137	7.51862	6.94972	10.4646	10.0984	5.7506	6.51305	angiomotin like 2 [Source:HGNC Symbol;Acc:HGNC:17812]	chr3:134074715-134094321	NM_001278683, NM_001278685, NM_016201	XM_017006582, XM_017006581, XM_017006580, XM_011512881, XM_006713654	.	.	NP_001265612, NP_001265614, NP_057285	XP_006713717, XP_011511183, XP_016862069, XP_016862070, XP_016862071	protein_coding	ENSG00000114019	51421	17812
AMPD1	.	.	.	.	.	.	0	0	0.0250453	0	0	0	0	0	0	0	0	0	adenosine monophosphate deaminase 1 [Source:HGNC Symbol;Acc:HGNC:468]	chr1:115215718-115238239	NM_000036, NM_001172626	.	.	.	NP_000027, NP_001166097	.	protein_coding	ENSG00000116748	270	468
AMPD2	.	.	.	.	.	.	21.3615	18.8525	29.3547	36.0232	33.5832	35.0936	31.4699	33.0194	33.4376	34.8589	35.6236	36.4229	adenosine monophosphate deaminase 2 [Source:HGNC Symbol;Acc:HGNC:469]	chr1:110162458-110174673	NM_001257360, NM_001257361, NM_001308170, NM_004037, NM_139156, NM_203404	XM_011541247, XM_005270752	.	.	NP_001244289, NP_001244290, NP_001295099, NP_004028, NP_631895, NP_981949	XP_005270809	protein_coding	ENSG00000116337	271	469
AMPD3	◎	.	.	◎	.	◎	6.37038	15.8751	6.45586	0.0332986	0.167462	0.207439	1.54777	1.52693	0.285926	0.239626	0.0226713	0.043926	adenosine monophosphate deaminase 3 [Source:HGNC Symbol;Acc:HGNC:470]	chr11:10471867-10529126	NM_000480, NM_001025389, NM_001025390, NM_001172430, NM_001172431	.	.	.	NP_000471, NP_001020560, NP_001020561, NP_001165901, NP_001165902	.	protein_coding	ENSG00000133805	272	470
AMPH	.	.	.	.	.	.	0	0.00989912	0.0183998	0	0	0	0	0	0	0	0	0	amphiphysin [Source:HGNC Symbol;Acc:HGNC:471]	chr7:38423304-38671167	NM_001635, NM_139316	XM_011515271, XM_006715690, XM_006715689	.	.	NP_001626, NP_647477	XP_006715752, XP_006715753, XP_011513573	protein_coding	ENSG00000078053	273	471
AMT	◎	.	.	◎	.	◎	1.31387	0.528842	0.411168	23.1052	17.7847	20.6017	5.51049	6.82103	15.8043	14.592	24.3561	21.8542	aminomethyltransferase [Source:HGNC Symbol;Acc:HGNC:473]	chr3:49454207-49466759	NM_000481, NM_001164710, NM_001164711, NM_001164712	.	.	.	NP_000472, NP_001158182, NP_001158183, NP_001158184	.	protein_coding	ENSG00000145020	275	473
AMTN	.	.	.	.	.	.	0.164623	0	0.0766579	0	0.106955	0	0	0	0	0	0	0	amelotin [Source:HGNC Symbol;Acc:HGNC:33188]	chr4:71384256-71398459	NM_001286731, NM_212557	.	.	.	NP_001273660, NP_997722	.	protein_coding	ENSG00000187689	401138	33188
AMY1A	.	.	.	.	.	.	0	0	0	0	0	0	0	0	0	0	0	0	amylase, alpha 1A (salivary) [Source:HGNC Symbol;Acc:HGNC:474]	chr1:104198376-104207176	NM_001008221, NM_004038	.	.	.	NP_001008222, NP_004029	.	protein_coding	ENSG00000237763	276	474
AMY1B	.	.	.	.	.	.	0	0	0	0	0	0	0	0	0	0	0	0	amylase, alpha 1B (salivary) [Source:HGNC Symbol;Acc:HGNC:475]	chr1:104230036-104239076	NM_001008218	XM_017001058, XM_011541262	.	.	NP_001008219	XP_011539564, XP_016856547	protein_coding	ENSG00000174876	278	475
AMY1C	.	.	.	.	.	.	0	0	0	0	0	0	0	0	0	0	0	0	amylase, alpha 1C (salivary) [Source:HGNC Symbol;Acc:HGNC:476]	chr1:104293027-104301312	NM_001008219	XM_011541263	.	.	NP_001008220	XP_011539565	protein_coding	ENSG00000187733	278	476
AMY2A	.	.	.	.	.	.	0	0	0	0	0	0	0	0	0	0	0	0	amylase, alpha 2A (pancreatic) [Source:HGNC Symbol;Acc:HGNC:477]	chr1:104159432-104168402	NM_000699	.	.	.	NP_000690	.	protein_coding	ENSG00000243480	279	477
AMY2B	.	.	.	.	.	.	0.116154	0.0320422	0.0145279	0.535346	0.621504	0.482829	0.0471863	0.0881662	0.328565	0.551002	0.515974	0.554717	amylase, alpha 2B (pancreatic) [Source:HGNC Symbol;Acc:HGNC:478]	chr1:104068312-104122152	NM_020978	.	.	.	NP_066188	.	protein_coding	ENSG00000240038	280	478
AMZ1	.	.	.	.	.	.	3.32111	2.61621	3.31474	0	0	0	0.222667	0.25203	0.0295193	0	0	0	archaelysin family metallopeptidase 1 [Source:HGNC Symbol;Acc:HGNC:22231]	chr7:2719155-2756163	NM_001284355, NM_133463	XM_011515150	.	.	NP_001271284, NP_597720	XP_011513452	protein_coding	ENSG00000174945	155185	22231
AMZ2	.	.	.	.	.	.	53.342	38.8121	24.9225	41.993	34.7098	36.8104	29.3884	27.4835	30.2124	33.6868	42.3552	41.6308	archaelysin family metallopeptidase 2 [Source:HGNC Symbol;Acc:HGNC:28041]	chr17:66243714-66253305	NM_001033569, NM_001033570, NM_001033571, NM_001033572, NM_001033574, NM_001289054, NM_001289056, NM_016627	XM_017024727, XM_017024726, XM_017024724, XM_006721940, XM_005257437, XM_005257436, XM_005257435, XM_005257433, XM_005257432	.	.	NP_001028741, NP_001028742, NP_001028743, NP_001028744, NP_001028746, NP_001275983, NP_001275985, NP_057711	XP_005257489, XP_005257490, XP_005257492, XP_005257493, XP_005257494, XP_006722003, XP_016880212, XP_016880213, XP_016880215, XP_016880216	protein_coding	ENSG00000196704	51321	28041
ANAPC1	.	.	.	.	.	.	15.6688	11.2275	18.1833	20.1343	24.0032	25.1342	21.5151	22.0267	24.3631	26.2519	20.2367	20.032	anaphase promoting complex subunit 1 [Source:HGNC Symbol;Acc:HGNC:19988]	chr2:112525213-112642267	NM_022662	XM_011511635, XM_011511634, XM_011511633	.	.	NP_073153	XP_011509935, XP_011509936, XP_016860199, XP_016860200, XP_016860201, XP_016860202, XP_016860203	protein_coding	ENSG00000153107	64682	19988
ANAPC10	.	.	.	.	.	.	11.553	20.3197	14.5367	9.4892	12.255	11.0098	16.1924	17.8348	10.978	13.6864	9.89017	9.08823	anaphase promoting complex subunit 10 [Source:HGNC Symbol;Acc:HGNC:24077]	chr4:145915726-146050331	NM_001256706, NM_001256707, NM_001256708, NM_001256709, NM_014885	XM_011531530, XM_011531524, XM_011531521	.	.	NP_001243635, NP_001243636, NP_001243637, NP_001243638, NP_055700	XP_011529826, XP_011529832, XP_016863129	protein_coding	ENSG00000164162	10393	24077
ANAPC11	.	.	.	.	.	.	105.56	81.3983	97.9659	96.0628	119.525	107.528	95.2298	80.6748	100.543	96.0101	97.3783	94.7474	anaphase promoting complex subunit 11 [Source:HGNC Symbol;Acc:HGNC:14452]	chr17:79845719-79869340	NM_001002244, NM_001002245, NM_001002246, NM_001002247, NM_001002248, NM_001002249, NM_001289414, NM_001289415, NM_001289416, NM_001289417, NM_001289418, NM_001289419, NM_016476	.	.	.	NP_001002244, NP_001002245, NP_001002246, NP_001002247, NP_001002248, NP_001002249, NP_001276343, NP_001276344, NP_001276345, NP_001276346, NP_001276347, NP_001276348, NP_057560	.	protein_coding	ENSG00000141552	51529	14452
ANAPC13	.	.	.	.	.	.	25.2674	29.8283	34.329	39.9417	43.7018	43.19	58.9554	57.4531	40.2127	42.5568	39.4527	40.4307	anaphase promoting complex subunit 13 [Source:HGNC Symbol;Acc:HGNC:24540]	chr3:134196547-134293853	NM_001242374, NM_001242375, NM_015391	.	.	.	NP_001229303, NP_001229304, NP_056206	.	protein_coding	ENSG00000129055	25847	24540
ANAPC15	.	.	.	.	.	.	46.7562	17.5979	29.8825	10.2971	11.4266	9.45877	6.91859	7.1799	8.75369	8.28089	9.74826	10.8459	anaphase promoting complex subunit 15 [Source:HGNC Symbol;Acc:HGNC:24531]	chr11:71709586-71823826	NM_001278485, NM_001278486, NM_001278487, NM_001278488, NM_001278489, NM_001278490, NM_001278491, NM_001278492, NM_001278493, NM_001278494, NM_014042	.	.	.	NP_001265414, NP_001265415, NP_001265416, NP_001265417, NP_001265418, NP_001265419, NP_001265420, NP_001265421, NP_001265422, NP_001265423, NP_054761	XP_016872977, XP_016872978, XP_016872979, XP_016872980, XP_016872981, XP_016872982, XP_016872983, XP_016872985, XP_016872986	protein_coding	ENSG00000110200	25906	24531
ANAPC16	.	.	.	.	.	.	28.6948	17.8679	25.8391	22.1019	22.7585	23.0279	17.2277	17.3753	20.3674	20.145	21.8537	22.35	anaphase promoting complex subunit 16 [Source:HGNC Symbol;Acc:HGNC:26976]	chr10:73855789-73995618	NM_001242546, NM_001242547, NM_001242548, NM_173473	.	.	.	NP_001229475, NP_001229476, NP_001229477, NP_775744	.	protein_coding	ENSG00000166295	119504	26976
ANAPC2	.	.	.	.	.	.	30.7818	24.5788	24.5366	14.4798	11.9424	11.9488	9.88945	10.1727	11.7289	10.715	13.6651	15.2945	anaphase promoting complex subunit 2 [Source:HGNC Symbol;Acc:HGNC:19989]	chr9:140069235-140082989	NM_013366	.	.	.	NP_037498	.	protein_coding	ENSG00000176248	29882	19989
ANAPC4	.	.	.	.	.	.	5.0536	4.40614	4.64665	9.39581	8.84484	8.73517	7.82781	7.78269	8.94143	9.68012	9.97806	8.81355	anaphase promoting complex subunit 4 [Source:HGNC Symbol;Acc:HGNC:19990]	chr4:25378834-25420120	NM_001286756, NM_013367	XM_017008138, XM_011513839, XM_011513838	.	.	NP_001273685, NP_037499	XP_011512140, XP_011512141, XP_016863627	protein_coding	ENSG00000053900	29945	19990
ANAPC5	.	.	.	.	.	.	100.624	65.8687	85.7081	69.093	76.3872	73.7517	71.3411	67.046	73.9032	77.4048	68.8789	69.3072	anaphase promoting complex subunit 5 [Source:HGNC Symbol;Acc:HGNC:15713]	chr12:121746159-121790265	NM_001137559, NM_016237	XM_006719449, XM_005253900	.	.	NP_001131031, NP_057321	XP_005253957	protein_coding	ENSG00000089053	51433	15713
ANAPC7	.	.	.	.	.	.	34.4414	20.1486	26.9867	20.9824	24.7276	25.1882	24.9995	24.1629	24.5143	23.4542	20.8837	21.0811	anaphase promoting complex subunit 7 [Source:HGNC Symbol;Acc:HGNC:17380]	chr12:110810704-110841535	NM_001137664, NM_016238	XM_011538454, XM_005253903	.	.	NP_001131136, NP_057322	XP_005253960, XP_011536756	protein_coding	ENSG00000196510	51434	17380
ANG	.	.	.	.	.	.	0.41331	1.1081	1.45602	144.676	155.865	162.541	139.971	136.076	137.848	136.931	145.882	143.47	angiogenin [Source:HGNC Symbol;Acc:HGNC:483]	chr14:21152258-21169374	NM_001097577, NM_001145	.	.	.	NP_001091046, NP_001136	.	protein_coding	ENSG00000214274	283	483
ANGEL1	.	.	.	.	.	.	12.1666	5.35683	6.06933	10.5598	8.97632	10.804	8.45792	9.18951	10.2621	9.10786	10.6127	10.5068	angel homolog 1 [Source:HGNC Symbol;Acc:HGNC:19961]	chr14:77252520-77279283	NM_015305	.	.	.	NP_056120	.	protein_coding	ENSG00000013523	23357	19961
ANGEL2	.	.	.	.	.	.	5.52786	5.95472	4.36855	5.15705	5.28903	5.02413	4.94926	4.42537	4.89986	5.56287	5.24337	5.07072	angel homolog 2 [Source:HGNC Symbol;Acc:HGNC:30534]	chr1:213165523-213189168	NM_001300753, NM_001300755, NM_001300757, NM_001300758, NM_144567	XM_017002774, XM_011510116, XM_005273347, XM_005273346, XM_005273345, XM_005273344	.	.	NP_001287682, NP_001287684, NP_001287686, NP_001287687, NP_653168	XP_005273401, XP_005273402, XP_005273403, XP_005273404, XP_016858263	protein_coding	ENSG00000174606	90806	30534
ANGPT1	.	.	.	.	.	.	0.715465	0.667924	0.341535	0	0.0437709	0.0491582	0.0959414	0	0.0939741	0.0560877	0	0	angiopoietin 1 [Source:HGNC Symbol;Acc:HGNC:484]	chr8:108263739-108348750	NM_001146, NM_001199859	.	.	.	NP_001137, NP_001186788, NP_001300980	.	protein_coding	ENSG00000154188	284	484
ANGPT2	.	.	.	.	.	.	0	0	0.0589954	0.0348183	0.0497386	0.0147049	0.356755	0.322604	0.0498393	0	0.0557512	0.0138855	angiopoietin 2 [Source:HGNC Symbol;Acc:HGNC:485]	chr8:6264112-6506025	NM_001118887, NM_001118888, NM_001147	.	.	.	NP_001112359, NP_001112360, NP_001138	XP_016868807	protein_coding	ENSG00000091879	285	485
ANGPT4	.	.	.	.	.	.	0.00711601	0.0121628	0.00646203	0	0	0	0	0	0	0	0	0	angiopoietin 4 [Source:HGNC Symbol;Acc:HGNC:487]	chr20:850541-896960	NM_015985	XM_011529243, XM_011529242, XM_011529241, XM_011529239, XM_005260720	.	.	NP_057069	XP_011527541	protein_coding	ENSG00000101280	51378	487
ANGPTL1	.	.	.	.	.	.	0	0	0	0.943784	1.81866	2.48892	0.092093	0.144375	1.60227	1.67063	0.869796	1.01777	angiopoietin like 1 [Source:HGNC Symbol;Acc:HGNC:489]	chr1:178694281-178890976	NM_004673	XM_005245577	.	.	NP_004664	XP_005245634	protein_coding	ENSG00000116194	9068	489
ANGPTL2	.	.	.	.	.	.	0.765018	0.161113	0.690075	0.291993	0.345179	0.330928	0.372037	0.100651	0.168587	0.261892	0.34894	0.235046	angiopoietin like 2 [Source:HGNC Symbol;Acc:HGNC:490]	chr9:129677052-129985443	NM_012098	.	.	.	NP_036230	.	protein_coding	ENSG00000136859	23452	490
ANGPTL3	.	.	.	.	.	.	0	0	0	0.242241	0.285749	0.32565	0.0576976	0.0275042	0.228158	0.327901	0.234601	0.24988	angiopoietin like 3 [Source:HGNC Symbol;Acc:HGNC:491]	chr1:62920396-63154039	NM_014495	.	.	.	NP_055310	.	protein_coding	ENSG00000132855	27329	491
ANGPTL4	◎	◎	.	◎	.	◎	3.46477	9.05534	13.5014	9.76699	8.93169	8.76886	1.40561	1.12058	4.13177	4.61136	8.82944	10.7045	angiopoietin like 4 [Source:HGNC Symbol;Acc:HGNC:16039]	chr19:8429034-8439257	NM_001039667, NM_139314	XM_005272485, XM_005272484	.	.	NP_001034756, NP_647475	XP_005272541, XP_005272542	protein_coding	ENSG00000167772	51129	16039
ANGPTL5	.	.	.	.	.	.	0	0	0	0	0	0	0	0.0345167	0	0	0	0	angiopoietin like 5 [Source:HGNC Symbol;Acc:HGNC:19705]	chr11:101761404-101871789	NM_178127	.	.	.	NP_835228	.	protein_coding	ENSG00000187151	253935	19705
ANGPTL6	.	.	.	.	.	.	0.328446	0.156576	0.0284067	0.325633	0.63291	0.585555	0.33288	0.304263	0.437533	0.245696	0.256336	0.394929	angiopoietin like 6 [Source:HGNC Symbol;Acc:HGNC:23140]	chr19:10196805-10213472	NM_001321411, NM_031917	XM_011528350, XM_011528348, XM_011528347, XM_005260091	.	.	NP_001308340, NP_114123	XP_005260148, XP_011526649, XP_011526650, XP_011526652, XP_016882836	protein_coding	ENSG00000130812	83854	23140
ANGPTL7	.	.	.	.	.	.	0	0	0	0	0	0	0	0	0	0	0	0	angiopoietin like 7 [Source:HGNC Symbol;Acc:HGNC:24078]	chr1:11166591-11322564	NM_021146	.	.	.	NP_066969	.	protein_coding	ENSG00000171819	10218	24078
ANGPTL8	◎	.	.	◎	.	◎	0	0	0.0386296	23.1845	30.7125	30.934	96.2793	93.6375	26.2167	31.3398	24.4704	21.8986	angiopoietin like 8 [Source:HGNC Symbol;Acc:HGNC:24933]	chr19:11309970-11373128	NM_018687	.	.	.	NP_061157	.	protein_coding	ENSG00000130173	55908	24933
ANHX	.	.	.	.	.	.	0	0	0	0	0	0	0	0	0	0	0	0	anomalous homeobox [Source:HGNC Symbol;Acc:HGNC:40024]	chr12:133794897-133812681	NM_001191054	XM_011534822, XM_011534821, XM_011534820, XM_011534819, XM_011534818, XM_006719743	.	.	NP_001177983	XP_006719806, XP_011533120, XP_011533123, XP_011533124	protein_coding	ENSG00000227059	647589	40024
ANK1	.	.	.	.	.	.	11.4845	1.35259	20.2982	0.512994	0.270019	0.302206	0.345753	0.12021	0.184648	0.261906	0.46518	0.560809	ankyrin 1 [Source:HGNC Symbol;Acc:HGNC:492]	chr8:41510738-41754280	NM_000037, NM_001142445, NM_001142446, NM_020475, NM_020476, NM_020477, NM_020478, NM_020480	XM_011544506, XM_011544505, XM_011544504, XM_011544503, XM_011544502, XM_011544501, XM_011544500, XM_011544499, XM_011544498, XM_011544497, XM_011544496, XM_011544495, XM_011544494, XM_011544493, XM_011544492, XM_011544491, XM_011544490, XM_005273476	.	.	NP_000028, NP_001135917, NP_001135918, NP_065208, NP_065209, NP_065210, NP_065211, NP_065213	XP_005273533, XP_011542792, XP_011542793, XP_011542796, XP_011542797, XP_011542798, XP_011542802, XP_011542803, XP_011542804, XP_011542805, XP_011542806, XP_011542807, XP_016868808, XP_016868809, XP_016868810, XP_016868811, XP_016868812, XP_016868813, XP_016868814, XP_016868815	protein_coding	ENSG00000029534	286	492
ANK2	.	.	◎	.	.	◎	0.282374	0.0918305	0.18974	5.26286	2.2654	1.98022	1.17128	0.986138	1.83299	1.99616	4.84021	5.68551	ankyrin 2, neuronal [Source:HGNC Symbol;Acc:HGNC:493]	chr4:113739264-114304896	NM_001127493, NM_001148, NM_020977	XM_017008096, XM_017008087, XM_011531891, XM_006714194, XM_006714193, XM_006714192, XM_006714191, XM_006714189, XM_006714188, XM_005262948, XM_005262945, XM_005262942	.	.	NP_001120965, NP_001139, NP_066187	XP_005263002, XP_016863556, XP_016863557, XP_016863558, XP_016863559, XP_016863560, XP_016863561, XP_016863562, XP_016863563, XP_016863564, XP_016863565, XP_016863566, XP_016863567, XP_016863572, XP_016863573, XP_016863574, XP_016863576, XP_016863577, XP_016863578, XP_016863579, XP_016863581, XP_016863582, XP_016863583, XP_016863585, XP_016863587, XP_016863588, XP_016863592	protein_coding	ENSG00000145362	287	493
ANK3	.	.	.	.	.	.	1.24443	1.79618	2.47614	0	0.0175108	0.0103201	0	0	0	0	0	0	ankyrin 3, node of Ranvier (ankyrin G) [Source:HGNC Symbol;Acc:HGNC:494]	chr10:61786055-62493248	NM_001149, NM_001204403, NM_001204404, NM_020987	XM_017016133, XM_017016131, XM_017016130, XM_011539718, XM_011539717, XM_011539716, XM_011539713, XM_011539712, XM_011539711, XM_011539710, XM_011539709, XM_011539708, XM_011539707, XM_011539706, XM_011539705, XM_011539704, XM_011539703, XM_011539702, XM_011539701, XM_006717802, XM_006717796, XM_006717795, XM_006717793, XM_006717791, XM_005269716, XM_005269715	.	.	NP_001140, NP_001191332, NP_001191333, NP_001307803, NP_066267	XP_005269772, XP_006717859, XP_006717865, XP_011538010, XP_011538011, XP_016871599, XP_016871600, XP_016871601, XP_016871602, XP_016871603, XP_016871604, XP_016871605, XP_016871606, XP_016871617, XP_016871618, XP_016871619, XP_016871620, XP_016871621, XP_016871622, XP_016871623, XP_016871624, XP_016871639	protein_coding	ENSG00000151150	288	494
ANKAR	.	.	.	.	.	.	0.107234	0.159094	0.0617356	0.739577	0.624437	0.70952	0.694333	0.454504	0.722092	0.707099	0.721842	0.757312	ankyrin and armadillo repeat containing [Source:HGNC Symbol;Acc:HGNC:26350]	chr2:190540710-190611375	NM_144708	XM_011510693, XM_011510692, XM_011510691, XM_011510687, XM_011510685, XM_011510684, XM_011510683, XM_011510682, XM_011510681, XM_011510680, XM_011510679, XM_011510678, XM_011510677, XM_011510676, XM_011510675, XM_011510674, XM_011510673	.	.	NP_653309	XP_011508975, XP_011508976, XP_011508977, XP_011508978, XP_011508979, XP_011508981, XP_011508982, XP_011508983, XP_011508984, XP_011508987, XP_011508989, XP_011508993, XP_011508994, XP_011508995	protein_coding	ENSG00000151687	150709	26350
ANKDD1A	.	.	.	.	.	.	1.3717	0.874499	0.895071	0.110509	0.121011	0.057894	0.288489	0.118349	0.0277697	0.0681642	0	0.221019	ankyrin repeat and death domain containing 1A [Source:HGNC Symbol;Acc:HGNC:28002]	chr15:65134081-65251042	NM_182703	.	.	.	NP_874362	.	protein_coding	ENSG00000166839	348094	28002
ANKDD1B	.	.	.	.	.	.	0	0.0129389	0	0.280302	0.145061	0.162469	0	0.0294908	0.123591	0.111156	0.191882	0.368721	ankyrin repeat and death domain containing 1B [Source:HGNC Symbol;Acc:HGNC:32525]	chr5:74907283-74967671	NM_001276713	XM_011543621, XM_011543620, XM_011543619, XM_011543618, XM_011543617, XM_011543616	.	.	NP_001263642	XP_011541920	protein_coding	ENSG00000189045	728780	32525
ANKEF1	.	.	.	.	.	.	5.70086	8.81333	2.80977	2.84573	4.24911	3.91063	3.6224	3.80134	3.8198	4.15141	2.91367	2.77779	ankyrin repeat and EF-hand domain containing 1 [Source:HGNC Symbol;Acc:HGNC:15803]	chr20:10015688-10038951	NM_001303472, NM_022096, NM_198798	XM_005260792	.	.	NP_001290401, NP_071379, NP_942093	XP_005260849	protein_coding	ENSG00000132623	63926	15803
ANKFN1	.	.	.	.	.	.	0.0122291	0.0354347	0.0479941	0	0.0260157	0	0.0282514	0	0	0	0	0	ankyrin repeat and fibronectin type III domain containing 1 [Source:HGNC Symbol;Acc:HGNC:26766]	chr17:54230835-54589020	NM_153228	XM_011524431, XM_011524430, XM_011524429, XM_011524428, XM_011524427, XM_011524426, XM_011524425, XM_006721728	.	.	NP_694960	XP_006721791, XP_011522730, XP_011522731, XP_011522732, XP_011522733, XP_016879752, XP_016879753, XP_016879754, XP_016879755, XP_016879756, XP_016879757, XP_016879758, XP_016879759	protein_coding	ENSG00000153930	162282	26766
ANKFY1	.	.	.	.	.	.	14.1751	14.024	15.2995	9.89082	10.5637	9.82791	7.66068	7.93267	9.75858	9.80871	10.0362	9.7454	ankyrin repeat and FYVE domain containing 1 [Source:HGNC Symbol;Acc:HGNC:20763]	chr17:4046504-4167272	NM_001257999, NM_016376	XM_017024733, XM_011523931, XM_011523930, XM_011523929, XM_011523928, XM_011523927, XM_011523926, XM_005256679	.	.	NP_001244928, NP_057460	XP_005256736, XP_011522228, XP_011522230, XP_016880222	protein_coding	ENSG00000185722	51479	20763
ANKH	.	.	.	.	.	.	4.48535	3.5179	4.57648	7.31141	8.15242	7.8791	6.88242	7.40705	7.93689	7.87808	7.42987	7.19295	ANKH inorganic pyrophosphate transport regulator [Source:HGNC Symbol;Acc:HGNC:15492]	chr5:14704912-14871887	NM_054027	XM_017009644	.	.	NP_473368	XP_016865133	protein_coding	ENSG00000154122	56172	15492
ANKHD1	.	.	.	.	.	.	18.8862	33.3543	25.3603	35.9191	31.3811	31.2525	35.5005	34.8425	29.1119	29.8139	37.1207	34.7175	ankyrin repeat and KH domain containing 1 [Source:HGNC Symbol;Acc:HGNC:24714]	chr5:139781398-139929163	NM_001197030, NM_017747, NM_017978, NM_024668	.	.	.	NP_001183959, NP_060217, NP_060448, NP_078944	.	protein_coding	ENSG00000131503	54882	24714
ANKHD1-EIF4EBP3	.	.	.	.	.	.	0.00074832	0.000791959	0.00099973	0.00147001	0.00954663	0.0452507	0.00230246	0.00193182	0.634313	0.0214704	0.000713479	0.00222654	ANKHD1-EIF4EBP3 readthrough [Source:HGNC Symbol;Acc:HGNC:33530]	chr5:139781398-139929163	NM_020690	.	.	.	NP_065741	.	protein_coding	ENSG00000254996	404734	33530
ANKIB1	.	.	.	.	.	.	7.04638	12.2869	10.9227	10.6648	8.75951	9.30015	12.0688	12.6298	9.66576	10.2814	11.0373	10.2924	ankyrin repeat and IBR domain containing 1 [Source:HGNC Symbol;Acc:HGNC:22215]	chr7:91875547-92030698	NM_019004	XM_011516335, XM_011516334, XM_005250458, XM_005250457	.	.	NP_061877	XP_005250514, XP_005250515, XP_011514636, XP_011514637	protein_coding	ENSG00000001629	54467	22215
ANKK1	.	.	.	.	.	.	1.97063	0.371818	1.73253	0.0307381	0.0573984	0.030812	0.0310484	0	0	0.0746525	0.0312429	0.0302333	ankyrin repeat and kinase domain containing 1 [Source:HGNC Symbol;Acc:HGNC:21027]	chr11:113258512-113271140	NM_178510	XM_011542737, XM_011542736	.	.	NP_848605	XP_011541038, XP_011541039, XP_011541040, XP_016872964	protein_coding	ENSG00000170209	255239	21027
ANKLE1	.	.	.	.	.	.	20.8275	6.90825	19.1442	0.900696	0.904823	0.725688	0.961401	0.631853	0.689074	1.03509	0.779172	1.02222	ankyrin repeat and LEM domain containing 1 [Source:HGNC Symbol;Acc:HGNC:26812]	chr19:17392453-17398455	NM_001278443, NM_001278444, NM_001278445, NM_152363	.	.	.	NP_001265372, NP_001265373, NP_001265374, NP_689576	.	protein_coding	ENSG00000160117	126549	26812
ANKLE2	.	.	.	.	.	.	37.8281	50.6264	53.5502	13.864	13.1874	13.4719	17.1539	18.7022	14.8053	15.3822	13.984	13.744	ankyrin repeat and LEM domain containing 2 [Source:HGNC Symbol;Acc:HGNC:29101]	chr12:133302088-133338474	NM_015114	XM_006719735, XM_005266160, XM_005266159	.	.	NP_055929	XP_005266216, XP_005266217, XP_006719798	protein_coding	ENSG00000176915	23141	29101
ANKMY1	.	.	.	.	.	.	5.22061	1.3583	1.9426	4.63295	3.52975	5.04081	3.92083	4.28153	4.41427	5.0212	4.53261	4.73329	ankyrin repeat and MYND domain containing 1 [Source:HGNC Symbol;Acc:HGNC:20987]	chr2:241418838-241503431	NM_001282771, NM_001282780, NM_001282781, NM_001308375, NM_016552, NM_017844	XM_011511322, XM_011511318, XM_011511317, XM_011511301, XM_006712569	.	.	NP_001269700, NP_001269709, NP_001269710, NP_001295304, NP_057636, NP_060314	XP_006712632, XP_011509603, XP_011509607, XP_011509611, XP_011509619, XP_011509620, XP_011509624, XP_016859772	protein_coding	ENSG00000144504	51281	20987
ANKMY2	.	.	.	.	.	.	4.35392	5.91301	3.44168	11.5567	13.5028	12.9514	7.21947	7.75409	8.64914	8.58784	11.6075	11.5059	ankyrin repeat and MYND domain containing 2 [Source:HGNC Symbol;Acc:HGNC:25370]	chr7:16639400-16685442	NM_020319	XM_011515458	.	.	NP_064715	XP_011513760	protein_coding	ENSG00000106524	57037	25370
ANKRA2	.	.	.	.	.	.	3.13614	4.38874	3.7859	11.7037	11.2778	11.5557	12.0009	12.1065	10.0208	11.2055	11.5206	11.8867	ankyrin repeat family A member 2 [Source:HGNC Symbol;Acc:HGNC:13208]	chr5:72848159-72861511	NM_023039	XM_005248560	.	.	NP_075526	XP_005248617	protein_coding	ENSG00000164331	57763	13208
ANKRD1	.	.	◎	.	.	◎	0.0886478	1.20644	0.498708	0.556632	11.912	9.35314	13.9599	12.6954	14.4615	13.5872	0.492739	0.620525	ankyrin repeat domain 1 [Source:HGNC Symbol;Acc:HGNC:15819]	chr10:92671852-92681033	NM_014391	.	.	.	NP_055206	.	protein_coding	ENSG00000148677	27063	15819
ANKRD10	.	.	.	.	.	.	19.3279	19.2099	52.5356	47.9617	48.2118	49.5492	56.4925	59.0072	49.604	52.7193	47.8862	48.0371	ankyrin repeat domain 10 [Source:HGNC Symbol;Acc:HGNC:20265]	chr13:111530886-111567416	NM_001286721, NM_017664	.	.	.	NP_001273650, NP_060134	.	protein_coding	ENSG00000088448	55608	20265
ANKRD11	.	.	.	.	.	.	25.9944	40.3665	26.6767	23.2245	20.1009	21.9355	34.0438	33.9211	27.2757	25.8158	23.6765	22.7726	ankyrin repeat domain 11 [Source:HGNC Symbol;Acc:HGNC:21316]	chr16:89334034-89556969	NM_001256182, NM_001256183, NM_013275	XM_017023187, XM_017023186, XM_017023185, XM_017023184, XM_017023183, XM_017023182, XM_011523057, XM_011523056, XM_011523055, XM_011523054, XM_011523053, XM_011523052, XM_011523051, XM_006721184, XM_006721181	.	.	NP_001243111, NP_001243112, NP_037407	XP_006721244, XP_006721247, XP_011521353, XP_011521354, XP_011521355, XP_011521356, XP_011521357, XP_011521358, XP_011521359, XP_016878671, XP_016878672, XP_016878673, XP_016878674, XP_016878675, XP_016878676	protein_coding	ENSG00000167522	29123	21316
ANKRD12	.	.	.	.	.	.	1.7487	3.06534	3.15514	5.89364	7.03793	7.07363	9.05473	9.67699	7.40978	8.49472	5.96606	5.82122	ankyrin repeat domain 12 [Source:HGNC Symbol;Acc:HGNC:29135]	chr18:9136774-9285983	NM_001083625, NM_001204056, NM_015208	XM_017025664, XM_017025663, XM_005258096, XM_005258095, XM_005258093, XM_005258092	.	.	NP_001077094, NP_001190985, NP_056023	XP_005258149, XP_005258150, XP_005258152, XP_005258153, XP_011523940, XP_016881150, XP_016881151, XP_016881152, XP_016881153, XP_016881154, XP_016881155	protein_coding	ENSG00000101745	23253	29135
ANKRD13A	.	.	.	.	.	.	19.8107	33.0943	34.7605	17.3316	16.8666	18.1699	13.8311	14.2739	13.2799	14.2007	17.3644	17.2988	ankyrin repeat domain 13A [Source:HGNC Symbol;Acc:HGNC:21268]	chr12:110437327-110511491	NM_033121	XM_011538938, XM_011538937, XM_005253984, XM_005253982, XM_005253981, XM_005253980	.	.	NP_149112	XP_005254037, XP_005254038, XP_005254039, XP_005254041, XP_011537239, XP_011537240	protein_coding	ENSG00000076513	88455	21268
ANKRD13B	.	.	◎	.	.	◎	11.8232	2.84929	6.71602	2.41532	0.918079	1.01461	1.70566	1.84623	1.06424	1.18474	2.4614	2.36923	ankyrin repeat domain 13B [Source:HGNC Symbol;Acc:HGNC:26363]	chr17:27920485-27949917	NM_152345	XM_011524319, XM_005257920	.	.	NP_689558	XP_005257977, XP_011522621	protein_coding	ENSG00000198720	124930	26363
ANKRD13C	.	.	.	.	.	.	4.96953	12.4732	9.58464	7.08077	8.10324	7.83579	11.2098	10.4889	7.53075	9.0389	7.41236	6.74919	ankyrin repeat domain 13C [Source:HGNC Symbol;Acc:HGNC:25374]	chr1:70726270-70820417	NM_030816	XM_006710929, XM_005271235, XM_005271234	.	.	NP_110443	XP_005271291, XP_005271292, XP_006710992	protein_coding	ENSG00000118454	81573	25374
ANKRD13D	.	.	.	.	.	.	17.9943	13.2199	16.6121	10.0329	8.53541	8.20135	12.5273	12.033	10.5642	10.6642	9.54529	10.5205	ankyrin repeat domain 13D [Source:HGNC Symbol;Acc:HGNC:27880]	chr11:67056017-67069956	NM_207354	XM_011544987, XM_011544986, XM_011544985	.	.	NP_997237	XP_011543287, XP_011543288, XP_011543289	protein_coding	ENSG00000172932	338692	27880
ANKRD16	.	.	.	.	.	.	5.25235	1.20719	2.14868	3.90373	5.05192	5.52401	2.57461	3.62741	4.94221	4.55633	4.09775	3.7097	ankyrin repeat domain 16 [Source:HGNC Symbol;Acc:HGNC:23471]	chr10:5903579-5931869	NM_001009941, NM_001009943, NM_019046	.	.	.	NP_001009941, NP_001009943, NP_061919	.	protein_coding	ENSG00000134461	54522	23471
ANKRD17	.	.	.	.	.	.	15.5703	23.6297	18.2947	22.0046	21.0476	21.1955	22.9592	24.1156	22.4329	23.6582	21.7378	22.2713	ankyrin repeat domain 17 [Source:HGNC Symbol;Acc:HGNC:23575]	chr4:73939092-74124515	NM_001286771, NM_015574, NM_032217, NM_198889	XM_005265671, XM_005265667	.	.	NP_001273700, NP_056389, NP_115593, NP_942592	XP_005265728, XP_016863500, XP_016863501, XP_016863502	protein_coding	ENSG00000132466	26057	23575
ANKRD18A	.	.	.	.	.	.	0.692121	0.734429	1.00887	1.86594	1.3091	1.49453	1.68475	2.16415	1.81123	1.682	2.00291	1.72897	ankyrin repeat domain 18A [Source:HGNC Symbol;Acc:HGNC:23643]	chr9:38571354-38620657	NM_147195	XM_011517839, XM_011517838	.	.	NP_671728	XP_006716812, XP_011516138, XP_011516139, XP_011516141	protein_coding	ENSG00000180071	253650	23643
ANKRD18B	.	.	.	.	.	.	1.38874	1.3759	1.42375	0	0.0169348	0	0	0.0355918	0	0	0	0	ankyrin repeat domain 18B [Source:HGNC Symbol;Acc:HGNC:23644]	chr9:33524391-33572999	NM_001244752	.	.	.	NP_001231681	.	protein_coding	ENSG00000230453	441459	23644
ANKRD2	.	.	.	.	.	.	1.7776	0.53224	1.16996	0.0306709	0	0	0	0	0	0	0.0613417	0	ankyrin repeat domain 2 [Source:HGNC Symbol;Acc:HGNC:495]	chr10:99332255-99343641	NM_001129981, NM_001291218, NM_001291219, NM_020349	.	.	.	NP_001123453, NP_001278147, NP_001278148, NP_065082	.	protein_coding	ENSG00000165887	26287	495
ANKRD20A1	.	.	.	.	.	.	0	0.0180939	0.00814533	0.00988369	0.0368378	0.0208477	0	0.0194489	0.0202586	0.0235022	0	0.0197674	ankyrin repeat domain 20 family member A1 [Source:HGNC Symbol;Acc:HGNC:23665]	chr9:67926760-67987998	NM_032250	XM_011545682, XM_011545681, XM_005272532	.	.	NP_115626	XP_005272589, XP_011543984	protein_coding	ENSG00000260691	84210	23665
ANKRD20A2	.	.	.	.	.	.	0	0	0.0169519	0	0	0	0	0	0	0	0	0	ankyrin repeat domain 20 family member A2 [Source:HGNC Symbol;Acc:HGNC:31979]	chr9:42368302-42411410	NM_001012421	XM_011517879, XM_011517878, XM_011517877	.	.	NP_001012421	XP_011516179, XP_011516180, XP_011516181	protein_coding	ENSG00000183148	441430	31979
ANKRD20A3	.	.	.	.	.	.	0	0	0	0	0	0	0	0	0	0	0	0	ankyrin repeat domain 20 family member A3 [Source:HGNC Symbol;Acc:HGNC:31981]	chr9:43089971-43133544	NM_001012419	XM_011543861, XM_011543860, XM_005272525	.	.	NP_001012419	XP_005272582, XP_011542162, XP_011542163	protein_coding	ENSG00000276203	441425	31981
ANKRD20A4	.	.	.	.	.	.	0	0.00808568	0	0	0	0	0	0	0	0	0	0	ankyrin repeat domain 20 family member A4 [Source:HGNC Symbol;Acc:HGNC:31982]	chr9:69381811-69425560	NM_001098805	.	.	.	NP_001092275	.	protein_coding	ENSG00000172014	728747	31982
ANKRD22	.	.	.	.	.	.	6.04174	7.74647	15.4298	0	0	0	0	0	0	0	0	0	ankyrin repeat domain 22 [Source:HGNC Symbol;Acc:HGNC:28321]	chr10:90581888-90611575	NM_144590	.	.	.	NP_653191	.	protein_coding	ENSG00000152766	118932	28321
ANKRD23	.	.	.	.	.	.	1.31868	1.28883	0.784897	1.93648	1.79254	1.68603	0.782007	0.993178	1.25499	1.62434	2.1382	1.73475	ankyrin repeat domain 23 [Source:HGNC Symbol;Acc:HGNC:24470]	chr2:97503648-97509771	NM_144994	.	.	.	NP_659431	.	protein_coding	ENSG00000163126	200539	24470
ANKRD24	.	.	.	.	.	.	0.309042	0.273789	0.138805	0.0982709	0.0832199	0	0.0590447	0.0717085	0.0419143	0.0265323	0.0990415	0.0975002	ankyrin repeat domain 24 [Source:HGNC Symbol;Acc:HGNC:29424]	chr19:4183350-4224811	NM_133475	XM_011527766, XM_011527765, XM_011527764, XM_011527763, XM_011527762, XM_011527761, XM_011527760, XM_011527759, XM_011527757, XM_011527756	.	.	NP_597732	XP_011526058, XP_011526059, XP_011526063, XP_011526066, XP_011526067	protein_coding	ENSG00000089847	170961	29424
ANKRD26	.	.	.	.	.	.	1.30725	1.19107	1.09195	2.6189	2.77894	2.3621	2.05226	2.0151	2.69064	2.78961	2.68006	2.55773	ankyrin repeat domain 26 [Source:HGNC Symbol;Acc:HGNC:29186]	chr10:27293044-27389427	NM_001256053, NM_014915	XM_011519420, XM_011519419, XM_011519418, XM_011519417, XM_011519416, XM_011519415, XM_006717428, XM_006717425, XM_006717424, XM_006717423	.	.	NP_001242982, NP_055730	XP_006717486, XP_006717488, XP_011517718	protein_coding	ENSG00000107890	22852	29186
ANKRD27	.	.	.	.	.	.	17.7967	10.5034	16.3875	10.71	9.37028	10.1968	15.0958	15.3144	10.7619	10.5459	11.0856	10.3344	ankyrin repeat domain 27 [Source:HGNC Symbol;Acc:HGNC:25310]	chr19:33087912-33166105	NM_032139	XM_006723412, XM_005259310	.	.	NP_115515	XP_006723475	protein_coding	ENSG00000105186	84079	25310
ANKRD28	.	.	.	.	.	.	4.13326	6.33866	8.30515	6.50329	6.37167	6.34732	7.22582	7.61707	6.43988	6.45695	6.70955	6.29704	ankyrin repeat domain 28 [Source:HGNC Symbol;Acc:HGNC:29024]	chr3:15708742-15901278	NM_001195098, NM_001195099, NM_015199	XM_011533551, XM_011533549, XM_011533548, XM_011533547, XM_011533546, XM_011533545, XM_011533544, XM_011533543, XM_011533542, XM_011533541, XM_011533540, XM_005264996	.	.	NP_001182027, NP_001182028, NP_056014	XP_005265053, XP_011531842, XP_011531843, XP_011531844, XP_011531845, XP_011531847, XP_011531848, XP_011531849, XP_011531853, XP_016861515, XP_016861516	protein_coding	ENSG00000206560	23243	29024
ANKRD29	.	.	.	.	.	.	2.64959	1.94523	2.29965	0.107422	0.0985215	0	0	0	0	0	0.108833	0.106012	ankyrin repeat domain 29 [Source:HGNC Symbol;Acc:HGNC:27110]	chr18:21178889-21242849	NM_001308238, NM_173505	XM_011525830, XM_011525829, XM_011525828	.	.	NP_001295167, NP_775776	XP_011524131, XP_011524132	protein_coding	ENSG00000154065	147463	27110
ANKRD30A	.	.	.	.	.	.	0	0	0	0	0	0	0	0	0	0	0	0	ankyrin repeat domain 30A [Source:HGNC Symbol;Acc:HGNC:17234]	chr10:37414715-37673039	NM_052997	XM_011519758, XM_011519757	.	.	NP_443723	XP_011518059, XP_011518060	protein_coding	ENSG00000148513	91074	17234
ANKRD30B	.	.	.	.	.	.	0	0.0183483	0	0	0	0	0	0	0	0	0	0	ankyrin repeat domain 30B [Source:HGNC Symbol;Acc:HGNC:24165]	chr18:14748238-14852479	NM_001145029	XM_011525663, XM_011525662, XM_006722325	.	.	NP_001138501	XP_006722388, XP_011523964	protein_coding	ENSG00000180777	374860	24165
ANKRD30BL	.	.	.	.	.	.	0	0	0	0	0	0	0	0	0	0	0	0	ankyrin repeat domain 30B-like [Source:HGNC Symbol;Acc:HGNC:35167]	chr2:132905479-132919528	.	.	NR_027020	.	.	.	protein_coding	ENSG00000163046	554226	35167
ANKRD31	.	.	.	.	.	.	0.0899274	0.00449237	0.00927008	0.0615823	0.0403623	0.0114227	0.0336502	0.0211696	0.0663987	0.0640914	0.079864	0.0433006	ankyrin repeat domain 31 [Source:HGNC Symbol;Acc:HGNC:26853]	chr5:74364121-74532703	NM_001164443	XM_017009320, XM_017009317, XM_011543302, XM_011543301, XM_011543300, XM_011543299, XM_011543298	.	.	NP_001157915	XP_011541600, XP_011541601, XP_011541602, XP_011541603, XP_011541604, XP_016864806, XP_016864807, XP_016864809	protein_coding	ENSG00000145700	256006	26853
ANKRD33	.	.	.	.	.	.	0	0	0	0	0	0	0.0565361	0	0	0	0	0	ankyrin repeat domain 33 [Source:HGNC Symbol;Acc:HGNC:13788]	chr12:52281743-52285441	NM_001130015, NM_182608	XM_011538279, XM_011538278, XM_011538277, XM_011538276	.	.	NP_001123487, NP_872414	.	protein_coding	ENSG00000167612	341405	13788
ANKRD33B	.	.	.	.	.	.	2.35944	3.48028	2.18375	0	0.036298	0.0100025	0.0294186	0.0361036	0.0284581	0.0116379	0	0	ankyrin repeat domain 33B [Source:HGNC Symbol;Acc:HGNC:35240]	chr5:10564579-10657928	NM_001164440	XM_005248344, XM_005248343	.	.	NP_001157912	XP_005248400, XP_005248401	protein_coding	ENSG00000164236	651746	35240
ANKRD34A	.	.	.	.	.	.	0.288581	0.129116	0.155064	0.0761869	0.0485128	0.0265351	0.10335	0.0709046	0.173417	0.0310164	0.051349	0.101025	ankyrin repeat domain 34A [Source:HGNC Symbol;Acc:HGNC:27639]	chr1:145456235-145513536	NM_001039888	XM_011509439, XM_011509438, XM_006711279, XM_005277391	.	.	NP_001034977	XP_005277448, XP_006711342, XP_011507740	protein_coding	ENSG00000272031	284615	27639
ANKRD34B	.	.	.	.	.	.	0.14574	0.0400667	0.145757	0.0115022	0	0.0245325	0.0239703	0.0676035	0	0	0	0.0230045	ankyrin repeat domain 34B [Source:HGNC Symbol;Acc:HGNC:33736]	chr5:79852573-79866307	NM_001004441	XM_011543369, XM_011543368, XM_011543367, XM_011543366, XM_006714599	.	.	NP_001004441	XP_006714662, XP_011541668, XP_011541669, XP_011541670, XP_011541671	protein_coding	ENSG00000189127	340120	33736
ANKRD34C	.	.	.	.	.	.	0	0.00722433	0	0	0	0	0	0	0	0	0	0	ankyrin repeat domain 34C [Source:HGNC Symbol;Acc:HGNC:33888]	chr15:79585626-79590577	NM_001146341	XM_011521549	.	.	NP_001139813	XP_011519851	protein_coding	ENSG00000235711	390616	33888
ANKRD35	.	.	.	.	.	.	0.139364	0	0.0183884	0.0837407	0.0674914	0.098285	0	0.0220637	0.0232887	0.0573764	0.0729744	0.094507	ankyrin repeat domain 35 [Source:HGNC Symbol;Acc:HGNC:26323]	chr1:145549208-145568526	NM_001280799, NM_144698	.	.	.	NP_001267728, NP_653299	.	protein_coding	ENSG00000198483	148741	26323
ANKRD36	.	.	.	.	.	.	0.385925	0.510619	0.648756	1.8288	1.29554	1.73804	0.86627	1.03303	1.47319	1.55211	1.88535	1.77226	ankyrin repeat domain 36 [Source:HGNC Symbol;Acc:HGNC:24079]	chr2:97779232-97930258	NM_001164315	XM_011511136, XM_011511135, XM_011511134, XM_011511133, XM_011511132, XM_011511131, XM_011511130, XM_006712516, XM_006712514	.	.	NP_001157787	XP_006712577, XP_011509432, XP_011509433	protein_coding	ENSG00000135976	375248	24079
ANKRD36B	.	.	.	.	.	.	0.274927	0.197839	0.333012	0.67821	0.696698	0.531563	0.257099	0.409574	0.612224	0.569864	0.724098	0.632322	ankyrin repeat domain 36B [Source:HGNC Symbol;Acc:HGNC:29333]	chr2:98109126-98206428	NM_025190	XM_011511554, XM_011511553, XM_011511552, XM_011511551, XM_011511550, XM_011511549, XM_011511548, XM_011511547, XM_011511546, XM_011511545, XM_011511544, XM_011511543, XM_006712661, XM_005263995	.	.	NP_079466	XP_005264052, XP_006712724, XP_016860067	protein_coding	ENSG00000196912	57730	29333
ANKRD36C	.	.	.	.	.	.	0.432658	0.441344	0.450282	1.26215	0.850102	0.859921	0.578603	0.736909	0.881234	1.04653	1.2659	1.25839	ankyrin repeat domain 36C [Source:HGNC Symbol;Acc:HGNC:32946]	chr2:96514586-96657541	.	.	.	.	.	.	protein_coding	ENSG00000174501	.	32946
ANKRD37	◎	.	.	.	.	◎	1.44222	2.00975	6.10766	5.74964	9.6011	11.5958	4.59074	3.04827	8.08991	5.85634	5.58411	5.91517	ankyrin repeat domain 37 [Source:HGNC Symbol;Acc:HGNC:29593]	chr4:186317637-186321395	NM_181726	.	.	.	NP_859077	XP_016863665	protein_coding	ENSG00000186352	353322	29593
ANKRD39	.	.	.	.	.	.	18.8008	31.3042	17.9535	18.2441	19.8913	19.359	16.0606	14.8489	19.4095	16.5661	17.4052	19.083	ankyrin repeat domain 39 [Source:HGNC Symbol;Acc:HGNC:28640]	chr2:97513721-97523832	NM_016466	.	.	.	NP_057550	.	protein_coding	ENSG00000213337	51239	28640
ANKRD40	.	.	.	.	.	.	27.8492	36.078	32.0856	22.5719	22.4549	22.9684	25.0167	23.6817	23.9651	24.7996	22.7954	22.3484	ankyrin repeat domain 40 [Source:HGNC Symbol;Acc:HGNC:28233]	chr17:48770550-48785285	NM_052855	XM_017025296	.	.	NP_443087	XP_016880785	protein_coding	ENSG00000154945	91369	28233
ANKRD42	◎	.	.	◎	.	◎	3.89361	7.81004	5.3351	2.00327	1.70687	1.50392	4.0576	4.72661	1.94183	2.42889	1.51463	2.49191	ankyrin repeat domain 42 [Source:HGNC Symbol;Acc:HGNC:26752]	chr11:82904780-82967141	NM_001300972, NM_001300973, NM_001300975, NM_001300976, NM_001300977, NM_182603	.	.	.	NP_001287901, NP_001287902, NP_001287904, NP_001287905, NP_001287906, NP_872409	.	protein_coding	ENSG00000137494	338699	26752
ANKRD44	.	.	.	.	.	.	0.112779	0.422352	0.259846	0.0667456	0.0193169	0.030951	0.0821016	0.0198181	0.0496249	0	0.103685	0.0298065	ankyrin repeat domain 44 [Source:HGNC Symbol;Acc:HGNC:25259]	chr2:197859249-198175511	NM_153697	XM_011512150	.	.	NP_710181	.	protein_coding	ENSG00000065413	91526	25259
ANKRD45	.	.	.	.	.	.	0.0647723	0	0	0.0549014	0	0	0	0	0	0	0.0563932	0.0534097	ankyrin repeat domain 45 [Source:HGNC Symbol;Acc:HGNC:24786]	chr1:173578699-173639001	NM_198493	XM_011509470, XM_011509469, XM_011509468, XM_011509467, XM_011509466, XM_011509465, XM_011509464	.	.	NP_940895	XP_011507767, XP_011507768, XP_011507769, XP_011507770, XP_011507771, XP_011507772, XP_016856612	protein_coding	ENSG00000183831	339416	24786
ANKRD46	.	.	.	.	.	.	4.79356	5.37931	4.123	10.7157	11.6638	11.838	8.0193	8.93148	10.9709	11.8106	10.583	10.8485	ankyrin repeat domain 46 [Source:HGNC Symbol;Acc:HGNC:27229]	chr8:101521979-101572012	NM_001270377, NM_001270378, NM_001270379, NM_198401	XM_017013106, XM_006716509	.	.	NP_001257306, NP_001257307, NP_001257308, NP_940683	XP_006716572, XP_016868595	protein_coding	ENSG00000186106	157567	27229
ANKRD49	.	.	.	.	.	.	5.17255	6.14253	5.67454	7.70038	9.43435	8.86826	10.0411	9.88813	7.68518	10.7744	7.80961	7.59115	ankyrin repeat domain 49 [Source:HGNC Symbol;Acc:HGNC:25970]	chr11:94148743-94232749	NM_017704	.	.	.	NP_060174	XP_016873430	protein_coding	ENSG00000168876	54851	25970
ANKRD50	.	.	.	.	.	.	3.54203	6.99182	5.24082	2.59378	1.7974	2.08531	2.41591	2.40885	2.34681	2.21081	2.6699	2.51765	ankyrin repeat domain 50 [Source:HGNC Symbol;Acc:HGNC:29223]	chr4:125585206-125633887	NM_001167882, NM_020337	XM_011532146	.	.	NP_001161354, NP_065070	XP_011530448, XP_016863960	protein_coding	ENSG00000151458	57182	29223
ANKRD52	.	.	.	.	.	.	24.0387	26.299	27.3388	11.0828	7.96203	8.54663	10.7574	11.1055	9.62071	9.88312	10.9115	11.2542	ankyrin repeat domain 52 [Source:HGNC Symbol;Acc:HGNC:26614]	chr12:56623846-56652175	NM_173595	XM_011538197	.	.	NP_775866	XP_011536499, XP_016874672	protein_coding	ENSG00000139645	283373	26614
ANKRD53	.	.	.	.	.	.	0.0187328	0.0906988	0.0642814	0.0263944	0.0489665	0.104887	0.0527898	0.144898	0.0502342	0.0572314	0.0527887	0	ankyrin repeat domain 53 [Source:HGNC Symbol;Acc:HGNC:25691]	chr2:71163011-71222466	NM_001115116, NM_024933	XM_011533114, XM_005264569	.	.	NP_001108588, NP_079209	XP_005264626, XP_011531416	protein_coding	ENSG00000144031	79998	25691
ANKRD54	.	.	.	.	.	.	19.9561	19.6455	22.7168	27.6657	19.4108	19.7188	14.564	14.7009	20.5147	20.1682	26.1784	29.1529	ankyrin repeat domain 54 [Source:HGNC Symbol;Acc:HGNC:25185]	chr22:38226861-38285414	NM_138797	XM_017028593, XM_011529884, XM_011529883, XM_011529882, XM_011529880, XM_011529879, XM_011529877, XM_006724137, XM_006724136	NR_030395	.	NP_620152	XP_006724199, XP_006724200, XP_011528179, XP_011528181, XP_011528182, XP_011528184, XP_011528185, XP_011528186, XP_016884080, XP_016884082	protein_coding	ENSG00000100124	724028	25185
ANKRD55	.	.	.	.	.	.	0	0.0220102	0	0.0425325	0.280506	0.103114	0.0296892	0.14177	0.119149	0.119872	0.0513775	0.0336874	ankyrin repeat domain 55 [Source:HGNC Symbol;Acc:HGNC:25681]	chr5:55395504-55529186	NM_024669	XM_017009853	.	.	NP_078945	XP_016865342	protein_coding	ENSG00000164512	79722	25681
ANKRD6	.	.	.	.	.	.	1.1222	1.40518	1.03821	0.0676415	0.0135901	0.0266044	0.044706	0.0302244	0	0.0702394	0.135283	0	ankyrin repeat domain 6 [Source:HGNC Symbol;Acc:HGNC:17280]	chr6:90142888-90348472	NM_001242809, NM_001242811, NM_001242813, NM_001242814, NM_014942	XM_017010498, XM_011535600, XM_011535599, XM_011535598, XM_011535595, XM_005248681	.	.	NP_001229738, NP_001229740, NP_001229742, NP_001229743, NP_055757	XP_005248738, XP_011533897, XP_011533900, XP_011533901, XP_011533902, XP_016865987	protein_coding	ENSG00000135299	22881	17280
ANKRD60	.	.	.	.	.	.	0	0	0	0	0	0	0	0	0	0	0	0	ankyrin repeat domain 60 [Source:HGNC Symbol;Acc:HGNC:16217]	chr20:56793550-56803709	NM_001304369	.	.	.	NP_001291298	.	protein_coding	ENSG00000124227	140731	16217
ANKRD61	.	.	.	.	.	.	0.140541	0.068141	0.0680406	0	0.0537387	0.172555	0.0582451	0.054672	0.0568453	0	0	0	ankyrin repeat domain 61 [Source:HGNC Symbol;Acc:HGNC:22467]	chr7:6048875-6098861	NM_001271700	.	.	.	NP_001258629	.	protein_coding	ENSG00000157999	100310846	22467
ANKRD62	.	.	.	.	.	.	0	0	0	0.011019	0	0	0	0	0	0	0.022038	0	ankyrin repeat domain 62 [Source:HGNC Symbol;Acc:HGNC:35241]	chr18:12093851-12127938	NM_001277333	XM_011525658	.	.	NP_001264262	XP_011523960, XP_016881209	protein_coding	ENSG00000181626	342850	35241
ANKRD63	.	.	.	.	.	.	0.407947	0.110557	0.391137	0	0	0	0	0	0	0	0	0	ankyrin repeat domain 63 [Source:HGNC Symbol;Acc:HGNC:40027]	chr15:40573644-40574787	NM_001190479	.	.	.	NP_001177408	.	protein_coding	ENSG00000230778	100131244	40027
ANKRD65	◎	.	.	◎	.	◎	36.433	14.9997	35.0629	26.4337	17.4461	16.7285	3.44901	3.46743	12.4476	12.2272	25.9528	26.9146	ankyrin repeat domain 65 [Source:HGNC Symbol;Acc:HGNC:42950]	chr1:1353799-1357149	NM_001145210, NM_001243535, NM_001243536	XM_011541490, XM_011541489, XM_006710647, XM_005244752	.	.	NP_001138682, NP_001230464, NP_001230465	XP_005244809, XP_006710710, XP_011539791, XP_016856813, XP_016856814, XP_016856815	protein_coding	ENSG00000235098	441869	42950
ANKRD66	.	.	.	.	.	.	0	0	0	0	0	0	0	0	0	0	0	0	ankyrin repeat domain 66 [Source:HGNC Symbol;Acc:HGNC:44669]	chr6:46714653-46727243	NM_001162435	.	.	.	NP_001155907	.	protein_coding	ENSG00000230062	100287718	44669
ANKRD7	.	.	.	.	.	.	0.528856	0.171937	0.134655	0	0	0	0	0	0	0	0	0	ankyrin repeat domain 7 [Source:HGNC Symbol;Acc:HGNC:18588]	chr7:117854726-117882746	NM_019644	.	.	.	NP_062618	.	protein_coding	ENSG00000106013	56311	18588
ANKRD9	.	.	.	.	.	.	20.1283	12.7505	20.2449	22.2559	16.1084	17.7356	10.5061	7.05653	13.1078	9.67538	19.5387	24.9731	ankyrin repeat domain 9 [Source:HGNC Symbol;Acc:HGNC:20096]	chr14:102829299-102976136	NM_152326	XM_005267311, XM_005267310	.	.	NP_689539	XP_005267367, XP_005267368	protein_coding	ENSG00000156381	122416	20096
ANKS1A	.	.	.	.	.	.	9.79408	8.64779	11.6717	9.44472	8.12922	7.60852	8.31303	8.19591	7.35955	8.31563	9.5314	9.35804	ankyrin repeat and sterile alpha motif domain containing 1A [Source:HGNC Symbol;Acc:HGNC:20961]	chr6:34857041-35059190	NM_015245	XM_011514436, XM_011514435, XM_011514434, XM_011514433, XM_011514432, XM_011514431, XM_006715036, XM_005248964	.	.	NP_056060	XP_005249021, XP_006715099, XP_011512733, XP_011512734, XP_011512735, XP_011512736, XP_011512737, XP_011512738	protein_coding	ENSG00000064999	23294	20961
ANKS1B	.	.	.	.	.	.	0	0.0654628	0	0	0	0	0	0	0	0	0	0	ankyrin repeat and sterile alpha motif domain containing 1B [Source:HGNC Symbol;Acc:HGNC:24600]	chr12:99038918-100378049	NM_001204065, NM_001204066, NM_001204067, NM_001204068, NM_001204069, NM_001204070, NM_001204079, NM_001204080, NM_001204081, NM_020140, NM_152788, NM_181670	XM_011538572, XM_011538571, XM_011538570, XM_006719514, XM_006719513, XM_006719512, XM_006719511, XM_006719510, XM_006719509, XM_006719508, XM_006719507, XM_006719506, XM_006719505, XM_006719504, XM_005269032, XM_005269029, XM_005269028	.	.	NP_001190994, NP_001190995, NP_001190996, NP_001190997, NP_001190998, NP_001190999, NP_001191008, NP_001191009, NP_001191010, NP_064525, NP_690001, NP_858056	XP_005269085, XP_005269086, XP_005269089, XP_006719567, XP_006719568, XP_006719569, XP_006719570, XP_006719571, XP_006719572, XP_006719573, XP_006719575, XP_006719576, XP_006719577, XP_011536873, XP_016875148, XP_016875150, XP_016875151, XP_016875154	protein_coding	ENSG00000185046	56899	24600
ANKS3	.	.	.	.	.	.	6.74042	3.05492	4.12348	3.68391	2.95517	3.9456	6.3361	5.43783	3.94468	3.61226	3.93592	3.4319	ankyrin repeat and sterile alpha motif domain containing 3 [Source:HGNC Symbol;Acc:HGNC:29422]	chr16:4746510-4817219	NM_001242929, NM_001308089, NM_133450	XM_017022935, XM_011522378, XM_011522376, XM_011522375, XM_011522374, XM_011522373, XM_011522372, XM_005255121, XM_005255119	.	.	NP_001229858, NP_001295018, NP_001311058, NP_597707	XP_005255176, XP_005255178, XP_011520674, XP_011520675, XP_011520676, XP_011520677, XP_011520680, XP_016878424	protein_coding	ENSG00000168096	124401	29422
ANKS4B	.	.	.	.	.	.	0	0.0142417	0	12.9738	11.2751	12.1054	8.2689	8.44517	11.7403	12.0737	13.0421	12.9055	ankyrin repeat and sterile alpha motif domain containing 4B [Source:HGNC Symbol;Acc:HGNC:26795]	chr16:21244985-21265166	NM_145865	.	.	.	NP_665872	.	protein_coding	ENSG00000175311	257629	26795
ANKS6	.	.	.	.	.	.	10.7972	4.04331	6.84276	2.00436	1.94648	1.91769	1.38316	1.48998	2.04672	1.93079	1.97853	2.03018	ankyrin repeat and sterile alpha motif domain containing 6 [Source:HGNC Symbol;Acc:HGNC:26724]	chr9:101494277-101559247	NM_173551	XM_011518357, XM_011518356, XM_006716999, XM_006716998, XM_005251794, XM_005251793	.	.	NP_775822	XP_005251850, XP_005251851, XP_006717061, XP_006717062, XP_011516659, XP_016869934	protein_coding	ENSG00000165138	203286	26724
ANKUB1	.	.	.	.	.	.	0.123889	0.0541294	0.322385	0	0	0	0	0	0	0	0	0	ankyrin repeat and ubiquitin domain containing 1 [Source:HGNC Symbol;Acc:HGNC:29642]	chr3:149478891-149510610	NM_001144960, NM_001315505, NM_001315506	XM_011512800, XM_011512799	.	.	NP_001138432, NP_001302434, NP_001302435	XP_011511100, XP_011511101	protein_coding	ENSG00000206199	389161	29642
ANKZF1	.	.	.	.	.	.	19.688	9.36481	22.002	24.6007	33.1236	31.0193	24.3551	25.2172	31.113	32.0539	25.0909	24.1104	ankyrin repeat and zinc finger domain containing 1 [Source:HGNC Symbol;Acc:HGNC:25527]	chr2:220094478-220136910	NM_001042410, NM_001282792, NM_018089	XM_011511392, XM_005246663	.	.	NP_001035869, NP_001269721, NP_060559	XP_005246720, XP_011509694, XP_016859909	protein_coding	ENSG00000163516	55139	25527
ANLN	◎	.	.	.	.	◎	36.6778	50.9927	82.6984	18.2775	24.6663	25.4214	11.9465	12.2001	21.379	20.15	18.7188	17.8362	anillin actin binding protein [Source:HGNC Symbol;Acc:HGNC:14082]	chr7:36363829-36493400	NM_001284301, NM_001284302, NM_018685	XM_017012356, XM_017012355, XM_006715747, XM_006715746	.	.	NP_001271230, NP_001271231, NP_061155	XP_006715809, XP_006715810, XP_016867843, XP_016867844, XP_016867845	protein_coding	ENSG00000011426	54443	14082
ANO1	.	.	.	.	.	.	12.7712	12.755	14.2012	0	0	0	0	0	0	0	0	0	anoctamin 1 [Source:HGNC Symbol;Acc:HGNC:21625]	chr11:69924407-70035634	NM_018043	XM_017017957, XM_017017956, XM_011545131, XM_011545130, XM_011545129, XM_011545128, XM_011545127, XM_011545126, XM_011545125, XM_011545124, XM_011545123, XM_011545122, XM_011545121, XM_006718605, XM_006718604, XM_006718602	.	.	NP_060513	XP_006718665, XP_006718667, XP_006718668, XP_011543423, XP_011543425, XP_011543426, XP_011543427, XP_011543428, XP_011543429, XP_011543430, XP_011543431, XP_011543433, XP_016873445, XP_016873446	protein_coding	ENSG00000131620	55107	21625
ANO10	.	.	.	.	.	.	8.1453	12.8059	8.89241	5.96067	5.28911	5.23043	7.78416	9.27953	6.27685	5.43131	6.52972	5.39161	anoctamin 10 [Source:HGNC Symbol;Acc:HGNC:25519]	chr3:43407339-43663560	NM_001204831, NM_001204832, NM_001204833, NM_001204834, NM_018075	XM_017006722, XM_017006721, XM_011533887, XM_011533884	.	.	NP_001191760, NP_001191761, NP_001191762, NP_001191763, NP_060545	XP_011532189, XP_016862207, XP_016862209, XP_016862210, XP_016862211	protein_coding	ENSG00000160746	55129	25519
ANO2	.	.	.	.	.	.	0	0	0.00745855	0	0	0	0	0	0	0.0472552	0	0	anoctamin 2 [Source:HGNC Symbol;Acc:HGNC:1183]	chr12:5671816-6055398	NM_001278596, NM_001278597	XM_011520978, XM_011520977, XM_011520976, XM_011520975, XM_006718988	.	.	NP_001265525, NP_001265526	XP_006719051, XP_011519277, XP_011519280, XP_016875161	protein_coding	ENSG00000047617	57101	1183
ANO3	.	.	.	.	.	.	0	0	0.0152315	0.0649008	0.177887	0.240803	0.0774849	0.0719129	0.153702	0.181052	0.0921905	0.037611	anoctamin 3 [Source:HGNC Symbol;Acc:HGNC:14004]	chr11:26331145-26684835	NM_031418	XM_011520283	.	.	NP_001300655, NP_001300656, NP_113606	XP_016873607	protein_coding	ENSG00000134343	63982	14004
ANO4	.	.	.	.	.	.	0.797325	1.38549	1.51321	0.0222194	0.0337803	0	0	0.0689652	0	0	0.0444389	0	anoctamin 4 [Source:HGNC Symbol;Acc:HGNC:23837]	chr12:101188584-101522419	NM_001286615, NM_001286616, NM_178826	XM_017018810, XM_011537917, XM_011537916, XM_011537914, XM_011537913, XM_011537912, XM_011537911	.	.	NP_001273544, NP_001273545, NP_849148	XP_011536213, XP_011536214, XP_011536215, XP_011536216, XP_011536218, XP_016874297, XP_016874298, XP_016874299, XP_016874300	protein_coding	ENSG00000151572	121601	23837
ANO5	.	.	.	.	.	.	0	0.0280852	0.0160168	0	0.0238923	0	0	0	0	0	0	0	anoctamin 5 [Source:HGNC Symbol;Acc:HGNC:27337]	chr11:22214721-22304903	NM_001142649, NM_213599	XM_011519949, XM_005252823, XM_005252822, XM_005252821, XM_005252820	.	.	NP_001136121, NP_998764	XP_005252877, XP_005252878, XP_005252879, XP_011518251	protein_coding	ENSG00000171714	203859	27337
ANO6	.	.	.	.	.	.	10.9356	22.5227	27.4494	30.754	31.7159	31.6222	27.9559	28.7966	31.2168	32.0475	29.9648	31.5432	anoctamin 6 [Source:HGNC Symbol;Acc:HGNC:25240]	chr12:45609802-45834187	NM_001025356, NM_001142678, NM_001142679, NM_001204803	XM_011538024, XM_005268707, XM_005268706	.	.	NP_001020527, NP_001136150, NP_001136151, NP_001191732	XP_005268763, XP_005268764	protein_coding	ENSG00000177119	196527	25240
ANO7	.	.	.	.	.	.	0.74362	0.485943	0.528444	3.14016	2.37391	2.61279	1.12565	1.54394	2.3231	2.33322	3.13144	3.14888	anoctamin 7 [Source:HGNC Symbol;Acc:HGNC:31677]	chr2:242127923-242164791	NM_001001666, NM_001001891	XM_011511267, XM_011511266, XM_011511265, XM_011511264, XM_011511263, XM_011511262, XM_011511261, XM_011511260, XM_011511259, XM_011511258, XM_011511257, XM_011511256	.	.	NP_001001666, NP_001001891	XP_011509565, XP_011509569	protein_coding	ENSG00000146205	50636	31677
ANO8	.	.	.	.	.	.	6.50523	3.56237	6.35807	5.35468	3.37249	3.34454	2.05691	2.12279	3.39199	3.0923	5.54815	5.16121	anoctamin 8 [Source:HGNC Symbol;Acc:HGNC:29329]	chr19:17420339-17445638	NM_020959	.	.	.	NP_066010	XP_016882537	protein_coding	ENSG00000074855	57719	29329
ANO9	.	.	.	.	.	.	7.71885	1.14105	4.3931	19.2651	12.4266	11.6379	7.37686	6.3894	12.1808	11.9179	19.1545	19.3757	anoctamin 9 [Source:HGNC Symbol;Acc:HGNC:20679]	chr11:418262-442011	NM_001012302	XM_011520053, XM_011520049, XM_011520046	.	.	NP_001012302	XP_011518355	protein_coding	ENSG00000185101	338440	20679
ANOS1	.	.	.	.	.	.	0.632726	0.452394	0.73032	0	0	0	0.0419308	0	0	0	0	0	anosmin 1 [Source:HGNC Symbol;Acc:HGNC:6211]	chrX:8496914-8700227	NM_000216	.	.	.	NP_000207	.	protein_coding	ENSG00000011201	3730	6211
ANP32A	.	.	.	.	.	.	154.627	80.6519	116.221	62.5024	78.625	78.5816	50.2419	47.6804	71.2791	77.3928	62.9411	62.0637	acidic nuclear phosphoprotein 32 family member A [Source:HGNC Symbol;Acc:HGNC:13233]	chr15:69070873-69113234	NM_006305	XM_006720707	.	.	NP_006296	.	protein_coding	ENSG00000140350	8125	13233
ANP32B	.	.	.	.	.	.	148.391	103.828	142.489	125.869	128.574	131.081	118.548	121.587	141.909	119.654	123.811	127.928	acidic nuclear phosphoprotein 32 family member B [Source:HGNC Symbol;Acc:HGNC:16677]	chr9:100745642-100778225	NM_006401	.	.	.	NP_006392	.	protein_coding	ENSG00000136938	10541	16677
ANP32D	.	.	.	.	.	.	0.0268676	0.0730799	0.0234571	0.0311675	0.114225	0.0654919	0.061635	0	0	0	0.062335	0	acidic nuclear phosphoprotein 32 family member D [Source:HGNC Symbol;Acc:HGNC:16676]	chr12:48866447-48867407	NM_012404	.	.	.	NP_036536	.	protein_coding	ENSG00000139223	23519	16676
ANP32E	.	.	.	.	.	.	18.7129	20.2006	24.3996	19.7859	28.1959	27.4779	25.4495	24.1295	26.1182	26.3449	19.7133	19.8585	acidic nuclear phosphoprotein 32 family member E [Source:HGNC Symbol;Acc:HGNC:16673]	chr1:150190716-150208504	NM_001136478, NM_001136479, NM_001280559, NM_001280560, NM_030920	XM_005245514, XM_005245513	.	.	NP_001129950, NP_001129951, NP_001267488, NP_001267489, NP_112182	XP_005245570, XP_005245571, XP_016857907	protein_coding	ENSG00000143401	81611	16673
ANPEP	◎	.	.	◎	.	◎	15.0444	8.82471	11.7453	97.042	73.7434	73.7905	23.1672	22.5002	66.251	62.4881	97.004	97.0799	alanyl aminopeptidase, membrane [Source:HGNC Symbol;Acc:HGNC:500]	chr15:90328119-90358094	NM_001150	XM_011521473, XM_005254892	.	.	NP_001141	XP_005254949, XP_011519775	protein_coding	ENSG00000166825	290	500
ANTXR1	◎	.	.	◎	.	◎	10.9977	10.723	12.3181	6.64142	9.93647	11.1101	4.13676	3.63589	10.9006	11.4825	6.69383	6.58902	anthrax toxin receptor 1 [Source:HGNC Symbol;Acc:HGNC:21014]	chr2:69240309-69476459	NM_018153, NM_032208, NM_053034	XM_011533124	.	.	NP_060623, NP_115584, NP_444262	XP_016860564, XP_016860565, XP_016860566	protein_coding	ENSG00000169604	84168	21014
ANTXR2	◎	.	.	◎	.	◎	3.51717	14.7101	11.7466	5.00702	4.6082	4.59236	16.9515	18.8545	5.85679	5.06348	4.42576	5.58827	anthrax toxin receptor 2 [Source:HGNC Symbol;Acc:HGNC:21732]	chr4:80822302-80994626	NM_001145794, NM_001286780, NM_001286781, NM_058172	XM_011531587	.	.	NP_001139266, NP_001273709, NP_001273710, NP_477520	XP_011529889	protein_coding	ENSG00000163297	118429	21732
ANTXRL	.	.	.	.	.	.	0.016567	0	0.0150461	0	0	0	0	0	0	0	0	0	anthrax toxin receptor-like [Source:HGNC Symbol;Acc:HGNC:27277]	chr10:47658232-47701365	NM_001278688	XM_011539437, XM_011539436, XM_011539435, XM_011539434, XM_011539433, XM_011539432, XM_011539431, XM_011539430, XM_006717684	.	.	NP_001265617	XP_006717747, XP_011537732, XP_011537733, XP_011537735, XP_011537736, XP_011537739	protein_coding	ENSG00000274209	195977	27277
ANXA1	.	.	.	.	.	.	310.666	610.259	473.862	0	0.0424616	0	0	0	0.0458731	0	0	0	annexin A1 [Source:HGNC Symbol;Acc:HGNC:533]	chr9:75766672-75785309	NM_000700	XM_011518609, XM_011518608	.	.	NP_000691	XP_011516911, XP_016870146	protein_coding	ENSG00000135046	301	533
ANXA10	.	.	.	.	.	.	0.154239	5.29803	0.701065	0	0	0	0	0	0	0	0	0	annexin A10 [Source:HGNC Symbol;Acc:HGNC:534]	chr4:169013665-169108841	NM_007193	XM_011531571	.	.	NP_009124	XP_011529873	protein_coding	ENSG00000109511	11199	534
ANXA11	.	.	.	.	.	.	92.315	64.0298	80.9492	25.4149	20.1754	21.2151	15.5359	16.2472	18.9657	19.7371	25.0757	25.7541	annexin A11 [Source:HGNC Symbol;Acc:HGNC:535]	chr10:81910644-81965328	NM_001157, NM_001278407, NM_001278408, NM_001278409, NM_145868, NM_145869	XM_011539736, XM_011539735, XM_006717814, XM_006717813, XM_005269742, XM_005269741	.	.	NP_001148, NP_001265336, NP_001265337, NP_001265338, NP_665875, NP_665876	XP_005269798, XP_005269799, XP_006717876, XP_006717877, XP_011538037, XP_011538038	protein_coding	ENSG00000122359	311	535
ANXA13	.	.	.	.	.	.	0	0	0.0188189	0.681276	0.674752	0.632613	0	0.0455579	0.33264	0.311023	0.713701	0.64885	annexin A13 [Source:HGNC Symbol;Acc:HGNC:536]	chr8:124693033-124749647	NM_001003954, NM_004306	.	.	.	NP_001003954, NP_004297	.	protein_coding	ENSG00000104537	312	536
ANXA2	.	.	.	.	.	.	1803.25	2176.12	2013.51	49.1793	59.1675	55.8214	46.7356	48.1916	48.7428	49.6699	50.8915	47.4671	annexin A2 [Source:HGNC Symbol;Acc:HGNC:537]	chr15:60639332-60690242	NM_001002857, NM_001002858, NM_001136015, NM_004039	XM_011521477, XM_011521476, XM_011521475	.	.	NP_001002857, NP_001002858, NP_001129487, NP_004030	XP_011519777, XP_011519778, XP_011519779, XP_016877579, XP_016877580	protein_coding	ENSG00000182718	302	537
ANXA2R	.	.	.	.	.	.	0.34319	0.0359444	0.164187	1.20882	0.849206	0.972797	0.621157	0.212449	0.976751	1.39267	0.829747	1.58788	annexin A2 receptor [Source:HGNC Symbol;Acc:HGNC:33463]	chr5:43039182-43043272	NM_001014279	.	.	.	NP_001014301	.	protein_coding	ENSG00000177721	389289	33463
ANXA3	◎	.	◎	.	.	◎	68.4	139.551	147.573	0.546921	5.67319	5.41745	13.1401	11.5216	8.97299	8.39212	0.467253	0.62659	annexin A3 [Source:HGNC Symbol;Acc:HGNC:541]	chr4:79472672-79531575	NM_005139	XM_011531906	.	.	NP_005130	.	protein_coding	ENSG00000138772	306	541
ANXA4	◎	.	.	◎	.	◎	29.5407	14.0829	17.9514	102.432	128.358	134.127	38.7529	36.8188	85.1842	92.3641	107.055	97.8084	annexin A4 [Source:HGNC Symbol;Acc:HGNC:542]	chr2:69969105-70054232	NM_001153	XM_011532805	.	.	NP_001144, NP_001307627, NP_001307629	XP_011531107, XP_016859432	protein_coding	ENSG00000196975	307	542
ANXA5	.	.	.	.	.	.	228.763	517.575	383.927	169.496	222.447	230.718	333.584	351.091	238.305	246.838	170.771	168.22	annexin A5 [Source:HGNC Symbol;Acc:HGNC:543]	chr4:122589109-122618268	NM_001154	.	.	.	NP_001145	.	protein_coding	ENSG00000164111	308	543
ANXA6	.	.	.	.	.	.	13.6513	10.9481	5.82424	64.9283	61.0483	62.2495	48.7154	47.0212	58.049	55.451	66.5525	63.304	annexin A6 [Source:HGNC Symbol;Acc:HGNC:544]	chr5:150480665-150537443	NM_001155, NM_001193544	XM_005268432	.	.	NP_001146, NP_001180473	XP_005268489	protein_coding	ENSG00000197043	309	544
ANXA7	.	.	.	.	.	.	60.9944	82.7289	60.6893	33.6381	34.6879	35.3082	51.0989	52.9198	37.704	36.2261	33.5711	33.7051	annexin A7 [Source:HGNC Symbol;Acc:HGNC:545]	chr10:75134858-75173825	NM_001156, NM_001320879, NM_004034	XM_017016162, XM_005269739, XM_005269738	.	.	NP_001147, NP_001307808, NP_001307809, NP_004025	XP_016871651, XP_016871652	protein_coding	ENSG00000138279	310	545
ANXA8	.	.	.	.	.	.	8.72826	3.65378	6.33022	0	0	0	0	0	0	0	0	0	annexin A8 [Source:HGNC Symbol;Acc:HGNC:546]	chr10:48255203-48279200	NM_001040084, NM_001271702, NM_001271703	XM_011540098, XM_011540096, XM_006717951, XM_005276385	.	.	NP_001035173, NP_001258631, NP_001258632	XP_005276442, XP_006718014, XP_011538398, XP_011538400	protein_coding	ENSG00000265190	107984085	546
ANXA8L1	.	.	.	.	.	.	1.0962	0.638772	1.29192	0	0	0	0	0	0	0	0	0	annexin A8-like 1 [Source:HGNC Symbol;Acc:HGNC:23334]	chr10:47157982-47174093	NM_001098845, NM_001278923, NM_001278924	.	NR_033957	.	NP_001092315, NP_001265852, NP_001265853	.	protein_coding	ENSG00000264230	728113	23334
ANXA8L2	.	.	.	.	.	.	35.6943	16.1044	25.2415	0	0	0	0	0	0	0	0	0	annexin A8-like 2 [Source:HGNC Symbol;Acc:23335]	chr10:47746935-47770871	NM_001630	XM_005272404	.	.	NP_001621	XP_005272461	protein_coding	ENSG00000186807	244	23335
ANXA9	◎	.	.	◎	.	◎	2.57703	0.145769	0.708787	12.1588	9.27933	9.60822	1.86218	1.91096	5.22029	4.6674	12.021	12.2965	annexin A9 [Source:HGNC Symbol;Acc:HGNC:547]	chr1:150954492-150968110	NM_003568	XM_011510058, XM_005245539	.	.	NP_003559	XP_011508360	protein_coding	ENSG00000143412	8416	547
AOAH	.	.	.	.	.	.	0.024124	0.0266922	0	0	0	0	0	0	0	0.0404396	0	0	acyloxyacyl hydrolase [Source:HGNC Symbol;Acc:HGNC:548]	chr7:36552556-36764154	NM_001177506, NM_001177507, NM_001637	XM_011515340, XM_011515339, XM_011515338, XM_011515337, XM_011515336, XM_011515335, XM_011515334, XM_011515333	.	.	NP_001170977, NP_001170978, NP_001628	XP_011513635, XP_011513636, XP_011513637, XP_011513638, XP_011513640, XP_011513641, XP_011513642	protein_coding	ENSG00000136250	313	548
AOC1	.	.	.	.	.	.	0.316173	0.0828848	0.776274	0	0	0	0	0	0	0	0	0	amine oxidase, copper containing 1 [Source:HGNC Symbol;Acc:HGNC:80]	chr7:150521714-150558592	NM_001091, NM_001272072	XM_017011946, XM_011516009, XM_011516008	.	.	NP_001082, NP_001259001	XP_011514310, XP_011514311, XP_016867433, XP_016867434, XP_016867435, XP_016867436	protein_coding	ENSG00000002726	26	80
AOC2	◎	.	.	.	.	◎	0.58809	2.51943	1.45704	2.09466	0.999172	1.41468	2.49755	3.01929	1.60094	1.96173	1.96101	2.22831	amine oxidase, copper containing 2 [Source:HGNC Symbol;Acc:HGNC:549]	chr17:40996616-41002724	NM_001158, NM_009590	.	.	.	NP_001149, NP_033720	.	protein_coding	ENSG00000131480	314	549
AOC3	◎	.	.	.	.	◎	0.202464	1.07027	0.643507	33.0982	37.332	38.359	14.8895	15.6565	31.7472	29.116	34.2756	31.9207	amine oxidase, copper containing 3 [Source:HGNC Symbol;Acc:HGNC:550]	chr17:41003200-41010147	NM_001277731, NM_001277732, NM_003734	.	.	.	NP_001264660, NP_001264661, NP_003725	.	protein_coding	ENSG00000131471	8639	550
AOX1	.	.	.	.	.	.	1.77786	3.35808	3.51796	15.9909	9.67329	9.49671	9.28974	10.3293	8.43457	8.50794	16.6293	15.3524	aldehyde oxidase 1 [Source:HGNC Symbol;Acc:HGNC:553]	chr2:201450590-201536218	NM_001159	XM_011511062	.	.	NP_001150	XP_011509364, XP_016859435, XP_016859436	protein_coding	ENSG00000138356	316	553
AP000275.65	.	.	.	.	.	.	5.59595e-06	1.59243	1.22984	1.40952e-05	0.0420093	4.97241e-06	6.34606e-06	0.518751	6.07947e-06	0.830169	2.08297e-05	7.36065e-06	.	chr21:33947150-33985176	.	.	.	.	.	.	protein_coding	ENSG00000265590	.	.
AP000295.9	.	.	.	.	.	.	8.95943e-06	1.18317e-06	4.74044e-06	0.322868	0.315132	1.07889e-05	3.77322e-11	0.674217	4.6565e-14	7.0029e-06	0.460511	0.185225	.	chr21:34602205-34669539	.	.	.	.	.	.	protein_coding	ENSG00000249624	.	.
AP000304.1	.	.	.	.	.	.	0	0	0	0	0	0	0	0	0	0	0	0	.	chr21:34876237-35303911	.	.	.	.	.	.	protein_coding	ENSG00000268265	.	.
AP000304.12	.	.	.	.	.	.	0.0765157	7.34963e-65	0.0794958	5.89261e-72	6.84941e-91	9.5128e-65	6.17094e-85	2.81073e-80	4.6223e-84	1.29316e-89	1.17852e-71	3.12634e-81	.	chr21:34876237-35303911	.	.	.	.	.	.	protein_coding	ENSG00000249209	.	.
AP000322.53	.	.	.	.	.	.	0	0.13759	0	0	0	0	0	0	0	0	0	0	.	chr21:35791012-35796264	.	.	.	.	.	.	protein_coding	ENSG00000243627	.	.
AP000349.1	.	.	.	.	.	.	0	0	0	0	0	0	0	0	0	0	0	0	.	chr22:24115005-24126503	.	.	.	.	.	.	protein_coding	ENSG00000267954	.	.
AP000350.10	.	.	.	.	.	.	0.252586	1.02758	1.38258	3.33122e-05	0.000307747	0.666325	0.000203421	7.96719e-25	4.78915e-05	1.15513e-06	6.1408e-06	6.04836e-05	.	chr22:24198889-24237413	.	.	.	.	.	.	protein_coding	ENSG00000251357	.	.
AP000688.1	.	.	.	.	.	.	0	0	0	0	0	0	0	0	0	0	0	0	Uncharacterized protein [Source:UniProtKB/TrEMBL;Acc:M0QY50]	chr21:37402367-37451687	.	.	.	.	.	.	protein_coding	ENSG00000268098	.	.
AP000695.1	.	.	.	.	.	.	0.0221919	0.242814	0.23839	0	0	0	0	0	0	0	0	0	.	chr21:37832918-37948867	.	.	.	.	.	.	protein_coding	ENSG00000267976	.	.
AP000721.4	.	.	.	.	.	.	3.573e-21	3.7e-110	0.121037	2.68055e-186	0	0	0.117552	0	4.15741e-125	5.81051e-103	4.0318e-251	5.3611e-186	.	chr11:63742078-63933533	.	.	.	.	.	.	protein_coding	ENSG00000256100	.	.
AP000758.1	.	.	.	.	.	.	0	0	0	0	0	0	0	0	0	0	0	0	Uncharacterized protein [Source:UniProtKB/TrEMBL;Acc:M0QZC6]	chr11:120207622-120360645	.	.	.	.	.	.	protein_coding	ENSG00000269601	.	.
AP000867.1	.	.	.	.	.	.	0	0	0	0	0	0	0	0	0	0	0	0	.	chr11:71290759-71318487	.	.	.	.	.	.	protein_coding	ENSG00000187811	.	.
AP000889.3	.	.	.	.	.	.	0	0.0382037	0.0395572	0	0	0	0	0	0	0	0	0	HCG2032453; Uncharacterized protein; cDNA FLJ25337 fis, clone TST00714 [Source:UniProtKB/TrEMBL;Acc:Q96LP0]	chr11:107461816-107537505	.	.	NR_028328	.	.	.	protein_coding	ENSG00000268467	643923	.
AP000974.1	.	.	.	.	.	.	0.056004	0.0382694	0.018701	0.245498	0.232789	0.256331	0.049645	0.0458854	0.145305	0.118776	0.200425	0.290571	CDNA FLJ26432 fis, clone KDN01418; Uncharacterized protein [Source:UniProtKB/TrEMBL;Acc:Q6ZP70]	chr11:85563599-85565986	.	.	.	.	.	.	protein_coding	ENSG00000215504	.	.
AP001024.1	.	.	.	.	.	.	0	0	0	0	0	0	0	0	0	0	0	0	Metazoan signal recognition particle RNA [Source:RFAM;Acc:RF00017]	chr11:107650218-107652316	.	.	.	.	.	.	misc_RNA	ENSG00000214305	.	.
AP001024.2	.	.	.	.	.	.	0	0	0	0	0	0	0	0	0	0	0	0	Uncharacterized protein [Source:UniProtKB/TrEMBL;Acc:H0Y4W8]	chr11:107643128-107647344	.	.	.	.	.	.	protein_coding	ENSG00000214306	.	.
AP001055.1	.	.	.	.	.	.	0	0	0	0	0	0	0	0	0	0	0	0	.	chr21:45587817-45593580	.	.	.	.	.	.	protein_coding	ENSG00000267913	.	.
AP001094.1	.	.	.	.	.	.	0	0	0	0	0	0	0	0	0	0	0	0	Uncharacterized protein [Source:UniProtKB/TrEMBL;Acc:M0R2D6]	chr18:7566779-8406859	.	.	.	.	.	.	protein_coding	ENSG00000268046	.	.
AP001362.1	.	.	.	.	.	.	0	0	0	0	0	0	0	0	0	0	0	0	Uncharacterized protein [Source:UniProtKB/TrEMBL;Acc:M0QXL3]	chr11:65343508-65360121	.	.	.	.	.	.	protein_coding	ENSG00000269018	.	.
AP001421.1	.	.	.	.	.	.	0	2.11091e-132	0	0	0	0	0	0	0	1.99178e-05	0	0	Uncharacterized protein [Source:UniProtKB/TrEMBL;Acc:M0QXV0]	chr21:38739878-38889753	.	.	.	.	.	.	protein_coding	ENSG00000267937	.	.
AP001468.1	.	.	.	.	.	.	1.35127	1.54961	1.178	11.7961	4.52589	5.11098	2.4062	1.74283	1.52176	2.3108	11.861	11.7311	Protein LOC101060037 [Source:UniProtKB/TrEMBL;Acc:M0R212]	chr21:47608054-47648738	.	XM_005261212	.	.	.	XP_005261269	protein_coding	ENSG00000235878	101060037	.
AP001652.1	.	.	.	.	.	.	0	0	0	0	0	0	0	0	0	0	0	0	Uncharacterized protein; cDNA FLJ60524 [Source:UniProtKB/TrEMBL;Acc:B4DH84]	chr11:58672896-58676071	.	.	.	.	.	.	protein_coding	ENSG00000224130	.	.
AP001888.1	.	.	.	.	.	.	0	0	0	0	0	0	0	0	0	0	0	0	Uncharacterized protein [Source:UniProtKB/TrEMBL;Acc:Q14569]	chr11:69585783-69590171	.	.	.	.	.	.	protein_coding	ENSG00000268351	.	.
AP001925.1	.	.	.	.	.	.	0	0	0	0	0	0	0	0	0	0	0	0	.	chr11:108093558-108338258	.	.	.	.	.	.	protein_coding	ENSG00000269042	.	.
AP002353.1	.	.	.	.	.	.	0	0	0	0	0	0	0	0	0	0	0	0	.	chr11:107578103-107595135	.	.	.	.	.	.	protein_coding	ENSG00000268602	.	.
AP002956.1	.	.	.	.	.	.	0	0	0	0	0	0	0	0	0	0	0	0	.	chr11:119019721-119033362	.	.	.	.	.	.	protein_coding	ENSG00000268192	.	.
AP003041.2	.	.	.	.	.	.	0	0	0	0	0	0	0	0	0	0	0	0	Uncharacterized protein [Source:UniProtKB/TrEMBL;Acc:M0QYB7]	chr11:129936835-130014706	.	.	.	.	.	.	protein_coding	ENSG00000267981	.	.
AP003062.1	.	.	.	.	.	.	0	0	0	0	0	0	0	0	0	0	0	0	CDNA FLJ27342 fis, clone TST02993; Uncharacterized protein [Source:UniProtKB/TrEMBL;Acc:Q6ZNQ4]	chr11:134855245-134856693	.	.	.	.	.	.	protein_coding	ENSG00000268936	.	.
AP003419.11	.	.	.	.	.	.	0.564575	2.00166	0.000119303	0.577058	0.000279853	0.0164721	3.3116e-05	0.000287276	7.85449e-05	0.129069	0.000162989	1.15395	.	chr11:67118247-67141648	.	.	.	.	.	.	protein_coding	ENSG00000256514	.	.
AP003733.1	.	.	.	.	.	.	0.133026	0.345567	0.160231	0.464745	0.3373	0.300515	0.576554	0.199537	0.138719	0.431337	0.577059	0.352431	Uncharacterized protein; cDNA FLJ36460 fis, clone THYMU2014801 [Source:UniProtKB/TrEMBL;Acc:Q8N204]	chr11:61735452-61736755	.	.	.	.	.	.	protein_coding	ENSG00000269089	.	.
AP1AR	.	.	.	.	.	.	5.92133	10.8453	8.12085	37.7252	36.162	40.0684	50.4004	48.3796	44.9155	43.403	38.7312	36.7191	adaptor related protein complex 1 associated regulatory protein [Source:HGNC Symbol;Acc:HGNC:28808]	chr4:113152892-113191203	NM_001128426, NM_018569	XM_005263116	.	.	NP_001121898, NP_061039	.	protein_coding	ENSG00000138660	55435	28808
AP1B1	.	.	.	.	.	.	64.8245	39.4986	45.1202	13.6027	12.8113	12.9345	13.4671	14.8896	13.3851	13.0924	13.5751	13.6304	adaptor related protein complex 1 beta 1 subunit [Source:HGNC Symbol;Acc:HGNC:554]	chr22:29723670-29819168	NM_001127, NM_001166019, NM_145730	.	.	.	NP_001118, NP_001159491, NP_663782	.	protein_coding	ENSG00000100280	162	554
AP1G1	.	.	.	.	.	.	16.6694	42.04	21.6236	25.1161	24.3945	26.1082	33.2826	34.5431	26.8445	27.7428	24.8309	25.4014	adaptor related protein complex 1 gamma 1 subunit [Source:HGNC Symbol;Acc:HGNC:555]	chr16:71762902-71843104	NM_001030007, NM_001128	.	.	.	NP_001025178, NP_001119	.	protein_coding	ENSG00000166747	164	555
AP1G2	.	.	.	.	.	.	26.7111	12.6549	20.1613	62.2456	47.9763	47.3772	37.7769	36.5187	45.21	43.9114	60.8231	63.668	adaptor related protein complex 1 gamma 2 subunit [Source:HGNC Symbol;Acc:HGNC:556]	chr14:24025215-24048009	NM_001282474, NM_001282475, NM_003917	XM_011537283, XM_011537282, XM_006720301, XM_005268182, XM_005268179, XM_005268178, XM_005268177, XM_005268175, XM_005268174, XM_005268173, XM_005268172, XM_005268170, XM_005268169, XM_005268168, XM_005268167	.	.	NP_001269403, NP_001269404, NP_003908	XP_005268224, XP_005268225, XP_005268226, XP_005268227, XP_005268229, XP_005268230, XP_005268231, XP_005268232, XP_005268234, XP_005268235, XP_005268236, XP_005268239, XP_006720364, XP_011535585	protein_coding	ENSG00000213983	8906	556
AP1M1	.	.	.	.	.	.	52.7176	40.4059	33.4964	36.0292	24.6845	24.2831	22.7952	25.01	20.7199	20.7024	38.1469	33.9115	adaptor related protein complex 1 mu 1 subunit [Source:HGNC Symbol;Acc:HGNC:13667]	chr19:16308388-16356718	NM_001130524, NM_032493	XM_017027420, XM_011528400, XM_011528399	.	.	NP_001123996, NP_115882	XP_016882909, XP_016882910	protein_coding	ENSG00000072958	8907	13667
AP1M2	◎	◎	.	.	.	◎	82.3255	40.9088	52.7401	9.46304	11.9883	10.7154	3.55824	3.58439	4.80917	5.01682	9.94261	8.98347	adaptor related protein complex 1 mu 2 subunit [Source:HGNC Symbol;Acc:HGNC:558]	chr19:10683346-10697991	NM_001300887, NM_005498	XM_011527615	.	.	NP_001287816, NP_005489	.	protein_coding	ENSG00000129354	10053	558
AP1S1	.	.	.	.	.	.	140.646	105.268	92.8614	23.9578	24.7078	25.9112	14.0213	14.795	21.743	20.9673	23.7059	24.2096	adaptor related protein complex 1 sigma 1 subunit [Source:HGNC Symbol;Acc:HGNC:559]	chr7:100797677-100804558	NM_001283	.	.	.	NP_001274	.	protein_coding	ENSG00000106367	1174	559
AP1S2	.	.	.	.	.	.	1.34782	2.75856	2.37783	7.48181	8.94238	9.43982	9.09533	9.88439	8.63003	9.08652	7.2347	7.72892	adaptor related protein complex 1 sigma 2 subunit [Source:HGNC Symbol;Acc:HGNC:560]	chrX:15843928-15873137	NM_001272071, NM_003916	XM_017029925, XM_011545599	.	.	NP_001259000, NP_003907	XP_011543901, XP_016885414	protein_coding	ENSG00000182287	8905	560
AP1S3	.	.	.	.	.	.	15.7655	17.4869	23.417	2.84283	3.77503	4.68123	6.91171	5.20703	4.70693	4.35564	3.01242	2.67325	adaptor related protein complex 1 sigma 3 subunit [Source:HGNC Symbol;Acc:HGNC:18971]	chr2:224616402-224702319	NM_001039569	.	.	.	NP_001034658	XP_011508902	protein_coding	ENSG00000152056	130340	18971
AP2A1	.	.	.	.	.	.	77.6585	45.716	51.4105	27.3454	23.0997	22.0903	25.0245	25.7965	22.4722	22.8934	26.6149	28.0758	adaptor related protein complex 2 alpha 1 subunit [Source:HGNC Symbol;Acc:HGNC:561]	chr19:50270224-50316527	NM_014203, NM_130787	XM_011526557, XM_011526556	.	.	NP_055018, NP_570603	XP_011524858, XP_011524859	protein_coding	ENSG00000196961	160	561
AP2A2	.	.	.	.	.	.	34.3841	24.5829	32.5671	18.4281	13.3318	13.8842	15.4045	14.7352	13.8296	12.4763	18.1635	18.6928	adaptor related protein complex 2 alpha 2 subunit [Source:HGNC Symbol;Acc:HGNC:562]	chr11:925808-1012245	NM_001242837, NM_012305	XM_011519929, XM_011519928	.	.	NP_001229766, NP_036437	XP_011518231, XP_011518232	protein_coding	ENSG00000183020	161	562
AP2B1	.	.	.	.	.	.	75.4894	105.549	90.9045	42.5347	35.2835	36.2715	41.371	42.4321	35.5025	36.9588	42.8875	42.1818	adaptor related protein complex 2 beta 1 subunit [Source:HGNC Symbol;Acc:HGNC:563]	chr17:33914292-34053428	NM_001030006, NM_001282	XM_011524455, XM_011524454, XM_011524453, XM_011524452, XM_011524451, XM_011524450, XM_011524449, XM_011524448, XM_005257941, XM_005257938, XM_005257937	.	.	NP_001025177, NP_001273	XP_005257994, XP_005257995, XP_005257998, XP_011522750, XP_011522751, XP_011522752, XP_011522753, XP_011522754, XP_011522755, XP_011522756, XP_011522757, XP_016879773, XP_016879774, XP_016879775	protein_coding	ENSG00000006125	163	563
AP2M1	.	.	.	.	.	.	323.152	231.857	259.097	72.9409	67.4715	69.3662	64.8233	69.3919	71.1102	71.4143	74.608	71.2737	adaptor related protein complex 2 mu 1 subunit [Source:HGNC Symbol;Acc:HGNC:564]	chr3:183892476-183901879	NM_001025205, NM_004068	.	.	.	NP_001020376, NP_001298127, NP_004059	.	protein_coding	ENSG00000161203	1173	564
AP2S1	.	.	.	.	.	.	320.617	303.126	263.096	46.6424	47.9696	54.4377	47.2546	44.4156	51.2004	45.8753	47.518	45.7669	adaptor related protein complex 2 sigma 1 subunit [Source:HGNC Symbol;Acc:HGNC:565]	chr19:47341392-47354249	NM_001301076, NM_001301078, NM_001301081, NM_004069, NM_021575	XM_011526424, XM_011526423	.	.	NP_001288005, NP_001288007, NP_001288010, NP_004060, NP_067586	XP_011524725, XP_011524726	protein_coding	ENSG00000042753	1175	565
AP3B1	.	.	.	.	.	.	14.4044	25.2667	15.2104	24.5655	24.4118	25.5273	27.7183	29.1195	25.37	25.0592	24.3656	24.7654	adaptor related protein complex 3 beta 1 subunit [Source:HGNC Symbol;Acc:HGNC:566]	chr5:77296348-77590579	NM_001271769, NM_003664	XM_005248618	.	.	NP_001258698, NP_003655	XP_005248675, XP_016865490	protein_coding	ENSG00000132842	8546	566
AP3B2	.	.	.	.	.	.	0.606263	1.54352	0.471443	0.0103832	0	0.0245644	0.024107	0	0	0	0	0.0207663	adaptor related protein complex 3 beta 2 subunit [Source:HGNC Symbol;Acc:HGNC:567]	chr15:83328032-83378666	NM_001278511, NM_001278512, NM_004644	XM_011522098, XM_011522097	.	.	NP_001265440, NP_001265441, NP_004635	.	protein_coding	ENSG00000103723	8120	567
AP3D1	.	.	.	.	.	.	23.2932	19.5324	22.1074	39.3787	33.1236	33.3795	62.2583	64.2222	39.3175	36.5449	39.144	39.6134	adaptor related protein complex 3 delta 1 subunit [Source:HGNC Symbol;Acc:HGNC:568]	chr19:2100986-2151556	NM_001261826, NM_003938	XM_006722932	.	.	NP_001248755, NP_003929	XP_006722995	protein_coding	ENSG00000065000	8943	568
AP3M1	.	.	.	.	.	.	18.9066	33.1765	23.2885	18.1826	19.4338	19.612	20.2039	20.5776	20.0512	20.5821	17.8471	18.5181	adaptor related protein complex 3 mu 1 subunit [Source:HGNC Symbol;Acc:HGNC:569]	chr10:75757871-75910821	NM_001320264, NM_012095, NM_207012	XM_011539636, XM_011539635, XM_006717763	.	.	NP_001307192, NP_001307193, NP_036227, NP_996895	XP_006717826, XP_011537937, XP_011537938	protein_coding	ENSG00000185009	26985	569
AP3M2	.	.	.	.	.	.	12.2464	11.4559	10.8041	4.81423	4.82024	6.27527	3.74506	4.32609	4.77411	5.06819	4.40646	5.222	adaptor related protein complex 3 mu 2 subunit [Source:HGNC Symbol;Acc:HGNC:570]	chr8:42010463-42028701	NM_001134296, NM_006803	XM_017012977	.	.	NP_001127768, NP_006794	XP_016868466	protein_coding	ENSG00000070718	10947	570
AP3S1	.	.	.	.	.	.	31.6323	34.1299	42.4664	56.5902	57.0264	59.9008	76.9678	75.2752	56.862	61.173	55.9595	57.2209	adaptor related protein complex 3 sigma 1 subunit [Source:HGNC Symbol;Acc:HGNC:2013]	chr5:115163896-115249778	NM_001284	XM_011543137, XM_011543135	.	.	NP_001275, NP_001305022	.	protein_coding	ENSG00000177879	1176	2013
AP3S2	.	.	.	.	.	.	36.2171	26.049	14.0196	16.5339	12.547	16.5496	16.818	19.2841	12.5914	14.8449	16.0458	17.0219	adaptor related protein complex 3 sigma 2 subunit [Source:HGNC Symbol;Acc:HGNC:571]	chr15:90373830-90456188	NM_005829	.	.	.	NP_005820	.	protein_coding	ENSG00000157823	10239	571
AP4B1	.	.	.	.	.	.	11.2042	22.1985	11.3525	4.16656	3.60431	3.99157	7.17199	6.72045	5.18443	4.66095	3.74673	4.58639	adaptor related protein complex 4 beta 1 subunit [Source:HGNC Symbol;Acc:HGNC:572]	chr1:114437369-114447692	NM_001253852, NM_001253853, NM_001308312, NM_006594	XM_011540527, XM_011540526, XM_011540525, XM_011540524, XM_011540523	.	.	NP_001240781, NP_001240782, NP_001295241, NP_006585	XP_011538825, XP_011538826, XP_011538827, XP_011538828, XP_016855577, XP_016855579	protein_coding	ENSG00000134262	10717	572
AP4E1	.	.	.	.	.	.	3.16406	5.90618	5.75383	3.76578	3.88057	3.79508	4.47754	5.18345	3.93761	3.93368	3.77862	3.75294	adaptor related protein complex 4 epsilon 1 subunit [Source:HGNC Symbol;Acc:HGNC:573]	chr15:51200869-51298097	NM_001252127, NM_007347	XM_011521409, XM_011521408, XM_006720447, XM_005254264	.	.	NP_001239056, NP_031373	XP_005254321, XP_006720510	protein_coding	ENSG00000081014	23431	573
AP4M1	.	.	.	.	.	.	13.3628	7.00144	7.69064	5.58635	5.77096	5.60565	2.51743	3.0377	5.13304	4.23627	5.95101	5.2217	adaptor related protein complex 4 mu 1 subunit [Source:HGNC Symbol;Acc:HGNC:574]	chr7:99690351-99723134	NM_004722	XM_011516687, XM_011516686, XM_011516685, XM_006716175, XM_005250690, XM_005250689	.	.	NP_004713	XP_005250746, XP_005250747, XP_006716238, XP_011514987, XP_011514988	protein_coding	ENSG00000221838	9179	574
AP4S1	.	.	.	.	.	.	4.11471	3.58745	3.64495	8.56493	7.02378	8.23634	10.1671	10.6175	8.43121	8.07612	7.65708	9.47279	adaptor related protein complex 4 sigma 1 subunit [Source:HGNC Symbol;Acc:HGNC:575]	chr14:31343748-31565656	NM_001128126, NM_001254726, NM_001254727, NM_001254728, NM_001254729, NM_007077	XM_011536372, XM_011536371, XM_005267293	.	.	NP_001121598, NP_001241655, NP_001241656, NP_001241657, NP_001241658, NP_009008	XP_005267350, XP_011534673, XP_011534674	protein_coding	ENSG00000100478	11154	575
AP5B1	.	.	.	.	.	.	9.59567	12.374	10.7205	3.5836	3.27097	3.1948	3.58955	4.05779	3.08039	3.23418	3.57273	3.59446	adaptor related protein complex 5 beta 1 subunit [Source:HGNC Symbol;Acc:HGNC:25104]	chr11:65543363-65548273	NM_138368	.	.	.	NP_612377	.	protein_coding	ENSG00000254470	91056	25104
AP5M1	.	.	.	.	.	.	6.84574	13.5233	8.14693	10.5008	10.339	9.98917	11.7795	11.7225	9.45678	10.6673	10.0552	10.9463	adaptor related protein complex 5 mu 1 subunit [Source:HGNC Symbol;Acc:HGNC:20192]	chr14:57667224-57765460	NM_018229	XM_011536940, XM_006720196	.	.	NP_060699	XP_006720259, XP_011535242	protein_coding	ENSG00000053770	55745	20192
AP5S1	.	.	.	.	.	.	17.3951	11.1001	8.85587	9.35186	8.37476	8.45707	8.60566	9.79909	7.71688	7.37818	9.12702	9.5767	adaptor related protein complex 5 sigma 1 subunit [Source:HGNC Symbol;Acc:HGNC:15875]	chr20:3801170-3809484	NM_001204446, NM_001204447, NM_018347	.	.	.	NP_001191375, NP_001191376, NP_060817	.	protein_coding	ENSG00000125843	55317	15875
AP5Z1	.	.	.	.	.	.	22.1913	29.5132	16.4233	14.5765	13.7421	12.7705	23.5336	24.3773	13.7313	15.1205	13.876	15.277	adaptor related protein complex 5 zeta 1 subunit [Source:HGNC Symbol;Acc:HGNC:22197]	chr7:4815252-4831399	NM_014855	.	.	.	NP_055670	.	protein_coding	ENSG00000242802	9907	22197
APAF1	.	.	.	.	.	.	4.01302	4.4538	4.64556	6.82737	6.0162	5.0053	4.63234	4.47491	6.07703	6.36661	7.1354	6.51934	apoptotic peptidase activating factor 1 [Source:HGNC Symbol;Acc:HGNC:576]	chr12:99038918-100378049	NM_001160, NM_013229, NM_181861, NM_181868, NM_181869	XM_011538252	.	.	NP_001151, NP_037361, NP_863651, NP_863658, NP_863659	XP_016874739	protein_coding	ENSG00000120868	317	576
APBA1	.	.	.	.	.	.	0.0500758	0.00874798	0.0234186	0	0.0115932	0	0	0.0114843	0	0.0148293	0	0	amyloid beta precursor protein binding family A member 1 [Source:HGNC Symbol;Acc:HGNC:578]	chr9:72042445-72287222	NM_001163	XM_017014670, XM_011518617, XM_006717093, XM_005251968	.	.	NP_001154	XP_005252025, XP_006717156, XP_011516919, XP_016870159	protein_coding	ENSG00000107282	320	578
APBA2	.	.	.	.	.	.	2.74235	1.53239	0.86474	0.305074	0.196395	0.166255	0.231661	0.194702	0.133312	0.139486	0.307567	0.302582	amyloid beta precursor protein binding family A member 2 [Source:HGNC Symbol;Acc:HGNC:579]	chr15:29129628-29410518	NM_001130414, NM_005503	XM_017022111, XM_017022105, XM_017022104, XM_017022103, XM_011521496, XM_011521495, XM_011521493, XM_011521492, XM_011521491, XM_011521490, XM_011521489, XM_011521488	.	.	NP_001123886, NP_005494	XP_011519790, XP_011519791, XP_011519792, XP_011519793, XP_011519794, XP_011519795, XP_011519796, XP_011519797, XP_011519798, XP_016877590, XP_016877591, XP_016877592, XP_016877593, XP_016877594, XP_016877595, XP_016877596, XP_016877597, XP_016877598, XP_016877599, XP_016877600, XP_016877601, XP_016877602, XP_016877603, XP_016877604, XP_016877605, XP_016877606	protein_coding	ENSG00000034053	321	579
APBA3	.	.	.	.	.	.	6.2742	6.83251	4.04055	10.1792	11.5261	9.2737	18.5818	17.5625	12.7482	11.0439	9.62343	10.735	amyloid beta precursor protein binding family A member 3 [Source:HGNC Symbol;Acc:HGNC:580]	chr19:3750877-3761697	NM_004886	XM_006722950	.	.	NP_004877	XP_006723013	protein_coding	ENSG00000011132	9546	580
APBB1	.	.	.	.	.	.	1.71612	1.37411	2.74101	1.17163	0.623574	0.670732	1.08055	0.825526	0.684808	0.879517	0.862656	1.4806	amyloid beta precursor protein binding family B member 1 [Source:HGNC Symbol;Acc:HGNC:581]	chr11:6416353-6440644	NM_001164, NM_001257319, NM_001257320, NM_001257321, NM_001257323, NM_001257325, NM_001257326, NM_145689	XM_017017641, XM_017017640, XM_017017639, XM_011520042, XM_011520041, XM_011520040, XM_011520039, XM_011520038, XM_011520037, XM_006718215, XM_006718214, XM_006718213, XM_006718212, XM_006718211, XM_006718210, XM_006718209	NR_047512	.	NP_001155, NP_001244248, NP_001244249, NP_001244250, NP_001244252, NP_001244254, NP_001244255, NP_663722	XP_006718272, XP_006718273, XP_006718274, XP_006718275, XP_006718276, XP_006718277, XP_006718278, XP_011518339, XP_011518340, XP_011518342, XP_011518343, XP_011518344, XP_016873128, XP_016873129, XP_016873130, XP_016873131	protein_coding	ENSG00000166313	322	581
APBB1IP	.	.	.	.	.	.	0.012654	0.168285	0.023039	0	0	0	0	0	0	0	0	0	amyloid beta precursor protein binding family B member 1 interacting protein [Source:HGNC Symbol;Acc:HGNC:17379]	chr10:26727131-26856732	NM_019043	XM_011519514, XM_006717451	.	.	NP_061916	XP_006717514, XP_011517816	protein_coding	ENSG00000077420	54518	17379
APBB2	.	.	.	.	.	.	3.94223	4.84785	4.80123	7.76714	5.45247	5.41407	4.39188	4.4203	5.26599	5.5101	7.25024	8.28403	amyloid beta precursor protein binding family B member 2 [Source:HGNC Symbol;Acc:HGNC:582]	chr4:40812043-41216635	NM_001166050, NM_001166051, NM_001166052, NM_001166053, NM_001166054, NM_004307, NM_173075	XM_017008149, XM_017008148, XM_017008147, XM_017008146, XM_017008145, XM_017008144, XM_017008143, XM_017008142, XM_011513687, XM_011513686, XM_006714012, XM_006714011, XM_006714010, XM_006714009, XM_006714008, XM_006714007, XM_006714006, XM_006714005, XM_005248101	.	.	NP_001159522, NP_001159523, NP_001159524, NP_001159525, NP_001159526, NP_004298, NP_775098	XP_005248158, XP_006714068, XP_006714070, XP_006714071, XP_006714072, XP_006714073, XP_006714074, XP_006714075, XP_011511988, XP_011511989, XP_016863631, XP_016863632, XP_016863633, XP_016863634, XP_016863635, XP_016863636, XP_016863637, XP_016863638, XP_016863639, XP_016863640, XP_016863641, XP_016863642, XP_016863643, XP_016863644, XP_016863645, XP_016863646, XP_016863647	protein_coding	ENSG00000163697	323	582
APBB3	.	.	.	.	.	.	2.71952	1.72356	1.88743	0.239827	0.216939	0.148661	0.155845	0.329471	0.338912	0.0621788	0.361344	0.118309	amyloid beta precursor protein binding family B member 3 [Source:HGNC Symbol;Acc:HGNC:20708]	chr5:139937853-139948688	NM_006051, NM_133172, NM_133173, NM_133174	.	NR_106889	.	NP_006042, NP_573418, NP_573419, NP_573420	.	protein_coding	ENSG00000113108	102465499	20708
APC	.	.	.	.	.	.	2.59587	4.14517	3.15611	3.56036	2.87711	2.92331	2.97039	2.90432	3.42918	3.39902	3.75125	3.36948	APC, WNT signaling pathway regulator [Source:HGNC Symbol;Acc:HGNC:583]	chr5:112073584-112181936	NM_000038, NM_001127510, NM_001127511	.	.	.	NP_000029, NP_001120982, NP_001120983	.	protein_coding	ENSG00000134982	324	583
APC2	.	.	.	.	.	.	1.89582	0.330231	0.785029	0.156698	0.087133	0.0346356	0.0573143	0.0515658	0.0752409	0.0424626	0.156644	0.156752	APC2, WNT signaling pathway regulator [Source:HGNC Symbol;Acc:HGNC:24036]	chr19:1450147-1479555	NM_005883	XM_006722610, XM_006722609, XM_006722608, XM_006722607, XM_005259475	.	.	NP_005874	XP_005259532, XP_006722670, XP_006722671, XP_006722672, XP_006722673	protein_coding	ENSG00000115266	10297	24036
APCDD1	.	.	.	.	.	.	0	0	0.00843727	1.88827	3.9089	2.55568	0.988025	1.84123	3.46167	2.65474	1.41882	2.35773	APC down-regulated 1 [Source:HGNC Symbol;Acc:HGNC:15718]	chr18:10454624-10489945	NM_153000	.	.	.	NP_694545	.	protein_coding	ENSG00000154856	147495	15718
APCDD1L	.	.	.	.	.	.	29.3248	21.7907	24.2742	0	0	0	0	0	0	0	0	0	APC down-regulated 1 like [Source:HGNC Symbol;Acc:HGNC:26892]	chr20:57034156-57089994	NM_153360	.	.	.	NP_001291716, NP_699191	.	protein_coding	ENSG00000198768	164284	26892
APCS	.	.	.	.	.	.	0	0	0	0	0	0	0	0	0	0	0	0	amyloid P component, serum [Source:HGNC Symbol;Acc:HGNC:584]	chr1:159557614-159558655	NM_001639	.	.	.	NP_001630	.	protein_coding	ENSG00000132703	325	584
APEH	.	.	.	.	.	.	62.9845	13.9367	26.5435	35.1235	45.3235	44.1849	29.0903	27.713	42.5941	40.4616	35.2199	35.0271	acylaminoacyl-peptide hydrolase [Source:HGNC Symbol;Acc:HGNC:586]	chr3:49711434-49726486	NM_001640	XM_011533662, XM_011533661, XM_011533660, XM_011533659, XM_011533658, XM_005265098, XM_005265097	.	.	NP_001631	XP_005265154, XP_005265155, XP_011531960, XP_011531961, XP_011531962, XP_011531963, XP_011531964	protein_coding	ENSG00000164062	327	586
APELA	.	.	.	.	.	.	0	0	0	0	0	0	0	0	0	0	0	0	apelin receptor early endogenous ligand [Source:HGNC Symbol;Acc:HGNC:48925]	chr4:165798155-165818675	NM_001297550	.	.	.	NP_001284479	XP_016863112	protein_coding	ENSG00000248329	100506013	48925
APEX1	.	.	.	.	.	.	209.501	99.0488	139.746	192.879	252.11	249.724	182.395	173.993	232.096	231.866	196.931	188.827	apurinic/apyrimidinic endodeoxyribonuclease 1 [Source:HGNC Symbol;Acc:HGNC:587]	chr14:20923349-20929771	NM_001244249, NM_001641, NM_080648, NM_080649	XM_005267582, XM_005267581	.	.	NP_001231178, NP_001632, NP_542379, NP_542380	XP_005267638	protein_coding	ENSG00000100823	328	587
APEX2	.	.	.	.	.	.	29.351	22.331	24.9508	6.32022	7.06642	7.36879	5.83588	5.79281	6.71067	6.33178	6.62873	6.01171	apurinic/apyrimidinic endodeoxyribonuclease 2 [Source:HGNC Symbol;Acc:HGNC:17889]	chrX:55026789-55057497	NM_014481	.	.	.	NP_055296	.	protein_coding	ENSG00000169188	27301	17889
APH1A	.	.	.	.	.	.	144.472	113.457	116.197	96.7495	101.66	98.4923	57.9558	65.2296	82.3545	81.8746	96.9101	96.5889	aph-1 homolog A, gamma-secretase subunit [Source:HGNC Symbol;Acc:HGNC:29509]	chr1:150237798-150253327	NM_001077628, NM_001243771, NM_001243772, NM_016022	XM_006711362	.	.	NP_001071096, NP_001230700, NP_001230701, NP_057106	.	protein_coding	ENSG00000117362	51107	29509
APH1B	◎	.	.	◎	.	◎	4.30805	4.49103	4.10854	2.92224	1.06052	3.00204	0.785176	0.687827	2.47382	1.68067	2.84158	3.0029	aph-1 homolog B, gamma-secretase subunit [Source:HGNC Symbol;Acc:HGNC:24080]	chr15:63569752-63601325	NM_001145646, NM_031301	.	.	.	NP_001139118, NP_112591	.	protein_coding	ENSG00000138613	83464	24080
API5	.	.	.	.	.	.	40.1041	63.3489	41.7938	21.677	26.8875	25.2494	23.8167	24.7973	24.8151	25.379	21.8041	21.5499	apoptosis inhibitor 5 [Source:HGNC Symbol;Acc:HGNC:594]	chr11:43333512-43366079	NM_001142930, NM_001142931, NM_006595	XM_017018465, XM_006718359	.	.	NP_001136402, NP_001136403, NP_006586	XP_006718422, XP_016873953, XP_016873954	protein_coding	ENSG00000166181	8539	594
APIP	.	.	.	.	.	.	16.4713	19.9561	13.8782	11.3059	14.1595	16.6602	13.4483	14.1416	15.0482	15.7346	11.1616	11.4502	APAF1 interacting protein [Source:HGNC Symbol;Acc:HGNC:17581]	chr11:34903841-35017669	NM_015957	.	.	.	NP_057041	.	protein_coding	ENSG00000149089	51074	17581
APITD1	.	.	.	.	.	.	12.2795	13.3873	11.1793	6.24063	8.0056	7.9813	4.83663	3.26411	6.06973	6.91543	6.52217	5.9591	apoptosis-inducing, TAF9-like domain 1 [Source:HGNC Symbol;Acc:HGNC:23163]	chr1:10490158-10512210	NM_199294	.	.	.	NP_954988	.	protein_coding	ENSG00000175279	378708	23163
APITD1-CORT	.	.	.	.	.	.	9.25491	7.36858	5.6757	4.06003	3.25512	2.79056	0.866226	1.21887	4.08618	1.22721	4.05073	4.06933	APITD1-CORT readthrough [Source:HGNC Symbol;Acc:HGNC:38843]	chr1:10490158-10512210	NM_001243768, NM_001270517, NM_198544, NM_199006	.	.	.	NP_001230697, NP_001257446, NP_940946, NP_950171	.	protein_coding	ENSG00000251503	100526739	38843
APLF	.	.	.	.	.	.	0.438268	0.351627	0.262345	0.715607	0.797836	0.733728	0.634037	0.675608	0.540899	0.652851	0.619021	0.812192	aprataxin and PNKP like factor [Source:HGNC Symbol;Acc:HGNC:28724]	chr2:68870720-68885379	NM_138964, NM_173545	.	.	.	NP_620414, NP_775816	.	protein_coding	ENSG00000169621	200558	28724
APLN	.	.	.	.	.	.	4.464	0.0749623	1.72925	0.0154952	0.0575773	0.0315913	0	0	0.0299523	0	0.0309903	0	apelin [Source:HGNC Symbol;Acc:HGNC:16665]	chrX:128779235-128788914	NM_017413	.	.	.	NP_059109	.	protein_coding	ENSG00000171388	8862	16665
APLNR	.	.	.	.	.	.	0	0	0	0	0	0	0	0.0246916	0	0	0	0	apelin receptor [Source:HGNC Symbol;Acc:HGNC:339]	chr11:57001066-57004788	NM_005161	.	.	.	NP_005152	.	protein_coding	ENSG00000134817	187	339
APLP1	.	.	.	.	.	.	0.864478	0.338044	0.953243	1.06127	0.392193	0.690966	0.086923	0.240515	0.458257	0.182454	1.08715	1.03539	amyloid beta precursor like protein 1 [Source:HGNC Symbol;Acc:HGNC:597]	chr19:36358800-36370690	NM_001024807, NM_005166	.	.	.	NP_001019978, NP_005157	.	protein_coding	ENSG00000105290	333	597
APLP2	.	.	.	.	.	.	70.1379	84.7679	97.2944	234.747	262.725	266.962	235.411	243.16	266.934	259.291	233.682	235.813	amyloid beta precursor like protein 2 [Source:HGNC Symbol;Acc:HGNC:598]	chr11:129936835-130014706	NM_001142276, NM_001142277, NM_001142278, NM_001243299, NM_001642	.	.	.	NP_001135748, NP_001135749, NP_001135750, NP_001230228, NP_001315611, NP_001633	.	protein_coding	ENSG00000084234	334	598
APMAP	.	.	.	.	.	.	75.8452	58.6812	71.7425	98.4244	111.641	112.833	146.858	153.689	127.498	127.523	100.52	96.3287	adipocyte plasma membrane associated protein [Source:HGNC Symbol;Acc:HGNC:13238]	chr20:24943560-24973615	NM_020531	XM_005260763	.	.	NP_065392	XP_005260820	protein_coding	ENSG00000101474	57136	13238
APOA1	◎	.	.	◎	.	◎	0.237084	0.110236	0.169034	6051.44	4002.08	4014.83	1425.61	1356.63	2889.02	2733.11	5997.66	6105.22	apolipoprotein A1 [Source:HGNC Symbol;Acc:HGNC:600]	chr11:116706466-116708666	NM_000039, NM_001318017, NM_001318018	XM_005271540, XM_005271539	.	.	NP_000030, NP_001304946, NP_001304947	XP_005271596, XP_005271597	protein_coding	ENSG00000118137	335	600
APOA2	.	.	◎	.	.	◎	0.223558	0.119677	0.128051	2615.66	5302.64	5300.65	3945.46	4068	4423.83	4324.4	2654.07	2577.24	apolipoprotein A2 [Source:HGNC Symbol;Acc:HGNC:601]	chr1:161185068-161193421	NM_001643	.	.	.	NP_001634	.	protein_coding	ENSG00000158874	336	601
APOA4	.	.	.	◎	.	.	0	0.0170475	0	13.6264	9.15977	8.29433	15.2317	17.3863	7.65649	8.03275	13.6537	13.599	apolipoprotein A4 [Source:HGNC Symbol;Acc:HGNC:602]	chr11:116691415-116694022	NM_000482	.	.	.	NP_000473	.	protein_coding	ENSG00000110244	337	602
APOA5	◎	.	.	◎	.	◎	0	0	0	110.053	57.0708	55.433	14.9471	11.3453	31.7256	33.4572	108.391	111.716	apolipoprotein A5 [Source:HGNC Symbol;Acc:HGNC:17288]	chr11:116660082-116663136	NM_001166598, NM_052968	.	.	.	NP_001160070, NP_443200	XP_016872658	protein_coding	ENSG00000110243	116519	17288
APOB	.	.	.	.	.	.	0.00214083	0	0.0150561	867.545	1200.67	1235.66	811.533	839.984	1226.24	1317.06	877.382	857.708	apolipoprotein B [Source:HGNC Symbol;Acc:HGNC:603]	chr2:21224300-21266945	NM_000384	XM_011532809	.	.	NP_000375	.	protein_coding	ENSG00000084674	338	603
APOBEC1	.	.	.	.	.	.	0	0	0	0	0	0	0	0.107628	0	0	0	0	apolipoprotein B mRNA editing enzyme catalytic subunit 1 [Source:HGNC Symbol;Acc:HGNC:604]	chr12:7801995-7818489	NM_001304566, NM_001644, NM_005889	.	.	.	NP_001291495, NP_001635, NP_005880	.	protein_coding	ENSG00000111701	339	604
APOBEC2	.	.	.	.	.	.	0	0	0	0.449511	0.320489	0.280902	0.137446	0.0637201	0.200888	0.246913	0.560972	0.338051	apolipoprotein B mRNA editing enzyme catalytic subunit 2 [Source:HGNC Symbol;Acc:HGNC:605]	chr6:41021042-41032250	NM_006789	.	.	.	NP_006780	.	protein_coding	ENSG00000124701	10930	605
APOBEC3A	.	.	.	.	.	.	5.10084e-34	0.152877	0.0440693	7.24454e-130	4.72588e-27	9.28038e-29	3.01587e-27	2.87912e-52	9.38252e-38	3.50045e-82	1.44891e-129	1.72056e-185	apolipoprotein B mRNA editing enzyme catalytic subunit 3A [Source:HGNC Symbol;Acc:HGNC:17343]	chr22:39348755-39388809	NM_001270406, NM_145699	.	.	.	NP_001257335, NP_663745	.	protein_coding	ENSG00000128383	100913187	17343
APOBEC3B	.	.	.	.	.	.	34.23	74.7259	55.2498	3.55925	4.64599	4.56897	4.41052	4.64068	3.31795	3.20559	3.4807	3.6378	apolipoprotein B mRNA editing enzyme catalytic subunit 3B [Source:HGNC Symbol;Acc:HGNC:17352]	chr22:39348755-39388809	NM_001270411, NM_004900	.	.	.	NP_001257340, NP_004891	.	protein_coding	ENSG00000179750	9582	17352
APOBEC3C	◎	.	.	◎	.	◎	55.0703	25.2339	36.0489	10.6216	9.75842	10.5649	2.40484	2.03103	6.74605	6.69206	10.1019	11.1412	apolipoprotein B mRNA editing enzyme catalytic subunit 3C [Source:HGNC Symbol;Acc:HGNC:17353]	chr22:39410087-39429281	NM_014508	.	.	.	NP_055323	.	protein_coding	ENSG00000244509	27350	17353
APOBEC3D	.	.	.	.	.	.	0.247681	0.110283	0.212303	0.270886	0.254929	0.156945	0	0.0418787	0.0438445	0.0893692	0.10708	0.434691	apolipoprotein B mRNA editing enzyme catalytic subunit 3D [Source:HGNC Symbol;Acc:HGNC:17354]	chr22:39410087-39429281	NM_152426	XM_005261337	.	.	NP_689639	XP_005261394	protein_coding	ENSG00000243811	140564	17354
APOBEC3F	.	.	.	.	.	.	6.21511	6.01571	6.048	1.21388	1.57993	1.26829	0.448073	0.174317	0.48408	1.16077	0.724682	1.70308	apolipoprotein B mRNA editing enzyme catalytic subunit 3F [Source:HGNC Symbol;Acc:HGNC:17356]	chr22:39436608-39483748	NM_001006666, NM_145298	XM_011529994	.	.	NP_001006667, NP_660341	XP_011528296, XP_016884132	protein_coding	ENSG00000128394	200316	17356
APOBEC3G	.	.	.	.	.	.	2.26203	0.729179	2.03974	0.385437	0.283423	0.774115	0.0412989	0	0.20092	0.542188	0.443532	0.327343	apolipoprotein B mRNA editing enzyme catalytic subunit 3G [Source:HGNC Symbol;Acc:HGNC:17357]	chr22:39436608-39483748	NM_021822	XM_006724290	.	.	NP_068594	XP_006724353	protein_coding	ENSG00000239713	60489	17357
APOBEC3H	.	.	.	.	.	.	0.775164	0.40353	0.334669	0	0	0	0	0	0	0	0	0	apolipoprotein B mRNA editing enzyme catalytic subunit 3H [Source:HGNC Symbol;Acc:HGNC:24100]	chr22:39493228-39500072	NM_001166002, NM_001166003, NM_001166004, NM_181773	XM_011529992, XM_011529991, XM_011529990	.	.	NP_001159474, NP_001159475, NP_001159476, NP_861438	XP_011528292, XP_011528293, XP_011528294	protein_coding	ENSG00000100298	164668	24100
APOBEC4	.	.	.	.	.	.	0	0	0	0	0	0	0	0	0	0	0	0	apolipoprotein B mRNA editing enzyme catalytic polypeptide like 4 [Source:HGNC Symbol;Acc:HGNC:32152]	chr1:183605219-183897665	NM_203454	.	.	.	NP_982279	.	protein_coding	ENSG00000173627	403314	32152
APOBR	.	.	.	.	.	.	0.103695	0.0176133	0.0836316	0.178504	0.0646407	0.0354278	0	0.0461157	0.081395	0.040496	0.171262	0.185747	apolipoprotein B receptor [Source:HGNC Symbol;Acc:HGNC:24087]	chr16:28485431-28510291	NM_018690	.	.	.	NP_061160	.	protein_coding	ENSG00000184730	55911	24087
APOC1	.	.	.	.	.	.	77.0133	29.732	31.8179	456.955	465.81	440.433	351.109	358.639	329.166	333.628	450.55	463.359	apolipoprotein C1 [Source:HGNC Symbol;Acc:HGNC:607]	chr19:45417503-45422603	NM_001321066, NM_001645	XM_005258855	.	.	NP_001307994, NP_001307995, NP_001636	XP_005258912	protein_coding	ENSG00000130208	341	607
APOC2	.	.	.	.	.	.	0	0	0	31.8872	30.7018	15.5457	24.901	20.6525	29.5808	35.2226	37.6982	26.0762	apolipoprotein C2 [Source:HGNC Symbol;Acc:HGNC:609]	chr19:45445494-45452822	.	.	.	.	.	.	protein_coding	ENSG00000234906	.	609
APOC3	◎	◎	.	◎	.	◎	0	0	0	1055.31	580.017	567.893	75.736	72.673	262.941	271.018	1054.46	1056.15	apolipoprotein C3 [Source:HGNC Symbol;Acc:HGNC:610]	chr11:116700607-116703788	NM_000040	.	.	.	NP_000031	.	protein_coding	ENSG00000110245	345	610
APOC4	.	.	.	.	.	.	0	0	0	1.0182	0.735174	1.24152	0.300455	0.42424	0.294966	1.04115	1.12985	0.90654	apolipoprotein C4 [Source:HGNC Symbol;Acc:HGNC:611]	chr19:45445494-45452822	NM_001646	.	.	.	NP_001637	.	protein_coding	ENSG00000267467	346	611
APOC4-APOC2	.	.	.	.	.	.	0	0	0	343.154	345.909	356.091	215.975	217.718	260.483	261.715	348.791	337.517	APOC4-APOC2 readthrough (NMD candidate) [Source:HGNC Symbol;Acc:HGNC:44426]	chr19:45445494-45452822	NM_000483	.	.	.	NP_000474	.	protein_coding	ENSG00000224916	344	44426
APOD	.	.	.	.	.	.	0.150326	0.171778	0.683147	0	0	0	0.0733114	0	0	0.0872497	0	0	apolipoprotein D [Source:HGNC Symbol;Acc:HGNC:612]	chr3:195295572-195311076	NM_001647	.	.	.	NP_001638	.	protein_coding	ENSG00000189058	347	612
APOE	.	.	.	.	.	.	247.197	157.023	185.924	1353.8	1280.64	1264.48	785.552	698.792	982.895	932.843	1331.77	1375.83	apolipoprotein E [Source:HGNC Symbol;Acc:HGNC:613]	chr19:45409010-45412650	NM_000041, NM_001302688, NM_001302689, NM_001302690, NM_001302691	.	.	.	NP_000032, NP_001289617, NP_001289618, NP_001289619, NP_001289620	.	protein_coding	ENSG00000130203	348	613
APOF	◎	.	.	◎	.	◎	0	0	0	3.192	6.41609	6.07283	1.03256	1.31137	4.26094	3.66099	3.25278	3.13123	apolipoprotein F [Source:HGNC Symbol;Acc:HGNC:615]	chr12:56754352-56756607	NM_001638	.	.	.	NP_001629	.	protein_coding	ENSG00000175336	319	615
APOH	◎	.	.	◎	.	◎	0	0.0618083	0	2072.8	2253.33	2358.61	482.839	453.429	1528.31	1573.79	2096.38	2049.22	apolipoprotein H [Source:HGNC Symbol;Acc:HGNC:616]	chr17:64208150-64225535	NM_000042	.	.	.	NP_000033	.	protein_coding	ENSG00000091583	350	616
APOL1	◎	.	.	.	.	◎	8.35592	2.99587	2.94823	36.6269	56.7965	51.918	24.8992	25.9009	44.9461	46.3044	37.8632	35.3906	apolipoprotein L1 [Source:HGNC Symbol;Acc:HGNC:618]	chr22:36649055-36663576	NM_001136540, NM_001136541, NM_003661, NM_145343	XM_005261796	.	.	NP_001130012, NP_001130013, NP_003652, NP_663318	XP_005261853	protein_coding	ENSG00000100342	8542	618
APOL2	.	.	.	.	.	.	12.5621	17.9992	10.9574	18.899	21.1405	18.722	24.1686	26.3019	21.1664	20.9682	18.472	19.3261	apolipoprotein L2 [Source:HGNC Symbol;Acc:HGNC:619]	chr22:36622248-36636000	NM_030882, NM_145637	XM_017028724, XM_011530078, XM_011530077, XM_011530076, XM_011530075, XM_011530074	.	.	NP_112092, NP_663612	XP_011528376, XP_011528377, XP_011528378, XP_011528379, XP_011528380, XP_016884213	protein_coding	ENSG00000128335	23780	619
APOL3	.	.	.	.	.	.	4.61848	0.4424	1.29413	2.38254	2.35848	1.95769	1.01229	1.41355	1.65992	1.45763	2.3822	2.38288	apolipoprotein L3 [Source:HGNC Symbol;Acc:HGNC:14868]	chr22:36536377-36562225	NM_014349, NM_030644, NM_145639, NM_145640, NM_145641, NM_145642	XM_017028952, XM_017028947, XM_017028946, XM_006724325, XM_006724324, XM_006724323	.	.	NP_055164, NP_085147, NP_663614, NP_663615, NP_663616, NP_663617	XP_006724386, XP_006724387, XP_006724388, XP_016884435, XP_016884436, XP_016884437, XP_016884438, XP_016884439, XP_016884440, XP_016884441	protein_coding	ENSG00000128284	80833	14868
APOL4	.	.	.	.	.	.	0	0.0170612	0	0.621325	0.615744	0.812131	0.0924317	0.137179	0.45446	0.314868	0.734597	0.508053	apolipoprotein L4 [Source:HGNC Symbol;Acc:HGNC:14867]	chr22:36585176-36600886	NM_030643, NM_145660	.	.	.	NP_085146, NP_663693	.	protein_coding	ENSG00000100336	80832	14867
APOL5	.	.	.	.	.	.	0	0	0	0	0	0	0	0	0	0	0	0	apolipoprotein L5 [Source:HGNC Symbol;Acc:HGNC:14869]	chr22:36113918-36125530	NM_030642	.	.	.	.	.	protein_coding	ENSG00000128313	80831	14869
APOL6	.	.	.	.	.	.	6.89769	4.47939	3.44701	3.77631	3.08906	3.37629	5.35041	5.21268	5.07634	4.83835	3.91067	3.64195	apolipoprotein L6 [Source:HGNC Symbol;Acc:HGNC:14870]	chr22:36044441-36064456	NM_030641	XM_011530392	.	.	NP_085144	XP_011528694	protein_coding	ENSG00000221963	80830	14870
APOLD1	.	.	.	.	.	.	1.65634	2.54192	1.966	0.122261	0.0576523	0.129489	0.0418035	0	0.0613654	0.0734541	0.104002	0.14052	apolipoprotein L domain containing 1 [Source:HGNC Symbol;Acc:HGNC:25268]	chr12:12878864-12944400	NM_001130415, NM_030817	.	.	.	NP_001123887, NP_110444	.	protein_coding	ENSG00000178878	81575	25268
APOM	.	.	◎	.	.	◎	0.968791	0.716661	0.663971	93.7756	210.759	204.993	126.213	126.281	201.727	182.83	98.1861	89.3651	apolipoprotein M [Source:HGNC Symbol;Acc:HGNC:13916]	chr6:31606804-31625987	NM_001256169, NM_019101	XM_006715150	.	.	NP_001243098, NP_061974	XP_006715213	protein_coding	ENSG00000204444	55937	13916
[truncated: 18,612 more rows]

## Sheet: Table. S2.
Category	Term	Count	%	P-value	Genes	List Total	Pop Hits	Pop Total	Fold Enrichment	Bonferroni	Benjamini	FDR
[truncated: 9 more rows]

## Sheet: Table. S3.
Category	Term	Count	%	P-value	Genes	List Total	Pop Hits	Pop Total	Fold Enrichment	Bonferroni	Benjamini	FDR
[truncated: 126 more rows]
